# Supplementary material for: Strategies Shaping the Transcription of Carbohydrate-Active Enzyme Genes in Aspergillus nidulans
Source: MDPI journal article supplement (doi:10.3390/jof8010079), 2022-01-14
Supplement: s1 [file s1]

**Table S1** RT-qPCR primer pairs used in the study.

| Gene                    | Foward primer                 | Reverse primer               |
|-------------------------|-------------------------------|------------------------------|
| AN0241 ( <i>sodA</i> )  | 5'-CTTCCACATCCACCAGTTC-3'     | 5'-CAGCGTTACCAGTCTTCTTG-3'   |
| AN0399 ( <i>nrtB</i> )  | 5'-GCGGGACAGATTGAGAGTTC-3'    | 5'-AGAGGGAAGTTGAGGAGATAG-3'  |
| AN0423 ( <i>xyrA</i> )  | 5'-ATTGGGTAAAGGCGACTATCC-3'   | 5'-AAGGTATGGGTGGTGCTC-3'     |
| AN0756 ( <i>lacA</i> )  | 5'-GCTGCTGGTGTTGCTCTTAC-3'    | 5'-ACTCTCCTGGCTTTCCTTCG-3'   |
| AN0942 ( <i>ladA</i> )  | 5'-CCTTTACTCTCTTCACCTCTCC-3'  | 5'-TCACCACTCTTCACCTCTTCG-3'  |
| AN0973 ( <i>brlA</i> )  | 5'-CGACTTTCTCTCTGGATACGATG-3' | 5'-CTGGTGACGGTAGTTGTTGTTG-3' |
| AN1006 ( <i>niaD</i> )  | 5'-TATGTCGTCCCAAACCCG-3'      | 5'-TTATTCTTCGTCCGCCTCC-3'    |
| AN1414 ( <i>xprG</i> )  | 5'-CGATGCCAGTATATCCGTG-3'     | 5'-GTCAGTTCTGCTCCTTG-3'      |
| AN1812 ( <i>jlbA</i> )  | 5'-ATCTCTCCCCATTCTTCAGC-3'    | 5'-GTCGTCCGCCGTAGTTGTG-3'    |
| AN2463 ( <i>lacF</i> )  | 5'-CGGGCACACTTCTACTCATAC-3'   | 5'-TACGACACATTTGGCGGCG-3'    |
| AN2814 ( <i>lacpB</i> ) | 5'-CGTCTCCTTCTGCTGTGC-3'      | 5'-GTGCTTGCCGTTGCGATG-3'     |
| AN3199 ( <i>lacpA</i> ) | 5'-CGATTCCAGCCGTCTTCTTC-3'    | 5'-AGCCGTAAACAACCCAGC-3'     |
| AN3201 ( <i>lacD</i> )  | 5'-GCTGCTGAACGGGGATTG-3'      | 5'-GGGGAACGGGAAGATGAC-3'     |
| AN3581 ( <i>trxR</i> )  | 5'-TGGCAGAACGGTATCAGCG-3'     | 5'-GCGGACAAGCACGGTAACG-3'    |
| AN4871 ( <i>chiB</i> )  | 5'-TGGTCAACAGGCGAATCTC-3'     | 5'-CGGGACGAAGGATCATACG-3'    |
| AN4957 ( <i>galE</i> )  | 5'-CGCTGAGGTTTATGCCACTG-3'    | 5'-CACTGCTGTAGGGAGGAC-3'     |
| AN6388 ( <i>lacE</i> )  | 5'-ATGTCGTGCGTCTGCCTC-3'      | 5'-GTTCTCTTCCCCTTGCTGC-3'    |
| AN6542 ( <i>actA</i> )  | 5'-GAAGTCCTACGAACTGCCTGATG-3' | 5'-AAGAACGCTGGGCTGGAA-3'     |
| AN6700                  | 5'-CTATTCCCGAGCAAGTTC-3'      | 5'-TGATGTTCCCTGACGATGGC-3'   |
| AN6838 ( <i>tubC</i> )  | 5'-CGGAAACTCGCCGTCAATAT-3'    | 5'-GGGCAAACCCGACAATAA-3'     |
| AN8218 ( <i>trxB</i> )  | 5'-TCACCTCAATCGTCCCTG-3'      | 5'-TGCTCGTATCCGTCACAC-3'     |
| AN8445                  | 5'-TTGAAGCCACGACAATGAC-3'     | 5'-AGATGCCTACGATACCAG-3'     |
| AN8692 ( <i>prxA</i> )  | 5'-CTGGACTGAGGAGAAGGG-3'      | 5'-CAAGGACGGCAACAACATCG-3'   |
| AN9064 ( <i>xdhA</i> )  | 5'-TCTATTGTGCTGTGCGGTAG-3'    | 5'-TCCCAAGGTCATTCTCTGC-3'    |
| AN9339 ( <i>catB</i> )  | 5'-CCGAGCCCACAACACTTAC-3'     | 5'-GTTCAGCGACGACAATGACG-3'   |
| AN9397 ( <i>hacA</i> )  | 5'-AGACGAAGAATGTGGTGGC-3'     | 5'-ACGCTGAAGAAGGAAGTGG-3'    |
| AN10220 ( <i>ccpI</i> ) | 5'-GCGACCAAGAACCAAGACC-3'     | 5'-AACCAACAGGCGGAAAACTC-3'   |
| AN10543 ( <i>galX</i> ) | 5'-TGACGGGATGGGATTCTTGAC-3'   | 5'-GGGATACGCAGGGTGATAG-3'    |
| AN10550 ( <i>galR</i> ) | 5'-TATCACAGAGGAGCAACGGG-3'    | 5'-TCATCAGAGGGAGGAAGAACC-3'  |
