# Supplementary material for: Strategies Shaping the Transcription of Carbohydrate-Active Enzyme Genes in Aspergillus nidulans
Source: J Fungi (Basel). 2022 Jan 14;8(1):79. doi: 10.3390/jof8010079 (PMC8780418; doi:10.3390/jof8010079)
Supplement: Supplementary file 1 [file jof-08-00079-s001.zip]

Archive with 7 entries (7 files):
- jof-1527581-supplementary/Figure S1.pdf
- jof-1527581-supplementary/Table S1.pdf
- jof-1527581-supplementary/Table S2.xlsx
- jof-1527581-supplementary/Table S3.xlsx
- jof-1527581-supplementary/Table S4.xlsx
- jof-1527581-supplementary/Table S5.xlsx
- jof-1527581-supplementary/Table S6.xlsx
