# Supplementary material for: Strategies Shaping the Transcription of Carbohydrate-Active Enzyme Genes in Aspergillus nidulans
Source: J Fungi (Basel). 2022 Jan 14;8(1):79. doi: 10.3390/jof8010079 (PMC8780418; doi:10.3390/jof8010079)
Supplement: Supplementary file 1 [file jof-08-00079-s001.zip › jof-1527581-supplementary/Table S2.xlsx]

## Sheet: Overview
	Table S2 RNAseq data of selected gene groups.
	Sheet 1	Transcriptome data (log2FC values) of "Lactose utilization", "Oxidative pentose-phosphate shunt", "Glycolysis", "TCA cycle", "Autophagy", "Cell wall", "Extracellular peptidase" and "Carbohydrate-active enzyme" genes.
		Red and blue colors indicate upregulated and downregulated genes, respectively.
		Significant enrichment (Fisher's exact test, p < 0.05) of genes belonging to a term in a gene set is highlighted with yellow.
		a - According to Aspergillus Genome Database (http://www.aspgd.org/).
		b - According to the reference(s) mentioned at the definition of the appropriate gene group in the Materials and methods chapter of the manuscript.
	Sheet 2	Transcriptome data (log2FC values) of "Antioxidant enzyme", "Squalene - ergosterol pathway", "Ribosome biogenesis", "Mitotic cell cycle" and "Transcription factor" genes.
		Red and blue colors indicate upregulated and downregulated genes, respectively.
		Significant enrichment (Fisher's exact test, p < 0.05) of genes belonging to a term in a gene set is highlighted with yellow.
		a - According to Aspergillus Genome Database (http://www.aspgd.org/).
		b - According to the reference(s) mentioned at the definition of the appropriate gene group in the Materials and methods chapter of the manuscript.

## Sheet: Sheet 1
	Transcriptome data (log2FC values) of "Lactose utilization", "Oxidative pentose-phosphate shunt", "Glycolysis", "TCA cycle", "Autophagy", "Cell wall", "Extracellular peptidase" and "Carbohydrate-active enzyme" genes.
	Red and blue colors indicate upregulated and downregulated genes, respectively.
	Significant enrichment (Fisher's exact test, p < 0.05) of genes belonging to a term in a gene set is highlighted with yellow.
	a - According to Aspergillus Genome Database (http://www.aspgd.org/).
	b - According to the reference(s) mentioned at the definition of the appropriate gene group in the Materials and methods chapter of the manuscript.
Lactose utilization genes
GENEID	Gene namea	Featurea	Descriptionb		log2FC values				Regulation (up=1, down=-1)
					Lactose containing cultures	Arabinogalactan containing cultures	Carbon starved cultures		Culture specific gene
					vs.	vs.	vs.		Glucose	Lactose	Arabinogalactan	No carbon source
					Glucose containing cultures	Glucose containing cultures	Glucose containing cultures
AN0756	lacA	Beta-galactosidase with a predicted role in lactose metabolism	beta-galactosidase		1.57693	2.18076	-0.16344
AN0980	lacB	Beta-galactosidase with a predicted role in lactose metabolism	beta-galactosidase		-0.181199	0.225962	-0.841153
AN2463	lacF	Putative beta-galactosidase with a predicted role in lactose metabolism	beta-galactosidase		1.04338	2.44524	0.749321				1
AN3201	lacD	Putative beta-galactosidase with a predicted role in lactose metabolism	beta-galactosidase		10.9145	9.69642	3.04686		-1	1
AN6388	lacE	Putative beta-galactosidase with a predicted role in polysaccharide degradation	beta-galactosidase		1.90721	1.78479	1.95048		-1
AN0194	lacC	Putative beta-galactosidase	beta-galactosidase		0.958218	1.85477	2.51217
AN2804		Putative beta-galactosidase; transcript repressed by nitrate	beta-galactosidase		4.06831	5.90977	0.819406				1
AN1107		Protein of unknown function	beta-galactosidase		0.997691	1.53303	1.59346
AN3199	lacpA	MFS sugar transporter; induced by lactose and galactose	lactose permease		5.81546	6.78333	0.3452
AN2814	lacpB	Ortholog(s) have role in cellobiose transport, ethanol biosynthetic process	lactose permease		7.97021	8.3439	5.41062		-1
AN1577	lacpC	Has domain(s) with predicted transmembrane transporter activity, role in transmembrane transport and integral component of membrane, membrane localization	lactose permease		0.234012	5.84748	-1.51208				1	-1
AN4957	galE	Putative galactokinase with a predicted role in galactose and galactitol metabolism	Leloir pathway		0.394411	1.06158	1.09013
AN6182	galD	Putative hexose-1-phosphate uridylyltransferase with a predicted role in galactose and galactitol metabolism; expression upregulated after exposure to farnesol	Leloir pathway		0.578549	-0.0707184	0.0314767
AN9148	galF	Putative UTP-glucose-1-phosphate uridylyltransferase with a predicted role in galactose and galactitol metabolism; protein expressed at decreased levels in a hapX mutant versus wild-type	Leloir pathway		0.212023	-1.08251	-2.03386
AN4727	ugeA/galG	UDP-glucose 4-epimerase, involved in galactose metabolism; converts UDP-galactose to UDP-glucose; intracellular; protein abundance decreased by menadione stress	Leloir pathway		-1.52809	-2.94776	-3.09764		1
AN2867	pgmB	Putative phosphoglucomutase with a predicted role in carbohydrate metabolism; intracellular; protein abundance decreased by menadione stress; transcript levels increase during asexual development	Leloir pathway		0.447202	-0.361432	-1.38744					-1
AN7459	hxkA	Putative hexokinase with a predicted role in carbohydrate metabolism	D-galactose oxidoreductive pathway	glycolysis	-0.334444	-1.17659	-1.33494
AN0942	ladA	Putative L-arabinitol 4-dehydrogenase with a predicted role in L-arabinose/arabitol and D-xylose/D,L-xylulose/xylitol metabolism; transcriptionally induced by growth on xylose	D-galactose oxidoreductive pathway	pentose catabolism pathway	2.97668	4.73891	5.56288		-1
AN10169	lxrA	Short-chain dehydrogenase; transcriptionally induced by growth on xylose	D-galactose oxidoreductive pathway	pentose catabolism pathway	0.905438	0.97608	0.280927
AN9064	xdhA	Xylitol dehydrogenase with a predicted role in amino acid or carbohydrate metabolism; putative D-xylulose reductase; transcriptionally induced by growth on xylose	D-galactose oxidoreductive pathway	pentose catabolism pathway	1.14231	1.51841	1.38222		-1
AN0423	xyrA	Putative D-xylose reductase with a predicted role in carbohydrate metabolism; transcriptionally induced by growth on xylose	D-galactose oxidoreductive pathway	pentose catabolism pathway	1.06948	3.83127	0.829613				1
AN10543	galX	Putative transcription factor required for galactose utilization	transcription factor		7.37159	0.143575	0.374346			1
AN10550	galR	Zn(2)Cys(6) binuclear cluster domain transcription factor involved in regulation of genes of galactose conversion pathway	transcription factor		6.57739	-0.107895	-1.25531			1		-1
All genes			Number of upregulated genes in the group:		12	14	8		1	3	4	0
			Number of downregulated genes in the group:		1	3	6		4	0	0	3
			Number of genes in the group:		23	23	23		23	23	23	23
			Total number of upregulated genes:		1749	2159	2371		918	286	322	433
			Total number of downregulated genes:		1270	1705	1960		1193	69	148	203
			Total number of genes:		10867	10867	10867		10867	10867	10867	10867
			p value for the upregulated genes:		6.887e-05	1.897e-05	0.1082		0.8689	0.02164	0.00429	1
			p value for the downregulated genes:		0.9428	0.7232	0.2233		0.2412	1	1	0.008636
beta-galactosidase - lactose permease			Number of upregulated genes in the group:		7	10	5		0	1	3	0
			Number of downregulated genes in the group:		0	0	1		2	0	0	1
			Number of genes in the group:		10	10	10		10	10	10	10
			Total number of upregulated genes:		1749	2159	2371		918	286	322	433
			Total number of downregulated genes:		1270	1705	1960		1193	69	148	203
			Total number of genes:		10867	10867	10867		10867	10867	10867	10867
			p value for the upregulated genes:		0.0002114	9.422e-08	0.04628		1	0.2342	0.002649	1
			p value for the downregulated genes:		1	1	0.8633		0.3019	1	1	0.1719
Leloir pathway			Number of upregulated genes in the group:		0	1	1		1	0	0	0
			Number of downregulated genes in the group:		1	2	3		0	0	0	1
			Number of genes in the group:		5	5	5		5	5	5	5
			Total number of upregulated genes:		1749	2159	2371		918	286	322	433
			Total number of downregulated genes:		1270	1705	1960		1193	69	148	203
			Total number of genes:		10867	10867	10867		10867	10867	10867	10867
			p value for the upregulated genes:		1	0.6697	0.708		0.3569	1	1	1
			p value for the downregulated genes:		0.4629	0.1776	0.04391		1	1	1	0.08999
D-galactose oxidoreductive pathway			Number of upregulated genes in the group:		3	3	2		0	0	1	0
			Number of downregulated genes in the group:		0	1	1		2	0	0	0
			Number of genes in the group:		5	5	5		5	5	5	5
			Total number of upregulated genes:		1749	2159	2371		918	286	322	433
			Total number of downregulated genes:		1270	1705	1960		1193	69	148	203
			Total number of genes:		10867	10867	10867		10867	10867	10867	10867
			p value for the upregulated genes:		0.03224	0.05687	0.3003		1	1	0.1397	1
			p value for the downregulated genes:		1	0.5741	0.6302		0.09613	1	1	1
Oxidative pentose-phosphate shunt genes
GENEID	Gene namea	Featurea	Descriptionb		log2FC values				Regulation (up=1, down=-1)
					Lactose containing cultures	Arabinogalactan containing cultures	Carbon starved cultures		Culture specific gene
					vs.	vs.	vs.		Glucose	Lactose	Arabinogalactan	No carbon source
					Glucose containing cultures	Glucose containing cultures	Glucose containing cultures
AN2981	gsdA	Putative glucose 6-phosphate 1-dehydrogenase with a predicted role in the pentose-phosphate shunt; intracellular, menadione stress-induced protein; transcript downregulated by growth in ethanol	Glucose-6-phosphate 1-dehydrogenase		0.341656	-2.21327	-1.84184
AN0285		Putative 6-phosphogluconolactonase with a predicted role in gluconic acid and gluconate metabolism; expression upregulated after exposure to farnesol	6-Phosphoglucono lactonase		-0.145625	-1.68375	-2.0208
AN3954		Putative phosphogluconate dehydrogenase (decarboxylating) with a predicted role in the pentose-phosphate shunt	Phosphogluconate dehydrogenase		-0.202422	-1.74153	-1.60808
AN4913	phk	Putative phosphoketolase with a predicted role in the phosphoketolase pathway	Transketolase		-1.37682	-1.72734	-0.820371
AN0688		Putative transketolase with a predicted role in the pentose-phosphate shunt or xylulose metabolism	Transketolase		-0.229964	-1.27716	-1.83643
AN0240	pppA	Putative transaldolase with a predicted role in the pentose-phosphate shunt; intracellular, menadione stress-induced protein; protein induced by farnesol	Transaldolase		-0.619605	-1.71413	-1.99981
AN9443		Has domain(s) with predicted catalytic activity and role in carbohydrate metabolic process	Transaldolase		7.04397	4.96111	5.53251		-1	1
AN6113		Has domain(s) with predicted catalytic activity and role in carbohydrate metabolic process	Transaldolase		0.943211	3.23565	2.71175
AN8792		Has domain(s) with predicted catalytic activity and role in carbohydrate metabolic process	Transaldolase		0.801856	1.09736	2.42093					1
AN8935		Putative transferase with a predicted role in the pentose-phosphate shunt or xylulose metabolism	Formaldehyde transketolase		0.995363	1.85143	1.72569
AN8551		Putative transferase with a predicted role in the pentose-phosphate shunt or xylulose metabolism	Formaldehyde transketolase		0.767823	2.24929	0.802367				1
AN9180		Putative transketolase; intracellular; protein abundance decreased by menadione stress	Formaldehyde transketolase		0.37287	-3.4459	-3.84995
			Number of upregulated genes in the group:		1	5	4		0	1	1	1
			Number of downregulated genes in the group:		1	7	6		1	0	0	0
			Number of genes in the group:		12	12	12		12	12	12	12
			Total number of upregulated genes:		1749	2159	2371		918	286	322	433
			Total number of downregulated genes:		1270	1705	1960		1193	69	148	203
			Total number of genes:		10867	10867	10867		10867	10867	10867	10867
			p value for the upregulated genes:		0.8784	0.0707	0.2557		1	0.274	0.3031	0.3863
			p value for the downregulated genes:		0.7751	0.0008826	0.0117		0.7525	1	1	1
Glycolysis genes
GENEID	Gene namea	Featurea	Descriptionb		log2FC values				Regulation (up=1, down=-1)
					Lactose containing cultures	Arabinogalactan containing cultures	Carbon starved cultures		Culture specific gene
					vs.	vs.	vs.		Glucose	Lactose	Arabinogalactan	No carbon source
					Glucose containing cultures	Glucose containing cultures	Glucose containing cultures
AN8689	glkA	Putative glucokinase; ORF that was absent from the original release of version 4 of the A. nidulans annotation, but present in a previous version; reinstated into version 4 in AspGD as of July 2009	Glucokinase		-1.79817	-2.35303	-1.26838		1
AN7459	hxkA	Putative hexokinase with a predicted role in carbohydrate metabolism	Hexokinase		-0.334444	-1.17659	-1.33494
AN2638	hxkB	Putative hexokinase with a predicted role in carbohydrate metabolism	Hexokinase		-2.81876	-0.632906	1.39187
AN6037	swoM	Putative glucose-6-phosphate isomerase with a predicted role in gluconeogenesis and glycolysis; mutant defective in hyphal polarity and conidiation	Glucose-6-phosphate isomerase		0.295666	-0.921271	-0.482814
AN3223	pfkA	Putative 6-phosphofructokinase with a predicted role in gluconeogenesis and glycolysis; upregulated under hypoxic growth conditions	6-Phosphofructokinase		-3.12724	-5.96359	-5.54219		1
AN2875	fbaA	Putative fructose-bisphosphate aldolase with a predicted role in gluconeogenesis and glycolysis; intracellular, menadione stress-induced protein; palA-dependent expression independent of pH	Fructose-bisphosphate aldolase		-0.774323	-1.58937	-2.40455
AN6900	tpiA	Putative triose-phosphate isomerase with a predicted role in gluconeogenesis and glycolysis; protein induced by farnesol	Triose-phosphate isomerase		-0.980221	-1.36561	-1.55016
AN5908	tpiB	Putative triose-phosphate isomerase with a predicted role in glycolysis	Triose-phosphate isomerase		-0.413447	-2.10604	-1.69644
AN8041	gpdA	Glyceraldehyde-3-phosphate dehydrogenase with a predicted role in gluconeogenesis and glycolysis; the gpdA promoter is a commonly used regulatory sequence for driving constitutive heterologous gene expression	Glyceraldehyde-3-phosphate dehydrogenase		-1.78481	-3.8959	-4.07363		1
AN2583	gpdC	Putative glyceraldehyde-3-phosphate dehydrogenase with a predicted role in gluconeogenesis and glycolysis	Glyceraldehyde-3-phosphate dehydrogenase		0.537382	0.6776	-0.909299
AN1246	pgkA	Putative phosphoglycerate kinase with a predicted role in gluconeogenesis and glycolysis; intracellular, menadione stress-induced protein; promoter activity is greater on gluconeogenic than on glycolytic carbon sources	Phosphoglycerate kinase		-2.14486	-3.68363	-4.58282		1
AN3059	pgmA	Putative phosphoglycerate mutase with a predicted role in gluconeogenesis and glycolysis; expression upregulated after exposure to farnesol	Phosphoglycerate mutase		-0.877411	-2.71483	-2.25882
AN5746	acuN	Putative phosphopyruvate hydratase with a predicted role in gluconeogenesis and glycolysis; intracellular; protein abundance decreased by menadione stress; protein induced by farnesol	Phosphopyruvate hydratase		-1.37322	-2.50111	-2.76238		1
AN5210	pkiA	Putative pyruvate kinase with a predicted role in gluconeogenesis and glycolysis; intracellular, menadione stress-induced protein	Pyruvate kinase		-1.24849	-1.73848	-1.5817		1
AN10844	fbpZ	Putative fructose-2,6-bisphosphate 2-phosphatase	Fructose-2,6-bisphosphate 2-phosphatase		-0.199861	-0.519344	0.15131
AN5144	pfkZ	Putative 6-phosphofructo-2-kinase with a predicted role in mannose/mannitol, fructose, and sorbose/sorbitol metabolism	6-Phosphofructo 2-kinase		-1.61932	-2.90996	-2.69262		1
			Number of upregulated genes in the group:		0	0	0		7	0	0	0
			Number of downregulated genes in the group:		8	12	12		0	0	0	0
			Number of genes in the group:		16	16	16		16	16	16	16
			Total number of upregulated genes:		1749	2159	2371		918	286	322	433
			Total number of downregulated genes:		1270	1705	1960		1193	69	148	203
			Total number of genes:		10867	10867	10867		10867	10867	10867	10867
			p value for the upregulated genes:		1	1	1		0.0001738	1	1	1
			p value for the downregulated genes:		0.0001844	2.107e-07	1.018e-06		1	1	1	1
TCA cycle genes
GENEID	Gene namea	Featurea	Descriptionb		log2FC values				Regulation (up=1, down=-1)
					Lactose containing cultures	Arabinogalactan containing cultures	Carbon starved cultures		Culture specific gene
					vs.	vs.	vs.		Glucose	Lactose	Arabinogalactan	No carbon source
					Glucose containing cultures	Glucose containing cultures	Glucose containing cultures
AN5162	pdhB	Putative pyruvate dehydrogenase (lipoamide) with a predicted role in pyruvate metabolism	Pyruvate dehydrogenase complex		-0.779019	-1.37663	-1.6308
AN9403	pdhC	Putative pyruvate dehydrogenase (lipoamide) with a predicted role in pyruvate metabolism	Pyruvate dehydrogenase complex		-0.655858	-1.37317	-1.58895
AN6708	pdhA	Putative dihydrolipoamide S-acetyltransferase with a predicted role in pyruvate metabolism	Pyruvate dehydrogenase complex		-0.895733	-1.44111	-2.09011
AN2964	pdhX	Putative pyruvate dehydrogenase complex component	Pyruvate dehydrogenase complex		-0.480637	-0.980427	-1.39388
AN8275	citA	Mitochondrial citrate synthase with a predicted role in the TCA cycle	Citrate synthase		-1.85942	-2.64535	-3.51098		1
AN10973		Putative citrate synthase	Citrate synthase		1.2526	-0.978881	0.662959
AN5300		Putative aconitate hydratase with a predicted role in the TCA cycle	Aconitase		0.64251	0.877447	0.90767
AN3894		Putative aconitate hydratase with a predicted role in the TCA cycle	Aconitase		-1.30493	-1.27295	-2.40151		1			-1
AN5525	acoA	Putative aconitate hydratase with a predicted role in the TCA cycle; intracellular; protein abundance decreased by menadione stress; protein expressed at increased levels in a hapX mutant versus wild-type	Aconitase		-0.0617348	-0.361637	-0.710455
AN5790		Putative isocitrate dehydrogenase (NAD+) with a predicted role in the TCA cycle	Isocitrate dehydrogenase (NAD+)		-0.806581	-1.19838	-0.40947
AN1003		Putative isocitrate dehydrogenase (NAD+) with a predicted role in the TCA cycle; intracellular, menadione stress-induced protein	Isocitrate dehydrogenase (NAD+)		-0.888456	-1.20161	-1.27046
AN2999	idpA	Putative isocitrate dehydrogenase (NADP+) with a predicted role in the TCA cycle; regulated by carbon source; alternative transcription start sites specify mitochondrial or cytoplasmic and peroxisomal protein localization	Isocitrate dehydrogenase (NADP+)		-0.358321	0.515225	-0.0572716
AN3466	kgdB	Putative dihydrolipoamide S-succinyl transferase with a predicted role in the TCA cycle	a-ketoglutarate dehydrogenase		-0.77027	-1.01971	-1.25552
AN5571	kgdA	Putative oxoglutarate dehydrogenase (lipoamide) with a predicted role in the TCA cycle	a-ketoglutarate dehydrogenase		-0.389263	-0.301764	-0.241886
AN7000		Putative succinate-CoA ligase (ADP-forming) with a predicted role in the TCA cycle	Succinate-CoA ligase		-0.377127	-0.383912	-0.517137
AN2295		Putative succinate-CoA ligase (GDP-forming) with a predicted role in the TCA cycle	Succinate-CoA ligase		-0.932032	-0.998011	-1.11399
AN1193		Putative succinate-CoA ligase (GDP-forming), alpha chain	Succinate-CoA ligase		0.657039	0.285351	0.808833
AN2916		Putative succinate dehydrogenase with a predicted role in the TCA cycle	Succinate dehydrogenase		-0.719358	-0.583055	-0.793061
AN8793	carC	Putative succinate dehydrogenase (ubiquinone) with a predicted role in the TCA cycle; palA-dependent expression independent of pH	Succinate dehydrogenase		-0.344081	-0.213319	-0.377814
AN2332		Putative succinate dehydrogenase with a predicted role in the TCA cycle	Succinate dehydrogenase		-0.721085	-0.507351	-0.911614
AN0896		Putative succinate dehydrogenase	Succinate dehydrogenase		-0.404934	-0.17356	-0.500195
AN1543		Putative succinate dehydrogenase	Succinate dehydrogenase		0.233192	0.737494	0.695193
AN6133		Putative succinate dehydrogenase	Succinate dehydrogenase		1.41104	2.13145	3.08529		-1
AN8707		Putative fumarate dehydratase with a predicted role in the TCA cycle	Fumarate hydratase		-0.417183	-0.914852	-1.16781
AN5718		Putative fumarate hydratase	Fumarate hydratase		-0.305372	-0.573036	-0.303072
AN6499	mdhC	Putative malate dehydrogenase with a predicted role in the methylglyoxal bypass or the TCA cycle; intracellular; protein abundance decreased by menadione stress	Malate dehydrogenase		0.509026	0.139522	-0.064918
AN6717	mdhA	Putative mitochondrial malate dehydrogenase with a predicted role in the TCA cycle; intracellular; protein abundance decreased by menadione stress	Malate dehydrogenase		-1.15352	-1.57273	-1.88747		1
AN7633		Putative malate dehydrogenase	Malate dehydrogenase		0.072557	0.0319825	0.429203
AN9053		Putative malate dehydrogenase	Malate dehydrogenase		0.573641	0.395167	0.855591
AN5031	mdhB	Putative malate dehydrogenase with a predicted role in the methylglyoxal bypass or the TCA cycle	Malate dehydrogenase		0	2.59869	2.45461
			Number of upregulated genes in the group:		2	1	1		3	0	0	0
			Number of downregulated genes in the group:		3	9	11		1	0	0	1
			Number of genes in the group:		30	30	30		30	30	30	30
			Total number of upregulated genes:		1749	2159	2371		918	286	322	433
			Total number of downregulated genes:		1270	1705	1960		1193	69	148	203
			Total number of genes:		10867	10867	10867		10867	10867	10867	10867
			p value for the upregulated genes:		0.9652	0.9987	0.9994		0.4711	1	1	1
			p value for the downregulated genes:		0.6979	0.03583	0.01212		0.9696	1	1	0.4325
Autophagy genes
GENEID	Gene namea	Featurea	Descriptionb		log2FC values				Regulation (up=1, down=-1)
					Lactose containing cultures	Arabinogalactan containing cultures	Carbon starved cultures		Culture specific gene
					vs.	vs.	vs.		Glucose	Lactose	Arabinogalactan	No carbon source
					Glucose containing cultures	Glucose containing cultures	Glucose containing cultures
AN0090		Ortholog of A. fumigatus Af293 : Afu5g12120, A. niger CBS 513.88 : An18g02220/atg16, Aspergillus wentii : Aspwe1_0170744, Aspergillus sydowii : Aspsy1_0040537 and Aspergillus terreus NIH2624 : ATET_02061	Atg16		0.33435	0.602209	0.717855
AN0127		Ortholog(s) have phosphatidylinositol-3,5-bisphosphate binding, phosphatidylinositol-3-phosphate binding, phosphatidylinositol-4-phosphate binding, ubiquitin binding activity	Atg18		0.296705	0.76231	0.909992
AN0861		Ortholog of A. fumigatus Af293 : Afu1g15250, A. oryzae RIB40 : AO090005001206, Aspergillus wentii : Aspwe1_0051149, Aspergillus sydowii : Aspsy1_0122516 and Aspergillus terreus NIH2624 : ATET_00827	Atg27		-0.0091591	0.29451	1.15542
AN10728		Ortholog of Aspergillus versicolor : Aspve1_0084438, Aspergillus zonatus : Aspzo1_1674623, Aspergillus sydowii : Aspsy1_0056919 and Aspergillus carbonarius ITEM 5010 : Acar5010_128637, Acar5010_128669	Atg10		0.363702	1.17986	1.06384
AN11004		Ortholog(s) have Atg8 ligase activity	Atg3		0.151143	0.371667	0.717553
AN1632	atg1	Ortholog(s) have protein serine/threonine kinase activity	Atg1		0.0645686	-0.0966234	0.208374
AN1701		Ortholog of A. fumigatus Af293 : Afu4g08470, A. niger CBS 513.88 : An04g03260/atg28, A. oryzae RIB40 : AO090023000715, Aspergillus wentii : Aspwe1_0034455 and Aspergillus sydowii : Aspsy1_0038734	Atg28		-0.143582	-0.111803	0.338787
AN1760		Ortholog(s) have role in autophagy, macroautophagy	Atg12		-0.164017	-0.267217	0.0293664
AN2076		Ortholog(s) have role in autophagy, autophagy of mitochondrion, macroautophagy, protein secretion and phagophore assembly site localization	Atg13		0.618995	0.818793	1.72332
AN2876		Ortholog of A. nidulans FGSC A4 : AN5876, A. fumigatus Af293 : Afu2g11370, Afu3g11770, Aspergillus wentii : Aspwe1_0653753 and Aspergillus sydowii : Aspsy1_0146596, Aspsy1_1176317	Atg22B2		1.30091	3.22327	4.08897		-1
AN2887		Ortholog(s) have role in autophagy of mitochondrion	Atg11		0.499291	0.671889	1.36037
AN3470		Ortholog(s) have Atg8-specific protease activity	Atg4		0.487702	0.684962	1.11277
AN3584		Ortholog(s) have phosphatidylinositol-3-phosphate binding activity	Atg24		0.0968313	-0.0583168	0.15152
AN3734		Possible pseudogene, similar to autophagy-related protein	Atg9		-0.092623	0.80471	1.78743
AN4601		Ortholog(s) have sterol 3-beta-glucosyltransferase activity and role in ascospore-type prospore membrane assembly, sterol metabolic process	Atg26		0.502441	0.401962	0.9984
AN4832		Ortholog of A. fumigatus Af293 : Afu3g07240, A. niger CBS 513.88 : An02g13480/atg29, A. oryzae RIB40 : AO090020000200, Aspergillus wentii : Aspwe1_0042020 and Aspergillus sydowii : Aspsy1_0148063	Atg29		-0.28097	-0.406373	-0.278462
AN5131	atgH	Ortholog(s) have phosphatidylethanolamine binding, protein tag activity	Atg8		0.332172	0.674464	1.02263
AN5174		Ortholog(s) have Atg8 ligase activity, enzyme activator activity	Atg5		-0.33864	-0.365255	-0.0816964
AN5491		Ortholog(s) have phosphatidylinositol-3-phosphate binding activity	Atg2		0.539246	0.962535	1.21833
AN5876		Ortholog of A. nidulans FGSC A4 : AN2876, A. fumigatus Af293 : Afu2g11370, Afu3g11770, Aspergillus wentii : Aspwe1_0653753 and Aspergillus sydowii : Aspsy1_0146596, Aspsy1_1176317	Atg22B1		0.655121	0.714168	0.697939
AN5919		Ortholog(s) have phospholipase activity	Atg15		0.621305	1.10646	1.32941
AN6351		Ortholog(s) have phosphatidylinositol-3-phosphate binding activity and role in autophagy of mitochondrion, cytoplasm to vacuole transport by the Cvt pathway, early endosome to Golgi transport, macroautophagy	Atg20		0.516187	0.481752	0.819212
AN6360		Has domain(s) with predicted role in autophagy	Atg17		0.0465283	0.311762	0.302837
AN7428		Ortholog(s) have role in autophagy, macroautophagy	Atg7		-0.0969619	0.460659	0.724144
AN7437		Ortholog(s) have L-amino acid transmembrane transporter activity and role in L-alpha-amino acid transmembrane transport, amino acid transmembrane export from vacuole	Atg22A1		0.071892	0.0752879	0.161471
AN7591		Ortholog of A. nidulans FGSC A4 : AN7437, A. fumigatus Af293 : Afu2g06170, Afu2g15370, A. niger CBS 513.88 : An09g03630, An02g14810/atg22 and A. oryzae RIB40 : AO090012000289, AO090001000734	Atg22A2		0.263673	0.152093	0.140756
			Number of upregulated genes in the group:		1	3	10		0	0	0	0
			Number of downregulated genes in the group:		0	0	0		1	0	0	0
			Number of genes in the group:		26	26	26		26	26	26	26
			Total number of upregulated genes:		1749	2159	2371		918	286	322	433
			Total number of downregulated genes:		1270	1705	1960		1193	69	148	203
			Total number of genes:		10867	10867	10867		10867	10867	10867	10867
			p value for the upregulated genes:		0.9896	0.9137	0.0404		1	1	1	1
			p value for the downregulated genes:		1	1	1		0.9515	1	1	1
Cell wall genes
GENEID	Gene namea	Featurea	Descriptionb		log2FC values				Regulation (up=1, down=-1)
					Lactose containing cultures	Arabinogalactan containing cultures	Carbon starved cultures		Culture specific gene
					vs.	vs.	vs.		Glucose	Lactose	Arabinogalactan	No carbon source
					Glucose containing cultures	Glucose containing cultures	Glucose containing cultures
AN5885	agsA	Catalytic subunit of alpha-1,3 glucan synthase complex; plays a minor role in alpha-1,3 glucan synthesis compared to AgsB; locus contains the conserved upstream open reading frame (uORF) AN5885-uORF	1,3-alfa-glucan synthase	Synthases, transglycosylases and regulatory proteins	2.60184	4.98567	2.06378		-1		1
AN3307	agsB	Catalytic subunit of the major alpha-1,3 glucan synthase complex; mutants grow as dispersed hyphae in liquid culture	1,3-alfa-glucan synthase	Synthases, transglycosylases and regulatory proteins	-0.817878	-6.07355	-6.47799
AN8444	celA	Protein with similarity to cellulose synthase; predicted role in beta-glucan synthesis	1,3-beta-/1,4-beta-glucan synthesis	Synthases, transglycosylases and regulatory proteins	-2.70628	0.107419	-1.15897			-1
AN10779		Putative transglycosidase required for 1,6-beta-glucan biosynthesis	transglycosidase; 1,6-beta-glucan biosynthesis	Synthases, transglycosylases and regulatory proteins	-1.31118	-2.71657	-2.27888		1
AN5740	rhoA	Protein with similarity to Saccharomyces cerevisiae Rho family GTPase Rho1p; involved in polar growth, hyphal branching, and cell wall synthesis	1,3-beta-glucan synthase complex	Synthases, transglycosylases and regulatory proteins	0.166631	0.110321	0.228816
AN3729	fksA	Putative 1,3-beta-glucan synthase with a predicted role in glucan biosynthesis	1,3-beta-glucan synthase complex	Synthases, transglycosylases and regulatory proteins	-0.435811	-1.1072	-0.935127
AN8846	gsaA	Putative 1,3-beta-glucan synthase with a predicted role in glucan biosynthesis; this locus is reported to contain an upstream open reading frame (uORF)	1,3-beta-glucan synthase complex	Synthases, transglycosylases and regulatory proteins	-0.574785	-0.746228	-0.71044
AN4700	btgC	Protein with endo-beta-(1,3)-glucanase activity, involved in degradation of glucans	1,3-beta-transglucosylases; connects the emerging 1,3-beta-glucan chains to the existing beta-glucan network	Synthases, transglycosylases and regulatory proteins	-0.179453	-0.853065	-0.192425
AN10150	btgA	Putative 1,3-beta-transglucosylase with a predicted role in glucan processing	1,3-beta-transglucosylases; connects the emerging 1,3-beta-glucan chains to the existing beta-glucan network	Synthases, transglycosylases and regulatory proteins	-0.272335	0.115013	0.025683
AN3727	btgD	Putative 1,3-beta-transglucosylase with a predicted role in glucan processing	1,3-beta-transglucosylases; connects the emerging 1,3-beta-glucan chains to the existing beta-glucan network	Synthases, transglycosylases and regulatory proteins	0.444888	-0.115002	0.871779
AN3730	gelC	Putative 1,3-beta-transglycosidase with a predicted role in glucan processing	1,3-beta-transglucosylases; connects the emerging 1,3-beta-glucan chains to the existing beta-glucan network	Synthases, transglycosylases and regulatory proteins	-1.36168	-2.27283	-2.13985		1
AN7511	gelE	Putative 1,3-beta-transglycosidase with a predicted role in glucan processing; predicted glycosyl phosphatidylinositol (GPI)-anchor	1,3-beta-transglucosylases; connects the emerging 1,3-beta-glucan chains to the existing beta-glucan network	Synthases, transglycosylases and regulatory proteins	-1.64752	-2.04523	-2.55905		1
AN0558	gelB	Putative 1,3-beta-transglycosidase with a predicted role in glucan processing; predicted glycosyl phosphatidylinositol (GPI)-anchor	1,3-beta-transglucosylases; connects the emerging 1,3-beta-glucan chains to the existing beta-glucan network	Synthases, transglycosylases and regulatory proteins	0.158371	1.0185	0.430564
AN7657	gelA	Putative 1,3-beta-transglycosidase with a predicted role in glucan processing; predicted glycosyl phosphatidylinositol (GPI)-anchor; palA-dependent expression independent of pH	1,3-beta-transglucosylases; connects the emerging 1,3-beta-glucan chains to the existing beta-glucan network	Synthases, transglycosylases and regulatory proteins	-1.24505	-1.55914	-1.87498		1
AN11152	gelD	Putative 1,3-beta-transglycosidase with a predicted role in glucan processing; predicted glycosylphosphatidylinositol (GPI)-anchored protein	1,3-beta-transglucosylases; connects the emerging 1,3-beta-glucan chains to the existing beta-glucan network	Synthases, transglycosylases and regulatory proteins	-2.04638	-1.57244	-0.666451
AN1551	btgE	Putative beta-glucosidase with predicted role in degradation of glucans; covalently bound cell wall protein	1,3-beta-transglucosylases; connects the emerging 1,3-beta-glucan chains to the existing beta-glucan network	Synthases, transglycosylases and regulatory proteins	-1.17926	-0.932695	-1.40029
AN3053	crhD	Putative transglycosidase with a predicted role in glucan processing	transglycosidases; crosslinks beta-glucan and chitin	Synthases, transglycosylases and regulatory proteins	-0.519223	-1.04432	-1.68191
AN3914	crhA	Putative transglycosidase with a predicted role in glucan processing	transglycosidases; crosslinks beta-glucan and chitin	Synthases, transglycosylases and regulatory proteins	-0.256634	-1.30104	-1.84258
AN6948	crhE	Putative transglycosidase with a predicted role in glucan processing	transglycosidases; crosslinks beta-glucan and chitin	Synthases, transglycosylases and regulatory proteins	0.642205	-0.357233	-0.949029
AN4515	crhB	Putative transglycosidase with a predicted role in glucan processing; predicted glycosyl phosphatidylinositol (GPI)-anchor	transglycosidases; crosslinks beta-glucan and chitin	Synthases, transglycosylases and regulatory proteins	-2.68378	-3.62569	-3.71214		1
AN0933	crhC	Putative transglycosidase with a predicted role in glucan processing; predicted glycosyl phosphatidylinositol (GPI)-anchor	transglycosidases; crosslinks beta-glucan and chitin	Synthases, transglycosylases and regulatory proteins	-0.821406	-1.07072	-0.296459
AN4566	chsC	Class I chitin synthase with a role in chitin biosynthesis; involved with ChsA in septum formation and conidiation; protein expressed at high levels in young cleistothecia and in mature ascospores	Chitin synthase	Synthases, transglycosylases and regulatory proteins	0.435734	0.596509	0.441644
AN7032	chsA	Class II chitin synthase with a role in chitin biosynthesis; involved with ChsC in septum formation and conidiation; transcript induced during asexual development; protein localizes to conidiophores	Chitin synthase	Synthases, transglycosylases and regulatory proteins	-0.308134	-0.936215	-1.45369
AN2523	chsB	Class III chitin synthase with a role in chitin biosynthesis; required for normal growth and conidiation; constitutively expressed during vegetative growth, sexual and asexual development	Chitin synthase	Synthases, transglycosylases and regulatory proteins	0.0412056	-0.236904	0.11314
AN1555	chsD	Class IV chitin synthase involved in chitin biosynthesis	Chitin synthase	Synthases, transglycosylases and regulatory proteins	0.0307354	-0.129511	0.176251
AN6318	csmA	Class V chitin synthase with a role in chitin biosynthesis; involved in hyphal tip growth; contains a myosin-like domain; mutation is synthetically lethal with csmB mutation; localized at hyphal tips and septa	Chitin synthase	Synthases, transglycosylases and regulatory proteins	-0.465182	-0.951891	-1.28733
AN6317	csmB	Class VI chitin synthase with a role in chitin biosynthesis; involved in hyphal tip growth; contains a myosin-like domain; mutation is synthetically lethal with csmA mutation; localized at hyphal tips and septa	Chitin synthase	Synthases, transglycosylases and regulatory proteins	-0.375752	-0.844148	-1.08272
AN0799		Has domain(s) with predicted chitin synthase activity and role in chitin biosynthetic process	Chitin synthase	Synthases, transglycosylases and regulatory proteins	2.06134	-0.554586	0.335275			1
AN4367	chsF	Putative chitin synthase III with a predicted role in chitin biosynthesis; transcript is induced by nitrate	Chitin synthase	Synthases, transglycosylases and regulatory proteins	-0.429147	-2.96151	-2.55039
AN1046	chsG	Putative class VII chitin synthase with a predicted role in chitin biosynthesis	Chitin synthase	Synthases, transglycosylases and regulatory proteins	1.15757	2.20706	1.62442		-1
AN8710		Ortholog of A. fumigatus Af293 : Afu6g02510, A. niger CBS 513.88 : An12g07880, A. oryzae RIB40 : AO090120000136, Aspergillus wentii : Aspwe1_0103156 and Aspergillus sydowii : Aspsy1_0392745	Regulation of chitin synthase activity	Synthases, transglycosylases and regulatory proteins	-0.10654	-0.179706	-0.0955081
AN1069		Ortholog(s) have unfolded protein binding activity	Regulation of chitin synthase activity	Synthases, transglycosylases and regulatory proteins	-0.239603	-0.42312	-0.520232
AN3445		Protein with a predicted role in the regulation of chitin synthase activity	Regulation of chitin synthase activity	Synthases, transglycosylases and regulatory proteins	0.590788	0.229305	0.530363
AN8765		Protein with a predicted role in the regulation of chitin synthase activity	Regulation of chitin synthase activity	Synthases, transglycosylases and regulatory proteins	0.59837	0.399423	0.940545
AN1554		Protein with a predicted role in the regulation of chitin synthase activity	Regulation of chitin synthase activity	Synthases, transglycosylases and regulatory proteins	0.505552	0.612587	0.554021
AN3122		Transcript levels increase during the unfolded-protein response (UPR); S. cerevisiae ortholog of Bch1p	Regulation of chitin synthase activity	Synthases, transglycosylases and regulatory proteins	-0.412158	-0.62979	-0.394868
AN7349	mutA	Protein with alpha-1,3-glucanase (mutanase) activity, involved in carbohydrate catabolism; highly expressed during sexual development, specifically expressed in Hulle cells	1,3-alfa-glucanase	Hydrolases	0.638562	7.05923	11.1993					1
AN3790	agnB	Putative alpha-1,3-glucanase	1,3-alfa-glucanase	Hydrolases	2.01381	1.83462	5.76345		-1			1
AN11064	agnD	Putative alpha-1,3-glucanase	1,3-alfa-glucanase	Hydrolases	0.858202	1.86969	1.04693
AN9042	agnC	Putative alpha-1,3-glucanase	1,3-alfa-glucanase	Hydrolases	0.284613	7.17732	10.5307					1
AN1604	agnE	Putative alpha-1,3-glucanase; predicted glycosyl phosphatidylinositol (GPI)-anchor	1,3-alfa-glucanase	Hydrolases	2.21288	4.31766	0.986457				1
AN3309	amyG	Putative alpha-amylase with a predicted role in starch metabolism	amylase	Hydrolases	-0.154113	-2.22525	-1.23233
AN2018	amyA	Putative alpha-amylase with a predicted role in starch metabolism	Amylase-like family	Hydrolases	-0.622323	0.447413	0.415579
AN3308	amyD	Putative alpha-amylase with a predicted role in starch metabolism; predicted glycosyl phosphatidylinositol (GPI)-anchor	Amylase-like family	Hydrolases	-1.89504	-4.97052	-4.14422		1
AN4507	amyC	Putative alpha-amylase with a predicted role in starch metabolism; predicted glycosyl phosphatidylinositol (GPI)-anchor	Amylase-like family	Hydrolases	3.04512	-0.18121	0.118315			1
AN6324	amyE	Putative alpha-amylase with a predicted role in starch metabolism; predicted glycosylphosphatidylinositol (GPI)-anchored protein	Amylase-like family	Hydrolases	0.0332831	0.953138	1.23681
AN3388	amyF	Putative alpha-amylase with a predicted role in starch metabolism; transcriptionally induced by isomaltose in an amyR-dependent manner	Amylase-like family	Hydrolases	0.507219	1.73891	2.50351
AN3402	amyB	Putative alpha-amylase with a predicted role in starch metabolism; transcriptionally induced by isomaltose in an amyR-dependent manner	Amylase-like family	Hydrolases	-3.02698	3.16399	4.41522			-1		1
AN0472	engA	Putative 1,3-beta-glucosidase with a role in carbon starvation-induced autolytic cell wall degradation	endo-1,3-beta-glucanase	Hydrolases	-0.21263	3.64757	5.82189					1
AN3777	exgB	Protein with beta-(1,6)-glucanase activity, involved in degradation of glucans	exo-1,3-beta-glucanase	Hydrolases	0.589514	0.974716	1.03746
AN7533	exgD	Protein with exo-beta-(1,3)-glucanase activity, involved in degradation of glucans	exo-1,3-beta-glucanase	Hydrolases	-0.215225	-0.230448	-0.351919
AN7869		Putative exo-1,3-beta glucanase family protein	exo-1,3-beta-glucanase	Hydrolases	0.350472	2.42278	2.13588
AN1332	exgA	Putative exo-1,3-beta-glucanase family protein	exo-1,3-beta-glucanase	Hydrolases	-0.255413	0.684182	1.1246
AN8947	exgE	Putative exo-1,3-beta-glucanase with a predicted role in glucan processing	exo-1,3-beta-glucanase	Hydrolases	2.08334	2.31283	0.589106
AN0779		Putative glucan 1,3-beta-glucosidase with a predicted role in glucan metabolism	exo-1,3-beta-glucanase	Hydrolases	0.0697236	0.665673	2.37747					1
AN8480		Putative glucan 1,3-beta-glucosidase with a predicted role in glucan metabolism	exo-1,3-beta-glucanase	Hydrolases	-4.41989	0.197932	-3.34269
AN4852		Putative glucan 1,3-beta-glucosidase with a predicted role in glucan metabolism	exo-1,3-beta-glucanase	Hydrolases	-2.81906	-4.95218	-4.9346		1
AN4825		Putative glucan 1,3-beta-glucosidase with a predicted role in glucan metabolism	exo-1,3-beta-glucanase	Hydrolases	2.23223	8.12401	9.33694		-1			1
AN4052	exgC	Putative glucan 1,3-beta-glucosidase with a predicted role in glucan metabolism	exo-1,3-beta-glucanase	Hydrolases	-0.534468	-0.640325	1.20777					1
AN0550		Putative glucan 1,3-beta-glucosidase with a predicted role in glucan metabolism	exo-1,3-beta-glucanase	Hydrolases	-2.32341	-1.39942	-3.93023		1
AN7950	eglC	Putative glucan endo-1,3-beta-D-glucosidase with predicted role in degradation of glucans; glycosyl phosphatidylinositol (GPI)-linked protein	exo-1,3-beta-glucanase	Biosynthesis	-1.97102	-3.81498	-3.58781		1
AN2385	xgeA	Protein with licheninase activity, involved in degradation of glucans: predicted glycosyl phosphatidylinositol (GPI)-anchor	Mixed-linked beta-glucanase	Hydrolases	-1.00197	-1.85253	-1.94349		1
AN0452		Protein with xyloglucan-specific endoglucanase activity, involved in degradation of xyloglucans; predicted role in cellulose metabolism	Mixed-linked beta-glucanase	Hydrolases	-0.682287	-0.167612	-0.205035
AN0245		Putative glucanase with a predicted role beta-glucan hydrolysis	Mixed-linked beta-glucanase	Hydrolases	0.371435	3.23323	5.7603					1
AN3883		Putative glucanase with a predicted role beta-glucan hydrolysis	Mixed-linked beta-glucanase	Hydrolases	0.282795	-0.25323	-0.961417
AN6697	sunA	Putative Sun-family protein	beta-glucosidase	Hydrolases	-1.14436	-1.29166	-1.46684		1
AN0726	sunB	Putative Sun-family protein; predicted glycosyl phosphatidylinositol (GPI)-anchor	beta-glucosidase	Hydrolases	-1.91802	-2.05936	-2.32107		1
AN4504	dfgG	Putative endo-mannanase GH76 family protein	Endo-mannanase	Hydrolases	0.319536	1.49496	2.52989					1
AN10345	dfgA	Putative endo-mannanase GH76 family protein	Endo-mannanase	Hydrolases	3.79887	4.76541	4.04438		-1
AN6472	dfgF	Putative endo-mannanase GH76 family protein	Endo-mannanase	Hydrolases	-4.9563	-0.768021	-4.15866
AN0393	dfgC	Putative endo-mannanase GH76 family protein; predicted type I transmembrane protein	Endo-mannanase	Hydrolases	0.252088	0.436463	0.634781
AN3049	dfgD	Putative endo-mannanase GH76 family protein; predicted type I transmembrane protein	Endo-mannanase	Hydrolases	0.691033	0.213065	-0.0551739
AN8421	dfgB	Putative endo-mannanase GH76 family protein; role in polysaccharide degradation	Endo-mannanase	Hydrolases	-0.420958	-2.49879	-1.1141				-1
AN0383	dfgE	Putative endo-mannanase GH76 family protein; transcript repressed by nitrate	Endo-mannanase	Hydrolases	-0.397613	-0.0394258	-0.536607
AN4871	chiB	Class V chitinase; glycoside hydrolase family 18 (GH18) protein with a role in the age-dependent autolysis	Chitinases	Hydrolases	1.01253	6.86695	8.20175		-1			1
AN8241	chiA	Endochitinase with a predicted role in chitin hydrolysis; glycosylphosphatidylinositol (GPI) anchored protein; modi&#64257;ed by O-linked glycosylation; localized to germination sites, hyphal branch points and regions of polarized growth	Chitinases	Hydrolases	-3.85939	-3.14713	-5.61067		1			-1
AN10838		Has domain(s) with predicted catalytic activity, chitin binding, chitinase activity, hydrolase activity, hydrolyzing O-glycosyl compounds activity	Chitinases	Hydrolases	-2.37777	-4.28318	-4.85232		1
AN11233		Has domain(s) with predicted catalytic activity, chitin binding, chitinase activity, hydrolase activity, hydrolyzing O-glycosyl compounds activity and role in carbohydrate metabolic process, chitin catabolic process	Chitinases	Hydrolases	0.257608	-1.13817	1.78604				-1	1
AN10502		Has domain(s) with predicted catalytic activity, hydrolase activity, hydrolyzing O-glycosyl compounds activity and role in carbohydrate metabolic process	Chitinases	Hydrolases	-0.354499	-0.134342	-1.33446
AN8481		Putative chitinase; glycoside hydrolase family 18 (GH18) protein with a predicted role in chitin	Chitinases	Hydrolases	0.857754	0.960623	1.04817
AN0221		Putative chitinase; glycoside hydrolase family 18 (GH18) protein with a predicted role in chitin hydrolysis	Chitinases	Hydrolases	1.35518	1.40955	1.43074		-1
AN0517		Putative chitinase; glycoside hydrolase family 18 (GH18) protein with a predicted role in chitin hydrolysis	Chitinases	Hydrolases	-2.90336	-1.41388	-1.64582		1	-1
AN0299		Putative chitinase; glycoside hydrolase family 18 (GH18) protein with a predicted role in chitin hydrolysis	Chitinases	Hydrolases	0.614167	0.718163	0.681804
AN11059		Putative chitinase; glycoside hydrolase family 18 (GH18) protein with a predicted role in chitin hydrolysis	Chitinases	Hydrolases	1.66412	1.29308	2.01995		-1
AN0549		Putative chitinase; glycoside hydrolase family 18 (GH18) protein with a predicted role in chitin hydrolysis	Chitinases	Hydrolases	-5.11219	-5.22432	-5.46055		1
AN0509		Putative chitinase; glycoside hydrolase family 18 (GH18) protein with a predicted role in chitin hydrolysis	Chitinases	Hydrolases	0.239826	-0.14467	1.1056
AN7613		Putative chitinase; glycoside hydrolase family 18 (GH18) protein with a predicted role in chitin hydrolysis	Chitinases	Hydrolases	1.76684	1.90792	3.38295		-1			1
AN0541		Putative chitinase; glycoside hydrolase family 18 (GH18) protein with a predicted role in chitin hydrolysis	Chitinases	Hydrolases	4.0954	2.18305	4.02621		-1
AN11063		Putative Class III chitinase	Chitinases	Hydrolases	0.267296	0.345552	-0.224716
AN7886		Putative class V chitinase; glycoside hydrolase family 18 (GH18) protein with a predicted role in chitin hydrolysis	Chitinases	Hydrolases	-0.313159	-1.11597	-1.30143
AN5454		Putative class V chitinase; glycoside hydrolase family 18 (GH18) protein with a predicted role in chitin hydrolysis	Chitinases	Hydrolases	8.28992	5.30914	6.61459		-1	1
AN9390	chiC	Putative endochitinase; glycoside hydrolase family 18 (GH18) protein with a predicted role in chitin hydrolysis	Chitinases	Hydrolases	1.10002	4.11618	4.64271		-1
AN1502	nagA	Extracellular N-acetyl-beta-glucosaminidase with a predicted role in chitin hydrolysis	N-acetyl-beta-D-glucosaminidase	Hydrolases	0.488845	5.39675	4.48929
AN4696		Ortholog of A. fumigatus Af293 : Afu5g08820, A. niger CBS 513.88 : An07g04590, A. oryzae RIB40 : AO090020000448, Aspergillus wentii : Aspwe1_0023715 and Aspergillus sydowii : Aspsy1_0033180	Chitosanase	Hydrolases	-0.86304	-1.38122	-1.15508
AN11051		Putative GH 75 family chitosanase	Chitosanase	Hydrolases	-0.301528	-0.485314	-1.15451
AN1852		Putative chitin deacetylase	Chitin deacetylases	Hydrolases	1.86219	0.209916	0.838278			1
AN4823		Putative chitin deacetylase	Chitin deacetylases	Hydrolases	-0.15052	0.728939	1.85026					1
AN9380		Putative chitin deacetylase; catalyzes the conversion of chitin to chitosan by the deacetylation of N-acetyl-D-glucosamine residues	Chitin deacetylases	Hydrolases	1.81213	4.20086	0.637581				1
AN10309		Putative chitin deacetylase; predicted glycosyl phosphatidylinositol (GPI)-anchor	Chitin deacetylases	Hydrolases	0.541587	0.805672	0.785687
AN6927	wscB	Putative plasma membrane sensor-transducer; N- and O- glycosylated and localized in the cell wall and membrane	Putative PM sensor-transducer	Cell wall integrity pathway genes	-0.507903	-0.19229	-0.379504
AN5660	wscA	Putative plasma membrane sensor-transducer; N- and O- glycosylated and localized in the cell wall and membrane; mutants display a high frequency of swollen hyphae under hypo-osmotic conditions; required for conidiation	Putative PM sensor-transducer	Cell wall integrity pathway genes	-0.349613	-0.56604	-0.395872
AN5666	mpkA	Putative mitogen-activated protein kinase (MAP kinase) involved in conidial germination and polarized growth; mutants arrest as branched germlings, phenotype is remediated by sucrose and NaCl; reduced growth on AVICEL medium	MAPK	Cell wall integrity pathway genes	-0.0510035	-0.285251	0.0369084
AN4189	mkkA	Essential mitogen-activated protein kinase kinase (MAPKK); mutants arrest as branched germlings, but the phenotype is remediated by NaCl or sucrose	MAPKK	Cell wall integrity pathway genes	0.750569	0.667584	0.744767
AN4887	bckA	Putative mitogen-activated protein kinase kinase kinase (MAPKKK); inviable mutant arrests as branched germlings, remediated by NaCl or sucrose	MAPKKK	Cell wall integrity pathway genes	0.0710716	0.0810224	-0.0883857
AN0106	pkcA	Protein kinase C; essential gene; required for wild-type level of growth, cell wall integrity and penicillin biosynthesis	Protein kinase C	Cell wall integrity pathway genes	0.342647	0.364717	0.403929
AN8676	mcmA	Putative MADS-box family transcription factor; ORF that was absent from the original release of version 4 of the A. nidulans annotation, but present in a previous version; reinstated into version 4 in AspGD as of July 2009	MADS-betaox transcription factor	Cell wall integrity pathway genes	0.145095	0.142129	-0.219528
AN2984	rlmA	Putative MADS-box family transcription factor; regulates cell wall hydrolase gene expression and autolysis; mutants have abnormal conidiophores arrested at metula formation	Cell wall stress transcription factor	Cell wall integrity pathway genes	0.160958	-0.699126	-0.115686
AN1418		Ortholog(s) have glucosamine-6-phosphate deaminase activity		N-acetylglucosamine utilization	-0.692107	3.37497	3.7486
AN1428		Ortholog(s) have N-acetylglucosamine-6-phosphate deacetylase activity		N-acetylglucosamine utilization	0.845876	4.27025	4.28859
AN1427		Ortholog(s) have N-acetylglucosamine transmembrane transporter activity, role in N-acetylglucosamine transport and plasma membrane localization		N-acetylglucosamine utilization	0.570004	4.99306	4.73517
AN8706	gnaA	Putative glucosamine-phosphate N-acetyltransferase with a predicted role in chitin biosynthesis	Glucosamine-phosphate N-acetyltransferase	UDP-N-acetylglucosamine synthesis	-0.0529654	0.105612	0.510828
AN10709	gfaA	Putative glutamine-fructose-6-phosphate transaminase	Glutamine-fructose-6-phosphate transaminase	UDP-N-acetylglucosamine synthesis	-0.942415	-1.44186	-2.13247
AN4234	pcmA	Putative phosphoacetylglucosamine mutase with a predicted role in chitin biosynthesis	Phosphoacetylglucosamine mutase	UDP-N-acetylglucosamine synthesis	0.00992171	-0.275875	0.909652
AN9094	ungA	Putative UDP-N-acetylglucosamine pyrophosphorylase with a predicted role in chitin biosynthesis; menadione stress-induced protein; repressed by and starvation- and rapamycin-induced autophagy	UDP-N-acetylglucosamine pyrophosphorylase	UDP-N-acetylglucosamine synthesis	-0.0602024	-0.00688619	-0.739505
All genes				Number of upregulated genes in the group:	17	28	33		16	4	3	14
				Number of downregulated genes in the group:	22	28	32		12	3	2	1
				Number of genes in the group:	114	114	114		114	114	114	114
				Total number of upregulated genes:	1749	2159	2371		918	286	322	433
				Total number of downregulated genes:	1270	1705	1960		1193	69	148	203
				Total number of genes:	10867	10867	10867		10867	10867	10867	10867
				p value for the upregulated genes:	0.6739	0.1273	0.0443		0.02982	0.3528	0.6614	0.0001685
				p value for the downregulated genes:	0.01186	0.008914	0.005332		0.6064	0.03574	0.4618	0.8848
Synthases, transglycosylases and regulatory proteins				Number of upregulated genes in the group:	3	3	2		5	1	1	0
				Number of downregulated genes in the group:	8	12	14		2	1	0	0
				Number of genes in the group:	36	36	36		36	36	36	36
				Total number of upregulated genes:	1749	2159	2371		918	286	322	433
				Total number of downregulated genes:	1270	1705	1960		1193	69	148	203
				Total number of genes:	10867	10867	10867		10867	10867	10867	10867
				p value for the upregulated genes:	0.9442	0.9834	0.9985		0.1839	0.6178	0.662	1
				p value for the downregulated genes:	0.05231	0.006798	0.002621		0.9177	0.2052	1	1
Hydrolysis				Number of upregulated genes in the group:	14	22	28		11	3	2	14
				Number of downregulated genes in the group:	14	15	17		10	2	2	1
				Number of genes in the group:	63	63	63		63	63	63	63
				Total number of upregulated genes:	1749	2159	2371		918	286	322	433
				Total number of downregulated genes:	1270	1705	1960		1193	69	148	203
				Total number of genes:	10867	10867	10867		10867	10867	10867	10867
				p value for the upregulated genes:	0.1258	0.003674	4.936e-05		0.01549	0.2302	0.5612	1.289e-07
				p value for the downregulated genes:	0.01251	0.05994	0.05076		0.1482	0.06057	0.2117	0.6962
Extracellular peptidase genes
GENEID	Gene namea	Featurea	Descriptionb		log2FC values				Regulation (up=1, down=-1)
					Lactose containing cultures	Arabinogalactan containing cultures	Carbon starved cultures		Culture specific gene
					vs.	vs.	vs.		Glucose	Lactose	Arabinogalactan	No carbon source
					Glucose containing cultures	Glucose containing cultures	Glucose containing cultures
AN0224		Has domain(s) with predicted dipeptidase activity, dipeptidyl-peptidase activity, metalloexopeptidase activity and role in proteolysis			-0.685561	-1.22924	-1.49727
AN0871		Ortholog(s) have GPI-anchor transamidase activity, role in attachment of GPI anchor to protein and GPI-anchor transamidase complex, endoplasmic reticulum membrane localization	cell wall anchored		0.162954	0.463782	0.442361
AN10030		Putative alkaline serine protease; predicted glycosylphosphatidylinositol (GPI)-anchored protein	cell wall anchored		-0.429206	-0.391826	-0.240577
AN10900		Has domain(s) with predicted serine-type peptidase activity and role in proteolysis			2.65835	2.46431	2.27371		-1
AN1320		Has domain(s) with predicted serine-type peptidase activity and role in proteolysis			6.41039	10.0716	7.37864		-1		1
AN1426		Ortholog(s) have serine-type carboxypeptidase activity			1.20011	0.650155	1.61712
AN1573		Putative aspartic-type protease; predicted glycosylphosphatidylinositol (GPI)-anchored protein	cell wall anchored		1.0769	1.98745	1.01633		-1
AN1706		Has domain(s) with predicted peptidase activity and role in proteolysis			0.0908227	0.160807	0.372663
AN2157	pepAa	Putative aspartic endopeptidase			0.994563	1.62728	1.10255
AN2237		Putative carboxypeptidase C; induced by carbon starvation-induced autophagy			-0.572499	-0.813376	0.0512777
AN2366		Putative trypsin-like protease with a role in the proteolytic cleavage of NmrA			0.0591233	1.02064	3.08687					1
AN2555		Ortholog(s) have carboxypeptidase activity, serine-type carboxypeptidase activity			-2.72063	-8.12504	-2.72554		1		-1
AN2572		Putative dipeptidyl-peptidase; transcript upregulated by nitrate limitation			-1.7233	-0.09758	-0.720367			-1
AN2903	pepE	Aspartic protease; protein expressed at decreased levels in a hapX mutant versus wild-type			-0.120014	0.249949	0.568326
AN3321		Has domain(s) with predicted aspartic-type endopeptidase activity and role in proteolysis			-2.74969	-1.02475	-1.49379		1	-1
AN3377		Ortholog(s) have endopeptidase activity, role in proteolysis, zymogen activation and extracellular region localization			0.752349	-0.0530503	1.73472
AN3393	pepI	Protein with similarity to neutral metalloprotease II			-0.357087	-0.183107	1.14598
AN3403		Has domain(s) with predicted metallopeptidase activity			0.00213273	0.743361	-0.890537
AN3583	kpcA	Protein with homology to subtilisin serine proteases; enhanced specificity for cleavage of dibasic peptide sequences			0.133754	0.0413076	-0.012742
AN3959		Has domain(s) with predicted metalloendopeptidase activity, metallopeptidase activity and role in proteolysis			1.08152	1.87306	3.56697		-1			1
AN4286		Has domain(s) with predicted serine-type peptidase activity and role in proteolysis			1.07617	1.38804	1.5963		-1
AN4422	pepAd	Putative aspartic-type endopeptidase; predicted glycosylphosphatidylinositol (GPI)-anchored protein	cell wall anchored		0.0626749	0.0985238	-0.085564
AN5101		Has domain(s) with predicted metallopeptidase activity			-0.161297	0.419411	-0.127628
AN5125		Has domain(s) with predicted identical protein binding, serine-type endopeptidase activity and role in negative regulation of catalytic activity			-0.434936	-0.214396	0.192544
AN5442	cpyA	Putative carboxypeptidase Y			-0.123559	-0.347269	-0.454195
AN5558	prtA	Broad specificity thermostable alkaline protease; extracellular; regulated by nitrogen, carbon and sulfur metabolite repression; transcript repressed by light in developmentally competent mycelia			-0.686862	2.11301	3.02827
AN6119		Has domain(s) with predicted metallocarboxypeptidase activity, zinc ion binding activity and role in proteolysis			0.667801	0.455699	0.37254
AN6426		Has domain(s) with predicted metallopeptidase activity			-1.64686	-2.97824	-1.21386		1		-1
AN6438		Ortholog(s) have dipeptidyl-peptidase activity, exopeptidase activity, peptidase activity and role in proteolysis, proteolysis involved in cellular protein catabolic process			-0.822041	1.83895	1.37231
AN6686		Has domain(s) with predicted aspartic-type endopeptidase activity and role in proteolysis			1.16877	1.52524	1.6085		-1
AN6888	prtB	Putative extracellular aspartic protease (aspergillopepsin)			-0.205879	0.469271	1.01452
AN7035		Has domain(s) with predicted peptidase activity and role in proteolysis			-0.0954556	-0.307904	0.237501
AN7121		Has domain(s) with predicted metallocarboxypeptidase activity, zinc ion binding activity and role in proteolysis			2.23137	7.17184	3.22648		-1		1
AN7201		Ortholog(s) have role in proteolysis			-1.97823	-2.87263	-0.838038
AN7231		Ortholog(s) have serine-type endopeptidase activity and role in proteolysis			-0.227509	0.794531	0.934907
AN7366		Has domain(s) with predicted metallopeptidase activity			1.00378	1.33618	1.75682		-1
AN7515		Ortholog(s) have endopeptidase activity, role in proteolysis, zymogen activation and extracellular region localization			-0.0941414	-0.557354	-0.132482
AN7858		Has domain(s) with predicted aspartic-type endopeptidase activity and role in proteolysis			0.199924	3.88465	0.210696				1
AN7962	pepJ	Extracellular deuterolysin-type metallo-proteinase			5.9631	10.6515	10.9492		-1
AN8102	pepAc	Putative pepsin-like aspartic protease; predicted glycosyl phosphatidylinositol (GPI)-anchor	cell wall anchored		-0.407027	-0.810638	-1.0789
AN8312		Has domain(s) with predicted metalloendopeptidase activity, metallopeptidase activity and role in proteolysis			0	3.71266	0
AN8315		Has domain(s) with predicted metallopeptidase activity			-2.27601	-1.93451	-2.29927		1
AN8445		Putative aminopeptidase Y; transcript is induced by nitrate			-0.324865	1.32274	0.930106
			Number of upregulated genes in the group:		10	15	16		4	0	3	2
			Number of downregulated genes in the group:		6	6	6		9	2	2	0
			Number of genes in the group:		43	43	43		43	43	43	43
			Total number of upregulated genes:		1749	2159	2371		918	286	322	433
			Total number of downregulated genes:		1270	1705	1960		1193	69	148	203
			Total number of genes:		10867	10867	10867		10867	10867	10867	10867
			p value for the upregulated genes:		0.1424	0.01525	0.01544		0.4978	1	0.1341	0.5158
			p value for the downregulated genes:		0.3885	0.6868	0.8129		0.04091	0.03035	0.116	1
Carbohydrate-active enzyme genes (without the genes presented in the "cell wall" genes group)
GENEID	Gene namea	Featurea	Descriptionb	Subset	log2FC values				Regulation (up=1, down=-1)
					Lactose containing cultures	Arabinogalactan containing cultures	Carbon starved cultures		Culture specific gene
					vs.	vs.	vs.		Glucose	Lactose	Arabinogalactan	No carbon source
					Glucose containing cultures	Glucose containing cultures	Glucose containing cultures
AN0280		Putative alpha-1,4-glucosidase; glucosyl hydrolase; transcriptionally induced by growth on xylose	AN0280.2	alfa-glucosidase	-0.82113	0.747252	0.39783
AN0941	agdE	Protein with alpha-glucosidase activity, predicted role in maltose metabolism; transcriptionally induced by isomaltose in an amyR-dependent manner	alfa-glucosidase (AgdE;AN0941.2)	alfa-glucosidase	-1.03959	1.38642	-0.123659				1
AN10420	agdF	Putative alpha-glucosidase with a predicted role in starch metabolism; transcriptionally induced by isomaltose in an amyR-dependent manner	AN10420.3 (AgdF)	alfa-glucosidase	-0.514198	1.21729	0.778985
AN2017	agdA	Putative alpha-glucosidase with a predicted role in maltose metabolism; transcriptionally induced by isomaltose	alfa-glucosidase (AgdA;AN2017.2)	alfa-glucosidase	-0.45103	-0.632693	-0.248411
AN3504		Putative alpha-1,4-glucosidase; transcript is induced by nitrate	AN3504.2	alfa-glucosidase	-1.44129	0.269508	-0.998698
AN4843	agdG	Putative alpha-glucosidase with a predicted role in maltose metabolism	AN4843.2 (AgdG)	alfa-glucosidase	0.468137	-0.702852	0.0245926
AN7120		Putative alpha-1,4-glucosidase	AN7120.2	alfa-glucosidase	-1.83254	10.3431	1.35888				1
AN7345	agdC	Protein with glucosidase activity, involved in degradation of glucans; predicted role in maltose metabolism	alfa-glucosidase (AgdC;AN7345.2)	alfa-glucosidase	-0.788744	1.79628	5.35033					1
AN8953	agdB	Putative alpha-glucosidase with a predicted role in maltose metabolism; transcriptionally induced by isomaltose; induced by rapamycin-induced autophagy	alfa-glucosidase (AgdB;AN8953.2)	alfa-glucosidase	-3.60257	-5.27781	-5.17575		1
AN0479	bglO	Putative beta-glucosidase with a predicted role in polysaccharide degradation	AN0479.2	beta-glucosidase	1.02011	1.1121	0.445106
AN0712	bglB	Protein with beta-glucosidase activity, involved in degradation of glucans	beta-glucosidase (AN0712.2)	beta-glucosidase	1.07785	3.37332	1.10944		-1		1
AN1804	bglC	Protein with beta-glucosidase activity, involved in degradation of glucans	beta-glucosidase (AN1804.2)	beta-glucosidase	-1.77565	2.98404	0.794012				1
AN2227	bglI	Putative beta-glucosidase with a predicted role in degradation of glucans	AN2227.2	beta-glucosidase	0.135127	1.88258	0.414446				1
AN2612	bglK	Putative beta-glucosidase with a predicted role in degradation of glucans	AN2612.2	beta-glucosidase	-2.65146	-1.29097	-0.794208			-1
AN2828	bglL	Putative beta-glucosidase with a predicted role in polysaccharide degradation	beta-glucosidase (AN2828)	beta-glucosidase	6.08523	8.68989	8.27311		-1
AN3903	bglH	Putative beta-glucosidase with a predicted role in polysaccharide degradation	AN3903.2 (fragment)	beta-glucosidase	2.16493	3.61976	3.99226		-1
AN3949	bglN	Putative beta-glucosidase with a predicted role in polysaccharide degradation	AN3949.2	beta-glucosidase	1.22257	3.89612	2.04293				1
AN4102	bglA	Putative beta-glucosidase; induced by carbon starvation-induced autophagy	AN4102.2	beta-glucosidase	0.674113	1.80811	1.03077
AN5976	bglG	Putative beta-glucosidase	AN5976.2	beta-glucosidase	2.43891	4.8316	3.16886		-1		1
AN6652	bglE	Putative beta-glucosidase	AN6652 (Anid-Bgl101)	beta-glucosidase	0.037761	0.337978	0.261209
AN7865	bglJ	Putative beta-glucosidase	AN7865.2	beta-glucosidase	-3.66234	-4.05992	-4.37813		1
AN9183	bglR	Putative beta-glucosidase with a predicted role in polysaccharide degradation	AN9183.2	beta-glucosidase	-0.94862	-0.317203	-3.21337					-1
AN1041		Putative beta-1,4-endoglucanase	AN1041.2	beta-1,4-endoglucanase	-1.30217	-1.53851	-1.78303		1
AN1285	eglA	Endo-beta-1,4-glucanase A; cellulase involved in degradation of glucans; expression induced by carboxymethylcellulose and cellobiose	endo-beta-1,4-glucanase A (EglA; AN1285.2)	beta-1,4-endoglucanase	-0.132902	3.60678	-0.967997				1
AN1602		Putative beta-1,4-endoglucanase; protein with cellulase activity, involved in degradation of glucans	Lytic cellulose monooxygenase (C4-dehydrogenating) (AN1602)	beta-1,4-endoglucanase	1.11084	1.56545	-0.205148
AN2388		Putative beta-1,4-endoglucanase	AN2388.2	beta-1,4-endoglucanase	0.662726	-0.552403	-0.791236
AN2709	eglE	Putative beta-1,4-endoglucanase	AN2709.2 (frameshift)	beta-1,4-endoglucanase	-0.768582	4.30992	0.223801				1
AN3046		Putative beta-1,4-endoglucanase	AN3046.2	beta-1,4-endoglucanase	2.21001	2.94131	0.631386
AN3418	eglB	Protein with cellulase activity, involved in degradation of glucans	endo-beta-1,4-glucanase (EglB;AN3418.2)	beta-1,4-endoglucanase	3.67633	6.74306	0.779922				1
AN3860		Putative beta-1,4-endoglucanase	AN3860.2 (EglF)	beta-1,4-endoglucanase	1.06535	6.64331	0.162144				1
AN5214		Putative beta-1,4-endoglucanase, involved in degradation of glucans	endo-beta-1,4-glucanase (AN5214.2)	beta-1,4-endoglucanase	0.767341	0.814896	1.83935					1
AN6428		Putative beta-1,4-endoglucanase	AN6428.2	beta-1,4-endoglucanase	5.62838	9.17087	3.51086		-1		1
AN6786		Putative beta-1,4-endoglucanase	AN6786.2	beta-1,4-endoglucanase	-1.20717	-2.09608	-3.56036		1			-1
AN7891		Putative beta-1,4-endoglucanase	AN7891.2	beta-1,4-endoglucanase	-4.35646	-4.59034	-6.14116		1			-1
AN8068		Putative beta-1,4-endoglucanase	AN8068.2	beta-1,4-endoglucanase	-3.18798	-3.87993	-3.65262		1
AN9524		Putative beta-1,4-endoglucanase	AN9524.2	beta-1,4-endoglucanase	-0.0979436	-0.356172	-2.82276					-1
AN0494	cbhB	Protein with cellulose 1,4-beta-cellobiosidase activity, involved in degradation of glucans	cellobiohydrolase I (CBHI;CbhB;AN0494.2)	cellobiosidase and cellobiose dehydrogenase	-1.13664	-0.171712	-0.961801
AN1273	cbhD	Putative cellulose 1,4-beta-cellobiosidase with a predicted role in cellulose metabolism	AN1273.2	cellobiosidase and cellobiose dehydrogenase	1.84635	3.24375	0.548567				1
AN5176	cbhA	Putative cellulose 1,4-beta-cellobiosidase with a predicted role in degradation of glucans	AN5176.2 (CbhA)	cellobiosidase and cellobiose dehydrogenase	0.788723	4.9932	0.628398				1
AN5282	cbhC	Protein with cellulose 1,4-beta-cellobiosidase activity, involved in degradation of glucans	cellobiohydrolase II (CBHII;AN5282.2)	cellobiosidase and cellobiose dehydrogenase	3.93609	7.04329	2.43401		-1		1
AN7230		Putative cellobiose dehydrogenase	AN7230.2	cellobiosidase and cellobiose dehydrogenase	0.55948	7.40876	-1.21167				1	-1
AN0022	aglA	Putative alpha-1,4-galactosidase	AN0022.2 (fragment)	alfa-galactosidase	1.12645	1.81412	-1.33447
AN3874	aglF	Putative alpha-1,4-galactosidase	AN3874.2	alfa-galactosidase	1.33401	1.22796	1.5302		-1
AN7152	aglD	Protein with alpha-galactosidase activity, involved in degradation of mannans, predicted role in galactose and galactitol metabolism	alfa-galactosidase (AN7152.2)	alfa-galactosidase	1.64607	5.90721	1.30231		-1		1
AN7624	aglB	Putative alpha-galactosidase with a predicted role in galactose and galactitol metabolism and in degradation of mannans	AN7624.2	alfa-galactosidase	-0.955544	-2.69756	-0.841433				-1
AN8138	aglC	Alpha-galactosidase, involved in degradation of mannans; predicted role in galactose and galactitol metabolism; glycoside hydrolase family 36 (GH36); transcriptionally induced by growth on xylose	alfa-galactosidase (AglC;AN8138.2)	alfa-galactosidase	4.74599	3.64649	0.565711			1
AN8392	aglE	Putative alpha-glycosidase distantly related to bacterial alpha-galactosidase; predicted role in polysaccharide degradation	AN8392.2	alfa-galactosidase	4.20128	1.98408	0.160951			1
AN9035	aglG	Putative alpha-galactosidase with a predicted role in galactose and galactitol metabolism and in degradation of mannans	AN9035.2	alfa-galactosidase	6.22785	4.34675	-0.679507			1
AN0194	lacC	Putative beta-galactosidase	AN0194.2	beta-galactosidase	0.958218	1.85477	2.51217
AN0756	lacA	Beta-galactosidase with a predicted role in lactose metabolism	AN0756.2	beta-galactosidase	1.57693	2.18076	-0.16344
AN0980	lacB	Beta-galactosidase with a predicted role in lactose metabolism	AN0980.2	beta-galactosidase	-0.181199	0.225962	-0.841153
AN2463	lacF	Putative beta-galactosidase with a predicted role in lactose metabolism	AN2463	beta-galactosidase	1.04338	2.44524	0.749321				1
AN2804		Putative beta-galactosidase; transcript repressed by nitrate	AN2804.2	beta-galactosidase	4.06831	5.90977	0.819406				1
AN3201	lacD	Putative beta-galactosidase with a predicted role in lactose metabolism	AN3201 (BgaD)	beta-galactosidase	10.9145	9.69642	3.04686		-1	1
AN6388	lacE	Putative beta-galactosidase with a predicted role in polysaccharide degradation	AN6388.2	beta-galactosidase	1.90721	1.78479	1.95048		-1
AN9166		Putative exo-1,6-galactanase	AN9166.2	galactanase	0.678372	3.62181	0.841329				1
AN5727	galA	Protein with endo-beta-1,4-galactanase activity, involved in degradation of pectin	endo-beta-1,4-galactanase (EnGAL;AN5727.2)	galactanase	0.11715	0.441391	0.219043
AN1277	abfC	Protein with alpha-arabinofuranosidase activity, involved in degradation of pectin	alfa-L-arabinofuranosidase (AN1277.2)	arabinofuranosidase and endo-arabinosidase	0.553783	2.38237	0.641411				1
AN1571	abfB	Protein with alpha-arabinofuranosidase activity, involved in degradation of pectin	alfa-L-arabinofuranosidase (AbfB;AN1571.2)	arabinofuranosidase and endo-arabinosidase	-2.0997	1.4113	0.428479			-1
AN2060	abxA	Putative exo-arabinanase	AN2060.2	arabinofuranosidase and endo-arabinosidase	0.206556	1.85165	0.638722				1
AN2533		Putative alpha-L-arabinofuranosidase	AN2533.2	arabinofuranosidase and endo-arabinosidase	1.13026	2.98384	1.39203		-1		1
AN2534	abnA	Putative arabinan endo-1,5-alpha-L-arabinosidase with a predicted role in arabinose polymer metabolism	AN2534.2	arabinofuranosidase and endo-arabinosidase	1.68658	3.50011	2.91343		-1
AN2541	abfA	Putative alpha-L-arabinofuranosidase with a predicted role in arabinose polymer metabolism; the feature AN9520 has been merged into AN2541	AN9520.2 or AN2541.2	arabinofuranosidase and endo-arabinosidase	0	2.6453	4.7619
AN2632	axhB	Putative alpha-L-arabinofuranosidase with a predicted role in arabinose polymer metabolism	AN2632.2	arabinofuranosidase and endo-arabinosidase	3.31082	10.6369	4.56402		-1		1
AN3044	abnD	Putative arabinan endo-1,5-alpha-L-arabinosidase with a predicted role in degradation of pectin; predicted glycosylphosphatidylinositol (GPI)-anchored protein	AN3044.2	arabinofuranosidase and endo-arabinosidase	-0.71956	-0.629653	-1.36365
AN5231		Putative exo-arabinanase	AN5231.2	arabinofuranosidase and endo-arabinosidase	-0.286162	-0.929835	-0.123171
AN6352	abnB	Protein with arabinan endo-1,5-alpha-L-arabinosidase activity, involved in degradation of pectin	endo-alfa-1,5-L-arabinosidase (AN6352.2)	arabinofuranosidase and endo-arabinosidase	-1.51362	-2.33111	-1.76612		1
AN7781		Putative alpha-L-arabinofuranosidase	AN7781.2	arabinofuranosidase and endo-arabinosidase	-0.213831	3.54655	-1.56369				1	-1
AN7908	axhA	Protein with alpha-arabinofuranosidase activity, involved in degradation of pectin; member of the F9775 secondary metabolite gene cluster	alfa-L-arabinofuranosidase (AN7908.2)	arabinofuranosidase and endo-arabinosidase	6.00489	10.2619	4.19691		-1		1
AN8007	abnC	Protein with arabinan endo-1,5-alpha-L-arabinosidase activity, involved in degradation of pectin	endo-alfa-1,5-L-arabinosidase (AN8007.2)	arabinofuranosidase and endo-arabinosidase	3.08872	5.37931	5.7381		-1
AN8472		Putative alpha-L-arabinofuranosidase	AN8472.2	arabinofuranosidase and endo-arabinosidase	0.54395	5.07658	2.53025				1
AN1818	xlnC	Protein with endo-1,4-beta-xylanase activity, involved in degradation of xylans	xylanase (XlnC;X34;AN1818.2)	xylanase	0.606953	6.42793	-0.0145056				1
AN2356		Putative beta-1,4-endoxylanase	AN2356.2	xylanase	1.97901	2.45126	4.43034					1
AN3613	xlnA	Protein with endo-1,4-beta-xylanase activity, involved in degradation of xylans; transcription is controlled by the carbon catabolite repression system	xylanase 1 (XlnA;X22;AN3613.2)	xylanase	2.1665	10.873	4.39351		-1		1
AN7401	xlnE	Putative endo-1,4-beta-xylanase with a predicted role in xylose polymer metabolism	AN7401.2	xylanase	1.64603	6.29261	0.0842263				1
AN9365	xlnB	Protein with endo-1,4-beta-xylanase activity, involved in degradation of xylans	xylanase 2 (XlnB;X24;AN9365.2)	xylanase	-0.908373	-1.42048	0.575832
AN10919		Putative beta-1,4-xylosidase	ANIA_10919 (fragment)	xylosidase	7.15416	11.9743	8.28333		-1		1
AN1477		Putative beta-1,4-xylosidase	AN1477.2	xylosidase	2.79375	4.61292	2.54195		-1		1
AN1870		Putative beta-1,4-xylosidase	AN1870.2	xylosidase	2.38222	3.23647	3.53342		-1
AN2217	bxlC	Putative beta-1,4-xylosidase with a predicted role in polysaccharide degradation	AN2217.2	xylosidase	0.0278084	2.1713	0.902958				1
AN2359	xlnD	Beta-xylosidase, involved in degradation of xylans; transcriptionally induced by growth on xylose	beta-xylosidase (BxlA;XlnD;AN2359.2)	xylosidase	5.13007	2.53912	-1.51979			1		-1
AN2664		Putative beta-1,4-xylosidase	AN2664.2	xylosidase	0.0190596	0.803046	-0.569187
AN7275		Putative beta-1,4-xylosidase	AN7275.2	xylosidase	3.0368	6.79917	5.66774		-1		1
AN7313		Putative beta-1,4-xylosidase	AN7313.2	xylosidase	5.35517	7.16939	1.10984		-1		1
AN7505	agdD	Protein with alpha-xylosidase activity, involved in degradation of xyloglucans	alfa-xylosidase (AgdD;AN7505)	xylosidase	1.40625	1.13365	-0.35082
AN7864	bxlD	Putative beta-1,4-xylosidase	AN7864.2	xylosidase	4.17479	8.44079	4.47447		-1		1
AN8401	bxlB	Protein with alpha-L-arabinofuranosidase activity, involved in degradation of xylans; putative beta-1,4-xylosidase	beta-xylosidase / alfa-L-arabinofuranosidase (BxlB;AnXA;AN8401.2)	xylosidase	2.0617	9.66235	0.623114				1
AN8477		Putative beta-1,4-xylosidase	AN8477.2	xylosidase	2.10669	7.33315	3.57153		-1		1
AN3294		Protein with acetylxylan esterase activity, involved in degradation of xylans	acetyl esterase (AN3294.2)	further xylan degrading enzyme gene	0.103901	-0.282474	0.141953
AN6093	axeA	Protein with acetylxylan esterase activity, involved in degradation of xylans	acetyl esterase (AnAXE;AN6093.2)	further xylan degrading enzyme gene	1.46903	4.09484	1.29062		-1		1
AN5267	faeC	Protein with ferulic acid esterase activity, involved in degradation of xylans	AnFAE;AN5267.2	further xylan degrading enzyme gene	5.69931	10.2291	5.30529		-1		1
AN3991		Putative unsaturated glucuronyl hydrolase; transcript upregulated by nitrate limitation	AN3991.2	further xylan degrading enzyme gene	9.4506	9.57756	5.97746		-1
AN2395		Putative beta-glucuronidase with a predicted role in polysaccharide degradation		further xylan degrading enzyme gene	-0.913981	3.88507	5.31341					1
AN3200		Putative beta-glucuronidase with a predicted role in polysaccharide degradation; the predicted pseudogene AN10383 and predicted ORF AN3200 occupy overlapping chromosomal locations in version 4 of the A. nidulans annotation	AN3200	further xylan degrading enzyme gene	1.81385	0.620198	0.987607
AN9286	aguA	Alpha-glucuronidase, involved in degradation of xylans; transcriptionally induced by growth on xylose	xylan alfa-1,2-glucuronidase (AN9286.2)	further xylan degrading enzyme gene	2.98425	3.40879	1.53894		-1
AN3297	manB	Protein with endo-beta-(1,4)-mannanase activity, involved in degradation of mannans	endo-beta-1,4-mannanase (ManB;AnMan5B;AN3297)	mannan degradation	6.41349	8.95084	3.2068		-1		1
AN3326		Putative enodomannanase	AN3326.2	mannan degradation	-2.25359	-2.03344	-1.30997
AN3336		Putative enodomannanase	AN3336.2	mannan degradation	-5.34115	-9.3007	-8.57723		1
AN3358		Protein with endo-beta-(1,4)-mannanase activity, involved in degradation of mannans	endo-beta-1,4-mannanase (ManA;AnMan5A;AN3358)	mannan degradation	0.0377818	0.717359	-0.0372918
AN3368	mndB	Protein with beta-mannosidase activity, involved in degradation of mannans; transcriptionally induced by growth on xylose	beta-mannosidase (AN3368.2)	mannan degradation	1.96411	1.26349	-2.28255					-1
AN3566	mns1C	Putative alpha-mannosidase with a predicted role in mannose polymer metabolism	AN3566.2	mannan degradation	-0.142979	1.27348	0.489341
AN3733	mns1A	Putative alpha-1,2 mannosidase with a predicted role in mannose polymer metabolism	AN3733.2	mannan degradation	0.843694	1.67045	1.93196
AN5748		Putative mannosyl-oligosaccharide 1,2-alpha-mannosidase with a predicted role in mannose polymer metabolism	AN5748.2	mannan degradation	-0.0594998	-0.116757	-0.0919014
AN6286		Has domain(s) with predicted mannosyl-oligosaccharide glucosidase activity and role in oligosaccharide metabolic process	AN6286.2	mannan degradation	-0.286096	-1.22963	-1.04453
AN6427	manC	Protein with endo-beta-(1,4)-mannanase activity, involved in degradation of mannans	endo-beta-1,4-mannanase (ManC;AnMan5C;AN6427;ANID_06427)	mannan degradation	2.69533	9.73653	0.434778				1
AN6606		Ortholog(s) have mannosyl-oligosaccharide glucosidase activity	AN6606.2 (fragment)	mannan degradation	-0.304607	-0.33264	-0.251654
AN7413	manE	Putative endo-beta-(1,4)-mannanase with predicted role in degradation of mannans	endo-beta-1,4-mannanase (AnMan26A;AN7413.2)	mannan degradation	1.36801	9.22981	4.15741				1
AN7639	manD	Putative beta-1,4-endomannanase	AN7639.2	mannan degradation	-0.354509	0.671458	0.499268
AN9276	manF	Putative beta-1,4-endomannanase	AN9276.2	mannan degradation	1.96877	10.725	2.99005		-1		1
AN0551		Putative mannosyl-oligosaccharide 1,2-alpha-mannosidase with a predicted role in mannose polymer metabolism	AN0551.2	mannan degradation	-0.898658	-1.84605	-2.0132
AN0787	mns1B	Putative mannosyl-oligosaccharide 1,2-alpha-mannosidase with a predicted role in mannose polymer metabolism	AN0787.2	mannan degradation	0.391495	2.44966	3.10958
AN1742	mndA	Putative beta-1,4-mannosidase with a predicted role in polysaccharide degradation	ANIA_01742 (AN1742.2)	mannan degradation	2.4518	1.56283	1.37196		-1
AN2045		Has domain(s) with predicted calcium ion binding, mannosyl-oligosaccharide 1,2-alpha-mannosidase activity and membrane localization	AN2045.2	mannan degradation	0.172769	0.347961	0.175683
AN2936		Putative Class 2C alpha-mannosidase with a predicted role in mannose polymer metabolism	AN2936.2	mannan degradation	-0.095522	0.380542	0.857079
AN1542	xgcA	Protein with oligoxyloglucan reducing end-specific cellobiohydrolase activity, involved in degradation of xyloglucans	oligoxyloglucan reducing end-specific xyloglucanobiohydrolase (OREX;AN1542.2)	xyloglucan degradation gene	-2.56758	-2.47778	-3.38026		1
AN6673	afcB	Putative alpha-fucosidase	AN6673.2	xyloglucan degradation gene	0.674516	4.38963	2.34503				1
AN8149	afcA	Protein with alpha-fucosidase activity, involved in degradation of xyloglucans	alfa-1,2-L-fucosidase (AN8149.2)	xyloglucan degradation gene	3.18458	3.17323	2.65178		-1
AN0741	pelA	Pectate lyase involved in degradation of pectin; regulated by the carbon catabolite repression system	pectate lyase (PelA;AN0741.2)	galacturonan degradation	-0.0953694	3.16004	0.858962				1
AN2331		Protein with pectin lyase activity, involved in degradation of pectin	pectin lyase (AN2331.2)	galacturonan degradation	0.436318	-0.0417178	0.241204
AN2537		Putative pectate lyase with a predicted role in pectin degradation	AN2537.2	galacturonan degradation	-0.537831	-0.112982	-0.503894
AN2542	plyD	Putative pectate lyase with a predicted role in the degradation of pectin	AN2542.2	galacturonan degradation	-1.24985	0.468508	-1.26802
AN2569	pelB	Protein with pectin lyase activity, involved in degradation of pectin	pectin lyase (PL1;AN2569.2)	galacturonan degradation	0.31828	9.42363	0.334847				1
AN3337	plyE	Protein with pectate lyase activity, involved in degradation of pectin	pectate lyase (AN3337.2)	galacturonan degradation	1.15117	6.22151	1.90101				1
AN3390	pmeA	Protein with pectinesterase activity, involved in degradation of pectin	pectin methyl esterase (PME;AN3390.2)	galacturonan degradation	-2.77197	-8.52594	-11.2122		1			-1
AN4372	pgaB	Protein with polygalacturonase activity, involved in degradation of pectin	endo-polygalacturonase (PG1;AN4372.2)	galacturonan degradation	0.846809	0.848173	1.94845					1
AN4860	pmeB	Putative pectin methyl esterase	AN4860.2	galacturonan degradation	0.834248	1.05994	0.225565
AN4882	pelF	Putative pectin lyase involved in degradation of pectin	AN4882.2	galacturonan degradation	-0.346466	0.0715435	-0.0664482
AN5333	plyC	Putative pectate lyase, involved in degradation of pectin	AN5333.2	galacturonan degradation	-0.250965	-0.33877	0.602541
AN5361		Putative beta-glucuronidase with a predicted role in carbohydrate catabolism	AN5361.2	galacturonan degradation	-0.506389	4.39167	3.4927
AN6106	plyF	Putative pectate lyase with a predicted role in pectin degradation	AN6106.2	galacturonan degradation	1.06962	2.81471	1.85744		-1
AN6656	pgaD	Putative enodopolygalacturonase	AN6656.2	galacturonan degradation	-0.627148	-0.0191588	2.07616					1
AN6748	plyG	Putative pectate lyase with a predicted role in pectin degradation	AN6748.2	galacturonan degradation	0.522738	3.47642	3.71011
AN7646	plyA	Protein with pectate lyase activity, involved in degradation of pectin	pectate lyase (AN7646.2)	galacturonan degradation	0.699695	1.64594	1.26565
AN7966		Putative pectin methyl esterase	AN7966.2 (fragment)	galacturonan degradation	0.607264	0	0
AN8327	pgaC	Protein with polygalacturonase activity, involved in degradation of pectin	endo-polygalacturonase (AN8327.2)	galacturonan degradation	0.499952	-0.341749	-1.13949
AN8453	plyH	Protein with pectate lyase activity, involved in degradation of pectin	pectate lyase (AN8453.2)	galacturonan degradation	-3.16033	0.0148319	-2.92135
AN8761	pgxA	Protein with polygalacturonase activity, involved in degradation of pectin	exo-polygalacturonase (AN8761.2)	galacturonan degradation	1.7695	4.51547	1.76059		-1		1
AN8891	pgxB	Putative exopolygalacturonase	AN8891.2	galacturonan degradation	2.18203	3.6951	3.23727		-1
AN9045	pgxD	Protein with polygalacturonase activity, involved in degradation of pectin	exo-polygalacturonase (AN9045.2)	galacturonan degradation	2.55449	4.67981	4.82503		-1
AN9439	pelD	Putative pectin lyase, involved in degradation of pectin	AN9439.2	galacturonan degradation	-0.339512	1.70693	1.20628
AN3389	xghA	Putative xylogalacturonan hydrolase	AN3389.2	galacturonan degradation	-3.06022	2.21576	1.94248			-1
AN10274	rhgB	Putative rhamnogalacturonan hydrolase	AN10274.3	rhamnogalacturonan degradation	2.22451	2.27333	2.18181		-1
AN10277	rhaA	Protein with rhamnogalacturonan acetylesterase activity, involved in degradation of pectin	rhamnogalacturonan alfa-L-rhamnohydrolase (RhaA;AN10277)	rhamnogalacturonan degradation	1.67281	3.9294	1.63419		-1		1
AN2528		Protein with rhamnogalacturonan acetylesterase activity, involved in degradation of pectin	rhamnogalacturonan acetylesterase (AN2528.2)	rhamnogalacturonan degradation	0.581604	1.13205	1.33292
AN2543		Putative rhamnogalacturonan lyase; transcript repressed by nitrate	AN2543.2	rhamnogalacturonan degradation	-1.16073	1.08638	-2.14068
AN2834		Putative rhamnogalacturonan acetyl esterase; transcript is induced by nitrate	AN2834.2	rhamnogalacturonan degradation	4.24337	5.30758	5.04545		-1
AN3196	urhA	Putative unsaturated rhamnogalacturonan hydrolase; glycosyl hydrolase family 88 protein	AN3196.2	rhamnogalacturonan degradation	2.93597	1.91379	0.913575			1
AN3950	rglD	Putative rhamnogalacturonan lyase	AN3950.2	rhamnogalacturonan degradation	1.04504	1.0573	3.32115					1
AN6395	rglB	Protein with rhamnogalacturonan lyase activity, involved in degradation of pectin	rhamnogalacturonan lyase (AN6395.2)	rhamnogalacturonan degradation	0.491203	1.57124	1.08491
AN7135	rglA	Protein with rhamnogalacturonan lyase activity, involved in degradation of pectin	rhamnogalacturonan lyase (AN7135.2)	rhamnogalacturonan degradation	2.5058	3.35144	2.44877		-1
AN7828	urhB	Putative unsaturated rhamnogalacturonan hydrolase	AN7828.2	rhamnogalacturonan degradation	2.58665	7.12478	3.24677		-1		1
AN9134	rhgA	Protein with rhamnogalacturonase activity, involved in degradation of pectin	rhamnogalacturonase (AN9134.2)	rhamnogalacturonan degradation	0.434819	0.365778	0.417266
AN9383	urhC	Putative unsaturated rhamnogalacturonan hydrolase	AN9383.2	rhamnogalacturonan degradation	2.62248	3.33976	2.69369		-1
AN2631		Putative alpha-L-rhamnosidase	AN2631.2	rhamnogalacturonan degradation	-3.02123	1.13178	-0.148978
AN3780		Putative alpha-L-rhamnosidase	AN3780.2	rhamnogalacturonan degradation	0.381458	2.72553	1.68847
AN7151	rhaE	Putative alpha-L-rhamnosidase; induced by L-rhamnose and repressed by D-glucose; more closely related to bacterial rhamnosidases than other alpha-L-rhamnosidases of fungal origin	alfa-L-rhamnosidase (RhaE;AN7151)	rhamnogalacturonan degradation	2.67603	3.87248	2.29234		-1		1
AN8465	rhaF	Putative alpha-L-rhamnosidase; expression upregulated after exposure to farnesol	AN8465.2	rhamnogalacturonan degradation	2.54122	3.89502	4.04588
AN2424		Has domain(s) with predicted beta-N-acetylhexosaminidase activity, catalytic activity, hydrolase activity, hydrolyzing O-glycosyl compounds activity and role in carbohydrate metabolic process	AN2424.2	N-acetylhexosaminidase	2.271	2.32081	2.68861		-1
AN3837		Putative invertase; sucrose hydrolyzing enzyme	AN3837.2	invertase	0.204622	0.669704	1.6217
AN10060		Putative alpha-amylase; glycogen debranching enzyme	ANIA_10060	other	0.551137	-0.0756847	0.0829914
AN1015		Putative phosphorylase with a predicted role in glycogen degradation	AN1015.2	other	-0.547376	-0.374938	-0.301224
AN11143	glaA	Putative glucoamylase with a predicted role in starch metabolism	AN11143.3 (GlaA)	other	0.282034	1.211	2.34408					1
AN2314		Putative 1,4-alpha-glucan branching enzyme with a predicted role in starch metabolism	AN2314.2	other	0.3655	-1.19372	-1.61577
AN7402	glaB	Putative glucoamylase with a predicted role in starch metabolism	AN7402.2 (GlyB)	other	-2.50476	-0.662176	-2.26222
AN5463		Has domain(s) with predicted starch binding activity and viral capsid localization	lytic starch monooxygenase (AnAA13;AN5463.2)	other	-1.09414	2.43702	-3.69937				1	-1
AN8010		Putative glycogen (starch) synthase with a predicted role in glycogen biosynthesis	AN8010.2	other	-0.148101	-1.75547	-1.0337
AN5397	lccC	Extracellular laccase, a copper-containing enzyme that oxidizes phenolic substrates	AN5397.2	other	0.569076	-6.03179	-7.05774
AN9170	lccB	Extracellular laccase, a copper-containing enzyme that oxidizes phenolic substrates	AN9170.2	other	-1.31631	1.34419	2.65113
AN5309		Putative cutinase with a predicted role in the hydrolysis of cutin	AN5309.2	other	0.94892	9.76071	7.75034				1
AN7180		Protein with cutinase activity, involved in carbohydrate catabolism	cutinase (AN7180.2)	other	0.765753	2.63269	2.69461
AN7541	cut2	Protein with cutinase activity, involved in carbohydrate catabolism; activity induced by olive oil, some triacylglycerides and fatty acids; repressed by glucose and other sugars	cutinase (AN7541.2)	other	0.699192	0.295023	0.857912
AN0012		Ortholog of A. fumigatus Af293 : Afu5g10930, A. oryzae RIB40 : AO090701000510, Aspergillus flavus NRRL 3357 : AFL2T_06133 and Neosartorya fischeri NRRL 181 : NFIA_076310	AN0012.2	other	-1.76563	6.89697	7.38022
AN0031		Protein of unknown function	AN0031.2	other	-0.348373	-1.68632	-2.17531
AN0160		Has domain(s) with predicted hydrolase activity, acting on carbon-nitrogen (but not peptide) bonds activity and role in carbohydrate metabolic process	AN0160.2	other	0.179645	-0.552545	-0.629865
AN0246		Ortholog of A. fumigatus Af293 : Afu1g05300, A. niger CBS 513.88 : An01g04570, A. oryzae RIB40 : AO090003000826, Aspergillus wentii : Aspwe1_0049630 and Aspergillus sydowii : Aspsy1_0142918	AN0246.2	other	-0.585336	-0.234724	-0.0306093
AN0265		Ortholog of A. fumigatus Af293 : Afu1g03380, A. niger CBS 513.88 : An01g04760, A. oryzae RIB40 : AO090005000763, Aspergillus wentii : Aspwe1_0049645 and Aspergillus sydowii : Aspsy1_0027812	AN0265.2	other	0.514128	0.201817	-0.0223683
AN0487		Has domain(s) with predicted transferase activity, transferring hexosyl groups activity and role in carbohydrate metabolic process, lipid glycosylation	AN0487.2	other	0.245693	0.833049	0.626082
AN0499		Has domain(s) with predicted chitin binding activity, role in chitin metabolic process and extracellular region localization	AN0499.2	other	0.607272	3.51191	2.76213
AN0567		Putative alcohol oxidase with a predicted role in glycerol metabolism	AN0567 / ANIA_00567	other	5.39594	9.30388	4.97078		-1		1
AN0602		Ortholog of A. niger CBS 513.88 : An15g02350, A. oryzae RIB40 : AO090023000525, Aspergillus wentii : Aspwe1_0050808, Aspwe1_0063480 and Aspergillus sydowii : Aspsy1_0055411	ANIA_00602	other	0.00804127	-0.430597	-0.84796
AN0636		Ortholog(s) have acetylglucosaminyltransferase activity and role in GPI anchor biosynthetic process, conidium formation, establishment or maintenance of cell polarity, fungal-type cell wall biogenesis, regulation of growth rate	AN0636.2	other	0.308993	0.474775	0.269972
AN0778		Has domain(s) with predicted viral capsid localization	AN0778.2	other	0.747714	2.59454	2.86341
AN10016		Ortholog of A. fumigatus Af293 : Afu5g11710, A. niger CBS 513.88 : An18g03020, A. oryzae RIB40 : AO090120000289, Neosartorya fischeri NRRL 181 : NFIA_075570 and Aspergillus wentii : Aspwe1_0026623	ANIA_10016	other	1.09428	1.52005	1.05437		-1
AN1043		Has domain(s) with predicted hydrolase activity, hydrolyzing O-glycosyl compounds activity and role in carbohydrate metabolic process	ANIA_01043	other	0.338322	2.59805	1.85738
AN10488		Has domain(s) with predicted carbohydrate binding, catalytic activity and role in carbohydrate catabolic process	ANIA_10488	other	2.82434	3.29741	5.55369					1
AN1107		Protein of unknown function	ANIA_01107 (AN1107.2) (fragment)	other	0.997691	1.53303	1.59346
AN1197		Has domain(s) with predicted carbohydrate binding, catalytic activity and role in carbohydrate metabolic process	AN1197.2	other	1.71246	2.57654	5.18164		-1			1
AN1257		Has domain(s) with predicted transferase activity, transferring glycosyl groups activity	AN1257.2	other	0.709825	0.439243	3.03542					1
AN1416		Ortholog(s) have H3 histone acetyltransferase activity, N-acetyltransferase activity	AN1416.2	other	0.210234	0.163666	0.274675
AN1429	codA	Putative choline oxidase; intracellular, menadione stress-induced protein	AN1429.2	other	-0.86585	-0.938231	-1.12242
AN1455		Ortholog(s) have dolichyl-diphosphooligosaccharide-protein glycotransferase activity, role in protein N-linked glycosylation and oligosaccharyltransferase complex, plasma membrane localization	AN1455.2	other	-0.651989	-0.827088	-0.900822
AN1607		Has domain(s) with predicted transferase activity, transferring hexosyl groups activity and role in carbohydrate metabolic process, lipid glycosylation, metabolic process	AN1607.2	other	-2.3359	-3.29383	-1.41955		1
AN1620		Ortholog of A. nidulans FGSC A4 : AN2626, A. fumigatus Af293 : Afu8g02040/och3, A. niger CBS 513.88 : An03g01090/hocA, An05g02320 and A. oryzae RIB40 : AO090010000615	AN1620.2	other	-1.32127	-1.4866	-0.129044
AN1811		Ortholog(s) have dolichyl-phosphate-mannose-glycolipid alpha-mannosyltransferase activity, glutathione binding activity and role in GPI anchor biosynthetic process	AN1811.2	other	0.0880969	0.223454	0.451143
AN2010		Protein of unknown function	AN2010.2 (fragment)	other	-4.81947	-7.24914	-6.8068		1
AN2015		Has domain(s) with predicted transferase activity, transferring glycosyl groups activity and membrane localization	AN2015.2	other	-0.568055	-0.902886	-0.71978
AN2325		Has domain(s) with predicted carbohydrate binding, catalytic activity and role in carbohydrate metabolic process	AN2325.2	other	2.2099	3.04891	4.85421		-1			1
AN2425		Ortholog of A. fumigatus Af293 : Afu2g13850, A. niger CBS 513.88 : An02g05260, A. oryzae RIB40 : AO090026000188, Aspergillus wentii : Aspwe1_0054675 and Aspergillus sydowii : Aspsy1_0075212	AN2425.2	other	0.111388	-0.367029	-0.722255
AN2563		Has domain(s) with predicted transferase activity, transferring hexosyl groups activity and role in metabolic process	AN2563.2 (fragment)	other	0	0	0.589097
AN2582		Has domain(s) with predicted role in cell wall macromolecule catabolic process	AN2582.2	other	-0.996382	-0.970707	-0.898606
AN2626		Ortholog of A. nidulans FGSC A4 : AN1620, A. fumigatus Af293 : Afu8g02040/och3, A. niger CBS 513.88 : An03g01090/hocA, An05g02320 and A. oryzae RIB40 : AO090010000615	AN2626.2	other	-0.485331	0.653657	0.749582
AN2633		Has domain(s) with predicted hydrolase activity, hydrolyzing O-glycosyl compounds activity and role in carbohydrate metabolic process	ANIA_02633 (short fragment)	other	-2.84188	-0.267812	-1.02957
AN2690		Has domain(s) with predicted hydrolase activity, hydrolyzing O-glycosyl compounds activity and role in carbohydrate metabolic process	AN2690.2	other	-0.115217	1.31104	1.84944
AN2710		Ortholog of A. nidulans FGSC A4 : AN6951, AN6833, A. fumigatus Af293 : Afu1g01520, A. oryzae RIB40 : AO090038000445, Neosartorya fischeri NRRL 181 : NFIA_023140 and Aspergillus wentii : Aspwe1_0116569	endo-beta-1,4-mannanase (AN2710;ANID_02710)	other	1.54167	11.4416	3.21327				1
AN2719		Has domain(s) with predicted lysozyme activity and role in cell wall macromolecule catabolic process, peptidoglycan catabolic process	AN2719.2	other	0.660808	2.00298	1.66343
AN2774		Has domain(s) with predicted transferase activity, transferring glycosyl groups activity	AN2774.2	other	-0.476711	-0.167656	-0.571496
AN2923		Ortholog of A. nidulans FGSC A4 : AN10601, A. fumigatus Af293 : Afu2g17770, Afu8g00650, A. niger CBS 513.88 : An11g02090, An01g01000 and A. oryzae RIB40 : AO090020000174, AO090103000301	AN2923.2	other	-1.47553	-2.91778	-2.01988		1
AN2952		Ortholog of A. nidulans FGSC A4 : AN8368, A. fumigatus Af293 : Afu3g07900, Afu4g14080, Afu8g00900, A. niger CBS 513.88 : An02g11330, An03g05560 and A. oryzae RIB40 : AO090120000471	AN2952.2c/ ANIA_02952	other	-1.34996	-4.22504	-4.26202		1
AN2953		Ortholog of A. fumigatus Af293 : Afu3g07890, A. niger CBS 513.88 : An02g11360, A. oryzae RIB40 : AO090005001486, Aspergillus wentii : Aspwe1_0041944 and Aspergillus sydowii : Aspsy1_0056308	AN2953.2	other	-0.897318	-2.5422	-1.93123
AN2955		Has domain(s) with predicted role in biosynthetic process	AN2955.2	other	-1.50514	-4.49334	-4.55542		1
AN3013		Ortholog(s) have steryl-beta-glucosidase activity, role in ergosteryl 3-beta-D-glucoside catabolic process and cytosol localization	AN3013.2	other	0.700232	1.11946	1.97275
AN3054		Has domain(s) with predicted carbohydrate binding, catalytic activity and role in carbohydrate metabolic process	AN3054.2	other	0.6568	1.56504	0.830465
AN3206		Putative aryl-alcohol oxidase-related protein; protein expressed at decreased levels in a hapX mutant versus wild-type; transcript is induced by nitrate	AN3206.2	other	0.465345	1.99496	1.25582
AN3229	pkfF	Putative aryl-alcohol oxidase-related protein; choline dehydrogenase; aspernidine A secondary metabolism gene cluster member	AN3229.2	other	0.904384	0.970318	1.78927
AN3354		Has domain(s) with predicted hydrolase activity, acting on carbon-nitrogen (but not peptide) bonds activity and role in carbohydrate metabolic process	AN3354.2 (fragment)	other	-1.86628	-5.83127	-4.34696		1		-1
AN3360		Has domain(s) with predicted hydrolase activity, hydrolyzing O-glycosyl compounds activity and role in carbohydrate metabolic process	AN3360.2	other	-1.37257	-0.97431	-0.28751
AN3764		Has domain(s) with predicted carbohydrate binding, catalytic activity and role in carbohydrate metabolic process	AN3764.2	other	2.55003	3.90419	4.0149		-1
AN3925		Has domain(s) with predicted catalytic activity and role in carbohydrate metabolic process	AN3925.2	other	-0.843292	-2.33605	-1.63913
AN4006		Putative glucose oxidase with a predicted role in gluconic acid and gluconate metabolism	AN4006.2	other	-1.78225	-0.0770268	-0.206664			-1
AN4082		Ortholog(s) have UDP-glucosyltransferase activity, glycogenin glucosyltransferase activity and role in glycogen metabolic process	AN4082.2	other	0.558038	0.322207	0.429484
AN4084		Ortholog of A. fumigatus Af293 : Afu1g05595, A. niger CBS 513.88 : An18g04440, A. oryzae RIB40 : AO090009000381, Aspergillus wentii : Aspwe1_0025280 and Aspergillus sydowii : Aspsy1_0149732	AN4084.2	other	-0.315873	-0.477962	-0.654164
AN4092		Ortholog of A. nidulans FGSC A4 : AN7483, A. fumigatus Af293 : Afu2g05710, A. oryzae RIB40 : AO090001000688, Neosartorya fischeri NRRL 181 : NFIA_082430 and Aspergillus versicolor : Aspve1_0043503	AN4092.2	other	0.538922	1.0343	0.571988
AN4212		Putative aryl-alcohol oxidase-related protein	AN4212.2	other	-0.881532	-0.216975	0.558572
AN4390	ecmA	Putative GPI-anchored protein with similarity to Saccharomyces cerevisiae Ecm33p; predicted role in cell wall biosynthesis	AN4390.2	other	-0.758833	-1.31639	-1.11579
AN4395		Ortholog of A. fumigatus Af293 : Afu4g06870, A. niger CBS 513.88 : An04g01260, A. oryzae RIB40 : AO090023000901, Aspergillus wentii : Aspwe1_0023285 and Aspergillus sydowii : Aspsy1_0545881	AN4395.2	other	-0.0972727	-0.162802	-0.348928
AN4573		Has domain(s) with predicted hydrolase activity, hydrolase activity, acting on ester bonds activity and role in lipid metabolic process	AN4573.2	other	1.37759	0.814384	2.24151
AN4601		Ortholog(s) have sterol 3-beta-glucosyltransferase activity and role in ascospore-type prospore membrane assembly, sterol metabolic process	AN4601.2	other	0.502441	0.401962	0.9984
AN4623		Ortholog(s) have UDP-glucose:glycoprotein glucosyltransferase activity, calcium ion binding, mannose binding, misfolded protein binding activity	AN4623.2	other	-0.544328	-0.365752	-0.48558
AN4686		Putative chitosanase; predicted glycosyl phosphatidylinositol (GPI)-anchor	AN4686.2	other	-0.110897	-0.668155	0.377309
AN4738		Ortholog of A. fumigatus Af293 : Afu7g05020, A. niger CBS 513.88 : An04g04790, A. oryzae RIB40 : AO090026000567, Aspergillus wentii : Aspwe1_0027448 and Aspergillus sydowii : Aspsy1_0824362	AN4738.2	other	0.135698	0.488795	0.304685
AN4864	alg6	Putative glucosyltransferase; locus contains the conserved upstream open reading frame (uORF) AN4864-uORF	AN4864.2	other	-0.203039	-0.167148	-0.533579
AN4947		Ortholog(s) have dolichyl-phosphate beta-D-mannosyltransferase activity and role in dolichol-linked oligosaccharide biosynthetic process, fungal-type cell wall biogenesis, protein N-linked glycosylation, protein O-linked glycosylation	AN4947.2	other	-0.847783	-0.944817	-0.603531
AN5021		Ortholog(s) have role in conidium formation, regulation of growth rate	AN5021.2	other	-2.70091	-3.99036	-3.79769		1
AN5281		Putative pyranose oxidase	ANIA_05281	other	-0.17636	0.209238	-0.60223
AN5305		Has domain(s) with predicted catalytic activity	ANIA_05305	other	2.24239	2.66854	3.1388		-1
AN5320		Has domain(s) with predicted hydrolase activity	AN5320.2 (fragment)	other	7.72544	7.04941	4.04217		-1
AN5346		Ortholog(s) have role in establishment or maintenance of cell polarity	AN5346.2	other	0.104155	0.0310921	0.227111
AN5663		Ortholog of A. fumigatus Af293 : Afu4g13710, A. niger CBS 513.88 : An01g09510, A. oryzae RIB40 : AO090010000145, AO090009000200 and Aspergillus wentii : Aspwe1_0106727	AN5663.2	other	-0.52093	-1.10178	-1.64656
AN5725		Protein with a predicted role in asparagine-linked glycosylation; S. cerevisiae ortholog Alg11p has alpha-1,2-mannosyltransferase activity	AN5725.2	other	-0.63576	-1.21456	-1.12229
AN5736		Has domain(s) with predicted role in dolichol-linked oligosaccharide biosynthetic process	AN5736.2 (fragment)	other	-0.256577	-0.264553	-0.411692
AN5902		Ortholog(s) have dolichyl pyrophosphate Glc2Man9GlcNAc2 alpha-1,2-glucosyltransferase activity, dolichyl-phosphate-glucose-glycolipid alpha-glucosyltransferase activity and role in protein N-linked glycosylation	AN5902.2	other	-0.45854	-0.620791	-0.838717
AN5930		Has domain(s) with predicted hydrolase activity	AN5930.2	other	-1.34029	-0.414488	-0.178566
AN6103		Has domain(s) with predicted viral capsid localization	AN6103.2	other	-1.38026	0.354336	0.586232			-1
AN6405		Has domain(s) with predicted catalytic activity, lysozyme activity and role in carbohydrate metabolic process, cell wall macromolecule catabolic process, peptidoglycan catabolic process	AN6405.2	other	-1.9566	-2.41759	-1.87672		1
AN6422		Has domain(s) with predicted hydrolase activity, hydrolase activity, acting on ester bonds activity and role in lipid metabolic process	AN6422.2	other	-0.852822	-0.174871	-3.49629					-1
AN6433		Has domain(s) with predicted transferase activity, transferring hexosyl groups activity and role in metabolic process	AN6433.2	other	-0.136243	-0.831029	-0.521352
AN6445	cicC	Putative aryl-alcohol oxidase-related protein; coregulated with the NRPS/AN6444; encoded within the cichorine gene cluster	AN6445.2	other	1.0949	1.24152	0.0836061
AN6460		Ortholog of A. nidulans FGSC A4 : AN12398, A. oryzae RIB40 : AO090023000067, AO090010000683, Aspergillus wentii : Aspwe1_0075588 and Aspergillus versicolor : Aspve1_0086685	AN6460.2	other	-1.38036	-3.58028	-3.5953		1
AN6464		Has domain(s) with predicted hydrolase activity, hydrolase activity, acting on ester bonds activity and role in lipid metabolic process	AN6464.2	other	1.13322	7.15259	7.24982
AN6470		Protein with lysozyme activity, involved in carbohydrate catabolism	lysozyme (AN6470.2)	other	2.60432	5.04065	3.34141		-1		1
AN6620		Has domain(s) with predicted hydrolase activity, hydrolyzing O-glycosyl compounds activity and role in carbohydrate metabolic process	AN6620.2	other	-1.09778	0.677459	-2.07669
AN6751		Has domain(s) with predicted hydrolase activity, hydrolyzing O-glycosyl compounds activity and role in carbohydrate metabolic process	AN6751.2	other	0.120431	3.19887	0.393694				1
AN6819		Has domain(s) with predicted hydrolase activity, hydrolyzing O-glycosyl compounds activity and role in carbohydrate metabolic process	AN6819.2	other	0.798349	-0.149232	0.404092
AN6833		Ortholog of A. nidulans FGSC A4 : AN6951, AN2710, A. fumigatus Af293 : Afu1g01520, A. oryzae RIB40 : AO090038000445, Neosartorya fischeri NRRL 181 : NFIA_023140 and Aspergillus wentii : Aspwe1_0116569	AN6833.2 (fragment)	other	1.35505	1.32467	1.61514
AN6951		Ortholog of A. nidulans FGSC A4 : AN6833, AN2710, A. fumigatus Af293 : Afu1g01520, A. oryzae RIB40 : AO090038000445, Neosartorya fischeri NRRL 181 : NFIA_023140 and Aspergillus wentii : Aspwe1_0116569	AN6951.2	other	0	0.827421	0
AN7117		Has domain(s) with predicted catalytic activity and role in carbohydrate metabolic process	AN7117.2	other	2.063	10.9433	5.45778		-1		1
AN7158		Has domain(s) with predicted hydrolase activity, hydrolase activity, acting on ester bonds activity and role in lipid metabolic process	AN7158.2	other	-0.725871	-1.54481	-1.22643
AN7241		Ortholog of A. oryzae RIB40 : AO090038000118, Aspergillus flavus NRRL 3357 : AFL2T_08942, Aspergillus versicolor : Aspve1_0133568 and Aspergillus sydowii : Aspsy1_0718256	ANIA_07241	other	1.06152	5.0701	7.14947					1
AN7267		Has domain(s) with predicted flavin adenine dinucleotide binding, oxidoreductase activity, acting on CH-OH group of donors activity and role in oxidation-reduction process	AN7267.2	other	3.53601	2.5223	3.49794		-1
AN7301	alg8	Putative glucosyltransferase; ortholog of S. cerevisiae Alg8p; expression reduced after exposure to farnesol	AN7301.2	other	-0.586907	-0.671884	-0.887409
AN7307		Has domain(s) with predicted catalytic activity	AN7307.2	other	2.13391	3.40913	3.79231		-1
AN7483		Ortholog of A. nidulans FGSC A4 : AN4092, A. fumigatus Af293 : Afu2g05710, A. oryzae RIB40 : AO090001000688, Neosartorya fischeri NRRL 181 : NFIA_082430 and Aspergillus versicolor : Aspve1_0043503	AN7483.2	other	-0.208702	-0.165355	-0.416566
AN7534		Ortholog of A. fumigatus Af293 : Afu1g01380/och4, A. niger CBS 513.88 : An14g07140, An12g07020, Aspergillus versicolor : Aspve1_0085820 and Aspergillus clavatus NRRL 1 : ACLA_033030	AN7534.2	other	-0.337087	-0.847852	-0.688441
AN7535		Ortholog of A. fumigatus Af293 : Afu2g17320, A. oryzae RIB40 : AO090023000622, Neosartorya fischeri NRRL 181 : NFIA_092740 and Aspergillus wentii : Aspwe1_0022988	AN7535.2	other	-0.358155	-0.339752	-0.631863
AN7598		Ortholog of A. fumigatus Af293 : Afu2g15420, Neosartorya fischeri NRRL 181 : NFIA_090660, Aspergillus wentii : Aspwe1_0117646 and Aspergillus versicolor : Aspve1_0073874	AN7598.2	other	3.08792	7.72416	1.48622				1
AN7638		Protein of unknown function	AN7638.2 (fragment)	other	-1.31627	-1.09612	-0.372653
AN7715		Ortholog(s) have dolichyl-phosphate beta-glucosyltransferase activity, role in dolichol-linked oligosaccharide biosynthetic process and endoplasmic reticulum membrane localization	AN7715.2	other	0.064531	0.152996	-0.0265006
AN7735	eglD	Putative endoglucanase; protein localized to the conidial cell wall	AN7735.2 (EglD)	other	-0.888795	-1.25264	-0.214948
AN7794		Has domain(s) with predicted chitin binding activity	AN7794.2	other	-0.514187	-2.04724	-1.58402
AN7812	stcN	Putative versicolorin B synthase with a predicted role in sterigmatocystin/aflatoxin biosynthesis; member of the sterigmatocystin biosynthesis gene cluster	AN7812.2	other	10.8172	11.2205	8.50496		-1
AN7832		Has domain(s) with predicted flavin adenine dinucleotide binding, oxidoreductase activity, acting on CH-OH group of donors activity and role in oxidation-reduction process	AN7832.2	other	-2.16287	-0.383528	-1.2241
AN7871		Has domain(s) with predicted catalytic activity and role in carbohydrate metabolic process	AN7871.2	other	-5.23763	-3.21879	-5.2558		1
AN7915	bglD	Putative glucosidase; member of the F9775 secondary metabolite gene cluster	AN7915.2	other	-2.50403	-3.40619	-6.46966		1			-1
AN7949		Ortholog of A. fumigatus Af293 : Afu7g05200, A. oryzae RIB40 : AO090011000198, AO090003000528, Neosartorya fischeri NRRL 181 : NFIA_026340 and Aspergillus wentii : Aspwe1_0031579	ANIA_07949 (fragment)	other	-2.3852	-2.79932	-2.48567		1
AN7998	xptC	GMC oxidoreductase; glucose oxidase-related protein; involved in a pathway leading to prenyl xanthone (shamixanthone and epishamixanthone) production	AN7998.2	other	1.86032	0.615021	1.18778
AN8135		Ortholog of Aspergillus versicolor : Aspve1_0089071 and Aspergillus sydowii : Aspsy1_0109832	AN8135.2	other	-1.30246	-1.27873	-0.44022
AN8154		Protein of unknown function	AN8154.2	other	0.434695	0.881527	1.81284
AN8175		Has domain(s) with predicted viral capsid localization	ANIA_08175	other	4.49366	6.86776	4.63716		-1		1
AN8266		Ortholog of A. oryzae RIB40 : AO090138000120, Aspergillus flavus NRRL 3357 : AFL2T_08795, Neosartorya fischeri NRRL 181 : NFIA_062350 and Aspergillus versicolor : Aspve1_0047270	AN8266.2	other	-0.134992	1.01799	0.556177
AN8314		Has domain(s) with predicted hydrolase activity	AN8314.2	other	-3.73785	-3.78113	-6.48185		1			-1
AN8367		Ortholog of A. fumigatus Af293 : Afu4g14085, A. niger CBS 513.88 : An12g10420, Neosartorya fischeri NRRL 181 : NFIA_102230 and Aspergillus zonatus : Aspzo1_0100142	AN8367.2	other	-3.37033	-5.40599	-4.10062		1		-1
AN8368		Ortholog of A. nidulans FGSC A4 : AN2952, A. fumigatus Af293 : Afu3g07900, Afu4g14080, Afu8g00900, A. niger CBS 513.88 : An02g11330, An03g05560 and A. oryzae RIB40 : AO090120000471	AN8368.2	other	-1.6058	-2.66985	-1.30422		1		-1
AN8369		Has domain(s) with predicted role in biosynthetic process	AN8369.2	other	-2.16916	-4.46114	-3.83868		1
AN8547	gmcA	Putative glucose-methanol-choline (GMC) oxidoreductase; required for early stages of conidiophore development; intracellular; protein abundance decreased by menadione stress	AN8547.2	other	-1.42313	-1.95714	-0.530571
AN8627		Has domain(s) with predicted transferase activity, transferring glycosyl groups activity and membrane localization	AN8627.2	other	-1.78471	-1.6282	-2.57626		1
AN8677	gfsA	Galactofuranosyltransferase involved in biosynthesis of galactofuranose antigen of cell wall O-glycan	UDP-D-Galf: beta-1,5-/beta-1,6-galactofuranosyltransferase (AN8677)	other	-0.0864496	-0.123374	-0.129725
AN8806		Ortholog(s) have ceramide glucosyltransferase activity and role in ceramide biosynthetic process, filamentous growth, glucosylceramide biosynthetic process, pathogenesis	AN8806.2	other	0.0818421	-0.2555	0.132584
AN8969		Has domain(s) with predicted catalytic activity, lysozyme activity and role in carbohydrate metabolic process, cell wall macromolecule catabolic process, peptidoglycan catabolic process	AN8969.2	other	1.20733	1.70943	0.482052
AN8986		Ortholog of A. oryzae RIB40 : AO090005001017, Aspergillus versicolor : Aspve1_0047420, Aspergillus clavatus NRRL 1 : ACLA_018770 and Aspergillus sydowii : Aspsy1_0051004	AN8986.2	other	-1.82284	-2.69447	1.1502					1
AN9069		Ortholog of A. fumigatus Af293 : Afu7g02500, A. niger CBS 513.88 : An12g00100, A. oryzae RIB40 : AO090038000626, Aspergillus wentii : Aspwe1_0136265 and Aspergillus sydowii : Aspsy1_0061378	AN9069.2	other	0.425909	-0.250848	0.465744
AN9260		Has domain(s) with predicted hydrolase activity, hydrolase activity, acting on ester bonds activity and role in lipid metabolic process	AN9260.2	other	-0.37027	0.431559	1.38223
AN9327		Ortholog(s) have role in ascospore wall assembly, ascospore wall chitin catabolic process	AN9327.2	other	1.07993	2.02246	3.37413		-1			1
AN9329		Protein of unknown function; transcript is induced by nitrate	AN9329.2 (frameshift)	other	-1.31631	1.85326	4.01108
AN9442		Has domain(s) with predicted hydrolase activity, hydrolase activity, acting on ester bonds activity and role in lipid metabolic process	AN9442.2 (fragment)	other	-1.84584	2.20275	0.594796
AN0104		Ortholog(s) have role in protein N-linked glycosylation	AN0104.2 (AlgC)	other	-0.646522	-0.735661	-1.22115
AN5523	tpsA	Putative alpha,alpha-trehalose-phosphate synthase (UDP-forming) with a role in trehalose biosynthesis; transcriptionally induced during spore germination and exponential growth; required for viability of conidia during prolonged storage	alfa,alfa-trehalose-phosphate synthase (TpsA;AN5523.2)	other	0.417945	-0.317073	-0.277068
AN5635	treB	Putative alpha, alpha-trehalase with a predicted role in trehalose hydrolysis	alfa,alfa-trehalase (TreB;AN5635.2)	other	-0.0110158	-0.249089	-0.326574
AN8639		Putative alpha,alpha-trehalose-phosphate synthase (UDP-forming) with a predicted role in trehalose biosynthesis	AN8639.2	other	-2.21241	-5.01774	-5.45255		1
AN9340	treA	Alpha,alpha-trehalase with a role in trehalose hydrolysis; localized to the conidial cell wall; expression upregulated after exposure to farnesol	AN9340.2 (TreA)	other	0.181066	0.47693	1.19977
AN3588		Ortholog(s) have alpha-1,6-mannosyltransferase activity and role in dolichol-linked oligosaccharide biosynthetic process, protein glycosylation	AN3588.2	other	-0.278715	-0.464021	-0.376315
AN4716		Ortholog(s) have alpha-1,6-mannosyltransferase activity	AN4716.2	other	-0.120494	-1.32917	-0.382695
AN4761	pmtB	Subfamily 1 protein O-mannosyltransferase; required for normal hyphal growth and conidiophore development	AN4761.2	other	-0.19574	-0.152683	0.0312476
AN5105	pmtA	Pmt 2 subfamily protein O-mannosyltransferase; required for normal germination, hyphal growth and conidiophore development; mutants are sensitive to growth at high temperature and to cell wall perturbing agents	AN5105.2	other	-0.0738117	-0.483506	-0.598557
AN6534		Putative mannosylinositol phosphorylceramide (MIP2C) synthase with a predicted role in sphingoglycolipid metabolism	AN6534.2 (SurA)	other	-0.693085	-0.845939	-1.06388
AN6571		Ortholog(s) have alpha-1,2-mannosyltransferase activity, role in mannan biosynthetic process, protein glycosylation, protein mannosylation and Golgi apparatus localization	AN6571.2 (fragment)	other	-2.28927	-3.54397	-2.90432		1
AN6857		Ortholog(s) have alpha-1,2-mannosyltransferase activity, role in protein glycosylation and Golgi apparatus localization	AN6857.2	other	-0.91787	-0.900247	-0.792749
AN6874		Putative mannosyltransferase; transcript levels increase during the unfolded-protein response (UPR); S. cerevisiae ortholog Alg2p has glycolipid 6-alpha-mannosyltransferase activity	AN6874.2	other	-1.00499	-1.35472	-0.903257
AN7562		Ortholog(s) have alpha-1,6-mannosyltransferase activity and role in ascospore formation, cell wall mannoprotein biosynthetic process, division septum assembly, protein N-linked glycosylation	AN7562.2	other	0.97564	1.38506	1.5188
AN7672		Ortholog(s) have alpha-1,6-mannosyltransferase activity, mannosyltransferase activity	AN7672.2	other	0.38574	0.110133	1.03953
AN8119		Ortholog(s) have mannosylphosphate transferase activity, mannosyltransferase activity	AN8119.2	other	-0.321129	-0.393126	-0.493719
AN0086		Has domain(s) with predicted mannosyltransferase activity, role in protein glycosylation and membrane localization	AN0086.2	other	-0.161807	-0.214577	-0.184767
AN1459	pmtC	Subfamily 4 protein O-mannosyltransferase; involved in hyphal growth and conidia formation	AN1459.2	other	-0.461156	-0.687376	-0.743165
AN1969		Ortholog(s) have alpha-1,6-mannosyltransferase activity, role in protein N-linked glycosylation, protein glycosylation and alpha-1,6-mannosyltransferase complex localization	AN1969.2	other	1.88807	0.908905	2.83415
AN2303		Ortholog(s) have alpha-1,2-mannosyltransferase activity, dolichyl-phosphate-mannose-glycolipid alpha-mannosyltransferase activity and role in GPI anchor biosynthetic process, fungal-type cell wall biogenesis, plasmid maintenance	AN2303.2	other	0.189607	0.962554	2.45375					1
AN2752		Ortholog(s) have alpha-1,2-mannosyltransferase activity	AN2752.2	other	0.157311	0.663144	0.938892
AN3370		Ortholog(s) have mannosyltransferase activity, role in GPI anchor biosynthetic process, fungal-type cell wall organization, hyphal growth and glycosylphosphatidylinositol-mannosyltransferase I complex localization	AN3370.2 (fragment)	other	0.0131264	0.335376	-0.0497727
AN3531		Putative D-sorbitol dehydrogenase (acceptor) with a predicted role in mannose/mannitol, fructose, and sorbose/sorbitol metabolism	AN3531.2	other	-0.386637	2.38534	-0.0181559				1
All genes			Number of upregulated genes in the group:		81	138	107		29	6	62	16
			Number of downregulated genes in the group:		48	57	59		57	5	4	13
			Number of genes in the group:		317	317	317		317	317	317	317
			Total number of upregulated genes:		1749	2159	2371		918	286	322	433
			Total number of downregulated genes:		1270	1705	1960		1193	69	148	203
			Total number of genes:		10867	10867	10867		10867	10867	10867	10867
			p value for the upregulated genes:		8.081e-06	< 2.2e-16	4.615e-07		0.3534	0.8457	< 2.2e-16	0.1977
			p value for the downregulated genes:		0.0352	0.1449	0.4166		0.0001084	0.05056	0.631	0.006544
alfa-Glucosidase			Number of upregulated genes in the group:		0	4	1		1	0	2	1
			Number of downregulated genes in the group:		2	1	1		0	0	0	0
			Number of genes in the group:		9	9	9		9	9	9	9
			Total number of upregulated genes:		1749	2159	2371		918	286	322	433
			Total number of downregulated genes:		1270	1705	1960		1193	69	148	203
			Total number of genes:		10867	10867	10867		10867	10867	10867	10867
			p value for the upregulated genes:		1	0.08382	0.891		0.5483	1	0.02746	0.3066
			p value for the downregulated genes:		0.2841	0.7849	0.8332		1	1	1	1
beta-Glucosidase			Number of upregulated genes in the group:		4	8	5		1	0	5	0
			Number of downregulated genes in the group:		2	2	2		4	1	0	1
			Number of genes in the group:		13	13	13		13	13	13	13
			Total number of upregulated genes:		1749	2159	2371		918	286	322	433
			Total number of downregulated genes:		1270	1705	1960		1193	69	148	203
			Total number of genes:		10867	10867	10867		10867	10867	10867	10867
			p value for the upregulated genes:		0.1436	0.001181	0.1332		0.6827	1	2.343e-05	1
			p value for the downregulated genes:		0.4594	0.6283	0.7093		0.04597	0.07951	1	0.2175
beta-1,4-Endoglucanase			Number of upregulated genes in the group:		5	7	2		4	0	5	1
			Number of downregulated genes in the group:		4	4	5		1	0	0	3
			Number of genes in the group:		14	14	14		14	14	14	14
			Total number of upregulated genes:		1749	2159	2371		918	286	322	433
			Total number of downregulated genes:		1270	1705	1960		1193	69	148	203
			Total number of genes:		10867	10867	10867		10867	10867	10867	10867
			p value for the upregulated genes:		0.06061	0.01114	0.8438		0.02549	1	3.557e-05	0.4342
			p value for the downregulated genes:		0.07133	0.1652	0.0912		0.8039	1	1	0.002008
Cellobiosidase and cellobiose dehydrogenase			Number of upregulated genes in the group:		2	4	1		0	0	4	0
			Number of downregulated genes in the group:		1	0	1		1	0	0	1
			Number of genes in the group:		5	5	5		5	5	5	5
			Total number of upregulated genes:		1749	2159	2371		918	286	322	433
			Total number of downregulated genes:		1270	1705	1960		1193	69	148	203
			Total number of genes:		10867	10867	10867		10867	10867	10867	10867
			p value for the upregulated genes:		0.1853	0.006539	0.708		1	1	3.696e-06	1
			p value for the downregulated genes:		0.4629	1	0.6302		0.441	1	1	0.08999
alfa-Galactosidase			Number of upregulated genes in the group:		5	5	2		0	3	1	0
			Number of downregulated genes in the group:		0	1	0		2	0	1	0
			Number of genes in the group:		7	7	7		7	7	7	7
			Total number of upregulated genes:		1749	2159	2371		918	286	322	433
			Total number of downregulated genes:		1270	1705	1960		1193	69	148	203
			Total number of genes:		10867	10867	10867		10867	10867	10867	10867
			p value for the upregulated genes:		0.001695	0.004518	0.4727		1	0.0005837	0.1899	1
			p value for the downregulated genes:		1	0.6973	1		0.1744	1	0.09155	1
beta-Galactosidase			Number of upregulated genes in the group:		5	6	3		0	1	2	0
			Number of downregulated genes in the group:		0	0	0		2	0	0	0
			Number of genes in the group:		7	7	7		7	7	7	7
			Total number of upregulated genes:		1749	2159	2371		918	286	322	433
			Total number of downregulated genes:		1270	1705	1960		1193	69	148	203
			Total number of genes:		10867	10867	10867		10867	10867	10867	10867
			p value for the upregulated genes:		0.001695	0.0003554	0.1806		1	0.1703	0.01666	1
			p value for the downregulated genes:		1	1	1		0.1744	1	1	1
Arabinofuranosidase and endo-arabinosidase			Number of upregulated genes in the group:		5	10	6		1	0	7	0
			Number of downregulated genes in the group:		2	1	3		5	1	0	1
			Number of genes in the group:		14	14	14		14	14	14	14
			Total number of upregulated genes:		1749	2159	2371		918	286	322	433
			Total number of downregulated genes:		1270	1705	1960		1193	69	148	203
			Total number of genes:		10867	10867	10867		10867	10867	10867	10867
			p value for the upregulated genes:		0.06061	4.276e-05	0.0638		0.7096	1	5.395e-08	1
			p value for the downregulated genes:		0.4994	0.9085	0.4759		0.01355	0.08536	1	0.2321
Xylanase			Number of upregulated genes in the group:		2	3	2		0	0	3	1
			Number of downregulated genes in the group:		0	1	0		1	0	0	0
			Number of genes in the group:		5	5	5		5	5	5	5
			Total number of upregulated genes:		1749	2159	2371		918	286	322	433
			Total number of downregulated genes:		1270	1705	1960		1193	69	148	203
			Total number of genes:		10867	10867	10867		10867	10867	10867	10867
			p value for the upregulated genes:		0.1853	0.05687	0.3003		1	1	0.0002466	0.184
			p value for the downregulated genes:		1	0.5741	1		0.441	1	1	1
Xylosidase			Number of upregulated genes in the group:		10	11	7		0	1	8	0
			Number of downregulated genes in the group:		0	0	1		7	0	0	1
			Number of genes in the group:		12	12	12		12	12	12	12
			Total number of upregulated genes:		1749	2159	2371		918	286	322	433
			Total number of downregulated genes:		1270	1705	1960		1193	69	148	203
			Total number of genes:		10867	10867	10867		10867	10867	10867	10867
			p value for the upregulated genes:		5.5e-07	1.832e-07	0.006494		1	0.274	2.435e-10	1
			p value for the downregulated genes:		1	1	0.9082		9.084e-05	1	1	0.2026
Galacturonan degradation			Number of upregulated genes in the group:		4	12	11		1	0	4	2
			Number of downregulated genes in the group:		3	1	3		4	1	0	1
			Number of genes in the group:		24	24	24		24	24	24	24
			Total number of upregulated genes:		1749	2159	2371		918	286	322	433
			Total number of downregulated genes:		1270	1705	1960		1193	69	148	203
			Total number of genes:		10867	10867	10867		10867	10867	10867	10867
			p value for the upregulated genes:		0.5548	0.0009063	0.007543		0.88	1	0.00503	0.2477
			p value for the downregulated genes:		0.5438	0.9834	0.8343		0.2664	0.1419	1	0.3643
Rhamnogalacturonan degradation			Number of upregulated genes in the group:		8	12	12		0	1	3	1
			Number of downregulated genes in the group:		0	0	0		7	0	0	0
			Number of genes in the group:		16	16	16		16	16	16	16
			Total number of upregulated genes:		1749	2159	2371		918	286	322	433
			Total number of downregulated genes:		1270	1705	1960		1193	69	148	203
			Total number of genes:		10867	10867	10867		10867	10867	10867	10867
			p value for the upregulated genes:		0.001688	3.004e-06	8.481e-06		1	0.3476	0.01084	0.4785
			p value for the downregulated genes:		1	1	1		0.0008821	1	1	1
Mannan degradation			Number of upregulated genes in the group:		5	9	6		1	0	4	0
			Number of downregulated genes in the group:		1	3	4		3	0	0	1
			Number of genes in the group:		19	19	19		19	19	19	19
			Total number of upregulated genes:		1749	2159	2371		918	286	322	433
			Total number of downregulated genes:		1270	1705	1960		1193	69	148	203
			Total number of genes:		10867	10867	10867		10867	10867	10867	10867
			p value for the upregulated genes:		0.1792	0.006316	0.2189		0.8133	1	0.002061	1
			p value for the downregulated genes:		0.9059	0.5917	0.4566		0.3476	1	1	0.3013

## Sheet: Sheet 2
	Transcriptome data (log2FC values) of "Antioxidant enzyme", "Squalene - ergosterol pathway", "Ribosome biogenesis", "Mitotic cell cycle" and "Transcription factor" genes.
	Red and blue colors indicate upregulated and downregulated genes, respectively.
	Significant enrichment (Fisher's exact test, p < 0.05) of genes belonging to a term in a gene set is highlighted with yellow.
	a - According to Aspergillus Genome Database (http://www.aspgd.org/).
	b - According to the reference(s) mentioned at the definition of the appropriate gene group in the Materials and methods chapter of the manuscript.
Antioxidant enzyme genes
GENEID	Gene namea	Featurea	Descriptionb	log2FC values				Regulation (up=1, down=-1)
				Lactose containing cultures	Arabinogalactan containing cultures	Carbon starved cultures		Culture specific gene
				vs.	vs.	vs.		Glucose	Lactose	Arabinogalactan	No carbon source
				Glucose containing cultures	Glucose containing cultures	Glucose containing cultures
AN0241	sodA	Cu/Zn-superoxide dismutase; induced under iron starvation and repressed under copper starvation	Cu/Zn-superoxide dismutase	0.343528	-0.289943	-1.4307					-1
AN5577	sodB	Manganese-superoxide dismutase	Mn-superoxide dismutase	-0.537411	-0.807207	-0.685104
AN1131		Putative cytosolic Cu/Zn superoxide dismutase; transcript repressed by light in developmentally competent mycelia	Cu/Zn-superoxide dismutase	0.703798	0.829832	2.75866					1
AN0785	sodM	Putative manganese superoxide dismutase	Mn-superoxide dismutase	2.94504	3.01803	2.86789		-1
AN8637	catA	Conidia-specific catalase; predicted role in gluconic acid and gluconate metabolism	catalase	-1.79694	-2.00777	-1.69877		1
AN9339	catB	Hyphal catalase with a predicted role in gluconic acid and gluconate metabolism	catalase	-2.6961	-3.55509	-4.17767		1
AN5918	catC	Putative catalase with a predicted role in gluconic acid and gluconate metabolism	catalase	0.622501	0.893823	1.24835
AN8553		Putative catalase with a predicted role in gluconic acid and gluconate metabolism	catalase	-0.352564	-0.661841	-0.104362
AN7388	cpeA/catD	Putative catalase-peroxidase with a predicted role in gluconic acid and gluconate metabolism; protein also identified as laccase II which is expressed during sexual development	catalase-peroxidase	4.60759	5.29515	4.96796		-1
AN10220	ccp1	Putatice cytochrome c peroxidase; intracellular; protein abundance decreased by menadione stress	cytochrome c peroxidase	-0.545885	-0.926654	-1.68334
AN5440		Putative cytochrome c peroxidase; expression upregulated after exposure to farnesol	cytochrome c peroxidase	0.63344	2.26784	1.79877
AN7924		Has domain(s) with predicted peroxidase activity	peroxidase	0.179682	1.13953	1.94329
AN8395		Has domain(s) with predicted peroxidase activity	peroxidase	0.406448	0.139557	-0.622065
AN2578		Has domain(s) with predicted peroxidase activity	peroxidase	-3.22887	-3.92895	-4.87298		1
AN6457		Has domain(s) with predicted peroxidase activity	peroxidase	0.391738	-0.126465	-0.323557
AN9464		Has domain(s) with predicted electron transfer activity, protein disulfide oxidoreductase activity and role in cell redox homeostasis	glutaredoxin	-0.130581	-0.116175	0.0802234
AN4215		Ortholog(s) have disulfide oxidoreductase activity, glutathione disulfide oxidoreductase activity, glutathione peroxidase activity, glutathione transferase activity	glutaredoxin	-0.345657	-0.516455	-0.674523
AN4304		Ortholog(s) have 2 iron, 2 sulfur cluster binding, disulfide oxidoreductase activity, glutathione disulfide oxidoreductase activity	glutaredoxin	-0.319362	-0.44307	-0.502788
AN7567		Ortholog(s) have 2 iron, 2 sulfur cluster binding, RNA polymerase II activating transcription factor binding, disulfide oxidoreductase activity, glutathione disulfide oxidoreductase activity, iron-sulfur cluster binding activity	glutaredoxin	-0.61202	-0.642269	-1.06632
AN2846	gpxA	Putative glutathione peroxidase with a predicted role in glutathione biosynthesis; protein induced by farnesol	glutathione peroxidase	-0.0500425	-0.2512	-0.478828
AN0629		Ortholog(s) have glutathione peroxidase activity, glutathione transferase activity, role in glutathione metabolic process, protein glutathionylation and cytoplasm, endoplasmic reticulum localization	glutathione peroxidase/S-transferase	0.153057	0.574389	0.40715
AN0932	glrA	Putative glutathione oxidoreductase with a predicted role in glutathione biosynthesis	glutathione reductase	-0.432545	-0.635728	-0.858489
AN10223	tpxA	Putative 1-Cys peroxiredoxin; intracellular; protein abundance decreased by menadione stress; expression reduced after exposure to farnesol	peroxiredoxin	-0.635588	-1.64816	-2.61897
AN3973	tpxB	Putative peroxiredoxin	peroxiredoxin	-1.40681	-2.05889	-2.84892		1
AN1252		Has domain(s) with predicted peroxiredoxin activity and role in oxidation-reduction process	peroxiredoxin	-1.79316	-0.867931	-1.24054
AN4023		Has domain(s) with predicted peroxiredoxin activity and role in oxidation-reduction process	peroxiredoxin	-0.215423	0.42096	-0.929396
AN5232		Has domain(s) with predicted peroxiredoxin activity and role in oxidation-reduction process	peroxiredoxin	-0.459518	-0.519781	-0.83392
AN8080		Ortholog(s) have thioredoxin peroxidase activity, role in cell redox homeostasis, cellular response to oxidative stress, response to metal ion and cytoplasm, hyphal cell wall, intracellular, peroxisome, yeast-form cell wall localization	thioredoxin peroxidase	0.108489	-0.647563	-1.31661
AN8218	trxB	Putative thioredoxin reductase	thioredoxin reductase	2.2861	2.4318	0.887428
AN3581	trxR	Thioredoxin reductase with a predicted role in pyrimidine metabolism; putative flavoprotein; intracellular, menadione stress-induced protein; transcripts of two different sizes have been detected	thioredoxin reductase	-0.636678	-0.712623	-1.37795
AN0170	trxA	Thioredoxin; predicted role in cell redox homeostasis; required for conidiation; expression upregulated after exposure to farnesol	thioredoxin	-1.35809	-2.27811	-2.45581		1
AN8692	prxA	Thioredoxin-dependent peroxidase; intracellular; PRX5-like domain; highly similar to the allergen Aspf3 from related fungi; menadione stress-repressed protein; osmoadaptation-induced protein; repressed by starvation-induced autophagy	thioredoxin peroxidase	-2.2862	-2.27031	-3.55458		1			-1
			Number of upregulated genes in the group:	3	5	6		6	0	0	1
			Number of downregulated genes in the group:	7	7	13		2	0	0	2
			Number of genes in the group:	32	32	32		32	32	32	32
			Total number of upregulated genes:	1749	2159	2371		918	286	322	433
			Total number of downregulated genes:	1270	1705	1960		1193	69	148	203
			Total number of genes:	10867	10867	10867		10867	10867	10867	10867
			p value for the upregulated genes:	0.9079	0.7908	0.7288		0.0486	1	1	0.7283
			p value for the downregulated genes:	0.07229	0.2274	0.00234		0.8806	1	1	0.1197
Squalene - ergosterol pathway genes
GENEID	Gene namea	Featurea	Descriptionb	log2FC values				Regulation (up=1, down=-1)
				Lactose containing cultures	Arabinogalactan containing cultures	Carbon starved cultures		Culture specific gene
				vs.	vs.	vs.		Glucose	Lactose	Arabinogalactan	No carbon source
				Glucose containing cultures	Glucose containing cultures	Glucose containing cultures
AN0451		Putative C-8 sterol isomerase with a predicted role in sterol metabolism	erg2	-1.60398	-2.00048	-2.68983		1
AN10648		Ortholog(s) have delta24(24-1) sterol reductase activity, role in ergosterol biosynthetic process and endoplasmic reticulum localization	erg4 (erg4B)	-0.763945	-0.821204	-1.3944
AN11008		Ortholog(s) have drug binding, squalene monooxygenase activity	erg1	-2.90308	-4.73397	-4.81404		1
AN11065		Putative oxidosqualene-lanosterol cyclase with a predicted role in ergosterol metabolism	erg7 (erg7A), erg7B and erg7C	-0.452117	-0.0181817	-0.769607
AN11081		Has domain(s) with predicted 3-beta-hydroxy-delta5-steroid dehydrogenase activity and role in oxidation-reduction process, steroid biosynthetic process	erg26	1.98505	-0.490775	0.210736			1
AN1147		Ortholog of A. fumigatus Af293 : Afu1g11500/erg27, A. niger CBS 513.88 : An08g03620, Aspergillus wentii : Aspwe1_0172221, Aspergillus sydowii : Aspsy1_0053214 and Aspergillus terreus NIH2624 : ATET_00340	erg27	-0.774512	-1.70971	-1.06107
AN1901	pdmA	Putative sterol 14 alpha-demethylase with a predicted role in sterol metabolism	cyp51A and cyp51B	-1.40058	-3.10824	-2.92438		1
AN2684		Putative oxidoreductase with a predicted role in sterol metabolism	erg4A	0.915853	0.702999	0.586319
AN4042	CYP61A1	Putative C-22 sterol desaturase with a predicted role in sterol metabolism; putative cytochrome P450	erg5	-0.843582	-1.62958	-2.16609
AN4094		Putative C-14 sterol reductase with a predicted role in sterol metabolism	erg24 (erg24A) and erg24B	-1.15835	-2.01638	-2.49992		1
AN6506		Putative C-4 sterol methyl oxidase with a predicted role in sterol metabolism	erg3A, erg3B and erg3C	-1.4271	-2.69139	-3.00707		1
AN6973		Putative C-4 sterol methyl oxidase with a predicted role in sterol metabolism; expression reduced after exposure to farnesol	erg25 (erg25A) and erg25B	-1.40368	-3.25528	-3.48785		1
AN7146		Putative S-adenosyl-methionine delta-24-sterol-C-methyltransferase with a predicted role in sterol metabolism	erg6	-1.04181	-0.758349	-1.29275
AN7575		Putative C-3 sterol dehydrogenase with a predicted role in sterol metabolism	erg26	0.0259219	-0.026337	0.0847532
AN8283	cyp51B	Putative sterol 14-demethylase with a predicted role in sterol metabolism; putative cytochrome P450	cyp51A and cyp51B	-0.691558	-0.866091	-1.41299
AN8907		Putative C-4 sterol methyl oxidase with a predicted role in sterol metabolism	erg25 (erg25A) and erg25B	-2.75288	-6.6392	-7.77523		1			-1
			Number of upregulated genes in the group:	1	0	0		7	1	0	0
			Number of downregulated genes in the group:	8	9	12		0	0	0	1
			Number of genes in the group:	16	16	16		16	16	16	16
			Total number of upregulated genes:	1749	2159	2371		918	286	322	433
			Total number of downregulated genes:	1270	1705	1960		1193	69	148	203
			Total number of genes:	10867	10867	10867		10867	10867	10867	10867
			p value for the upregulated genes:	0.9398	1	1		0.0001738	0.3476	1	1
			p value for the downregulated genes:	0.0001844	0.0002255	1.018e-06		1	1	1	0.2606
Ribosome biogenesis genes
GENEID	Gene namea	Featurea	Descriptionb	log2FC values				Regulation (up=1, down=-1)
				Lactose containing cultures	Arabinogalactan containing cultures	Carbon starved cultures		Culture specific gene
				vs.	vs.	vs.		Glucose	Lactose	Arabinogalactan	No carbon source
				Glucose containing cultures	Glucose containing cultures	Glucose containing cultures
AN0074		Ortholog(s) have role in nuclear division, rRNA processing, ribosomal large subunit biogenesis and nuclear periphery, nucleolus, preribosome, large subunit precursor localization		-0.271298	0.117825	-0.56851
AN0092		Putative methyltransferase with a predicted role in histidine metabolism		-0.070068	0.220871	-0.37282
AN0124	rio2	Essential protein kinase;, role in maturation of SSU-rRNA from tricistronic rRNA transcript (SSU-rRNA, 5.8S rRNA, LSU-rRNA); null mutants arrest as short germlings		0.363253	0.57819	0.217063
AN0133		Putative mRNA splicing factor ATP-dependent RNA helicase; ortholog of S. cerevisiae Prp43p; expression reduced after exposure to farnesol		-0.187219	-0.029891	-0.387462
AN0189		Ortholog(s) have role in endonucleolytic cleavage in ITS1 to separate SSU-rRNA from 5.8S rRNA and LSU-rRNA from tricistronic rRNA transcript (SSU-rRNA, 5.8S rRNA, LSU-rRNA), endonucleolytic cleavage involved in tRNA processing		-0.253704	0.0590664	0.393365
AN0237		Ortholog(s) have role in maturation of 5.8S rRNA from tricistronic rRNA transcript (SSU-rRNA, 5.8S rRNA, LSU-rRNA), maturation of LSU-rRNA from tricistronic rRNA transcript (SSU-rRNA, 5.8S rRNA, LSU-rRNA) and nucleolus localization		-0.107356	0.0588398	-0.113459
AN0247		Ortholog(s) have rRNA cytidine N-acetyltransferase activity, snoRNA binding, tRNA binding activity and role in rRNA acetylation involved in maturation of SSU-rRNA, ribosomal small subunit biogenesis		-0.299765	0.124974	-0.654479
AN0262		Ortholog(s) have role in ribosomal large subunit assembly and cytosolic large ribosomal subunit localization		-0.930025	-0.796651	-1.2821
AN0305		Ortholog(s) have U3 snoRNA binding activity		-0.371294	-0.0493121	-0.72262
AN0327		Ortholog(s) have 3'-5' DNA helicase activity, 5'-3' DNA helicase activity		-0.370574	-0.254918	-0.583483
AN0410	bimG	Essential protein phosphatase required for the completion of anaphase; uORF encoded in the upstream leader sequence		0.404693	0.277224	0.195053
AN0421		Ortholog(s) have rRNA primary transcript binding activity		-0.0992159	-0.17417	-1.04566
AN0465		Ortholog of S. cerevisiae RPS8A and RPS8B; palA-dependent expression independent of pH		-0.850818	-0.858472	-1.18409
AN0475		Putative ortholog of S. cerevisiae Utp14p; expression reduced after exposure to farnesol		-0.539789	-0.569975	-1.02511
AN0647		Ortholog(s) have rRNA primary transcript binding, single-stranded telomeric DNA binding, snoRNA binding activity, role in rRNA processing, ribosomal small subunit biogenesis and Mpp10 complex, small-subunit processome localization		-0.245161	0.0501825	-0.529182
AN0685		Ortholog(s) have rRNA (uridine-N3-)-methyltransferase activity, role in rRNA base methylation and cytoplasm localization		-0.368381	-0.162255	-0.159923
AN0695		Putative snoRNP component with a predicted role in ribosomal RNA pseudouridinylation; ortholog of S. cerevisiae Nhp2p; expression reduced after exposure to farnesol		-0.4377	0.0286206	-0.922242
AN0707		Ortholog(s) have 5'-3' exoribonuclease activity, microtubule binding, rRNA binding, recombinase activity		0.0860772	0.0615867	0.120601
AN0728		Has domain(s) with predicted snoRNA binding activity and role in ribosome biogenesis, snRNA pseudouridine synthesis		0.32524	0.610497	-0.114439
AN0745		Putative nucleolar protein; ortholog of S. cerevisiae Nop1p; related to mammalian fibrillarin; expression reduced after exposure to farnesol		-0.624252	-0.514314	-1.45008
AN0767		Ortholog(s) have RNA binding, poly(U) RNA binding activity and role in mRNA splicing, via spliceosome, maturation of SSU-rRNA, nuclear-transcribed mRNA catabolic process		0.361497	0.270498	0.14906
AN0796		Has domain(s) with predicted role in rRNA processing and small-subunit processome localization		0.149751	0.434196	0.073224
AN0843		Ortholog(s) have structural constituent of ribosome activity, role in rRNA export from nucleus and cytosolic small ribosomal subunit, membrane localization		-0.864151	-0.869472	-1.30952
AN0946		Ortholog(s) have role in cellular response to biotic stimulus, cellular response to drug, cellular response to starvation and filamentous growth, more		-0.145049	-0.0594979	-0.731128
AN10058		Ortholog(s) have role in cellular response to drug, protein-RNA complex remodeling, ribosomal large subunit assembly and nucleolus localization		0.0383635	0.361296	-0.0929909
AN1013		Putative 60S ribosomal protein L5; ortholog of S. cerevisiae Rpl5p which is an RNA binding protein with a role in ribosomal large subunit assembly		-0.912349	-0.963344	-1.49046
AN10175		Ortholog(s) have role in ribosome biogenesis and cytosol localization		-0.455396	-0.280912	-0.264767
AN10200	rpf2	Ribosome assembly factor; component of the Rpf2-Rrs1 complex; ortholog of S. cerevisiae Rpf2p; expression reduced after exposure to farnesol		-0.210732	0.14076	-0.419986
AN10348		Ortholog(s) have 3'-5'-exoribonuclease activity		0.113111	-0.0578852	-0.10532
AN10352		Ortholog(s) have role in rRNA processing and box C/D snoRNP complex, nucleolus, small-subunit processome localization		-0.495068	-0.205395	-0.957831
AN10618		Ortholog(s) have RNA binding activity		-0.250405	-0.331185	-1.25684
AN10712		Has domain(s) with predicted pseudouridine synthase activity, snoRNA binding activity, role in ribosome biogenesis, snRNA pseudouridine synthesis and box H/ACA snoRNP complex localization		-0.635166	-0.556833	-1.00115
AN10719		Ortholog(s) have RNA binding, poly(U) RNA binding activity and role in mRNA splicing, via spliceosome, maturation of SSU-rRNA		-0.18057	0.264379	0.335468
AN10721		Ortholog(s) have protein methyltransferase activity, rRNA (guanine) methyltransferase activity, tRNA (guanine-N2-)-methyltransferase activity		0.238241	0.225227	0.56511
AN10865		Ortholog(s) have endoribonuclease activity		0.828553	0.325058	-0.229895
AN10940		Ortholog(s) have rRNA (uridine-2'-O-)-methyltransferase activity, role in rRNA methylation and mitochondrion localization		-0.345101	-0.203988	-0.197707
AN10943		Ortholog(s) have rRNA binding activity, role in maturation of LSU-rRNA from tricistronic rRNA transcript (SSU-rRNA, 5.8S rRNA, LSU-rRNA), rRNA processing, ribosomal large subunit export from nucleus and nucleolus, nucleus localization		0.0264185	0.208745	-0.479637
AN10955		Ortholog(s) have role in rRNA processing, ribosomal large subunit assembly		0.00917229	0.310283	0.0597513
AN11145	cgrA	Functional ortholog of S. cerevisiae CGR1; nucleolar protein with a predicted role in ribosome biogenesis and rRNA processing		0.128983	0.584638	-0.209555
AN11224		Ortholog(s) have RNA stem-loop binding, double-stranded RNA binding, double-stranded RNA-specific ribonuclease activity, ribonuclease III activity		0.203889	0.192665	0.439443
AN11250		Ortholog(s) have role in exonucleolytic trimming to generate mature 3'-end of 5.8S rRNA from tricistronic rRNA transcript (SSU-rRNA, 5.8S rRNA, LSU-rRNA) and mRNA processing, more		0.260142	0.782877	1.33853
AN1166		Ortholog(s) have RNA binding, structural constituent of ribosome activity		-0.928366	-1.00245	-1.29382
AN1175		Has domain(s) with predicted role in rRNA processing and preribosome, small subunit precursor localization		-0.467285	-0.319021	-0.793449
AN11773		Ortholog(s) have 3'-5'-exoribonuclease activity, exoribonuclease activity		-0.403551	-0.171829	-0.621244
AN11929		Ortholog(s) have rRNA binding activity, role in rRNA processing, ribosomal small subunit assembly and CURI complex, UTP-C complex localization		0.287655	0.429837	0.46623
AN1200		Ortholog(s) have role in cellular response to drug, ribosomal large subunit assembly, ribosomal large subunit biogenesis and Noc1p-Noc2p complex, nucleolus, preribosome, large subunit precursor localization		-0.705974	-0.856969	-1.50382
AN1215		Putative GTPase; S. cerevisiae ortholog Nug1p has role in rRNA processing; expression reduced after exposure to farnesol		0.116754	0.332909	-0.53435
AN1228		Ortholog(s) have role in maturation of LSU-rRNA from tricistronic rRNA transcript (SSU-rRNA, 5.8S rRNA, LSU-rRNA) and cytosolic large ribosomal subunit, preribosome, large subunit precursor localization		-0.94807	-0.866809	-1.16721
AN12473	hscA	Putative heat shock protein		-0.821214	-0.694664	-1.27319
AN1319		Ortholog(s) have RNA binding, U3 snoRNA binding, U4 snRNA binding activity		-0.610971	-0.34072	-0.527558
AN1345		Ortholog(s) have structural constituent of ribosome activity		-0.81079	-0.690459	-0.865181
AN1367	bop1	Putative WD40 repeat nucleolar protein; ortholog of S. cerevisiae Erb1p which has role in rRNA processing and ribosomal large subunit biogenesis; expression reduced after exposure to farnesol		-0.22607	-0.0663096	-0.810023
AN1434		Ortholog(s) have U3 snoRNA binding activity		0.0459362	0.647493	1.3315
AN1474		Has domain(s) with predicted role in ribosome biogenesis and nucleolus localization		-0.230349	0.160338	-1.08642
AN1533		Ortholog(s) have role in cellular response to drug, endonucleolytic cleavage in 5'-ETS of tricistronic rRNA transcript (SSU-rRNA, 5.8S rRNA and LSU-rRNA), more		-0.105705	-0.213398	-0.578687
AN1666		Putative nucleolar GTPase; ortholog of S. cerevisiae NOG2 which has role in ribosomal large subunit export from nucleus; expression reduced after exposure to farnesol		-0.0763839	0.0672306	-0.763554
AN1711		Ortholog(s) have large ribosomal subunit rRNA binding, ribosomal large subunit binding activity, role in ribosomal large subunit export from nucleus and cytosol localization		0.145026	0.624811	0.0143984
AN1875		Ortholog(s) have role in budding cell bud growth, mitotic cell cycle, nucleocytoplasmic transport, ribosomal large subunit biogenesis and cytoplasm, preribosome, large subunit precursor localization		0.301224	0.662292	0.660382
AN1949		Ortholog(s) have RNA binding, RNA helicase activity, RNA-dependent ATPase activity		0.0737359	0.414739	-0.451764
AN1957		Putative methyltransferase with a predicted role in histidine metabolism		-0.228287	-0.032119	-0.688282
AN1964		Ortholog of S. cerevisiae RPS6B and RPS6A; palA-dependent expression independent of pH		-1.02853	-1.1125	-1.73149		1
AN2079		Ortholog(s) have role in maturation of SSU-rRNA from tricistronic rRNA transcript (SSU-rRNA, 5.8S rRNA, LSU-rRNA)		-0.382054	-0.0506328	-0.502681
AN2210		Probable ABC-transporter; transcript upregulated in response to camptothecin		0.0737492	0.20184	-0.474013
AN2262		Ortholog(s) have role in ATP export, cellular response to oxidative stress, response to osmotic stress, ribosomal small subunit biogenesis, ribosomal small subunit export from nucleus		0.327549	0.577851	-0.110922
AN2263		Ortholog(s) have role in ribosomal large subunit assembly, ribosomal subunit export from nucleus and cytoplasm, cytosolic large ribosomal subunit localization		0.508286	0.747445	0.293283
AN2292		Ortholog(s) have role in maturation of SSU-rRNA from tricistronic rRNA transcript (SSU-rRNA, 5.8S rRNA, LSU-rRNA) and nucleolus localization		-0.0259778	0.527644	-0.0390857
AN2437		Ortholog(s) have RNA binding, ribonuclease MRP activity, ribonuclease P activity		-1.39122	-1.32082	-1.15812		1
AN2734		Ortholog(s) have large ribosomal subunit rRNA binding, structural constituent of ribosome activity, role in cytoplasmic translation, ribosomal large subunit assembly and cytoplasm, cytosolic large ribosomal subunit localization		-1.02503	-0.974101	-1.59999
AN2737	mexA	Ortholog(s) have RNA binding activity and role in mRNA export from nucleus, poly(A)+ mRNA export from nucleus, ribosomal large subunit export from nucleus, ribosomal small subunit export from nucleus		-0.0897274	-0.22844	-0.376194
AN2759		Ortholog(s) have rRNA (pseudouridine) methyltransferase activity		0.254121	0.181606	0.539054
AN2926	nsa2	Putative 60S ribosomal protein; transcript repressed by light in developmentally competent mycelia		0.0882749	0.405892	0.182496
AN3056		Ortholog(s) have role in maturation of SSU-rRNA		0.0653304	0.544016	-0.204517
AN3096	rmtB	Putative transferase with a predicted role in histidine metabolism; arginine methyltransferase for histones H4, H3, and H2A		0.138595	0.0868423	-0.368242
AN3167	nop58	Putative ribosome biogenesis protein; ortholog of S. cerevisiae Nop58p; expression reduced after exposure to farnesol		-0.552921	-0.312567	-1.21025
AN3172		Ortholog of S. cerevisiae RPS0A and RPS0B; expression reduced after exposure to farnesol		-0.93376	-0.802218	-1.54405
AN3313		Putative methyltransferase with a predicted role in histidine metabolism; ribosomal RNA adenine dimethylase; expression reduced after exposure to farnesol		-0.29662	-0.0717217	-0.768068
AN3413		Protein with homology to ribosomal protein S2 and S5; ortholog of S. cerevisiae Rps2p; expression reduced after exposure to farnesol		-0.859088	-0.823441	-1.24366
AN3455		Ortholog(s) have role in rRNA processing, response to drug, tRNA export from nucleus and CURI complex, UTP-C complex, nucleolus, small-subunit processome localization		-0.582472	-0.443049	-0.975586
AN3657		Ortholog(s) have 3'-5'-exoribonuclease activity, Ran GTPase binding, endoribonuclease activity, exoribonuclease activity, ribonuclease activity, tRNA binding activity		-0.492668	-0.482626	-0.632783
AN3706		S. cerevisiae ortholog RPS10A has role in rRNA export from nucleus; palA-dependent expression independent of pH		-0.978288	-0.850895	-1.3997
AN3745	rrs1	Ribosome assembly factor; component of the Rpf2-Rrs1 complex		-0.0159896	0.628131	-0.147578
AN3812		Ortholog(s) have role in U1 snRNA 3'-end processing, U4 snRNA 3'-end processing and U5 snRNA 3'-end processing, more		-0.186488	0.0413089	-0.14333
AN3823		Ortholog(s) have structural constituent of ribosome activity		-0.726573	-0.598364	-0.731775
AN3827		Ortholog(s) have nucleolus localization		-0.295892	0.140834	-1.00493
AN4060	rps16	Putative ribosomal protein S16		-0.824038	-0.747562	-1.03468
AN4087		Putative 40S ribosomal protein subunit; ortholog of S. cerevisiae Rps3p; expression reduced after exposure to farnesol		-0.859275	-0.839236	-1.26874
AN4226		Ortholog(s) have role in maturation of SSU-rRNA from tricistronic rRNA transcript (SSU-rRNA, 5.8S rRNA, LSU-rRNA) and nucleolus, small-subunit processome localization		-0.0637242	0.133743	-0.323603
AN4232		Ortholog(s) have rRNA binding activity, role in maturation of LSU-rRNA from tricistronic rRNA transcript (SSU-rRNA, 5.8S rRNA, LSU-rRNA), ribosomal large subunit assembly and nucleolus, preribosome, large subunit precursor localization		-0.0881677	0.14969	-0.255474
AN4298		Ortholog(s) have role in endonucleolytic cleavage in 5'-ETS of tricistronic rRNA transcript (SSU-rRNA, 5.8S rRNA and LSU-rRNA), more		0.237222	0.280899	-0.081647
AN4419		Ortholog(s) have preribosome binding, protein tyrosine phosphatase activity		0.472749	0.787617	0.0608147
AN4460		Putative 18S rRNA processing complex subunit; locus contains the conserved upstream open reading frame (uORF) AN4460-uORF		-0.526222	-0.231112	0.167943
AN4469		Ortholog(s) have role in cellular response to biotic stimulus, cellular response to starvation, chromosome organization and filamentous growth, more		-0.417232	-0.163484	-1.38269
AN4471		Ortholog(s) have role in maturation of 5.8S rRNA from tricistronic rRNA transcript (SSU-rRNA, 5.8S rRNA, LSU-rRNA), maturation of LSU-rRNA from tricistronic rRNA transcript (SSU-rRNA, 5.8S rRNA and LSU-rRNA), more		-0.106735	0.0571166	-0.59923
AN4475		Ortholog(s) have role in ribosomal large subunit assembly and cytosolic large ribosomal subunit localization		-1.05045	-0.938476	-1.39935
AN4560		Putative 60s ribosomal protein; ortholog of S. cerevisiae Rlp24p; expression reduced after exposure to farnesol		-0.0601504	0.253036	-0.51336
AN4594		Ortholog(s) have role in maturation of SSU-rRNA from tricistronic rRNA transcript (SSU-rRNA, 5.8S rRNA, LSU-rRNA) and cytosolic small ribosomal subunit, hyphal cell wall, yeast-form cell wall localization		-0.870788	-0.702614	-1.10325
AN4599		Ortholog(s) have polynucleotide 5'-hydroxyl-kinase activity		0.377938	-0.586327	-1.48107
AN4616	ssz1	Putative 70 kilodalton heat shock protein; protein induced by farnesol		-0.679833	-0.0797784	-1.36778
AN4648		Has domain(s) with predicted role in rRNA processing and nucleolus localization		-0.146691	-0.0739727	-0.6769
AN4771		Putative WD40 repeat protein; expression reduced after exposure to farnesol		0.0692385	0.177671	-0.340952
AN4777		Ortholog(s) have structural constituent of ribosome activity		-0.548301	-0.560838	-0.582702
AN4803		Ortholog(s) have rRNA binding, structural constituent of ribosome activity and role in maturation of SSU-rRNA from tricistronic rRNA transcript (SSU-rRNA, 5.8S rRNA, LSU-rRNA), positive regulation of translational fidelity		-0.928168	-0.953851	-1.51242
AN4872	ubi1	Fusion protein consisting of N-terminal ubiquitin and C-terminal extension protein (CEP) of the small ribosomal subunit; transcript upregulated in response to camptothecin		-0.912997	-0.6535	-1.30151
AN4916		Ortholog(s) have role in ribosome biogenesis and cell surface, small-subunit processome localization		-0.949143	-0.926906	-1.45605
AN5013		Ortholog(s) have 3'-5'-exoribonuclease activity		0.319904	0.564398	0.499526
AN5177		Ortholog(s) have role in ribosomal large subunit biogenesis		-0.949606	-0.792968	-1.29786
AN5222		Ortholog(s) have structural constituent of ribosome activity and role in maturation of SSU-rRNA from tricistronic rRNA transcript (SSU-rRNA, 5.8S rRNA, LSU-rRNA), ribosomal small subunit assembly		-0.883007	-0.921567	-1.07487
AN5340		Ortholog(s) have role in endonucleolytic cleavage in 5'-ETS of tricistronic rRNA transcript (SSU-rRNA, 5.8S rRNA and LSU-rRNA), more		0.0245621	0.107212	-0.603165
AN5441		Ortholog(s) have role in endonucleolytic cleavage in ITS1 to separate SSU-rRNA from 5.8S rRNA and LSU-rRNA from tricistronic rRNA transcript (SSU-rRNA, 5.8S rRNA, LSU-rRNA), rRNA export from nucleus		-0.944435	-0.844228	-1.11422
AN5443		Ortholog(s) have guanyl-nucleotide exchange factor activity and role in mature ribosome assembly		-0.28374	-0.0032492	-0.123619
AN5455		Ortholog(s) have U3 snoRNA binding activity		-0.478219	-0.196692	-1.13006
AN5520		Ortholog(s) have role in maturation of LSU-rRNA and cytosolic large ribosomal subunit localization		-0.932944	-0.998688	-1.68506
AN5702		Ortholog(s) have role in ribosomal large subunit biogenesis, ribosomal small subunit biogenesis and nucleolus localization		0.482763	0.344432	-0.157058
AN5711		Ortholog(s) have transferase activity, role in maturation of SSU-rRNA and cytoplasm localization		-0.100729	0.362505	0.095079
AN5715		Putative 40s ribosomal protein S26; ortholog of S. cerevisiae Rps26Bp which has role in rRNA export from nucleus; expression reduced after exposure to farnesol		-0.973597	-0.876637	-1.20804
AN5785		Ortholog(s) have unfolded protein binding activity		0.295059	0.515511	0.280245
AN5789		Ortholog(s) have rRNA (guanine) methyltransferase activity		0.223891	0.572721	0.32254
AN5865		Putative GTP-binding protein; S. cerevisiae ortholog Nog1p has role in ribosomal subunit export from nucleus, ribosomal large subunit biogenesis and rRNA processing; expression reduced after exposure to farnesol		-0.197126	0.1711	-0.892526
AN5871		Ortholog(s) have rRNA (adenine) methyltransferase activity, rRNA (adenine-N1-)-methyltransferase activity, role in rRNA methylation, rRNA processing, ribosomal large subunit biogenesis and 90S preribosome, nucleolus localization		-0.0048218	0.164452	-0.24772
AN5875		Ortholog(s) have role in endonucleolytic cleavage in ITS1 to separate SSU-rRNA from 5.8S rRNA and LSU-rRNA from tricistronic rRNA transcript (SSU-rRNA, 5.8S rRNA, LSU-rRNA), rRNA processing, ribosomal small subunit biogenesis		-0.208277	-0.0157186	0.161893
AN5910		Ortholog(s) have RNA polymerase II C-terminal domain phosphoserine binding, RNA polymerase II complex binding, chromatin binding activity		-0.382522	-0.681248	-0.906366
AN5960		Ortholog(s) have mRNA binding activity and role in maturation of SSU-rRNA from tricistronic rRNA transcript (SSU-rRNA, 5.8S rRNA, LSU-rRNA), ribosomal small subunit assembly		-0.970718	-0.839998	-1.55356
AN5979		Ortholog(s) have role in ribosomal small subunit assembly		-0.804421	-0.786004	-1.13782
AN5997		Ortholog(s) have role in rRNA export from nucleus		-0.774572	-0.794702	-0.942862
AN6067		Ortholog(s) have GDP-dissociation inhibitor activity, translation initiation factor activity, translation initiation factor binding activity		0.450983	0.47034	0.29648
AN6082		Ortholog(s) have RNA binding, pre-mRNA 5'-splice site binding, structural constituent of ribosome activity and role in negative regulation of mRNA splicing, via spliceosome, rRNA processing		-0.731556	-0.531117	-0.817662
AN6083		Ortholog(s) have role in ribosomal large subunit assembly, translational termination and cell surface, cytosolic large ribosomal subunit localization		-0.545833	-0.616642	-1.00513
AN6112	dnfB	Flippase, type 4 P-type ATPase involved in distribution of phosphatidylserine		0.263237	0.171044	0.314817
AN6149		Ortholog(s) have RNA helicase activity, mitochondrial ribosomal large subunit rRNA binding activity and role in RNA metabolic process, mitochondrial large ribosomal subunit assembly, response to cold		-0.0829555	-0.0897617	-0.739343
AN6171		Ortholog(s) have snoRNA binding activity, role in rRNA processing, ribosomal small subunit biogenesis and Mpp10 complex, small-subunit processome localization		-0.122357	0.318799	-0.423377
AN6202	rpl3	Putative ribosomal protein L3		-0.989683	-0.98723	-1.47192
AN6244		Ortholog(s) have role in exonucleolytic trimming to generate mature 3'-end of 5.8S rRNA from tricistronic rRNA transcript (SSU-rRNA, 5.8S rRNA, LSU-rRNA), nuclear polyadenylation-dependent tRNA catabolic process, rRNA catabolic process		-0.301597	-0.295565	-0.697188
AN6265		Ortholog(s) have role in endonucleolytic cleavage in 5'-ETS of tricistronic rRNA transcript (SSU-rRNA, 5.8S rRNA and LSU-rRNA), more		0.142554	0.747559	1.08833
AN6266		Has domain(s) with predicted role in ribosome biogenesis and nucleus localization		-0.0161328	0.250075	-0.467708
AN6310		Ortholog(s) have ATPase activity and role in protein-RNA complex remodeling, rRNA processing, regulation of ribosomal subunit export from nucleus, ribosomal large subunit assembly		-0.350744	-0.0298883	-0.827885
AN6334		Has domain(s) with predicted GTP binding, GTPase activity, role in SRP-dependent cotranslational protein targeting to membrane, ribosome biogenesis and nucleus localization		0.030783	0.257169	0.00933737
AN6374		Ortholog(s) have DNA helicase activity, DNA/RNA helicase activity, RNA helicase activity, role in maturation of LSU-rRNA from tricistronic rRNA transcript (SSU-rRNA, 5.8S rRNA, LSU-rRNA) and nucleolus localization		0.044024	0.378895	-0.19991
AN6514		Ortholog(s) have GDP binding, RNA pyrophosphohydrolase activity, enzyme regulator activity, phosphodiesterase decapping endonuclease activity		0.431306	0.50301	0.681119
AN6556		Ortholog(s) have mRNA binding activity		-0.362238	-0.0333611	-1.19099
AN6561		Ortholog(s) have role in cleavage involved in rRNA processing, maturation of SSU-rRNA from tricistronic rRNA transcript (SSU-rRNA, 5.8S rRNA, LSU-rRNA), ribosomal small subunit biogenesis and 90S preribosome, nucleolus localization		-0.168043	0.370821	0.186645
AN6563		Putative translation elongation factor EF-1 gamma; ortholog of S. cerevisiae Cam1p; expression reduced after exposure to farnesol		-0.453756	-0.462504	-0.810459
AN6585		Ortholog(s) have RNA helicase activity, role in maturation of SSU-rRNA from tricistronic rRNA transcript (SSU-rRNA, 5.8S rRNA, LSU-rRNA), ribosome biogenesis and nucleolus, small-subunit processome localization		0.0225045	0.552323	-0.269351
AN6612		Ortholog(s) have role in maturation of 5.8S rRNA from tricistronic rRNA transcript (SSU-rRNA, 5.8S rRNA, LSU-rRNA), maturation of LSU-rRNA from tricistronic rRNA transcript (SSU-rRNA, 5.8S rRNA and LSU-rRNA), more		-0.250741	-0.163348	-0.845096
AN6632		Putative 40S ribosomal protein S28; ortholog of S. cerevisiae Rps28Bp; expression reduced after exposure to farnesol		-0.754552	-0.694603	-0.936899
AN6651		Ortholog(s) have ATP binding, ATPase activity, ribosome binding, translation termination factor activity and role in poly(A)+ mRNA export from nucleus, regulation of translational termination, ribosomal small subunit biogenesis		0.1989	0.22032	-0.545934
AN6679		Ortholog(s) have small ribosomal subunit rRNA binding, structural constituent of ribosome activity and role in maturation of SSU-rRNA from tricistronic rRNA transcript (SSU-rRNA, 5.8S rRNA, LSU-rRNA)		-0.693295	-0.63709	-0.694678
AN6902		Protein with a predicted role in mRNA turnover; ortholog of S. cerevisiae Mrt4p; expression reduced after exposure to farnesol		0.136511	0.580459	-0.417144
AN6978	rcc1	Putative nucleotide exchange factor involved in nucleocytoplasmic trafficking of macromolecules		-1.17447	-1.50305	-1.59347		1
AN6980	nic96	Component of the nuclear pore complex		0.251504	0.301673	0.0966616
AN7205		Ortholog(s) have unfolded protein binding activity, role in ribosome biogenesis and nucleolus localization		-0.143557	0.157577	-0.533961
AN7260		Ortholog(s) have chromatin binding activity and role in DNA replication initiation, pre-replicative complex assembly involved in nuclear cell cycle DNA replication, rRNA processing, response to drug, ribosomal large subunit biogenesis		0.0359135	0.290351	-0.110948
AN7305		Ortholog(s) have ATPase activator activity, RNA binding activity		-0.429304	0.010696	-0.664139
AN7424		Putative ATP-dependent RNA helicase; ortholog of S. cerevisiae Dbp3p; expression reduced after exposure to farnesol		-0.586649	-0.317758	-0.876793
AN7526		Ortholog(s) have role in maturation of SSU-rRNA from tricistronic rRNA transcript (SSU-rRNA, 5.8S rRNA, LSU-rRNA), rRNA processing and nucleolus, small-subunit processome localization		0.146552	0.205852	-0.408045
AN7630		Ortholog(s) have unfolded protein binding activity, role in ribosomal large subunit assembly, ribosomal large subunit biogenesis and cytosol localization		0.201259	0.0792979	-0.437834
AN7674		Ortholog(s) have role in ribosomal large subunit biogenesis and nucleolus, nucleus, preribosome, large subunit precursor localization		0.243488	0.671938	-0.112417
AN8073		Has domain(s) with predicted RNA binding, S-adenosylmethionine-dependent methyltransferase activity, methyltransferase activity and role in rRNA processing		-0.343605	-0.254717	-1.14662
AN8247		Ortholog(s) have role in maturation of 5.8S rRNA from tricistronic rRNA transcript (SSU-rRNA, 5.8S rRNA, LSU-rRNA), maturation of LSU-rRNA from tricistronic rRNA transcript (SSU-rRNA, 5.8S rRNA, LSU-rRNA)		-0.17199	0.0538134	-0.671327
AN8254	nop10	Putative snoRNP complex protein; ortholog of S. cerevisiae Nop10p; expression reduced after exposure to farnesol		-0.193804	0.133368	-0.810235
AN8293		Has domain(s) with predicted role in rRNA processing and small-subunit processome localization		-0.133997	0.347429	0.449135
AN8491		Ortholog(s) have role in assembly of large subunit precursor of preribosome, maturation of LSU-rRNA from tricistronic rRNA transcript (SSU-rRNA, 5.8S rRNA, LSU-rRNA), ribosomal large subunit biogenesis		-0.130544	0.146231	-0.55778
AN8668		Ortholog(s) have chromatin binding activity		-0.412368	0.32117	-0.0750973
AN8671		Ortholog(s) have 5'-3' DNA helicase activity, 5'-3' DNA/RNA helicase activity, protein domain specific binding activity		0.106441	0.0908786	-0.247197
AN8691		Ortholog(s) have RNA binding, ribonuclease MRP activity, ribonuclease P activity, tRNA binding activity		-0.0498646	-0.00175199	0.241969
AN8805		Ortholog(s) have unfolded protein binding activity		-0.186967	0.111293	-0.21932
AN8824		Ortholog(s) have ribosomal large subunit binding activity		-1.41279	-3.05106	-3.36099		1
AN8834		Ortholog(s) have rRNA primary transcript binding activity		0.0824669	0.196596	-0.513868
AN8849		Ortholog(s) have S-adenosylmethionine-dependent methyltransferase activity, rRNA (uridine-N3-)-methyltransferase activity, role in rRNA base methylation and nucleolus localization		0.328169	0.59079	0.83994
AN8851	swoC	Predicted pseudouridylate synthase, involved in establishment of cell polarity; mutants show defects in anisotropic growth, endocytosis, nuclear distribution and compartmentation; transcript upregulated in response to camptothecin		-0.504727	-0.332523	-1.26665
AN8856		Ortholog(s) have RNA binding activity, role in ribosomal large subunit assembly and cytosolic large ribosomal subunit, preribosome, large subunit precursor localization		-0.791699	-0.688896	-0.90786
AN8860		Ortholog(s) have ATP binding, ATPase activity, adenylate kinase activity		0.428214	0.715773	0.328816
AN8870		Expression increased in salt-adapted strains		-0.855974	-0.784278	-0.996095
AN9060		Ortholog(s) have ATPase activator activity, role in endocytosis, rRNA processing, ribosomal large subunit biogenesis, ribosomal large subunit export from nucleus and cytoplasm, cytosol, nucleolus localization		0.198381	0.15552	0.584375
AN9097		Ortholog(s) have role in maturation of SSU-rRNA from tricistronic rRNA transcript (SSU-rRNA, 5.8S rRNA, LSU-rRNA)		-0.843653	-0.663882	-0.9003
AN9398		Ortholog(s) have snoRNA binding activity		0.493537	0.689874	0.112661
AN9468		Ortholog(s) have role in maturation of SSU-rRNA from tricistronic rRNA transcript (SSU-rRNA, 5.8S rRNA, LSU-rRNA)		-0.891089	-0.819151	-1.13278
			Number of upregulated genes in the group:	0	0	3		4	0	0	0
			Number of downregulated genes in the group:	6	5	48		0	0	0	0
			Number of genes in the group:	176	176	176		176	176	176	176
			Total number of upregulated genes:	1749	2159	2371		918	286	322	433
			Total number of downregulated genes:	1270	1705	1960		1193	69	148	203
			Total number of genes:	10867	10867	10867		10867	10867	10867	10867
			p value for the upregulated genes:	1	1	1		0.9999	1	1	1
			p value for the downregulated genes:	1	1	0.001484		1	1	1	1
Mitotic cell cycle genes
GENEID	Gene namea	Featurea	Descriptionb	log2FC values				Regulation (up=1, down=-1)
				Lactose containing cultures	Arabinogalactan containing cultures	Carbon starved cultures		Culture specific gene
				vs.	vs.	vs.		Glucose	Lactose	Arabinogalactan	No carbon source
				Glucose containing cultures	Glucose containing cultures	Glucose containing cultures
AN0084		Ortholog(s) have GTPase activator activity, Ran GTPase binding activity		-0.316243	-0.0863476	-0.117695
AN0091		Ortholog(s) have histone methyltransferase activity (H3-K79 specific), nucleosomal histone binding activity		-0.162679	-0.131835	-0.133928
AN0118	nudA	Cytoplasmic dynein heavy chain, component of the microtubule motor protein involved in nuclear migration; locus contains the conserved upstream open reading frame (uORF) AN0118-uORF		-0.472929	-0.305877	-0.277464
AN0135		Ortholog(s) have role in cellular protein localization, mitotic actomyosin contractile ring assembly and actomyosin contractile ring, polysome localization		1.54781	1.20808	0.836801
AN0140		Protein with a predicted role in actin assembly; similar to Saccharomyces cerevisiae Arp3p		-0.549653	-0.567292	-0.591116
AN0143		Has domain(s) with predicted role in attachment of spindle microtubules to kinetochore and DASH complex, mitotic spindle localization		-0.118195	0.0949817	-0.0936837
AN0166		Ortholog(s) have microtubule binding activity and role in attachment of mitotic spindle microtubules to kinetochore		-0.0827819	0.186218	0.238209
AN0226		Ortholog(s) have ubiquitin protein ligase activity, ubiquitin-protein transferase activity		0.10264	-0.252291	0.21695
AN0228		Ortholog(s) have 3'-5' DNA helicase activity, 3'-5' DNA/RNA helicase activity, ATPase activity, DNA helicase activity, DNA replication origin binding and four-way junction helicase activity, more		0.379867	0.23911	-0.263842
AN0253	top1	Putative DNA topoisomerase I; transcript upregulated in response to camptothecin		-0.0259663	-0.0461115	-0.28179
AN0270		Ortholog(s) have role in pyridoxal phosphate biosynthetic process		0.369535	0.121896	-0.60484
AN0281	bubA	Putative component of the Septation Initiation Network (SIN)		0.429907	0.386528	0.336619
AN0290		Ortholog(s) have actin filament binding activity		-0.792922	-0.452291	-0.748211
AN0295		Ortholog(s) have role in DNA replication termination, ER-associated misfolded protein catabolic process and cytoplasm protein quality control by the ubiquitin-proteasome system, more		0.216559	-0.134924	0.241453
AN0347	rabE	Putative GTPase with a predicted role in intra-Golgi transport; transcript levels increase during the unfolded-protein response (UPR)		0.218645	0.453012	0.595087
AN0410	bimG	Essential protein phosphatase required for the completion of anaphase; uORF encoded in the upstream leader sequence		0.404693	0.277224	0.195053
AN0420	nudG	Cytoplasmic dynein light chain, LC8, component of the microtubule motor protein involved in nuclear migration		-0.0945435	-0.0428681	0.0499603
AN0504	sitA	Protein phosphatase; reduced growth on AVICEL medium and reduced eglA and eglB expression		0.109707	0.225074	0.500604
AN0556	mreA	Putative DNA repair protein; plays a role in the mitotic checkpoint in response to DNA damaging agents; transcript induced in response to DNA damaging agents; required for normal meiosis and ascospore viability		-0.0437825	0.0150644	-0.048068
AN0676	mipA	Gamma-tubulin, essential component of the spindle pole body, required for microtubule function		0.00393232	-0.199435	-0.0815549
AN0696	mad1	Putative spindle assembly checkpoint protein that localizes to the nuclear pore complex		-0.157031	-0.182531	-0.189106
AN0733	hhtA	Histone H3; core histone protein		-0.550152	-0.873868	-0.950798
AN0808	swd1	Component of the Set1/COMPASS methytransferase complex; WD40 repeat protein; ortholog of S. cerevisiae Swd1p which has role in histone H3-K4 methylation; expression reduced after exposure to farnesol		0.410503	0.790798	0.639623
AN0814	cdc20	Activator of anaphase-promoting complex involved in mitotic spindle assembly checkpoint and regulation of mitotic metaphase/anaphase transition		-0.504273	-1.23492	-2.18566
AN0872		Ortholog(s) have chromatin binding activity and role in mitotic DNA replication preinitiation complex assembly, signal transduction involved in intra-S DNA damage checkpoint		-0.27909	-0.710981	-1.09174
AN0960		Ortholog(s) have role in mitotic spindle organization, protein localization to kinetochore, spindle localization and kinetochore localization		-0.0863804	-0.232797	-0.973447
AN10008	culD	Predicted ubiquitin protein ligase; role in ubiquitin-dependent protein catabolism and cullin-RING ubiquitin ligase complex localization; NeddH-associated protein		0.45308	0.564057	0.434348
AN10111		Ortholog(s) have peptidyl-prolyl cis-trans isomerase activity, protein phosphatase regulator activity, role in mitotic spindle organization, response to osmotic stress and protein phosphatase type 2A complex localization		0.106586	0.0780051	0.21603
AN10137		WD domain-containing protein; NeddH-associated protein		0.0752766	-0.000405815	-0.4841
AN10225		Ortholog(s) have central plaque of mitotic spindle pole body, mitotic spindle pole body localization		-0.376058	-0.796381	-1.53767
AN10253		Ortholog(s) have role in maintenance of DNA trinucleotide repeats, mitotic sister chromatid cohesion and Ctf18 RFC-like complex localization		-0.193801	-0.0735723	-0.150378
AN1026		Has domain(s) with predicted role in attachment of spindle microtubules to kinetochore and DASH complex, mitotic spindle localization		-1.2355	-1.76443	-1.79721		1
AN10336		Ortholog(s) have acetyltransferase activity		0.441599	0.518641	1.14613
AN10516	grrA	Putative F-box protein with a role in meiosis; NeddH-associated protein; required for ascospore development; transcript is highly expressed during sexual development		0.386773	0.455946	1.10963
AN10635	sepB	Essential protein involved in septation and chromosome segregation; contains WD40 repeats		0.0708202	-0.254195	-0.629279
AN10755		Ortholog(s) have DNA replication origin binding, DNA-directed DNA polymerase activity, chromatin binding, single-stranded DNA binding activity		-0.0759405	-0.298766	-0.868701
AN10956	esa1	Putative MYST-type acetyltransferases; ortholog of S. cerevisiae Esa1p		0.306196	0.720267	0.981117
AN11055		Ortholog(s) have protein phosphatase regulator activity, ubiquitin binding activity		-0.0119702	-0.183263	0.307654
AN11059		Putative chitinase; glycoside hydrolase family 18 (GH18) protein with a predicted role in chitin hydrolysis		1.66412	1.29308	2.01995		-1
AN11071		Ortholog(s) have role in cellular response to drug, filamentous growth of a population of unicellular organisms and cytoplasm, nucleus localization		-0.0314898	-0.330662	-0.36993
AN11101	gin4	Protein kinase; mutants display early sexual development		-0.106718	1.88124	1.13263
AN11344		Ortholog(s) have microtubule binding, microtubule plus-end binding activity		0.34826	0.924129	0.805558
AN1170	clrD	Putative H3K9 methyltransferase		0.18283	0.850529	0.746323
AN1171	kin1	Protein kinase; mutants have a moderate growth defect		0.0940225	-0.147883	0.15475
AN11721		Ortholog(s) have 5' overhang single-stranded DNA endodeoxyribonuclease activity, 5'-flap endonuclease activity, DNA helicase activity, chromatin binding and nuclease activity, more		-0.0392493	-0.187666	-0.328213
AN1182	benA	Beta-tubulin, highly conserved component of microtubules; A. nidulans has two beta-tubulin genes, benA and tubC; temperature sensitive mutants are blocked in mitosis and in nuclear division		-0.895753	-0.941054	-1.57504
AN1191	sumO	Small ubiquitin-like modifier (SUMO) protein; mutant is viable, slow growing with pleiotropic phenotypes; punctate nucleoplasmic localization at interphase; deletion causes dramatic increase in asperthecin; camptothecin induced transcript		-0.220666	-0.161392	-0.20291
AN1207		Ortholog(s) have DNA replication origin binding activity, role in mitotic DNA replication, mitotic DNA replication checkpoint and nuclear chromatin, nuclear origin of replication recognition complex localization		-0.432489	-0.5086	-0.801388
AN12161		Ortholog(s) have protein kinase activator activity and role in intra-S DNA damage checkpoint, mitotic DNA replication checkpoint, negative regulation of double-strand break repair via homologous recombination, telomere maintenance		0.18017	0.259975	0.333039
AN1255		Ortholog(s) have nucleosome-dependent ATPase activity		-0.17832	-0.356977	-0.403574
AN1286		Putative histone transcription regulator; transcription upregulated in response to camptothecin		-0.320677	-0.0869608	-0.362113
AN1324	budA	Putative actin-monomer binding protein		0.142928	0.293217	0.315023
AN1335		Ortholog(s) have TORC1 complex, TORC2 complex localization		-0.14272	-0.0449943	0.398537
AN1394	aspD	Putative septin		-0.507013	-0.735	-0.625352
AN1398		Ortholog(s) have DASH complex, condensed nuclear chromosome kinetochore, mitotic spindle midzone, mitotic spindle pole body localization		0.22681	0.0602814	-0.16321
AN1546		Histone deacetylase complex, SIN3 component; this locus is reported to contain an upstream open reading frame (uORF)		-0.0780341	-0.0275451	-0.06828
AN1560	plkA	Polo-like kinase, involved in initiation of mitosis and mitotic progression; transcript upregulated in response to camptothecin; reported as essential in one study, viable with strong growth defect in another study; mutant sensitive to NaCl		-0.534107	-1.02839	-2.04901					-1
AN1779	nimO	Essential protein kinase required for DNA synthesis and mitotic checkpoint control; this locus is reported to contain an upstream open reading frame (uORF)		-0.310111	-0.474197	-0.728164
AN1875		Ortholog(s) have role in budding cell bud growth, mitotic cell cycle, nucleocytoplasmic transport, ribosomal large subunit biogenesis and cytoplasm, preribosome, large subunit precursor localization		0.301224	0.662292	0.660382
AN1905	hepA	Putative HP1 chromatin modifier protein; N-terminal chromo-domain followed by a C-terminal chromo-shadow domain; S. cerevisiae does not contain a HP1 protein		-0.412259	-0.408076	-0.983257
AN1929		Ortholog(s) have DNA translocase activity		-0.188055	-0.155434	-0.0907901
AN2047	CaM	Calmodulin; EF-hands containing calcium binding protein; required for normal progression through the cell-cycle; localizes to hyphal tips and transiently to sites of septation; transcript upregulated in response to camptothecin		-0.0753376	-0.226691	-0.169191
AN2126		Predicted actin capping protein		-0.438647	-0.521271	-0.50228
AN2128		Ortholog(s) have role in dynein-driven meiotic oscillatory nuclear movement and microtubule bundle formation involved in horsetail-astral microtubule organization, more		-0.385391	-1.07583	-2.21334					-1
AN2143		Ortholog(s) have double-stranded DNA binding, topological DNA entrapment activity and role in mitotic cohesin loading, mitotic cohesin unloading, mitotic sister chromatid cohesion		-0.12145	0.44023	0.221012
AN2246	gcn2	Ortholog(s) have eukaryotic translation initiation factor 2alpha kinase activity, protein kinase activity, tRNA binding activity		-0.216672	0.000250385	0.00233834
AN2302	sconC	Skp1-related protein with a predicted role in sulfur metabolism; regulated by sulfur metabolite repression; NeddH-associated protein		-0.195051	0.211581	1.14912
AN2412	cmkA	Calcium/calmodulin-dependent protein kinase A; essential for growth and nuclear division; expression downregulated by farnesol; transcript upregulated by camptothecin; mutants have a moderate growth defect and increased pigment production		0.444615	0.189533	0.493749
AN2417		Ortholog(s) have role in chromatin remodeling, positive regulation of protein phosphorylation, signal transduction involved in mitotic DNA replication checkpoint and ASTRA complex, TORC1 complex, TORC2 complex localization		-0.346625	-0.205447	-0.280333
AN2438		Ortholog(s) have role in establishment of mitotic sister chromatid cohesion, protein import into nucleus		-0.589178	-0.451912	-0.0768885
AN2439	sldB	Spindle assembly checkpoint protein		-0.426585	-0.480662	-0.371656
AN2484		Ortholog(s) have actin monomer binding, guanyl-nucleotide exchange factor activity		-0.32772	-0.435146	-0.6206
AN2511	mad2	Putative spindle assembly checkpoint protein that localizes to the nuclear pore complex		-0.0718288	-0.0963601	-0.0967741
AN2686		Has domain(s) with predicted role in mitotic spindle organization and DASH complex, mitotic spindle localization		0.6077	1.24006	1.11356
AN2761		Putative ubiquitin-conjugating enzyme E2; transcript upregulated in response to camptothecin		-0.0124994	0.0854624	0.152573
AN2764		Putative DNA repair protein; transcript upregulated in response to camptothecin		-0.301828	-0.0627586	0.0279412
AN2768		Has domain(s) with predicted role in attachment of spindle microtubules to kinetochore and DASH complex, spindle microtubule localization		-0.731422	-0.690597	-0.635772
AN2772	bimE	Component of the Anaphase-Promoting Complex/Cyclosome (APC/C), which is a ubiquitin ligase required for cell cycle progression; negative regulator of mitosis		-0.228927	-0.173593	-0.235514
AN2848		Ortholog(s) have role in mRNA splicing, via spliceosome, regulation of DNA methylation and U4/U6 x U5 tri-snRNP complex, U5 snRNP localization		0.240541	0.108331	-0.0795357
AN2854		Ortholog(s) have DNA replication origin binding, DNA-binding transcription activator activity, RNA polymerase II-specific, DNA-binding transcription repressor activity and RNA polymerase II-specific, more		-0.0194656	-0.0205204	0.148223
AN2862		Predicted CAP-Gly domain protein with similarity to Saccharomyces cerevisiae Bim1p		-0.281313	-0.412726	-0.702213
AN2963		Ortholog(s) have cohesin ATPase activity, double-stranded DNA binding, topological DNA entrapment activity and role in mitotic cohesin loading, mitotic cohesin ssDNA (lagging strand) loading, mitotic sister chromatid cohesion		-0.238287	-0.319981	-0.539879
AN2969		Ortholog(s) have DNA clamp loader activity, chromatin binding activity		0.221082	0.328104	0.170575
AN3062	pcpA	Putative pericentrin-related protein involved in microtubule organization and hyphal polarity		-0.247878	-0.4338	-0.897413
AN3067		Ortholog(s) have DNA-directed DNA polymerase activity, double-stranded DNA binding, single-stranded DNA 3'-5' exodeoxyribonuclease activity, single-stranded DNA binding activity		0.150349	0.0157453	-0.617288
AN3118		Ortholog(s) have crossover junction endodeoxyribonuclease activity		-0.448127	-0.279184	-0.957947
AN3124		Kinesin-family protein		-0.748232	-1.62688	-2.37458
AN3154	rgdA	Ortholog(s) have DNA-binding transcription activator activity, RNA polymerase II-specific, RNA polymerase II cis-regulatory region sequence-specific DNA binding activity		-0.172459	-0.0112622	-0.264812
AN3156		Ortholog(s) have role in formation of translation preinitiation complex, mitotic G1 DNA damage checkpoint		-0.545842	-0.326876	-0.408256
AN3363	bimC	Kinesin-family protein required for the normal completion of mitosis; required for separation of mitotic spindle pole bodies		-0.645582	-1.07985	-2.14057					-1
AN3372	scaA	Putative DNA repair protein with homology to human nibrin; involved in S-phase recovery and G2-M checkpoint; transcript induced in response to DNA damaging agents; also known as campothecin resistance conferring protein rcaA		-0.829834	-0.637591	-0.413171
AN3373		Ortholog(s) have role in cellular response to DNA damage stimulus, error-free translesion synthesis, translesion synthesis and nuclear chromatin localization		0.493421	0.485631	0.453477
AN3437	apsB	Coiled-coil protein of the spindle pole body involved in distribution of nuclei in hyphae and conidiophores; required for entry of nuclei into sterigmata; mutants show uneven distribution and chaotic movement of nuclei; mutants self-sterile		-0.648825	-0.575067	-0.669209
AN3450	cdc7	Protein serine/threonine kinase; mutants are inviable, arresting as swollen hyphae with a cell cycle arrest		0.448611	0.606668	0.650096
AN3451		Ortholog(s) have ATPase activity, double-stranded DNA binding, single-stranded DNA binding activity and role in mitotic chromosome condensation		-0.359266	-0.744503	-1.25996
AN3579		Ortholog(s) have role in mitotic spindle elongation, vesicle-mediated transport and integral component of Golgi membrane localization		0.391324	0.423083	0.455167
AN3619	sldI	Protein with similarity to Rad50; transcript induced in response to DNA damaging agents		0.387268	0.642566	0.649223
AN3620		Ortholog(s) have role in intra-S DNA damage checkpoint, meiotic G2/MI DNA replication checkpoint, mitotic DNA replication checkpoint, mitotic G2 DNA damage checkpoint, telomere maintenance		-0.335932	-0.292614	-0.34406
AN3622	rgsB	Member of the RGS (regulator of G-protein signaling) family; expressed at constant level during the life cycle		-0.221376	-0.560799	-0.473842
AN3648	nimE	B-type cyclin, mitosis-specific cyclin required for G2-M transition; regulates activity of cyclin-dependent protein kinase NimX		-0.311673	-0.531059	-1.59061					-1
AN3666		Ortholog(s) have role in DNA strand elongation involved in mitotic DNA replication, DNA-dependent DNA replication, double-strand break repair via break-induced replication, mitotic DNA replication initiation		-0.0175621	-0.0086088	0.447069
AN3710		Ortholog(s) have role in attachment of mitotic spindle microtubules to kinetochore, microtubule sliding involved in mitotic metaphase chromosome recapture, mitotic metaphase chromosome recapture, mitotic sister chromatid biorientation		0.112136	0.333267	0.797275
AN3729	fksA	Putative 1,3-beta-glucan synthase with a predicted role in glucan biosynthesis		-0.435811	-1.1072	-0.935127
AN3735		Predicted Ras GTPase activating protein (Ras GAP)		-0.22919	0.159945	-0.27183
AN3910		Ortholog(s) have role in establishment of mitotic sister chromatid cohesion, maintenance of rDNA, meiotic attachment of telomere to nuclear envelope, mitotic sister chromatid segregation, nuclear envelope organization		-0.151649	-0.414182	-0.180631
AN3941	nimT	Protein tyrosine phosphatase involved in cell cycle control; required for progression through G2; homolog of S. pombe cdc25		-0.165114	-0.131862	0.18355
AN3946	sldA	Spindle assembly checkpoint protein kinase; mutants have a moderate growth defect, are sensitive to benomyl, NaCl and display abnormal colony color		-0.444021	-0.952934	-2.36149					-1
AN4182	nimX	Cyclin-dependent protein kinase involved in cell cycle control; required for cell cycle progression through G1 and G2; regulated by NimE cyclin and NimT phosphatase; homolog of S. pombe cdc2; transcript camptothecin upregulated		-0.260505	-0.642394	-1.03502
AN4265		Ortholog(s) have ATPase activity, double-stranded DNA binding, single-stranded DNA binding activity and role in attachment of mitotic spindle microtubules to kinetochore, mitotic chromosome condensation		0.137895	0.151318	-0.206536
AN4270		Ortholog(s) have Arp2/3 complex binding activity		-0.0107382	-0.339762	-0.270214
AN4279	chkB	Putative a2+/calmodulin-dependent protein kinase; role in the response to DNA damage; mutants sensitive to hydroxyurea		0.221884	-0.219111	-0.203048
AN4360		Ortholog(s) have structural molecule activity		0.86839	-0.392176	-0.791759
AN4399	ubcN	SumO conjugation (E2) enzyme		-0.125699	0.0998639	-0.0356728
AN4411		Ortholog(s) have sterol binding activity and role in CENP-A containing chromatin organization, cellular response to DNA damage stimulus, proteasome localization to nuclear periphery		0.376717	0.490707	0.491383
AN4417	ndc1	Putative transmembrane-containing nuclear pore complex protein with homology to Saccharomyces cerevisiae Ndc1p; synthetically lethal with null mutations in nup84, nup120 or nup133		-0.494236	-0.391282	-1.00447
AN4493	rpdA	Histone deacetylase; expression of rpdA is induced by trichostatin A		-0.291276	-0.279856	-0.381211
AN4501	artA	Putative 14-3-3 protein; induced by carbon starvation-induced autophagy		-0.207954	-0.457555	-0.431769
AN4513	kipB	Microtubule (MT) depolymerase; Kip3 family kinesin; travels toward MT plus end; roles in mitotic spindle positioning, MT cytoskeletal morphology, mitotic progression, chromosome maintenance; mitotic, astral, cytoplasmic MT localization		-0.533019	-0.921599	-2.08615					-1
AN4555		Ortholog(s) have role in maintenance of rDNA, mitotic DNA replication, postreplication repair and RecQ family helicase-topoisomerase III complex, nucleus, site of double-strand break localization		0.141772	0.61444	0.430287
AN4564	teaA	Cell-end marker protein; related to Schizosaccharomyces pombe Tea1; null mutant exhibits zig-zag hyphae and microtubule cytoskeletal abnormalities at hyphal apex; interacts with TeaR; wild-type localization requires TeaA, KipA, microtubules		-0.748963	-1.05221	-0.972928
AN4571		Ortholog(s) have 3'-flap-structured DNA binding, D-loop DNA binding, Y-form DNA binding, bubble DNA binding, double-stranded DNA binding, protein binding, bridging activity		-0.0976744	-0.344783	-1.1769
AN4597		Putative condensin subunit, ortholog S. cerevisiae Smc4p		0.0288621	-0.264185	-0.84753
AN4612		Ortholog(s) have DASH complex localization		-0.00451603	-0.0610116	0.00305025
AN4667	aspA	Septin, involved in development; prevents formation of inappropriate germ tubes and branches; required for formation of normal conidiophores; protein induced by farnesol		-0.549305	-0.771841	-0.699807
AN4678		Ortholog(s) have peptidyl-lysine acetyltransferase activity		0.352322	0.432474	0.429778
AN4685		Predicted Ras GTPase		0.181162	-0.112415	-0.281508
AN4706	myoB	Myosin II; required for normal conidiation, septum formation and for correct chitin deposition		-0.399212	-0.832062	-1.50961
AN4790	rrpB	Putative RNA-directed RNA polymerase		0.272115	0.929132	0.852186
AN4804		Ortholog(s) have role in attachment of mitotic spindle microtubules to kinetochore, mitotic sister chromatid segregation, protein localization to kinetochore involved in kinetochore assembly		0.208512	0.104094	0.288841
AN4862	ranGAP	Putative Ran GTPase activating protein (GAP) with homology to Saccharomyces cerevisiae Rna1p; endogenously tagged RanGAP is excluded from nuclei during interphase and disperses throughout the cell at mitosis		-0.193148	-0.0774704	-0.466483
AN4867	gcpC	Gamma-tubulin complex protein 3		0.0106384	0.0720257	-0.0812505
AN4961		Has domain(s) with predicted role in mitotic cell cycle and DASH complex, mitotic spindle localization		-0.104173	-0.0627092	-0.14634
AN4963		Ortholog(s) have cytoskeletal protein membrane adaptor, phospholipid binding activity		-0.904394	-1.93499	-3.26299					-1
AN4969	ndc80	Putative component of the kinetochore-associated Ndc80 complex		-0.053433	0.235083	0.159309
AN4996		Ortholog(s) have role in mitotic sister chromatid segregation and NMS complex, condensed chromosome, centromeric region, condensed nuclear chromosome kinetochore, nuclear MIS12/MIND complex localization		-0.539583	-0.753452	-0.903071
AN4997		Ortholog(s) have phosphatidylcholine transporter activity, phosphatidylinositol transfer activity		-0.240415	-0.157198	-0.307636
AN5057	cdcA	Putative phosphoprotein phosphatase; reduced growth on AVICEL medium and reduced eglA and eglB expression		-0.417496	-0.837633	-2.15118					-1
AN5195		Ortholog(s) have cargo receptor activity and role in ascospore formation, axial cellular bud site selection, endoplasmic reticulum to Golgi vesicle-mediated transport		-0.516235	-0.665657	-0.322163
AN5406	top2	Predicted type II DNA topoisomerase		0.0705218	-0.4427	-1.21829
AN5483		Ortholog(s) have protein-DNA unloading ATPase activity		0.198961	0.239048	0.421494
AN5494	chkA	Putative serine/threonine kinase; role in the DNA damage response; mutants sensitive to hydroxyurea and DEO		-0.475569	-0.938674	0.235723
AN5517	fbxB	Putative F-box protein		0.034494	-0.156424	-0.0253361
AN5518		Has domain(s) with predicted GTP binding activity and role in division septum assembly		0.178801	0.364705	0.418004
AN5521	alpA	Microtubule stabilizing, plus end-binding protein; Dis1/XMAP215 family, group 3; mutation causes polarity defects, hyphal curving, Spitzenkorper mislocalization, misplaced germ tube emergence, fewer and less dynamic cytoplasmic microtubules		0.166525	0.0594931	-0.153657
AN5574		Ortholog(s) have role in DNA-dependent DNA replication, double-strand break repair via break-induced replication, mitotic DNA replication initiation		-0.101713	-0.063689	0.113132
AN5618	cdc31	Putative spindle pole body protein; predicted to be involved in nuclear transport protein		-0.557091	-0.663764	-1.12812
AN5631		Ortholog(s) have protein phosphatase activator activity		0.231514	-0.177089	0.240749
AN5676		Putative pre-initiation complex, subunit; ortholog of S. cerevisiae Cdc6p; expression reduced after exposure to farnesol		0.154741	0.451446	-0.135374
AN5686	tpmA	Tropomysin, an actin filament-stabilizing protein; localizes to hyphal tips		0.353419	0.568561	0.701807
AN5778		Ortholog(s) have actin filament binding activity		-0.184248	0.147792	0.0706559
AN5789		Ortholog(s) have rRNA (guanine) methyltransferase activity		0.223891	0.572721	0.32254
AN5803	fimA	Predicted fimbrin protein; a highly conserved protein that contains two actin-binding domains (ABD) and a predicted EF hand calcium-binding domain; involved in hyphal polarity and conidiophore development; menadione-induced protein		0.275201	-0.139852	0.0344685
AN5815		Aurora protein serine/threonine kinase		-0.483359	-0.737857	-2.09053					-1
AN5822	ankA	Serine/threonine protein kinase involved in DNA damage checkpoint and G2/M transition; ortholog of S. pombe wee1; inviable; arrests in cell cycle		-0.750885	-0.0733999	-1.63241
AN5873	gcpB	Gamma-tubulin complex protein 2		-0.136037	-0.26122	-0.234818
AN5885	agsA	Catalytic subunit of alpha-1,3 glucan synthase complex; plays a minor role in alpha-1,3 glucan synthesis compared to AgsB; locus contains the conserved upstream open reading frame (uORF) AN5885-uORF		2.60184	4.98567	2.06378		-1		1
AN5899	smcB	Putative condensin		0.162062	0.14322	0.151993
AN5910		Ortholog(s) have RNA polymerase II C-terminal domain phosphoserine binding, RNA polymerase II complex binding, chromatin binding activity		-0.382522	-0.681248	-0.906366
AN6044	npkA	Putative serine/threonine protein kinase of the PITSLRE superfamily involved in cell cycle progression during S phase and in DNA damage response; camptothecin induced		0.297372	-0.00830311	-0.00360962
AN6069		Ortholog(s) have DNA ligase (ATP) activity, DNA ligase activity, role in DNA ligation, DNA repair, Okazaki fragment processing involved in mitotic DNA replication and mitochondrion, nucleus localization		-0.14335	-0.234987	-0.393721
AN6070		Ortholog(s) have 3'-5' DNA helicase activity, 3'-5' DNA/RNA helicase activity, ATPase activity, DNA helicase activity, DNA replication origin binding, chromatin binding and four-way junction helicase activity, more		0.240094	0.114201	-0.207365
AN6114		Ortholog(s) have 5'-deoxyribose-5-phosphate lyase activity, DNA-directed 5'-3' RNA polymerase activity, DNA-directed DNA polymerase activity, single-strand break-containing DNA binding activity		0.763517	0.687481	1.08292
AN6138	bimA	Component of the Anaphase-Promoting Complex/Cyclosome (APC/C), which is a ubiquitin ligase required for cell cycle progression; mutations lead to DNA damage and block cytokinesis; tetratricopeptide repeat (TPR) gene family member		0.107218	0.133714	0.473892
AN6147		Ortholog(s) have histone methyltransferase activity (H4-K20 specific), nucleosome binding activity and role in cellular protein localization, chromatin silencing, histone H4-K20 methylation, mitotic G2 DNA damage checkpoint		0.0655248	-0.480814	0.149466
AN6303	uvsF	Protein with similarity to DNA replication factor C; mutations cause hypersensitivity to UV; transcript upregulated in response to camptothecin		-0.225266	-0.266682	-0.439255
AN6340	klpA	Kinesin-family protein with a role in the establishment of spindle pole bipolarity		-0.332375	-0.773409	-1.65688
AN6359	sconB	Protein involved in sulfur metabolite repression; contains an F-box and seven WD repeats		-0.825068	-1.18362	-1.28688
AN6364	sudA	Protein of the chromosome scaffold, involved with BimD in chromosome segregation; member of the DA-box protein family; transcript upregulated in response to camptothecin		-0.418295	-0.56195	-0.700194
AN6391	pphA	Protein phosphatase		-0.131449	-0.187482	-0.189383
AN6505	rcoA	WD40 repeat protein; required for sexual development and for sterigmatocystin production; experimentally studied orthologs present in Neurospora crassa, Candida albicans, Schizosaccharomyces pombe and Penicillium marneffei		-0.0332388	-0.242653	-0.258911
AN6523	sepA	Formin; FH1/2 domain protein; colocalizes with TeaA at cell apex, localization is actin-dependent; required for the formation of actin rings at sites of septation; mutant spores exhibit a random pattern of germ tube emergence		0.00858165	-0.112686	-0.3644
AN6542	actA	Gamma-actin		-0.823209	-1.15411	-1.19679
AN6553		Ortholog(s) have double-stranded DNA binding activity		0.128094	0.261524	1.11326
AN6574		Ortholog(s) have DNA replication origin binding, ubiquitin protein ligase activity, ubiquitin-protein transferase activity		0.18	0.03202	0.154434
AN6600		Ortholog(s) have role in CENP-A containing chromatin organization, mitotic sister chromatid segregation, protein localization to kinetochore		-0.22466	-0.0950524	-0.364206
AN6611		Ortholog(s) have role in ascospore formation, asymmetric protein localization to old mitotic spindle pole body, intra-S DNA damage checkpoint and negative regulation of septation initiation signaling, more		0.13933	0.148534	-0.0495895
AN6616	nuvG	Protein with homology to PCNA-like DNA damage sensor		0.331484	0.176027	-0.237999
AN6685		Ortholog(s) have role in actin filament bundle organization, bipolar cellular bud site selection, cellular bud site selection, hyphal growth, positive regulation of establishment of bipolar cell polarity regulating cell shape		0.169586	-0.563066	-0.606941
AN6687		Ortholog(s) have role in cellular protein localization, cellular response to biotic stimulus, cellular response to starvation and chromatin silencing at centromere, more		-0.100031	0.0258243	-0.105691
AN6688	aspB	Putative septin B; localizes to septa during early septum formation and to branch points during vegetative growth; localizes to the vesicle/metula, the metula/phialide and the phialide/conidium interfaces during conidiophore development		-0.259005	-0.519912	-0.223408
AN6689		Ortholog(s) have role in endoplasmic reticulum tubular network membrane organization, nuclear envelope organization, nuclear pore distribution, nuclear pore organization, spindle pole body localization to nuclear envelope		-0.158778	0.00319529	-0.0662445
AN6705		Ortholog(s) have DNA binding, DNA translocase activity		-0.335404	-0.42597	-0.741772
AN6732		Predicted myosin light chain		-0.198004	-0.287869	-0.333421
AN6896		Ortholog(s) have molecular adaptor activity and role in mitotic DNA replication checkpoint, mitotic DNA replication preinitiation complex assembly, mitotic G2 DNA damage checkpoint, replication fork processing		0.335558	0.300121	0.138491
AN6975	uvsB	Putative 1-phosphatidylinositol-3-kinase; role in checkpoint regulation during entry into mitosis and the DNA damage response; mutants have moderate growth defect, are sensitive to camptothecin, hydroxyurea and DEO, abnormal colony color		0.435505	0.462208	0.445555
AN7007		Ortholog(s) have DNA binding, Y-form DNA binding, double-stranded DNA binding activity		0.272605	0.704925	0.91395
AN7206	spgA	Ortholog(s) have GTP binding, GTPase activity and role in cellular protein localization, cytokinesis, exit from mitosis, mitotic M phase, positive regulation of mitotic division septum assembly, septation initiation signaling		0.0433665	-0.137622	-0.149813
AN7254		Protein with a conserved CDC48, cell division protein N-terminal domain and two ATPase domains of the AAA-superfamily; protein expressed at increased levels during osmoadaptation; protein induced by farnesol		0.140488	-0.00367482	0.0167219
AN7296	bimD	Essential protein involved in progression through mitosis; mutations confer sensitivity to DNA damage; putative DNA binding protein		-0.519426	-0.526805	-0.656299
AN7309	uvsH	Protein involved in DNA repair; mutants are sensitive to UV and show increased frequency of asexual recombination; transcript upregulated in response to camptothecin		0.132428	0.300199	0.0682853
AN7423		Putative replication protein; transcript upregulated in response to camptothecin		0.0014301	-0.038555	-0.086194
AN7439		Ortholog(s) have DNA polymerase processivity factor activity, DNA-directed DNA polymerase activity, double-stranded DNA binding, single-stranded DNA binding activity		-0.301937	-0.438069	-0.47851
AN7440		Ortholog(s) have role in CENP-A containing nucleosome assembly, chromatin maintenance and nucleoplasm localization		-0.43831	-0.379403	-0.789587
AN7441		Ortholog(s) have 3'-5' DNA helicase activity, chromatin binding, histone acetyltransferase activity, histone binding, nucleosomal histone binding activity		-0.0342039	0.151951	0.0022948
AN7465		Ortholog(s) have double-stranded DNA binding activity		-0.31405	-0.52169	-0.771911
AN7499		Ortholog(s) have double-stranded DNA binding activity		0.281057	0.398608	0.331619
AN7562		Ortholog(s) have alpha-1,6-mannosyltransferase activity and role in ascospore formation, cell wall mannoprotein biosynthetic process, division septum assembly, protein N-linked glycosylation		0.97564	1.38506	1.5188
AN7576		Predicted Rho GTPase activating protein		0.368016	0.527175	0.801057
AN7707		Protein with similarity to alpha-actinin; predicted role in actin filament bundling		0.135843	0.0537997	0.290367
AN8056		Ortholog(s) have ATPase activity, DNA/DNA annealing activity, double-stranded DNA binding, single-stranded DNA binding activity, role in mitotic chromosome condensation and cytoplasm, nuclear condensin complex, nucleus localization		0.0171304	-0.056273	-0.366488
AN8064		Ortholog(s) have ATPase activity, DNA clamp loader activity and role in DNA strand elongation involved in DNA replication, UV-damage excision repair, leading strand elongation		0.207413	0.0583605	-0.0925144
AN8182	aspC	Septin, involved in development; prevents formation of inappropriate germ tubes and branches; required for formation of normal conidiophores		-0.331512	-0.672653	-0.568738
AN8187		Ortholog(s) have sequence-specific DNA binding activity and role in CENP-A containing chromatin organization, kinetochore assembly, mitotic sister chromatid segregation		-0.154162	-0.364346	-0.408653
AN8211		Ortholog(s) have histone demethylase activity (H3-trimethyl-K4 specific) activity		-1.10205	-1.73286	-1.92738		1
AN8261	phoA	Cyclin-dependent protein kinase; role in regulation of development in response to phosphate availability; interacts with cyclin Pho80; lethal in combination with mutations in phoB; mutant is sensitive to NaCl		0.632918	0.515772	0.520841
AN8282		WD40 domain-containing G-beta repeat protein; NeddH-associated protein		-0.913891	-0.451009	-0.108702
AN8751	sidB	Septation initiation network (SIN) component; required for septation and conidiation; interacts with MobA; localizes to spindle pole bodies and sites of septation; S. pombe Mob1p is required for the activity of the sidB ortholog, Sid2p		0.235296	0.187442	0.422294
AN8783	bimB	Protein required for progression through mitosis		-0.666947	-1.04981	-2.15056					-1
AN8820	cnaA	Catalytic subunit of the calmodulin-dependent protein phosphatase (calcineurin A), required for cell cycle progression and for nucleocytoplasmic transport of CrzA in response to stress		0.125781	-0.165714	-0.029466
AN8831	ampB	Ortholog(s) have role in actin filament organization, hyphal growth, mitotic actomyosin contractile ring assembly, small GTPase mediated signal transduction, syncytium formation by plasma membrane fusion		0.618189	1.03679	1.24154
AN8844	rbxA	Putative E3 ubiquitin-protein ligase; NeddH-associated protein		0.0219032	0.247308	0.336529
AN8857		Ortholog(s) have role in mRNA splicing, via spliceosome and U2 snRNP, U2-type spliceosomal complex, post-mRNA release spliceosomal complex, spliceosomal complex localization		0.305567	0.741085	0.86017
AN8862	myoV	Myosin V; involved in the movement of vesicles to the hyphal tip; essential for polarized growth in the absence of microtubules		0.110363	0.124302	-0.157099
AN8876		Ortholog(s) have chromatin binding activity and role in intra-S DNA damage checkpoint, mitotic DNA replication checkpoint, mitotic G2 DNA damage checkpoint, telomere maintenance		0.845894	0.88795	0.899816
AN9435		Has domain(s) with predicted role in mitotic cell cycle and chromosome, centromeric region, nucleus localization		0.123451	0.261621	0.47003
AN9463		Ortholog(s) have actin filament binding, calmodulin binding activity		-0.438467	-0.953385	-2.23694					-1
AN9467	parA	Putative regulatory subunit of protein phosphatase 2A (PP2A)		0.0278977	0.25909	0.0268461
AN9504	nimA	Cell-cycle regulated serine/threonine protein kinase; essential for entry into mitosis; temperature sensitive mutants arrest in G2-phase of the cell cycle; high levels of NimA are lethal		-0.637335	-0.75553	-1.62431
			Number of upregulated genes in the group:	3	7	11		2	0	1	0
			Number of downregulated genes in the group:	2	13	30		2	0	0	11
			Number of genes in the group:	218	218	218		218	218	218	218
			Total number of upregulated genes:	1749	2159	2371		918	286	322	433
			Total number of downregulated genes:	1270	1705	1960		1193	69	148	203
			Total number of genes:	10867	10867	10867		10867	10867	10867	10867
			p value for the upregulated genes:	1	1	1		1	1	0.9987	1
			p value for the downregulated genes:	1	1	0.9633		1	1	1	0.002612
Transcription factor genes
GENEID	Gene namea	Featurea	Descriptionb	log2FC values				Regulation (up=1, down=-1)
				Lactose containing cultures	Arabinogalactan containing cultures	Carbon starved cultures		Culture specific gene
				vs.	vs.	vs.		Glucose	Lactose	Arabinogalactan	No carbon source
				Glucose containing cultures	Glucose containing cultures	Glucose containing cultures
AN0026		Has domain(s) with predicted DNA binding, DNA-binding transcription factor activity, RNA polymerase II-specific, zinc ion binding activity and role in regulation of transcription, DNA-templated, transcription, DNA-templated		3.67551	8.8231	5.47871		-1		1
AN0096		Has domain(s) with predicted DNA binding, DNA-binding transcription factor activity, RNA polymerase II-specific, nucleic acid binding, zinc ion binding activity		1.10811	1.38084	1.38665		-1
AN0148	mdpE	C6 zinc finger transcription factor similar to AflR; member of the monodictyphenone secondary metabolite biosynthesis gene cluster; required for synthesis of monodictyphenone and related compounds but not prenyl xanthones		2.92528	1.54013	3.1785		-1
AN0162		Has domain(s) with predicted DNA binding, DNA-binding transcription factor activity and role in regulation of transcription, DNA-templated		0.244595	0.0807508	0.224521
AN0176	sreA	Predicted GATA transcription factor involved in iron uptake, acts as a repressor of siderophore biosynthesis under high-iron conditions; mutants accumulate increased amounts of iron		-0.447849	-0.606404	-0.385681
AN0197		Has domain(s) with predicted DNA-binding transcription factor activity, RNA polymerase II-specific, zinc ion binding activity, role in regulation of transcription, DNA-templated and nucleus localization		-1.14282	-0.729088	-0.616186
AN0202	arcA	Putative zinc-finger transcription factor of the Zn(II)2Cys6 type involved in regulation of arginine catabolism; acts as a transcriptional activator of arginase (agaA) and ornithine transaminase (otaA) genes		0.290106	0.241247	0.346853
AN0223		Has domain(s) with predicted DNA-binding transcription factor activity, DNA-binding transcription factor activity, RNA polymerase II-specific, zinc ion binding activity and role in regulation of transcription, DNA-templated		9.89822	2.32415	1.84121			1
AN0273	rsrA	Putative transcription factor; involved in oxidative stress response; transcript upregulated in response to camptothecin		-0.580299	-1.67166	-1.86775
AN0279	flbD	Putative transcription factor involved in regulation of asexual and sexual development and in response to nitrogen starvation; contains a myb-like DNA-binding domain		-0.249825	0.144884	-0.747747
AN0312		Ortholog(s) have RNA polymerase I general transcription initiation factor activity and role in transcription initiation from RNA polymerase I promoter		-0.13568	0.270955	-0.171845
AN0364		Has domain(s) with predicted DNA-binding transcription factor activity, RNA polymerase II-specific, zinc ion binding activity, role in regulation of transcription, DNA-templated and nucleus localization		-1.7475	1.50884	-1.17933				1
AN0388	araR	Zn(2)Cys(6) binuclear cluster domain transcription factor involved in regulation of genes of pentose catabolism		0.682465	1.31567	1.17973
AN0407		Ortholog(s) have RNA polymerase III general transcription initiation factor activity, chromatin insulator sequence binding activity and role in transcription initiation from RNA polymerase III promoter		0.604679	0.900024	1.5038
AN0507		Has domain(s) with predicted DNA binding, DNA-binding transcription factor activity, RNA polymerase II-specific, zinc ion binding activity and role in regulation of transcription, DNA-templated, transcription, DNA-templated		1.2395	1.66441	1.27502		-1
AN0533		Putative transcription factor; predicted role in secondary metabolite production		1.15114	1.19881	3.08723		-1			1
AN0585		Has domain(s) with predicted DNA-binding transcription factor activity, RNA polymerase II-specific, zinc ion binding activity, role in regulation of transcription, DNA-templated and nucleus localization		-0.299543	0.720133	-0.308092
AN0619		Has domain(s) with predicted DNA binding, DNA-binding transcription factor activity, RNA polymerase II-specific, zinc ion binding activity and role in regulation of transcription, DNA-templated, transcription, DNA-templated		0.10714	3.97876	-0.223596				1
AN0658		Has domain(s) with predicted DNA binding, DNA-binding transcription factor activity, copper ion binding activity, role in regulation of transcription, DNA-templated and host cell nucleus, nucleus localization		-0.0590545	-0.139222	0.220147
AN0671		Has domain(s) with predicted DNA-binding transcription factor activity, sequence-specific DNA binding activity and role in regulation of transcription, DNA-templated		0.402938	0.195287	0.224746
AN0680		Has domain(s) with predicted DNA-binding transcription factor activity, RNA polymerase II-specific, zinc ion binding activity, role in regulation of transcription, DNA-templated and nucleus localization		0.424013	0.547313	0.646854
AN0718		Has domain(s) with predicted DNA binding, DNA-binding transcription factor activity, RNA polymerase II-specific, zinc ion binding activity and role in regulation of transcription, DNA-templated, transcription, DNA-templated		1.56788	1.00582	1.58863		-1
AN0721	flbE	Protein involved in regulation of conidiophore development; interacts with putative transcription factor FlbB; specific to filamentous fungi		0.216662	0.232016	0.160213
AN0737		Possible pseudogene, similar to Zn(II)2Cys6 transcription factor		0.0102651	1.01202	1.02415
AN0742		Has domain(s) with predicted DNA binding, DNA-binding transcription factor activity, RNA polymerase II-specific, zinc ion binding activity and role in regulation of transcription, DNA-templated, transcription, DNA-templated		-0.779126	-1.50888	-0.807338
AN0748		Has domain(s) with predicted DNA-binding transcription factor activity, sequence-specific DNA binding activity and role in regulation of transcription, DNA-templated		-1.31283	-1.38752	-0.52441
AN0816		Ortholog(s) have TBP-class protein binding, transcription coregulator activity and role in RNA polymerase II preinitiation complex assembly, transcription initiation from RNA polymerase II promoter		0.0360897	0.0616106	0.129606
AN0817		Ortholog(s) have DNA-binding transcription factor activity, RNA polymerase II-specific activity		0.101305	-0.111064	-0.383867
AN0835		Has domain(s) with predicted DNA-binding transcription factor activity, RNA polymerase II-specific, zinc ion binding activity, role in regulation of transcription, DNA-templated and nucleus localization		0.922292	0.535382	1.2942
AN0853		Has domain(s) with predicted DNA binding, DNA-binding transcription factor activity, RNA polymerase II-specific, zinc ion binding activity and role in regulation of transcription, DNA-templated, transcription, DNA-templated		0.883526	1.66215	2.03307
AN0885		Has domain(s) with predicted DNA binding, DNA-binding transcription factor activity, sequence-specific DNA binding activity and role in regulation of transcription, DNA-templated		-0.22291	-0.661963	-0.883197
AN0891	uaY	Zn(2)-Cys(6) binuclear cluster domain transcription factor required for positive regulation of genes involved in purine degradation pathway in response to uric acid; homology to Neurospora crassa pco-1		-0.361967	-1.07687	-0.996561
AN0902		Has domain(s) with predicted DNA-binding transcription factor activity, RNA polymerase II-specific, zinc ion binding activity, role in regulation of transcription, DNA-templated and nucleus localization		0.984774	1.5537	0.900117
AN0937		Has domain(s) with predicted DNA binding, DNA-binding transcription factor activity, RNA polymerase II-specific, zinc ion binding activity and role in regulation of transcription, DNA-templated, transcription, DNA-templated		-0.120639	-0.433814	-0.396489
AN0973	brlA	C2H2 zinc finger transcription factor, fphA- and lreB-dependent light induced regulator of conidiophore development; locus has 2 overlapping transcriptional units called brlA alpha and brlA beta; see 5' brlA micro-ORF, AN0974		2.9117	5.76104	5.39468		-1
AN0989		Has domain(s) with predicted role in DNA-templated transcription, initiation and transcription factor TFIID complex localization		0.0170892	-0.0508739	-0.0420646
AN10059		Putative Zn(II)C6 domain containing transcription factor; predicted NirA binding site in promoter; transcript repressed by nitrate		1.43679	1.80476	2.54687		-1
AN10083		Has domain(s) with predicted DNA-binding transcription factor activity, DNA-binding transcription factor activity, RNA polymerase II-specific, zinc ion binding activity and role in regulation of transcription, DNA-templated		-0.466493	-0.286609	-0.345747
AN10120		Has domain(s) with predicted DNA binding, DNA-binding transcription factor activity, RNA polymerase II-specific, zinc ion binding activity and role in regulation of transcription, DNA-templated, transcription, DNA-templated		1.46627	1.45689	1.15807		-1
AN10128		Has domain(s) with predicted DNA binding, DNA-binding transcription factor activity, RNA polymerase II-specific, zinc ion binding activity and role in regulation of transcription, DNA-templated, transcription, DNA-templated		0.114887	0.190773	0.32265
AN10151		Possible pseudogene, similar to Zn(II)2Cys6 transcription factor		0.279709	-0.450602	-0.495584
AN10262		Has domain(s) with predicted DNA-binding transcription factor activity, DNA-binding transcription factor activity, RNA polymerase II-specific, zinc ion binding activity and role in regulation of transcription, DNA-templated		-0.587352	-0.731721	-1.29537
AN1028		Has domain(s) with predicted DNA-binding transcription factor activity, RNA polymerase II-specific, zinc ion binding activity, role in regulation of transcription, DNA-templated and nucleus localization		0.781615	0.0727456	0.383059
AN10294		Has domain(s) with predicted DNA-binding transcription factor activity, RNA polymerase II-specific, zinc ion binding activity, role in regulation of transcription, DNA-templated and nucleus localization		-0.811884	-0.938469	-0.540484
AN10300		Has domain(s) with predicted DNA-binding transcription factor activity, RNA polymerase II-specific, zinc ion binding activity, role in regulation of transcription, DNA-templated and nucleus localization		1.24938	2.58451	1.02827		-1		1
AN10331		Has domain(s) with predicted DNA binding, DNA-binding transcription factor activity, RNA polymerase II-specific, zinc ion binding activity and role in regulation of transcription, DNA-templated, transcription, DNA-templated		0.411446	0.538425	0.853621
AN10334		Has domain(s) with predicted DNA binding, DNA-binding transcription factor activity, DNA-binding transcription factor activity, RNA polymerase II-specific, sequence-specific DNA binding, zinc ion binding activity		0.0249683	-0.00525548	0.086257
AN10341		Possible pseudogene, similar to Myb-like transcription factor		0.512662	0.509987	0.391909
AN10378	zipC	Putative bZIP transcription factor		-0.785421	-1.29155	-1.0364
AN10384		Possible C6 transcription factor; ortholog of A. fumigatus Afu2g07480 and Afu5g14530		3.73703	3.98237	-0.230969
AN10463		Has domain(s) with predicted DNA binding, DNA-binding transcription factor activity, RNA polymerase II-specific, zinc ion binding activity and role in regulation of transcription, DNA-templated, transcription, DNA-templated		-1.31631	2.7015	2.51714
AN10467		Has domain(s) with predicted DNA-binding transcription factor activity, RNA polymerase II-specific, zinc ion binding activity, role in regulation of transcription, DNA-templated and nucleus localization		-0.663306	-0.527471	0.557745
AN10491		Putative transcription factor; predicted role in secondary metabolite production		0.740589	0.570241	0.0702369
AN10492	thiA	Ortholog(s) have phosphoprotein binding activity		0.626692	1.13744	1.41026
AN10501		Ortholog(s) have RNA polymerase I core promoter sequence-specific DNA binding activity and role in positive regulation of transcription initiation from RNA polymerase II promoter, transcription initiation from RNA polymerase I promoter		1.07161	1.23298	0.822299
AN10541		Has domain(s) with predicted DNA binding, DNA-binding transcription factor activity, RNA polymerase II-specific, nucleic acid binding, protein kinase regulator activity, zinc ion binding activity		-0.566361	-0.746101	-0.829813
AN10543	galX	Putative transcription factor required for galactose utilization		7.37159	0.143575	0.374346			1
AN10548		Has domain(s) with predicted DNA binding, DNA-binding transcription factor activity, RNA polymerase II-specific, zinc ion binding activity and role in regulation of transcription, DNA-templated, transcription, DNA-templated		1.96236	2.78814	2.14721		-1
AN10550	galR	Zn(2)Cys(6) binuclear cluster domain transcription factor involved in regulation of genes of galactose conversion pathway		6.57739	-0.107895	-1.25531			1		-1
AN10597		Has domain(s) with predicted DNA-binding transcription factor activity, RNA polymerase II-specific, zinc ion binding activity, role in regulation of transcription, DNA-templated and nucleus localization		0.490003	0.788522	0.961419
AN10600		Predicted transcription factor; secondary metabolite gene cluster member; coregulated with the NRPS AN4827		2.01821	2.69125	2.6477		-1
AN10606		Has domain(s) with predicted DNA-binding transcription factor activity, RNA polymerase II-specific, zinc ion binding activity, role in regulation of transcription, DNA-templated and nucleus localization		-0.110192	-0.104816	-0.397938
AN10659		Has domain(s) with predicted DNA binding, DNA-binding transcription factor activity, RNA polymerase II-specific, zinc ion binding activity and role in regulation of transcription, DNA-templated, transcription, DNA-templated		2.61942	1.22407	0.848992			1
AN10670		Has domain(s) with predicted DNA binding, DNA-binding transcription factor activity, RNA polymerase II-specific, zinc ion binding activity and role in regulation of transcription, DNA-templated, transcription, DNA-templated		0.971049	1.13532	0.512019
AN10697		Has domain(s) with predicted DNA binding, DNA-binding transcription factor activity, RNA polymerase II-specific, zinc ion binding activity and role in regulation of transcription, DNA-templated, transcription, DNA-templated		0.694214	0.296231	1.63863
AN1077		Has domain(s) with predicted DNA binding, DNA-binding transcription factor activity, RNA polymerase II-specific, zinc ion binding activity and role in regulation of transcription, DNA-templated, transcription, DNA-templated		-1.43933	0.147093	1.53028			-1		1
AN10775		Has domain(s) with predicted DNA-binding transcription factor activity, RNA polymerase II-specific, zinc ion binding activity, role in regulation of transcription, DNA-templated and nucleus localization		0.582631	1.34617	0.851659
AN10789		Has domain(s) with predicted DNA binding, DNA-binding transcription factor activity, RNA polymerase II-specific, zinc ion binding activity and role in regulation of transcription, DNA-templated, transcription, DNA-templated		1.08028	1.12919	1.28717		-1
AN10897		Has domain(s) with predicted DNA-binding transcription factor activity, RNA polymerase II-specific, zinc ion binding activity, role in regulation of transcription, DNA-templated and nucleus localization		2.31278	1.74328	5.04411		-1			1
AN10910		Has domain(s) with predicted DNA binding, DNA-binding transcription factor activity, RNA polymerase II-specific, nucleic acid binding, zinc ion binding activity		-2.35878	-3.39805	-2.32667		1		-1
AN10911		Has domain(s) with predicted DNA-binding transcription factor activity, RNA polymerase II-specific, zinc ion binding activity, role in regulation of transcription, DNA-templated and nucleus localization		0.814819	0.441118	0.156666
AN10912		Has domain(s) with predicted DNA-binding transcription factor activity, RNA polymerase II-specific, zinc ion binding activity, role in regulation of transcription, DNA-templated and nucleus localization		-0.92243	-0.809281	-0.997143
AN10957		Has domain(s) with predicted DNA binding, DNA-binding transcription factor activity, RNA polymerase II-specific, zinc ion binding activity and role in regulation of transcription, DNA-templated, transcription, DNA-templated		0.138354	0.284238	-0.0201272
AN10961		Has domain(s) with predicted DNA binding, DNA-binding transcription factor activity, RNA polymerase II-specific, zinc ion binding activity and role in regulation of transcription, DNA-templated, transcription, DNA-templated		1.0692	1.10983	1.42834		-1
AN10970		RNA polymerase I transcription factor TFIIS, subunit A12.2; ortholog of S. cerevisiae Rpa12p; expression reduced after exposure to farnesol		-0.538115	-0.181725	-0.740285
AN10976		Has domain(s) with predicted DNA binding, DNA-binding transcription factor activity, RNA polymerase II-specific, zinc ion binding activity and role in regulation of transcription, DNA-templated, transcription, DNA-templated		-0.251961	-0.232493	-0.510739
AN10979		Has domain(s) with predicted DNA binding, DNA-binding transcription factor activity, RNA polymerase II-specific, zinc ion binding activity and role in regulation of transcription, DNA-templated, transcription, DNA-templated		-1.32931	-2.02208	-1.82731		1
AN11003		Has domain(s) with predicted DNA binding, DNA-binding transcription factor activity, RNA polymerase II-specific, zinc ion binding activity and role in regulation of transcription, DNA-templated, transcription, DNA-templated		0.50561	0.905204	0.876216
AN11093		Has domain(s) with predicted DNA binding, DNA-binding transcription factor activity, DNA-binding transcription factor activity, RNA polymerase II-specific, zinc ion binding activity		1.1253	-0.705065	0.424806
AN11099		Has domain(s) with predicted DNA-binding transcription factor activity, RNA polymerase II-specific, zinc ion binding activity, role in regulation of transcription, DNA-templated and nucleus localization		0.246205	0.0353889	0.748571
AN11112		Has domain(s) with predicted DNA binding, DNA-binding transcription factor activity, RNA polymerase II-specific, nucleic acid binding, zinc ion binding activity		0.640116	1.63443	2.26118
AN11125		Ortholog(s) have glycine-tRNA ligase activity, role in DNA-templated transcription, termination, glycyl-tRNA aminoacylation, mitochondrial glycyl-tRNA aminoacylation and cytoplasm, mitochondrion localization		-0.243296	-0.427544	-0.838582
AN11165		Has domain(s) with predicted DNA-binding transcription factor activity, RNA polymerase II-specific, zinc ion binding activity, role in regulation of transcription, DNA-templated and nucleus localization		0.51202	0.352818	0.788922
AN11169		Has domain(s) with predicted DNA binding, DNA-binding transcription factor activity, RNA polymerase II-specific, zinc ion binding activity and role in regulation of transcription, DNA-templated, transcription, DNA-templated		-0.587821	-0.426574	0.309257
AN11185		Has domain(s) with predicted DNA binding, DNA-binding transcription factor activity, DNA-binding transcription factor activity, RNA polymerase II-specific, zinc ion binding activity		-1.92212	-2.39373	-1.32707		1
AN11195		Has domain(s) with predicted DNA binding, DNA-binding transcription factor activity, RNA polymerase II-specific, nucleic acid binding, zinc ion binding activity		0.271339	-0.279546	-0.551579
AN11216		Has domain(s) with predicted DNA binding, DNA-binding transcription factor activity, DNA-binding transcription factor activity, RNA polymerase II-specific, zinc ion binding activity		0.52754	0.589377	-0.0166427
AN11222		Has domain(s) with predicted DNA-binding transcription factor activity, RNA polymerase II-specific, zinc ion binding activity, role in regulation of transcription, DNA-templated and nucleus localization		1.1446	1.33349	2.13207		-1
AN1134	qutA	Putative zinc-finger transcription factor, positive regulator of the quinic acid utilization (qut) cluster		-0.106398	-0.0876119	-0.2834
AN11753		Has domain(s) with predicted DNA-binding transcription factor activity, RNA polymerase II-specific, zinc ion binding activity, role in regulation of transcription, DNA-templated and nucleus localization		1.13083	1.70856	1.99442		-1
AN11818		Has domain(s) with predicted DNA-binding transcription factor activity, RNA polymerase II-specific, zinc ion binding activity, role in regulation of transcription, DNA-templated and nucleus localization		3.38279	2.52701	2.48981		-1
AN1183		Has domain(s) with predicted DNA binding, DNA-binding transcription factor activity, RNA polymerase II-specific, zinc ion binding activity and role in regulation of transcription, DNA-templated, transcription, DNA-templated		2.64829	4.05562	4.26504		-1
AN11891	zipA	Putative bZIP transcription factor		0.0698026	0.0447968	-0.048093
AN11950		Has domain(s) with predicted DNA binding, DNA-binding transcription factor activity, RNA polymerase II-specific, zinc ion binding activity and role in regulation of transcription, DNA-templated, transcription, DNA-templated		0	2.33423	1.45357
AN12120		Has domain(s) with predicted DNA-binding transcription factor activity, RNA polymerase II-specific, zinc ion binding activity, role in regulation of transcription, DNA-templated and nucleus localization		0.147785	0.0999382	0.587157
AN12148		Has domain(s) with predicted DNA binding, DNA-binding transcription factor activity, RNA polymerase II-specific, zinc ion binding activity and role in regulation of transcription, DNA-templated, transcription, DNA-templated		0.241601	-0.0847768	-0.317875
AN1217		Putative LIM/homeobox transcription factor; transcript upregulated in response to camptothecin		0.172175	0.427185	-0.906221
AN1227		Ortholog(s) have RNA polymerase II activating transcription factor binding activity		0.119743	0.366475	0.195633
AN12442		Has domain(s) with predicted DNA binding, DNA-binding transcription factor activity, RNA polymerase II-specific, zinc ion binding activity and role in regulation of transcription, DNA-templated, transcription, DNA-templated		2.37961	3.22353	1.45053		-1
AN1265	zapA	Putative transcription factor, similar to S.cerevisiae ZAP1 and A. fumigatus zafA, which are regulators of zinc homeostasis		0.512223	0.417889	0.176441
AN13001		Has domain(s) with predicted DNA-binding transcription factor activity, RNA polymerase II-specific, zinc ion binding activity, role in regulation of transcription, DNA-templated and nucleus localization		2.00659	3.44187	1.78477		-1		1
AN1303	scfA	Putative Zn2-Cys6 binuclear cluster domain transcription factor; required for transcriptional activation of genes involved in utilization of short-chain fatty acids; transcript repressed by nitrogen limitation		-1.49278	-1.4763	-2.03921		1
AN1353		Ortholog(s) have role in RNA polymerase II preinitiation complex assembly, transcription by RNA polymerase II and transcription factor TFIID complex localization		0.313304	0.574878	0.701604
AN1368		Has domain(s) with predicted DNA-binding transcription factor activity, RNA polymerase II-specific, zinc ion binding activity, role in regulation of transcription, DNA-templated and nucleus localization		0.426648	0.348337	0.729754
AN1406		Has domain(s) with predicted DNA binding, DNA-binding transcription factor activity, RNA polymerase II-specific, zinc ion binding activity and role in regulation of transcription, DNA-templated, transcription, DNA-templated		-0.012079	-0.0207624	0.221675
AN1414	xprG	p53-like transcription factor that contains a Ndt80-like DNA-binding domain; transcriptional regulator of extracellular proteases; putative acid phosphatase with a predicted role in gluconic acid and gluconate metabolism		1.14498	1.08928	1.89155		-1
AN1425	farB	Putative transcription factor containing a Zn2-Cys6 binuclear cluster domain; required for transcriptional activation of genes involved in utilization of short-chain fatty acids; highly conserved in filamentous ascomycetes		1.44746	1.63711	1.30433		-1
AN1518		Ortholog(s) have DNA-binding transcription factor activity, RNA polymerase II-specific activity and role in cellular response to drug, positive regulation of transcription by RNA polymerase II		0.763374	0.285507	0.564712
AN1538		Ortholog(s) have RNA polymerase II complex binding activity		-0.116934	0.0829182	0.253302
AN1569		Has domain(s) with predicted DNA-binding transcription factor activity, RNA polymerase II-specific, zinc ion binding activity, role in regulation of transcription, DNA-templated and nucleus localization		0.233662	0.132246	0.610268
AN1599	pbcR	Zn(II)(2)Cys(6)-type transcription factor; responsible for the production of the diterpene compound, ent-pimara-8(14),15-diene; member of the PbcR-activated diterpene cluster		0.862657	0.417736	0.658988
AN1652	msnA	Putative zinc-finger transcription factor; induced under high-salt conditions		-0.387775	-1.19208	-0.703619
AN1678		Putative transcription factor; predicted role in secondary metabolite production		0.501586	1.61332	1.09807
AN1705		Has domain(s) with predicted DNA-binding transcription factor activity, RNA polymerase II-specific, nucleic acid binding, zinc ion binding activity, role in regulation of transcription, DNA-templated and nucleus localization		0.283612	1.04386	0.565541
AN1736		Has domain(s) with predicted DNA-binding transcription factor activity, RNA polymerase II-specific, zinc ion binding activity, role in regulation of transcription, DNA-templated and nucleus localization		0.162402	-0.0967699	1.54334					1
AN1812	jlbA	bZIP transcription factor; induced in response to amino acid starvation		-0.232109	-1.67509	-1.73201
AN1824		Has domain(s) with predicted DNA binding, DNA-binding transcription factor activity, RNA polymerase II-specific, zinc ion binding activity and role in regulation of transcription, DNA-templated, transcription, DNA-templated		-1.17296	-0.337825	0.991142
AN1829		Has domain(s) with predicted DNA-binding transcription factor activity, RNA polymerase II-specific, zinc ion binding activity, role in regulation of transcription, DNA-templated and nucleus localization		1.90259	3.37951	1.23202				1
AN1848	nosA	Zinc(II)2Cys6 putative transcription factor involved in the regulation of sexual development; mutant produces immature cleistothecia and reduced numbers of ascospores		0.108893	-0.457436	-0.434483
AN1924		Has domain(s) with predicted DNA binding, DNA-binding transcription factor activity, copper ion binding activity, role in regulation of transcription, DNA-templated and host cell nucleus, nucleus localization		0.0800931	-0.29457	0.0199327
AN1927		Putative zinc-cluster transcription factor; transcript upregulated by nitrate limitation		-0.286776	-0.41464	-0.561
AN1984		Ortholog(s) have TFIID-class transcription factor complex binding, chromatin binding, core promoter binding, lysine-acetylated histone binding, nucleosomal histone binding activity		-1.15699	-1.24308	-1.08375		1
AN2001		Has domain(s) with predicted DNA-binding transcription factor activity, RNA polymerase II-specific, zinc ion binding activity, role in regulation of transcription, DNA-templated and nucleus localization		0.627196	1.46877	1.10355
AN2020		Has domain(s) with predicted DNA binding, DNA-binding transcription factor activity, sequence-specific DNA binding activity and role in regulation of transcription, DNA-templated		1.0473	1.96623	0.798198
AN2025		Putative transcription factor; predicted role in secondary metabolite production		2.01004	-1.49885	-0.0228327			1	-1
AN2026		Putative transcription factor; predicted role in secondary metabolite production		0.54471	0.155386	0.290949
AN2036		Putative transcription factor; predicted role in secondary metabolite production; predicted secondary metabolism gene cluster member		-2.24901	-4.31218	-3.37447		1
AN2094	dopA	Putative leucine-zipper transcription factor, involved in conidiophore morphogenesis and sexual development		-0.709428	-0.851378	-0.65306
AN2122		Has domain(s) with predicted DNA binding, DNA-binding transcription factor activity, RNA polymerase II-specific, zinc ion binding activity and role in regulation of transcription, DNA-templated, transcription, DNA-templated		0.229288	0.10551	0.349498
AN2136		Has domain(s) with predicted DNA-binding transcription factor activity, RNA polymerase II-specific, zinc ion binding activity, role in regulation of transcription, DNA-templated and nucleus localization		-0.00979316	-0.452323	-0.144239
AN2181		Ortholog(s) have TBP-class protein binding activity, role in RNA polymerase II preinitiation complex assembly, transcription initiation from RNA polymerase II promoter and transcription factor TFIIA complex localization		0.202818	0.647939	0.389211
AN2270	amdA	C2H2 zinc-finger transcription factor involved in regulation of structural genes for acetamidase (amdS), formate dehydrogenase (aciA), and alcohol dehydrogenase II (alcB)		0.493608	0.437491	0.240356
AN2290	steA	STE-like transcription factor with homeobox and zinc finger domains; null mutation blocks sexual cycle but not asexual development, forms Hulle cells but no ascogenous tissue nor cleistothecia		0.993404	0.927341	0.718055
AN2324		Has domain(s) with predicted DNA binding, DNA-binding transcription factor activity, DNA-binding transcription factor activity, RNA polymerase II-specific, zinc ion binding activity		2.23073	2.76735	3.2074		-1
AN2354		Has domain(s) with predicted DNA-binding transcription factor activity, RNA polymerase II-specific, zinc ion binding activity, role in regulation of transcription, DNA-templated and nucleus localization		-0.0457508	-0.129977	0.105611
AN2367		Putative Zn(II)2Cys6 transcription factor; PalA-dependent expression independent of pH		0.337253	1.15182	2.72142					1
AN2375		Has domain(s) with predicted DNA-binding transcription factor activity, RNA polymerase II-specific, zinc ion binding activity, role in regulation of transcription, DNA-templated and nucleus localization		2.72124	3.53905	3.83353		-1
AN2421	flbC	Putative C2H2 zinc finger transcription factor; involved in regulation of conidiophore development; required for light-dependent activation of brlA transcription		0.687552	0.976862	0.381662
AN2422		Has domain(s) with predicted DNA binding, DNA-binding transcription factor activity, RNA polymerase II-specific, zinc ion binding activity and role in regulation of transcription, DNA-templated, transcription, DNA-templated		-0.0810151	0.266218	0.674169
AN2553		Has domain(s) with predicted DNA binding, DNA-binding transcription factor activity, RNA polymerase II-specific, zinc ion binding activity and role in regulation of transcription, DNA-templated, transcription, DNA-templated		1.1822	1.1928	1.44883		-1
AN2597		Has domain(s) with predicted DNA-binding transcription factor activity, RNA polymerase II-specific, zinc ion binding activity, role in regulation of transcription, DNA-templated and nucleus localization		-3.06568	0.759423	-2.233
AN2615		Has domain(s) with predicted DNA-binding transcription factor activity, RNA polymerase II-specific, zinc ion binding activity, role in regulation of transcription, DNA-templated and nucleus localization		-1.4727	-1.57472	-1.42849		1
AN2644		Has domain(s) with predicted DNA binding, DNA-binding transcription factor activity, RNA polymerase II-specific, zinc ion binding activity and role in regulation of transcription, DNA-templated, transcription, DNA-templated		0.714746	0.433704	1.67166
AN2650		Has domain(s) with predicted DNA binding, DNA-binding transcription factor activity, RNA polymerase II-specific, zinc ion binding activity and role in regulation of transcription, DNA-templated, transcription, DNA-templated		0.599141	0.676042	1.61239
AN2672		Has domain(s) with predicted DNA binding, DNA-binding transcription factor activity, RNA polymerase II-specific, zinc ion binding activity and role in regulation of transcription, DNA-templated, transcription, DNA-templated		-1.27809	-1.39881	-0.738714
AN2677		Has domain(s) with predicted DNA binding, DNA-binding transcription factor activity, RNA polymerase II-specific, zinc ion binding activity and role in regulation of transcription, DNA-templated, transcription, DNA-templated		-2.79919	-0.333911	2.12498			-1		1
AN2725		Has domain(s) with predicted DNA binding, DNA-binding transcription factor activity, RNA polymerase II-specific, zinc ion binding activity and role in regulation of transcription, DNA-templated, transcription, DNA-templated		0.409542	0.764064	0.876663
AN2780		Has domain(s) with predicted DNA binding, DNA-binding transcription factor activity, RNA polymerase II-specific, zinc ion binding activity and role in regulation of transcription, DNA-templated, transcription, DNA-templated		1.79395	2.97461	2.97705		-1
AN2782		Has domain(s) with predicted DNA-binding transcription factor activity, DNA-binding transcription factor activity, RNA polymerase II-specific, zinc ion binding activity and role in regulation of transcription, DNA-templated		0.657404	1.10393	0.813367
AN2785		Has domain(s) with predicted DNA-binding transcription factor activity, RNA polymerase II-specific, zinc ion binding activity, role in regulation of transcription, DNA-templated and nucleus localization		0.746249	1.71779	1.73911
AN2839		Has domain(s) with predicted DNA binding, DNA-binding transcription factor activity, RNA polymerase II-specific, zinc ion binding activity and role in regulation of transcription, DNA-templated, transcription, DNA-templated		0.0198982	0.267685	-0.196963
AN2855	pacC	C2H2 finger domain transcription factor; undergoes proteolytic activation in response to alkaline ambient pH; physically interacts with PalA by two-hybrid analysis		-0.0514727	0.567689	-0.346196
AN2911	atfA	Basic-region leucine zipper transcription factor; plays a role in the response of conidia to stress; expression upregulated after exposure to farnesol		-0.914958	-1.1889	-0.945321
AN2919	sltA	C2H2 zinc-finger transcription factor involved in cation homeostasis; involved in response to abiotic stress; transcript upregulated in response to camptothecin; necessary for growth on pH 8 medium		0.0935178	-0.247837	-0.0445289
AN2984	rlmA	Putative MADS-box family transcription factor; regulates cell wall hydrolase gene expression and autolysis; mutants have abnormal conidiophores arrested at metula formation		0.160958	-0.699126	-0.115686
AN2996	mbf1	Putative transcription factor; ortholog of S. cerevisiae Mbf1p; expression upregulated after exposure to farnesol		1.4097	1.50435	1.22202
AN3050		Has domain(s) with predicted DNA binding, DNA-binding transcription factor activity, RNA polymerase II-specific, zinc ion binding activity and role in regulation of transcription, DNA-templated, transcription, DNA-templated		-0.0309775	0.306377	0.0519682
AN3108		Has domain(s) with predicted DNA-binding transcription factor activity, RNA polymerase II-specific, zinc ion binding activity, role in regulation of transcription, DNA-templated and nucleus localization		0.0458193	-0.0194357	-0.197558
AN3116		Ortholog(s) have RNA polymerase III general transcription initiation factor activity, RNA polymerase III type 3 promoter sequence-specific DNA binding activity and role in positive regulation of transcription by RNA polymerase III		-0.567894	-0.744044	-1.08678
AN3120		Has domain(s) with predicted DNA binding, DNA-binding transcription factor activity, RNA polymerase II-specific, zinc ion binding activity and role in regulation of transcription, DNA-templated, transcription, DNA-templated		0.177145	-0.246091	-0.146914
AN3152	nsdD	Predicted GATA-type zinc-finger transcription factor required for sexual development; transcript induced by nitrositive stress		0.599284	0.780767	-0.04177
AN3216		Has domain(s) with predicted DNA-binding transcription factor activity, sequence-specific DNA binding activity and role in regulation of transcription, DNA-templated		0.376878	0.730784	0.435225
AN3224		Ortholog(s) have RNA polymerase II complex recruiting activity, RNA polymerase II core promoter sequence-specific DNA binding, activating transcription factor binding, transcription coactivator activity		-2.08407	-2.4891	-2.48436		1
AN3269		Has domain(s) with predicted DNA binding, DNA-binding transcription factor activity, RNA polymerase II-specific, zinc ion binding activity and role in regulation of transcription, DNA-templated, transcription, DNA-templated		0.759734	0.716641	1.32072
AN3280		Has domain(s) with predicted DNA-binding transcription factor activity, RNA polymerase II-specific, zinc ion binding activity, role in regulation of transcription, DNA-templated and nucleus localization		-0.619443	-0.174539	-1.6274					-1
AN3300		Has domain(s) with predicted DNA-binding transcription factor activity, RNA polymerase II-specific, zinc ion binding activity, role in regulation of transcription, DNA-templated and nucleus localization		1.00159	0.55877	1.26786
AN3356		Has domain(s) with predicted DNA binding, DNA-binding transcription factor activity, RNA polymerase II-specific, zinc ion binding activity and role in regulation of transcription, DNA-templated, transcription, DNA-templated		0.289464	-0.00879229	0.931244
AN3369	clrB	Zn(II)2Cys6 transcription factor; regulator of cellulose degradation gene expression; mutant deficient for growth on cellobiose and for xylanase and cellulase activity when pregrown on glucose and shifted to Avicel medium		-1.11627	0.298561	-0.0263065			-1
AN3385		Putative transcription factor; predicted role in secondary metabolite production		0.649702	-0.74355	-0.126624
AN3391		Putative transcription factor; predicted role in secondary metabolite production		1.27671	0.738259	1.40788
AN3433		Has domain(s) with predicted DNA-binding transcription factor activity, RNA polymerase II-specific, zinc ion binding activity, role in regulation of transcription, DNA-templated and nucleus localization		1.33561	-0.282758	-0.264105			1
AN3435	lreA	Putative zinc-finger transcription factor involved in blue-light responsive differentiation; interacts with LreB; similar to N. crassa blue-light-sensing component WC-1		0.10035	0.0693052	-0.143519
AN3492	scpR	C2H2 type zinc finger transcription factor; regulator of asperfuranone biosynthesis; inp secondary metabolite gene cluster member		-0.32018	-0.919841	-1.01798
AN3501		Putative transcription factor; predicted role in secondary metabolite production		0.375577	0.604388	0.642597
AN3502		Putative transcription factor; predicted role in secondary metabolite production		0.494816	0.611629	0.911532
AN3506		Putative transcription factor; predicted role in secondary metabolite production		0.486483	-0.325024	-0.16109
AN3607	lreB	Putative zinc-finger transcription factor involved in blue-light responsive differentiation; interacts with VeA, FphA, and LreA; similar to N. crassa blue-light-sensing component WC-2		0.594973	1.00829	1.44439
AN3637		Has domain(s) with predicted DNA binding, DNA-binding transcription factor activity, RNA polymerase II-specific, zinc ion binding activity and role in regulation of transcription, DNA-templated, transcription, DNA-templated		-1.18788	-1.26081	-1.46077		1
AN3650		Has domain(s) with predicted DNA binding, DNA-binding transcription factor activity, RNA polymerase II-specific, zinc ion binding activity and role in regulation of transcription, DNA-templated, transcription, DNA-templated		0.753135	0.493333	0.550296
AN3684		Has domain(s) with predicted DNA binding, DNA-binding transcription factor activity, RNA polymerase II-specific, zinc ion binding activity and role in regulation of transcription, DNA-templated, transcription, DNA-templated		0.439676	0.925997	1.13092
AN3768		Has domain(s) with predicted DNA-binding transcription factor activity, RNA polymerase II-specific, zinc ion binding activity, role in regulation of transcription, DNA-templated and nucleus localization		0.15383	0.0304659	-0.0598405
AN3769		Has domain(s) with predicted DNA binding, DNA-binding transcription factor activity, RNA polymerase II-specific, zinc ion binding activity and role in regulation of transcription, DNA-templated, transcription, DNA-templated		1.4475	0.760709	1.16531
AN3835		Has domain(s) with predicted DNA binding, DNA-binding transcription factor activity, RNA polymerase II-specific, zinc ion binding activity and role in regulation of transcription, DNA-templated, transcription, DNA-templated		0.189606	0.566083	0.164686
AN3863		Has domain(s) with predicted DNA binding, DNA-binding transcription factor activity, RNA polymerase II-specific, zinc ion binding activity and role in regulation of transcription, DNA-templated, transcription, DNA-templated		-0.301745	0.595194	2.18873					1
AN3868		Has domain(s) with predicted DNA-binding transcription factor activity, DNA-binding transcription factor activity, RNA polymerase II-specific, zinc ion binding activity and role in regulation of transcription, DNA-templated		1.49905	2.03603	2.00228		-1
AN3900		Has domain(s) with predicted DNA binding, DNA-binding transcription factor activity, RNA polymerase II-specific, zinc ion binding activity and role in regulation of transcription, DNA-templated, transcription, DNA-templated		0.554488	0.38133	0.415385
AN3907		Ortholog(s) have transcription factor TFIID complex localization		0.22282	0.32168	0.213175
AN3911		Putative transcription factor; predicted role in secondary metabolite production		0.959239	1.41778	1.71517
AN3986		Has domain(s) with predicted DNA-binding transcription factor activity, RNA polymerase II-specific, zinc ion binding activity, role in regulation of transcription, DNA-templated and nucleus localization		-0.0181038	-0.0945344	0.0306472
AN4035	amdR	Positively acting regulatory gene; putative Zn(II)2Cys6 transcription factor; inducer of acetamide and enzymes of omega amino acid and lactam catabolism		0.513374	0.413157	0.0530715
AN4118		Ortholog(s) have DNA-binding transcription factor activity		-1.86154	-3.3592	-3.26916		1
AN4123		Has domain(s) with predicted DNA-binding transcription factor activity, RNA polymerase II-specific, zinc ion binding activity, role in regulation of transcription, DNA-templated and nucleus localization		2.83191	2.4515	1.92054		-1
AN4175		Has domain(s) with predicted DNA binding, DNA-binding transcription factor activity, RNA polymerase II-specific, zinc ion binding activity and role in regulation of transcription, DNA-templated, transcription, DNA-templated		0.64965	2.89217	0.577501				1
AN4185		Has domain(s) with predicted DNA binding, DNA-binding transcription factor activity, RNA polymerase II-specific, zinc ion binding activity and role in regulation of transcription, DNA-templated, transcription, DNA-templated		-0.756668	-0.309289	-0.933173
AN4247		Has domain(s) with predicted DNA-binding transcription factor activity, RNA polymerase II-specific, zinc ion binding activity, role in regulation of transcription, DNA-templated and nucleus localization		-0.214745	0.428934	0.576279
AN4263	nsdC	C2H2 zinc finger transcription factor; required for sexual development; vegetative growth reduced and asexual development derepressed in null mutant; mRNA increased during sexual development and under hypoxic conditions		0.129058	-0.360478	0.195037
AN4324		Has domain(s) with predicted DNA-binding transcription factor activity, sequence-specific DNA binding activity and role in regulation of transcription, DNA-templated		2.23194	0.622308	1.82373
AN4343		Has domain(s) with predicted DNA binding, DNA-binding transcription factor activity, RNA polymerase II-specific, zinc ion binding activity and role in regulation of transcription, DNA-templated, transcription, DNA-templated		0.744643	1.08431	0.747394
AN4485		Has domain(s) with predicted DNA-binding transcription factor activity, RNA polymerase II-specific, zinc ion binding activity, role in regulation of transcription, DNA-templated and nucleus localization		-1.07425	-0.583182	-0.660043
AN4489		Has domain(s) with predicted DNA binding, DNA-binding transcription factor activity, RNA polymerase II-specific, zinc ion binding activity and role in regulation of transcription, DNA-templated, transcription, DNA-templated		0.318304	0.559	0.50828
AN4562	rsmA	Basic leucine zipper (bZIP) type transcription factor involved in regulation of secondary metabolism		-0.0461916	-0.321516	-0.193911
AN4606		Has domain(s) with predicted DNA-binding transcription factor activity, RNA polymerase II-specific, zinc ion binding activity, role in regulation of transcription, DNA-templated and nucleus localization		0.839629	0.23586	-0.290577
AN4626		Has domain(s) with predicted DNA-binding transcription factor activity, RNA polymerase II-specific, zinc ion binding activity, role in regulation of transcription, DNA-templated and nucleus localization		1.54353	1.36843	1.29359		-1
AN4694		Ortholog(s) have methylated histone binding, transcription factor binding activity		0.357007	-0.00457191	0.247508
AN4744		Has domain(s) with predicted DNA binding, DNA-binding transcription factor activity, RNA polymerase II-specific, zinc ion binding activity and role in regulation of transcription, DNA-templated, transcription, DNA-templated		-1.06887	-1.47518	-1.73505		1
AN4785		Ortholog(s) have DNA-binding transcription activator activity, RNA polymerase II-specific, DNA-binding transcription factor activity and RNA polymerase II-specific, more		-0.510219	-0.370597	-0.213295
AN4837		Has domain(s) with predicted DNA binding, DNA-binding transcription factor activity, RNA polymerase II-specific, zinc ion binding activity and role in regulation of transcription, DNA-templated, transcription, DNA-templated		0.836909	0.891283	1.06393
AN4861		Ortholog(s) have RNA polymerase II complex binding, RNA polymerase II complex recruiting activity, RNA polymerase II regulatory region DNA binding activity		-0.100259	0.167981	0.256112
AN4878		Putative transcription factor of unknown function; expression upregulated after exposure to farnesol		0.156017	0.127847	0.517612
AN4928		Ortholog(s) have RNA polymerase II general transcription initiation factor activity and role in RNA polymerase II preinitiation complex assembly, transcription initiation from RNA polymerase II promoter		0.0940504	0.143643	0.328803
AN4949		Ortholog(s) have RNA polymerase III general transcription initiation factor activity, chromatin insulator sequence binding, tDNA binding activity and role in transcription initiation from RNA polymerase III promoter		0.185208	0.790633	0.979574
AN4972		Has domain(s) with predicted DNA binding, DNA-binding transcription factor activity, RNA polymerase II-specific, zinc ion binding activity and role in regulation of transcription, DNA-templated, transcription, DNA-templated		-0.338507	-0.0686383	-0.48737
AN4985		Has domain(s) with predicted DNA-binding transcription factor activity, sequence-specific DNA binding activity and role in regulation of transcription, DNA-templated		0.0211912	-0.0118781	-0.418417
AN5048		Has domain(s) with predicted DNA binding, DNA-binding transcription factor activity, sequence-specific DNA binding activity and role in regulation of transcription, DNA-templated		-0.361658	-0.618366	-0.955492
AN5052		Has domain(s) with predicted DNA binding, DNA-binding transcription factor activity, RNA polymerase II-specific, zinc ion binding activity and role in regulation of transcription, DNA-templated, transcription, DNA-templated		-1.15857	-1.05144	-0.237588
AN5070		Has domain(s) with predicted DNA-binding transcription factor activity, RNA polymerase II-specific, zinc ion binding activity, role in regulation of transcription, DNA-templated and nucleus localization		0.216986	-0.400072	-0.575646
AN5170	rosA	Putative Zn(II)2Cys6 transcription factor; negative regulator of sexual development		1.45232	-0.802151	0.00458022			1
AN5218	metZ	Putative bZIP transcription factor involved in regulation of sulfur metabolism		-0.00462031	0.739434	0.744334
AN5259		Has domain(s) with predicted DNA-binding transcription factor activity, RNA polymerase II-specific, zinc ion binding activity, role in regulation of transcription, DNA-templated and nucleus localization		0.799918	0.40721	1.89973					1
AN5279		Has domain(s) with predicted DNA-binding transcription factor activity, RNA polymerase II-specific, zinc ion binding activity, role in regulation of transcription, DNA-templated and nucleus localization		0.312797	0.489564	-0.0612787
AN5294		Has domain(s) with predicted DNA binding, DNA-binding transcription factor activity, RNA polymerase II-specific, zinc ion binding activity and role in regulation of transcription, DNA-templated, transcription, DNA-templated		1.78007	2.8225	0.79969				1
AN5299		Has domain(s) with predicted DNA binding, DNA-binding transcription factor activity, RNA polymerase II-specific, zinc ion binding activity and role in regulation of transcription, DNA-templated, transcription, DNA-templated		0.821959	0.801065	0.664047
AN5349		Has domain(s) with predicted DNA-binding transcription factor activity, RNA polymerase II-specific, zinc ion binding activity, role in regulation of transcription, DNA-templated and nucleus localization		-0.176761	-0.522692	-0.412567
AN5390		Has domain(s) with predicted DNA-binding transcription factor activity, RNA polymerase II-specific, zinc ion binding activity, role in regulation of transcription, DNA-templated and nucleus localization		0.0327937	0.549705	0.443199
AN5405		Putative bZIP-containing transcription factor; transcript is induced by nitrate		0.676693	0.230134	1.52389
AN5412		Has domain(s) with predicted DNA-binding transcription factor activity, RNA polymerase II-specific, zinc ion binding activity, role in regulation of transcription, DNA-templated and nucleus localization		0.00434987	0.12032	0.586019
AN5431		Has domain(s) with predicted DNA binding, DNA-binding transcription factor activity, RNA polymerase II-specific, zinc ion binding activity and role in regulation of transcription, DNA-templated, transcription, DNA-templated		2.41502	1.01443	0.96911			1
AN5498		Ortholog(s) have transcription factor TFIIE complex localization		0.116616	0.251486	0.245754
AN5533		Has domain(s) with predicted DNA-binding transcription factor activity, RNA polymerase II-specific, zinc ion binding activity, role in regulation of transcription, DNA-templated and nucleus localization		0.0371546	0.0265525	-0.269392
AN5555		Has domain(s) with predicted DNA-binding transcription factor activity, RNA polymerase II-specific, zinc ion binding activity, role in regulation of transcription, DNA-templated and nucleus localization		0.678318	1.62883	2.33407
AN5583	aslA	Putative C2H2 zinc finger transcription factor, involved in vacuolar sequestration of potassium and vacuolar biogenesis		0.134492	-0.154591	-0.300674
AN5609		Has domain(s) with predicted DNA-binding transcription factor activity, DNA-binding transcription factor activity, RNA polymerase II-specific, zinc ion binding activity and role in regulation of transcription, DNA-templated		0.600259	0.602512	0.0869426
AN5673	rhaR	Putative transcription factor involved in regulation of rhamnose utilization; possible pseudogene		1.311	1.8087	1.46226		-1
AN5726	crzA	C2H2-type zinc finger transcription factor involved in cation homeostasis; localized to nucleus in the presence of calcium, manganese or alkaline ambient pH stress; up-regulated under osmotic stress conditions; calcineurin substrate		0.0685672	-0.535988	-0.367385
AN5752		Ortholog(s) have RNA polymerase II core promoter sequence-specific DNA binding, RNA polymerase II transcription regulator recruiting activity		-0.995936	-1.35767	-1.78341
AN5775		Predicted sequence-specific DNA binding transcription factor; upregulated in A. oryzae and A. nidulans under hypoxic growth conditions		0.810168	0.130573	0.0279571
AN5808	clrA	Zn(II)2Cys6 transcription factor; predicted regulator of cellulose degradation; mutant deficient for growth on cellobiose and for xylanase and cellulase activity when pregrown on glucose and shifted to Avicel medium		1.63757	2.13121	1.52098		-1
AN5836	stuA	APSES domain transcription factor involved in regulation of conidiophore development; represses abaA and other developmentally regulated genes; locus consists of stuA-alpha and stuA-beta transcriptional units; stuA-alpha contains a uORF		0.418984	0.453034	-0.266169
AN5849		Has domain(s) with predicted DNA-binding transcription factor activity, RNA polymerase II-specific, zinc ion binding activity, role in regulation of transcription, DNA-templated and nucleus localization		0.751005	0.855948	1.05837
AN5859		Has domain(s) with predicted DNA binding, DNA-binding transcription factor activity, RNA polymerase II-specific, zinc ion binding activity and role in regulation of transcription, DNA-templated, transcription, DNA-templated		-1.66341	-1.19308	0.0556557
AN5870		Has domain(s) with predicted DNA-binding transcription factor activity, RNA polymerase II-specific, zinc ion binding activity, role in regulation of transcription, DNA-templated and nucleus localization		0.447337	0.627414	0.667587
AN5894		Ortholog(s) have RNA polymerase II C-terminal domain phosphoserine binding, RNA polymerase II complex binding, chromatin binding activity		-0.603957	-0.725376	-0.696286
AN5910		Ortholog(s) have RNA polymerase II C-terminal domain phosphoserine binding, RNA polymerase II complex binding, chromatin binding activity		-0.382522	-0.681248	-0.906366
AN5924		Has domain(s) with predicted DNA-binding transcription factor activity, RNA polymerase II-specific, zinc ion binding activity, role in regulation of transcription, DNA-templated and nucleus localization		0.928248	1.40134	1.50846
AN5955		Has domain(s) with predicted DNA binding, DNA-binding transcription factor activity, RNA polymerase II-specific, zinc ion binding activity and role in regulation of transcription, DNA-templated, transcription, DNA-templated		0.306536	0.457003	0.552425
AN6030		Has domain(s) with predicted DNA binding, DNA-binding transcription factor activity, RNA polymerase II-specific, zinc ion binding activity and role in regulation of transcription, DNA-templated, transcription, DNA-templated		1.54627	2.65082	2.68777		-1
AN6062		Has domain(s) with predicted DNA-binding transcription factor activity, RNA polymerase II-specific, zinc ion binding activity, role in regulation of transcription, DNA-templated and nucleus localization		0.351157	1.15591	1.08438
AN6091		Has domain(s) with predicted DNA binding, DNA-binding transcription factor activity, RNA polymerase II-specific, zinc ion binding activity and role in regulation of transcription, DNA-templated, transcription, DNA-templated		-2.55096	-3.80144	-3.91338		1
AN6166		Ortholog(s) have transcription factor TFIIE complex localization		-0.0420104	-0.0734982	-0.181109
AN6218		Has domain(s) with predicted DNA-binding transcription factor activity, RNA polymerase II-specific, zinc ion binding activity, role in regulation of transcription, DNA-templated and nucleus localization		-0.620951	1.08941	0.917146
AN6221	areB	Putative GATA zinc finger transcription factor; leucine zipper motif; negative regulator of nitrogen catabolism; locus is predicted to encode areB-alpha, -beta, and -gamma transcripts		0.0821357	-0.0291778	-0.271916
AN6223		Ortholog(s) have RNA polymerase II repressing transcription factor binding, transcription coactivator activity, transcription corepressor activity		0.515309	0.749465	1.12718
AN6322		Has domain(s) with predicted DNA-binding transcription factor activity, RNA polymerase II-specific, zinc ion binding activity, role in regulation of transcription, DNA-templated and nucleus localization		-0.148163	-0.774566	-0.378777
AN6392		Has domain(s) with predicted DNA-binding transcription factor activity, RNA polymerase II-specific, zinc ion binding activity, role in regulation of transcription, DNA-templated and nucleus localization		0.415971	1.18099	0.290449
AN6396		Has domain(s) with predicted DNA binding, DNA-binding transcription factor activity, RNA polymerase II-specific, zinc ion binding activity and role in regulation of transcription, DNA-templated, transcription, DNA-templated		0.708855	0.872852	0.340975
AN6430		Putative transcription factor; predicted role in secondary metabolite production		0.509412	0.058411	0.0973226
AN6446	cicD	Predicted transcription factor; coregulated with the NRPS/AN6444; encoded within the cichorine gene cluster; possible transcriptional regulator of cluster		7.62308	5.25668	6.18468		-1	1
AN6667		Has domain(s) with predicted DNA binding, DNA-binding transcription factor activity, RNA polymerase II-specific, zinc ion binding activity and role in regulation of transcription, DNA-templated, transcription, DNA-templated		0.616139	0.766611	1.15615
AN6684		Has domain(s) with predicted DNA-binding transcription factor activity, RNA polymerase II-specific, zinc ion binding activity, role in regulation of transcription, DNA-templated and nucleus localization		0.833491	1.01634	0.792263
AN6715		Has domain(s) with predicted DNA binding, DNA-binding transcription factor activity and role in regulation of transcription, DNA-templated		-0.00991198	-0.119026	-0.0635483
AN6747		Has domain(s) with predicted DNA binding, DNA-binding transcription factor activity, RNA polymerase II-specific, zinc ion binding activity and role in regulation of transcription, DNA-templated, transcription, DNA-templated		5.14207	6.86451	5.82302		-1		1
AN6762		Has domain(s) with predicted DNA binding, DNA-binding transcription factor activity, RNA polymerase II-specific, zinc ion binding activity and role in regulation of transcription, DNA-templated, transcription, DNA-templated		0.575929	0.39601	-0.374393
AN6788		Putative transcription factor; predicted role in secondary metabolite production		-0.729526	-0.832065	-2.5002					-1
AN6790		Putative transcription factor; predicted role in secondary metabolite production		-0.521205	-0.536016	-0.477233
AN6828		Has domain(s) with predicted DNA-binding transcription factor activity, sequence-specific DNA binding, zinc ion binding activity and role in regulation of transcription, DNA-templated		-0.191482	-0.274405	-0.667464
AN6832		Has domain(s) with predicted DNA binding, DNA-binding transcription factor activity, RNA polymerase II-specific, zinc ion binding activity and role in regulation of transcription, DNA-templated, transcription, DNA-templated		-0.644732	1.00705	-0.653797				1
AN6837		Has domain(s) with predicted DNA-binding transcription factor activity, RNA polymerase II-specific, zinc ion binding activity, role in regulation of transcription, DNA-templated and nucleus localization		0.413539	0.606908	0.579722
AN6846		Has domain(s) with predicted DNA-binding transcription factor activity, RNA polymerase II-specific, zinc ion binding activity, role in regulation of transcription, DNA-templated and nucleus localization		0.894925	0.791672	0.851741
AN6858		Has domain(s) with predicted DNA-binding transcription factor activity, RNA polymerase II-specific, zinc ion binding activity, role in regulation of transcription, DNA-templated and nucleus localization		-0.207481	0.924859	1.23474
AN6884		Has domain(s) with predicted DNA-binding transcription factor activity, RNA polymerase II-specific, zinc ion binding activity, role in regulation of transcription, DNA-templated and nucleus localization		0.119062	0.795162	0.636131
AN6889		Ortholog(s) have DNA-binding transcription factor activity, RNA polymerase II-specific activity, role in aromatic amino acid family catabolic process, positive regulation of transcription by RNA polymerase II and nucleus localization		0.894589	1.65079	1.82518
AN7012		Has domain(s) with predicted DNA binding, DNA-binding transcription factor activity, sequence-specific DNA binding activity and role in regulation of transcription, DNA-templated		0.796298	-0.0454108	-0.152706
AN7050	farA	Putative transcription factor containing a Zn2-Cys6 binuclear cluster domain; required for transcriptional activation of genes involved in fatty acid utilization; highly conserved in filamentous ascomycetes		0.626625	0.928705	0.772715
AN7061		Putative transcription factor; predicted role in secondary metabolite production		2.72751	4.16815	3.52823		-1
AN7073		Putative transcription factor; predicted role in secondary metabolite production; predicted secondary metabolism gene cluster member; coregulated with the PKS pkgA/AN7071		5.05211	4.13352	5.28056		-1
AN7118		Has domain(s) with predicted DNA binding, DNA-binding transcription factor activity, RNA polymerase II-specific, nucleic acid binding, zinc ion binding activity		4.58569	8.29719	6.86676		-1		1
AN7189		Ortholog(s) have DNA-binding transcription factor activity		-0.026777	-0.0666382	-0.562031
AN7190		Has domain(s) with predicted DNA-binding transcription factor activity, RNA polymerase II-specific, zinc ion binding activity, role in regulation of transcription, DNA-templated and nucleus localization		2.35378	2.76745	1.87282		-1
AN7223		Has domain(s) with predicted DNA-binding transcription factor activity, DNA-binding transcription factor activity, RNA polymerase II-specific, zinc ion binding activity and role in regulation of transcription, DNA-templated		0.0967841	-0.243928	-0.46318
AN7332		Has domain(s) with predicted DNA binding, DNA-binding transcription factor activity, RNA polymerase II-specific, zinc ion binding activity and role in regulation of transcription, DNA-templated, transcription, DNA-templated		1.51865	1.96011	-0.652387
AN7342		Ortholog(s) have RNA polymerase III general transcription initiation factor activity, chromatin insulator sequence binding activity and role in transcription initiation from RNA polymerase III promoter		-0.835662	-1.05718	-0.871957
AN7343		Putative Zn(II)2Cys6-domain containing transcription factor; transcript is induced by nitrate		-0.342892	1.00176	4.96659					1
AN7376		Has domain(s) with predicted DNA-binding transcription factor activity, RNA polymerase II-specific, zinc ion binding activity, role in regulation of transcription, DNA-templated and nucleus localization		0.0874226	1.04112	0.626384
AN7507		Has domain(s) with predicted DNA binding, DNA-binding transcription factor activity, RNA polymerase II-specific, zinc ion binding activity and role in regulation of transcription, DNA-templated, transcription, DNA-templated		-0.108572	0.314113	0.402821
AN7508		Has domain(s) with predicted DNA binding, DNA-binding transcription factor activity, RNA polymerase II-specific, zinc ion binding activity and role in regulation of transcription, DNA-templated, transcription, DNA-templated		1.77762	2.02299	1.74496		-1
AN7513	napA	Homologous to bZIP family transcription factor human AP-1 and Aspergillus nidulans AtfA		-0.338986	-0.410179	0.112739
AN7542	flbB	Basic leucine zipper transcription factor involved in regulation of conidiophore development; localizes to the most apical nucleus and the tip of mature vegetative hyphae; required for light-dependent activation of brlA transcription		-0.534275	-0.495194	-0.433187
AN7553	devR	Basic helix-loop-helix transcription factor required for normal conidiophore development; mutants are infertile in self-crosses		0.997822	0.147003	1.03269
AN7559		Has domain(s) with predicted role in transcription initiation from RNA polymerase II promoter and transcription factor TFIID complex localization		-0.0798272	-0.0780335	-0.0930213
AN7592		Has domain(s) with predicted DNA-binding transcription factor activity, DNA-binding transcription factor activity, RNA polymerase II-specific, zinc ion binding activity and role in regulation of transcription, DNA-templated		0.142415	-0.714376	0.317358
AN7596		Has domain(s) with predicted DNA-binding transcription factor activity, RNA polymerase II-specific, zinc ion binding activity, role in regulation of transcription, DNA-templated and nucleus localization		1.40256	-0.296817	-0.805322			1
AN7610	xlnR	Predicted GAL4-type zinc finger transcription factor involved in regulation of genes of xylan degradation; regulated by CreA, the mediator of carbon catabolite repression; transcriptionally induced by growth on xylose		0.113795	0.73055	0.751312
AN7734	anbH1	Basic-region helix-loop-helix (bHLH) transcription factor; represses expression of the penicillin biosynthesis gene aatA		0.316625	1.60066	2.46566
AN7776		Has domain(s) with predicted DNA-binding transcription factor activity, RNA polymerase II-specific, zinc ion binding activity, role in regulation of transcription, DNA-templated and nucleus localization		0.407154	0.616472	0.0784505
AN7867		Has domain(s) with predicted DNA-binding transcription factor activity, RNA polymerase II-specific, zinc ion binding activity, role in regulation of transcription, DNA-templated and nucleus localization		-3.43662	-1.03432	-1.13339		1	-1
AN7872		Predicted transcription factor; predicted secondary metabolism gene cluster member		-0.919238	-1.45676	-0.788294
AN7896	dbaA	Zn(II)2Cys6 transcription factor with a role in secondary metabolite biosynthesis; member of the dba gene cluster; overexpression upregulates dba gene cluster expression; dba cluster expression is coregulated		1.20337	-3.30103	-4.40826			1		-1
AN7901	dbaG	Putative fungal transcription factor (no conserved domain); member of the dba gene cluster; dba cluster expression is coregulated		0.381099	-1.21463	-0.0344544				-1
AN7919		Has domain(s) with predicted DNA binding, DNA-binding transcription factor activity, RNA polymerase II-specific, zinc ion binding activity and role in regulation of transcription, DNA-templated, transcription, DNA-templated		1.68573	3.40937	3.35998		-1
AN7921		Has domain(s) with predicted DNA binding, DNA-binding transcription factor activity, RNA polymerase II-specific, zinc ion binding activity and role in regulation of transcription, DNA-templated, transcription, DNA-templated		-0.882272	-1.2491	-1.69865
AN7923		Has domain(s) with predicted DNA-binding transcription factor activity, RNA polymerase II-specific, zinc ion binding activity, role in regulation of transcription, DNA-templated and nucleus localization		0.0809251	0.704446	0.994633
AN7942		Has domain(s) with predicted DNA-binding transcription factor activity, RNA polymerase II-specific, zinc ion binding activity, role in regulation of transcription, DNA-templated and nucleus localization		-1.40196	-2.05496	-0.493475
AN7951		Has domain(s) with predicted DNA binding, DNA-binding transcription factor activity, RNA polymerase II-specific, zinc ion binding activity and role in regulation of transcription, DNA-templated, transcription, DNA-templated		0.253644	0.293754	0.26212
AN7997		Ortholog(s) have RNA polymerase III general transcription initiation factor activity, chromatin insulator sequence binding activity and role in transcription initiation from RNA polymerase III promoter		0.927991	0.627024	0.822733
AN8035	hsf1	Putative transcription factor; hsf1 mRNA expression increased in the presence of farnesol		0.084825	0.0543402	0.0249083
AN8079		Has domain(s) with predicted DNA binding, DNA-binding transcription factor activity, RNA polymerase II-specific, protein kinase regulator activity, zinc ion binding activity		1.31363	2.11361	1.65892		-1
AN8103		Putative transcription factor; predicted role in secondary metabolite production		-0.216237	0.0386387	-0.918479
AN8111		Putative Zn(II)2Cys6 transcription factor; predicted role in secondary metabolite production; predicted secondary metabolism gene cluster member		1.1141	1.96655	0.943314
AN8125		Has domain(s) with predicted DNA binding, DNA-binding transcription factor activity, RNA polymerase II-specific, zinc ion binding activity and role in regulation of transcription, DNA-templated, transcription, DNA-templated		-0.195891	-0.202533	-0.148917
AN8161		Has domain(s) with predicted DNA binding, DNA-binding transcription factor activity, RNA polymerase II-specific, zinc ion binding activity and role in regulation of transcription, DNA-templated, transcription, DNA-templated		-0.684528	-0.477818	-0.578056
AN8164		Has domain(s) with predicted DNA binding, DNA-binding transcription factor activity, RNA polymerase II-specific, zinc ion binding activity and role in regulation of transcription, DNA-templated, transcription, DNA-templated		0.200461	1.10431	2.18666					1
AN8177		Putative glucose responsive transcription factor		1.84793	0.857384	2.97352					1
AN8251	hapX	bZIP transcription factor; physically interacts with CCAAT-complex protein HapB and HapE by two-hybrid; synthetically lethal with sreA; expression repressed by iron; mutants have increased ferricrocin and decreased triacetyl fusarinine C		-0.0275561	0.278489	0.0136034
AN8271	palcA	Predicted basic helix-loop-helix transcription factor, involved in regulation of phosphate acquisition		0.540998	-0.329958	-0.698521
AN8298		Has domain(s) with predicted DNA binding, DNA-binding transcription factor activity, RNA polymerase II-specific, zinc ion binding activity and role in regulation of transcription, DNA-templated, transcription, DNA-templated		1.52722	1.91909	2.21234		-1
AN8345		Has domain(s) with predicted DNA-binding transcription factor activity, RNA polymerase II-specific, zinc ion binding activity, role in regulation of transcription, DNA-templated and nucleus localization		-1.15926	-2.38328	-2.85308		1
AN8355		Has domain(s) with predicted DNA binding, DNA-binding transcription factor activity, RNA polymerase II-specific, zinc ion binding activity and role in regulation of transcription, DNA-templated, transcription, DNA-templated		2.04196	2.44327	2.56602		-1
AN8357		Has domain(s) with predicted DNA binding, DNA-binding transcription factor activity, RNA polymerase II-specific, nucleic acid binding, zinc ion binding activity		1.74217	3.5896	2.5972		-1
AN8391		Has domain(s) with predicted DNA-binding transcription factor activity, RNA polymerase II-specific, zinc ion binding activity, role in regulation of transcription, DNA-templated and nucleus localization		1.77745	1.77865	1.75466		-1
AN8414	apdR	Putative transcription factor; member of the aspyridone (apd) gene cluster; role in aspyridone production		-1.43422	-1.05677	-1.3012		1
AN8426		Has domain(s) with predicted DNA binding, DNA-binding transcription factor activity, RNA polymerase II-specific, zinc ion binding activity and role in regulation of transcription, DNA-templated, transcription, DNA-templated		1.75856	2.19549	1.11097		-1
AN8431		Has domain(s) with predicted DNA-binding transcription factor activity, RNA polymerase II-specific, zinc ion binding activity, role in regulation of transcription, DNA-templated and nucleus localization		-0.639266	-1.33843	-1.23533
AN8441		Has domain(s) with predicted DNA binding, DNA-binding transcription factor activity, RNA polymerase II-specific, zinc ion binding activity and role in regulation of transcription, DNA-templated, transcription, DNA-templated		3.06229	0.00348415	0.883791			1
AN8447		Has domain(s) with predicted DNA binding, DNA-binding transcription factor activity, RNA polymerase II-specific, zinc ion binding activity and role in regulation of transcription, DNA-templated, transcription, DNA-templated		-0.934531	2.83445	1.83181
AN8460		Has domain(s) with predicted DNA binding, DNA-binding transcription factor activity, RNA polymerase II-specific, zinc ion binding activity and role in regulation of transcription, DNA-templated, transcription, DNA-templated		0.789111	0.747959	0.835408
AN8469		Has domain(s) with predicted DNA-binding transcription factor activity, RNA polymerase II-specific, zinc ion binding activity, role in regulation of transcription, DNA-templated and nucleus localization		1.93394	2.93597	2.068		-1
AN8473		Has domain(s) with predicted DNA binding, DNA-binding transcription factor activity, RNA polymerase II-specific, zinc ion binding activity and role in regulation of transcription, DNA-templated, transcription, DNA-templated		3.67904	6.11355	5.69399		-1
AN8506		Putative transcription factor; predicted role in secondary metabolite production		-0.116726	-0.2834	0.0291723
AN8509		Putative transcription factor; predicted role in secondary metabolite production		1.54325	4.89274	2.8104				1
AN8529		Has domain(s) with predicted DNA-binding transcription factor activity, RNA polymerase II-specific, zinc ion binding activity, role in regulation of transcription, DNA-templated and nucleus localization		-2.68908	-1.39334	-3.28475		1
AN8535		Has domain(s) with predicted DNA binding, DNA-binding transcription factor activity, RNA polymerase II-specific, zinc ion binding activity and role in regulation of transcription, DNA-templated, transcription, DNA-templated		0.340806	0.363511	0.364094
AN8590		Has domain(s) with predicted DNA binding, DNA-binding transcription factor activity, RNA polymerase II-specific, zinc ion binding activity and role in regulation of transcription, DNA-templated, transcription, DNA-templated		0.435886	0.821928	0.441501
AN8636		Has domain(s) with predicted DNA binding, DNA-binding transcription factor activity, RNA polymerase II-specific, zinc ion binding activity and role in regulation of transcription, DNA-templated, transcription, DNA-templated		-1.68699	-2.50513	-1.53724		1
AN8655		Has domain(s) with predicted DNA binding, DNA-binding transcription factor activity, RNA polymerase II-specific, zinc ion binding activity and role in regulation of transcription, DNA-templated, transcription, DNA-templated		2.51387	3.61663	3.57734		-1
AN8666		Has domain(s) with predicted DNA-binding transcription factor activity, RNA polymerase II-specific, zinc ion binding activity, role in regulation of transcription, DNA-templated and nucleus localization		-1.45227	-0.279577	-1.46528
AN8667	areA	Wide-domain GATA-type transcription factor; mediates nitrogen metabolite repression; transcript induced by nitrogen starvation and degraded in response to ammonium or glutamine; AreA accumulates in the nucleus during nitrogen starvation		1.50606	-0.873449	-1.41791			1
AN8676	mcmA	Putative MADS-box family transcription factor; ORF that was absent from the original release of version 4 of the A. nidulans annotation, but present in a previous version; reinstated into version 4 in AspGD as of July 2009		0.145095	0.142129	-0.219528
AN8694		Has domain(s) with predicted DNA-binding transcription factor activity, RNA polymerase II-specific, zinc ion binding activity, role in regulation of transcription, DNA-templated and nucleus localization		-1.15753	-0.597324	-1.05515
AN8732		Has domain(s) with predicted DNA binding, DNA-binding transcription factor activity, RNA polymerase II-specific, zinc ion binding activity and role in regulation of transcription, DNA-templated, transcription, DNA-templated		-0.187286	0.630399	0.144316
AN8735		Has domain(s) with predicted DNA binding, DNA-binding transcription factor activity, RNA polymerase II-specific, nucleic acid binding, zinc ion binding activity		0.0630001	1.47146	1.50699
AN8741	mtfA	Putative C2H2 transcription factor involved in regulation of secondary metabolism and morphogenesis		-0.420184	0.465549	-0.976985
AN8772	zipB	Putative bZIP transcription factor		1.96728	0.524516	1.31378
AN8778		Has domain(s) with predicted DNA-binding transcription factor activity, RNA polymerase II-specific, zinc ion binding activity, role in regulation of transcription, DNA-templated and nucleus localization		-0.0482466	1.83543	0.800947				1
AN8858	mcnB	Forkhead-like transcription factor; multi-copy suppressor of nimA1		-0.000496711	-0.054899	-0.444546
AN8885		Has domain(s) with predicted DNA binding, DNA-binding transcription factor activity, RNA polymerase II-specific, zinc ion binding activity and role in regulation of transcription, DNA-templated, transcription, DNA-templated		0.534742	0.0626337	-0.817774
AN8894		Has domain(s) with predicted DNA binding, DNA-binding transcription factor activity, RNA polymerase II-specific, zinc ion binding activity and role in regulation of transcription, DNA-templated, transcription, DNA-templated		0.875823	0.376233	0.438115
AN8916		Putative transcription factor; predicted role in secondary metabolite production		-1.24918	-1.02902	1.62331
AN8918		Putative transcription factor; predicted role in secondary metabolite production		-1.73274	-2.75865	-0.135432
AN8930		Has domain(s) with predicted DNA binding, DNA-binding transcription factor activity, RNA polymerase II-specific, zinc ion binding activity and role in regulation of transcription, DNA-templated, transcription, DNA-templated		0.780708	-0.20586	1.71323
AN8938		Has domain(s) with predicted DNA-binding transcription factor activity, RNA polymerase II-specific, zinc ion binding activity, role in regulation of transcription, DNA-templated and nucleus localization		1.1217	1.15168	0.822145
AN8949		Has domain(s) with predicted DNA-binding transcription factor activity, sequence-specific DNA binding activity and role in regulation of transcription, DNA-templated		4.6005	2.07018	1.36529			1
AN8973		Has domain(s) with predicted DNA-binding transcription factor activity, DNA-binding transcription factor activity, RNA polymerase II-specific, zinc ion binding activity and role in regulation of transcription, DNA-templated		-0.308077	-0.635836	-0.609169
AN9013		Has domain(s) with predicted DNA-binding transcription factor activity, RNA polymerase II-specific, zinc ion binding activity, role in regulation of transcription, DNA-templated and nucleus localization		0.89067	0.206729	0.0803212
AN9025		Has domain(s) with predicted DNA binding, DNA-binding transcription factor activity, RNA polymerase II-specific, nucleic acid binding, zinc ion binding activity		0.921502	0.843695	0.774529
AN9026		Has domain(s) with predicted DNA binding, DNA-binding transcription factor activity, RNA polymerase II-specific, zinc ion binding activity and role in regulation of transcription, DNA-templated, transcription, DNA-templated		-2.39505	-2.36771	-1.88279		1
AN9043		Has domain(s) with predicted DNA binding, DNA-binding transcription factor activity, RNA polymerase II-specific, zinc ion binding activity and role in regulation of transcription, DNA-templated, transcription, DNA-templated		0.605549	2.14698	4.0438					1
AN9047		Has domain(s) with predicted DNA binding, DNA-binding transcription factor activity, RNA polymerase II-specific, zinc ion binding activity and role in regulation of transcription, DNA-templated, transcription, DNA-templated		0.306777	0.179874	-0.00747556
AN9050		Zn(2)-Cys(6) binuclear domain-containing protein; predicted sequence-specific DNA binding transcription factor activity, zinc ion binding activity and a role in regulation of transcription; NeddH-associated protein		0.0176717	1.03536	-0.57849
AN9096		Has domain(s) with predicted DNA-binding transcription factor activity, RNA polymerase II-specific, zinc ion binding activity, role in regulation of transcription, DNA-templated and nucleus localization		1.79307	-0.792797	1.58646
AN9141		Has domain(s) with predicted DNA-binding transcription factor activity, RNA polymerase II-specific, zinc ion binding activity, role in regulation of transcription, DNA-templated and nucleus localization		0.00727088	0.832838	0.701081
AN9221		Putative transcription factor; predicted role in secondary metabolite production		-0.804659	-0.28962	-1.62617
AN9236		Putative transcription factor; predicted role in secondary metabolite production		0.398392	-2.56635	2.70198					1
AN9240		Putative C2H2 transcription factor; transcript repressed by light in developmentally competent mycelia		1.13253	3.07647	3.43157
AN9293		Has domain(s) with predicted DNA-binding transcription factor activity, RNA polymerase II-specific, zinc ion binding activity, role in regulation of transcription, DNA-templated and nucleus localization		0.0353973	-0.135909	-0.656767
AN9328		Has domain(s) with predicted DNA binding, DNA-binding transcription factor activity, sequence-specific DNA binding, zinc ion binding activity and role in regulation of transcription, DNA-templated		1.47663	1.75652	2.36677		-1
AN9373		Has domain(s) with predicted DNA-binding transcription factor activity, RNA polymerase II-specific, zinc ion binding activity, role in regulation of transcription, DNA-templated and nucleus localization		2.09234	1.36314	1.22214		-1
AN9395		Has domain(s) with predicted DNA binding, DNA-binding transcription factor activity, RNA polymerase II-specific, zinc ion binding activity and role in regulation of transcription, DNA-templated, transcription, DNA-templated		0.393619	1.23412	2.11222
AN9397	hacA	Putative basic leucine zipper (bZIP) transcription factor that regulates the unfolded protein response; hacA mRNA expression increased in the presence of farnesol		0.74287	1.07883	2.20219					1
AN9458		Has domain(s) with predicted DNA binding, DNA-binding transcription factor activity, RNA polymerase II-specific, zinc ion binding activity and role in regulation of transcription, DNA-templated, transcription, DNA-templated		4.81431	5.93878	4.93068		-1		1
AN9492	amdX	C2H2 zinc-finger transcription factor involved in regulation of acetamide catabolism; regulates amdS transcription		0.15561	-0.585623	-0.513959
AN9516		Has domain(s) with predicted DNA binding, DNA-binding transcription factor activity, RNA polymerase II-specific, zinc ion binding activity and role in regulation of transcription, DNA-templated, transcription, DNA-templated		0.112172	-0.050531	-0.598778
			Number of upregulated genes in the group:	80	103	104		18	14	14	14
			Number of downregulated genes in the group:	33	38	36		53	4	3	4
			Number of genes in the group:	371	371	371		371	371	371	371
			Total number of upregulated genes:	1749	2159	2371		918	286	322	433
			Total number of downregulated genes:	1270	1705	1960		1193	69	148	203
			Total number of genes:	10867	10867	10867		10867	10867	10867	10867
			p value for the upregulated genes:	0.002961	0.0001207	0.002453		0.9976	0.1122	0.2119	0.6223
			p value for the downregulated genes:	0.9667	0.9992	1		0.02642	0.2093	0.8857	0.9201
