# Supplementary material for: Strategies Shaping the Transcription of Carbohydrate-Active Enzyme Genes in Aspergillus nidulans
Source: J Fungi (Basel). 2022 Jan 14;8(1):79. doi: 10.3390/jof8010079 (PMC8780418; doi:10.3390/jof8010079)
Supplement: Supplementary file 1 [file jof-08-00079-s001.zip › jof-1527581-supplementary/Table S3.xlsx]

## Sheet: Overview
	Table S3 RNAseq data of secondary metabolite cluster genes.
	Sheet 1	Transcriptome data (log2FC values) of secondary metabolite cluster genes.
		Red and blue colors indicate upregulated and downregulated genes, respectively.
		Significant enrichment (Fisher's exact test, p < 0.05) of genes belonging to a secondary metabolite cluster in a gene set is highlighted with yellow.
	Sheet 2	Summary of the enrichment analyses.
		Red and blue colors indicate upregulated and downregulated clusters, respectively.
		A cluster was regarded upregulated or downregulated if the genes belonging that cluster significantly enriched (Fisher's exact test, p < 0.05) in the studied upregulated or downregulated gene set.
		Highlighted figures represent clusters upregulated ( or downregulated) in the appropriate culture relative to all the three other cultures.
	Sheet 3	Distribution of upregulated and downregulated secondary metabolism clusters among the treatments.
		The sheet contains four Venn-diagrams. In each Venn-diagrams three types of cultures are pairwise compared to the fourth cultures.
		Note, the upregulated (downregulated) clusters in the intersection of the three sets identical with clusters downregulated (upregulated) in the reference culture relative to all the other cultures.

## Sheet: Sheet 1
	Transcriptome data (log2FC values) of secondary metabolite cluster genes.
	Red and blue colors indicate upregulated and downregulated genes, respectively.
	Significant enrichment (Fisher's exact test, p < 0.05) of genes belonging to a secondary metabolite cluster in a gene set is highlighted with yellow.
Gene ID	Cluster	Key Gene			log2FC values						log2FC values
			Carbon starved cultures		Lactose containing cultures		Arabinogalactan containing cultures		Lactose containing cultures		Lactose containing cultures		Arabinogalactan containing cultures
			vs.		vs.		vs.		vs.		vs.		vs.
			Glucose containing cultures		Glucose containing cultures		Glucose containing cultures		Arabinogalactan containing cultures		Carbon starved cultures		Carbon starved cultures
AN0015	AN0016 cluster		4.701429955		2.868317001		3.902891476		-1.034574474		-1.833112954		-0.798538479
AN0016	AN0016 cluster	NRPS	-2.931667607		-3.235808984		-1.490965399		-1.744843585		-0.304141377		1.440702208
AN0017	AN0016 cluster		1.703816579		0.440885377		1.484626679		-1.043741303		-1.262931203		-0.2191899
AN0018	AN0016 cluster		3.066324552		0.846028373		2.390935242		-1.544906869		-2.220296179		-0.67538931
AN0019	AN0016 cluster		1.721391847		1.470464457		2.704567601		-1.234103144		-0.250927391		0.983175754
AN0020	AN0016 cluster		5.546586862		2.452592101		2.63288665		-0.180294549		-3.093994761		-2.913700212
AN0021	AN0016 cluster		4.486250714		0.134197435		0.696556347		-0.562358912		-4.352053279		-3.789694367
AN0022	AN0016 cluster		-1.334471404		1.126454183		1.814119165		-0.687664982		2.460925588		3.14859057
AN0023	AN0016 cluster		3.425911498		4.297712984		3.912654426		0.385058559		0.871801486		0.486742927
AN0024	AN0016 cluster		5.580856188		4.496881026		6.026606639		-1.529725614		-1.083975162		0.445750451
AN0025	AN0016 cluster		2.529871568		-1.316310497		5.140098773		-6.45640927		-3.846182065		2.610227205
AN0026	AN0016 cluster	TF	5.478706059		3.675512604		8.823104721		-5.147592117		-1.803193455		3.344398662
AN0027	AN0016 cluster		4.325649964		1.813900966		5.038486899		-3.224585933		-2.511748999		0.712836934
AN0028	AN0016 cluster		0.810126562		-2.822056816		1.135939016		-3.957995832		-3.632183378		0.325812455
AN0029	AN0016 cluster		-2.578080974		-1.066022664		-0.384782098		-0.681240566		1.51205831		2.193298876
AN10005	AN0016 cluster		4.785799235		5.101205019		4.871852112		0.229352907		0.315405783		0.086052877
		Number of upregulated genes in the group:	11		6		11		0		0		3
		Number of downregulated genes in the group:	1		1		1		9		9		2
		Number of genes in the group:	16		16		16		16		16		16
		Total number of upregulated genes:	2371		1749		2159		1098		1253		836
		Total number of downregulated genes:	1967		1276		1705		1068		1233		928
		Total number of genes:	10867		10867		10867		10867		10867		10867
		p value for the upregulated genes:	7.563e-05		0.03226		3.005e-05		1		1		0.12
		p value for the downregulated genes:	0.9591		0.8647		0.935		4.999e-06		1.647e-05		0.4022
Gene ID	Cluster	Key Gene			log2FC values						log2FC values
			Carbon starved cultures		Lactose containing cultures		Arabinogalactan containing cultures		Lactose containing cultures		Lactose containing cultures		Arabinogalactan containing cultures
			vs.		vs.		vs.		vs.		vs.		vs.
			Glucose containing cultures		Glucose containing cultures		Glucose containing cultures		Arabinogalactan containing cultures		Carbon starved cultures		Carbon starved cultures
AN0607	AN0607 (sidC) cluster	NRPS	-0.395266489		-0.119180341		0.181358218		-0.300538559		0.276086147		0.576624706
AN0608	AN0607 (sidC) cluster		1.562032454		1.034255884		0.83005423		0.204201653		-0.52777657		-0.731978224
AN0609	AN0607 (sidC) cluster		1.822991094		0.473118061		1.102658025		-0.629539964		-1.349873033		-0.720333069
		Number of upregulated genes in the group:	2		1		1		0		0		1
		Number of downregulated genes in the group:	0		0		0		0		1		1
		Number of genes in the group:	3		3		3		3		3		3
		Total number of upregulated genes:	2371		1749		2159		1098		1253		836
		Total number of downregulated genes:	1967		1276		1705		1068		1233		928
		Total number of genes:	10867		10867		10867		10867		10867		10867
		p value for the upregulated genes:	0.122		0.4093		0.4855		1		1		0.2135
		p value for the downregulated genes:	1		1		1		1		0.3033		0.235
Gene ID	Cluster	Key Gene			log2FC values						log2FC values
			Carbon starved cultures		Lactose containing cultures		Arabinogalactan containing cultures		Lactose containing cultures		Lactose containing cultures		Arabinogalactan containing cultures
			vs.		vs.		vs.		vs.		vs.		vs.
			Glucose containing cultures		Glucose containing cultures		Glucose containing cultures		Arabinogalactan containing cultures		Carbon starved cultures		Carbon starved cultures
AN10289	AN10289 cluster	DMATS-type aromatic prenyltransferase	-1.457549737		1.888832646		-3.237759374		5.126592019		3.346382382		-1.780209637
AN10295	AN10289 cluster	TF	1.283059483		0.835532979		1.181489487		-0.345956508		-0.447526504		-0.101569995
AN12125	AN10289 cluster		0		2.095711735		0		2.230086434		2.468410404		0
AN2346	AN10289 cluster		7.570938479		5.749177678		7.055403761		-1.306226084		-1.821760802		-0.515534718
AN2347	AN10289 cluster		-1.710517167		1.223526177		-0.534035165		1.757561342		2.934043344		1.176482001
		Number of upregulated genes in the group:	2		2		2		1		2		0
		Number of downregulated genes in the group:	0		0		1		1		1		0
		Number of genes in the group:	5		5		5		5		5		5
		Total number of upregulated genes:	2371		1749		2159		1098		1253		836
		Total number of downregulated genes:	1967		1276		1705		1068		1233		928
		Total number of genes:	10867		10867		10867		10867		10867		10867
		p value for the upregulated genes:	0.3003		0.1853		0.26		0.413		0.1048		1
		p value for the downregulated genes:	1		1		0.5741		0.4039		0.4524		1
Gene ID	Cluster	Key Gene			log2FC values						log2FC values
			Carbon starved cultures		Lactose containing cultures		Arabinogalactan containing cultures		Lactose containing cultures		Lactose containing cultures		Arabinogalactan containing cultures
			vs.		vs.		vs.		vs.		vs.		vs.
			Glucose containing cultures		Glucose containing cultures		Glucose containing cultures		Arabinogalactan containing cultures		Carbon starved cultures		Carbon starved cultures
AN10297	AN10297 cluster		2.143001294		3.422963626		4.876714494		-1.453750868		1.279962332		2.733713199
AN10300	AN10297 cluster	TF	1.028267556		1.249384596		2.584506182		-1.335121586		0.221117041		1.556238627
AN12115	AN10297 cluster		1.106599544		3.244353322		-0.134354742		3.378708064		2.137753778		-1.240954286
AN12116	AN10297 cluster		0.194334515		0.071054512		-0.688988181		0.760042693		-0.123280003		-0.883322696
AN12119	AN10297 cluster		-1.326569291		-1.349148809		-0.858012136		-0.491136673		-0.022579518		0.468557155
AN2396	AN10297 cluster		0.362663174		-0.884421918		-0.31665797		-0.567763948		-1.247085092		-0.679321144
AN2397	AN10297 cluster		-0.231388724		-1.477688591		-1.259067313		-0.218621277		-1.246299867		-1.027678589
AN2398	AN10297 cluster		2.291672384		2.935291371		6.545260589		-3.609969217		0.643618988		4.253588205
AN2399	AN10297 cluster		0.589104096		2.069828237		1.788425575		0.281402662		1.480724141		1.199321479
AN2400	AN10297 cluster		-1.256462401		-1.238295541		3.105571505		-4.343867046		0.01816686		4.362033907
AN2402	AN10297 cluster		1.111337264		1.556494548		-0.134354015		1.690848563		0.445157284		-1.245691279
AN2404	AN10297 cluster		-2.741284		-1.427927867		-2.531967945		1.104040078		1.313356133		0.209316055
AN2405	AN10297 cluster		0.005199654		-0.322967696		0.222776837		-0.545744533		-0.32816735		0.217577183
AN2406	AN10297 cluster		-1.809079546		-1.414669255		-1.538502259		0.123833004		0.394410291		0.270577287
AN2407	AN10297 cluster		2.006026388		4.296038808		1.971394519		2.324644289		2.29001242		-0.03463187
		Number of upregulated genes in the group:	4		4		5		3		3		4
		Number of downregulated genes in the group:	3		4		3		4		2		1
		Number of genes in the group:	15		15		15		15		15		15
		Total number of upregulated genes:	2371		1749		2159		1098		1253		836
		Total number of downregulated genes:	1967		1276		1705		1068		1233		928
		Total number of genes:	10867		10867		10867		10867		10867		10867
		p value for the upregulated genes:	0.4205		0.2122		0.1607		0.188		0.2456		0.02393
		p value for the downregulated genes:	0.5276		0.08986		0.4258		0.05253		0.5206		0.7381
Gene ID	Cluster	Key Gene			log2FC values						log2FC values
			Carbon starved cultures		Lactose containing cultures		Arabinogalactan containing cultures		Lactose containing cultures		Lactose containing cultures		Arabinogalactan containing cultures
			vs.		vs.		vs.		vs.		vs.		vs.
			Glucose containing cultures		Glucose containing cultures		Glucose containing cultures		Arabinogalactan containing cultures		Carbon starved cultures		Carbon starved cultures
AN10396	AN10396 cluster	Farnesyl-diphosphate farnesyltransferase	-0.955518851		-0.625589637		-0.906829153		0.281239516		0.329929215		0.048689698
AN10401	AN10396 cluster		-0.534429303		-1.231260782		-1.452033964		0.220773181		-0.69683148		-0.917604661
AN3375	AN10396 cluster		0.242243421		0.302433088		0.209368081		0.093065007		0.060189666		-0.032875341
		Number of upregulated genes in the group:	0		0		0		0		0		0
		Number of downregulated genes in the group:	0		1		1		0		0		0
		Number of genes in the group:	3		3		3		3		3		3
		Total number of upregulated genes:	2371		1749		2159		1098		1253		836
		Total number of downregulated genes:	1967		1276		1705		1068		1233		928
		Total number of genes:	10867		10867		10867		10867		10867		10867
		p value for the upregulated genes:	1		1		1		1		1		1
		p value for the downregulated genes:	1		0.3125		0.4007		1		1		1
Gene ID	Cluster	Key Gene			log2FC values						log2FC values
			Carbon starved cultures		Lactose containing cultures		Arabinogalactan containing cultures		Lactose containing cultures		Lactose containing cultures		Arabinogalactan containing cultures
			vs.		vs.		vs.		vs.		vs.		vs.
			Glucose containing cultures		Glucose containing cultures		Glucose containing cultures		Arabinogalactan containing cultures		Carbon starved cultures		Carbon starved cultures
AN10430	AN10430 cluster	PKS	0.813809745		3.00824643		2.949160833		0.059085597		2.194436685		2.135351088
AN10447	AN10430 cluster		-1.788431907		-0.154529255		-0.680883183		0.526353928		1.633902652		1.107548724
AN3609	AN10430 cluster		0.162644751		1.28087455		0.778152487		0.502722063		1.118229799		0.615507736
AN3611	AN10430 cluster		-0.372683467		3.5439297		3.823360379		-0.279430679		3.916613167		4.196043846
AN3612	AN10430 cluster	PKS	-1.150149873		-1.017395453		-0.153445992		-0.863949462		0.13275442		0.996703881
		Number of upregulated genes in the group:	0		3		2		0		4		3
		Number of downregulated genes in the group:	1		0		0		0		0		0
		Number of genes in the group:	5		5		5		5		5		5
		Total number of upregulated genes:	2371		1749		2159		1098		1253		836
		Total number of downregulated genes:	1967		1276		1705		1068		1233		928
		Total number of genes:	10867		10867		10867		10867		10867		10867
		p value for the upregulated genes:	1		0.03224		0.26		1		0.0007991		0.004032
		p value for the downregulated genes:	0.6316		1		1		1		1		1
Gene ID	Cluster	Key Gene			log2FC values						log2FC values
			Carbon starved cultures		Lactose containing cultures		Arabinogalactan containing cultures		Lactose containing cultures		Lactose containing cultures		Arabinogalactan containing cultures
			vs.		vs.		vs.		vs.		vs.		vs.
			Glucose containing cultures		Glucose containing cultures		Glucose containing cultures		Arabinogalactan containing cultures		Carbon starved cultures		Carbon starved cultures
AN10486	AN10486 cluster	NRPS	0.842299758		1.113262486		0.863524319		0.249738168		0.270962728		0.02122456
AN10491	AN10486 cluster	TF	0.07023688		0.740588527		0.570240543		0.170347984		0.670351647		0.500003663
AN3911	AN10486 cluster	TF	1.715171629		0.959238626		1.417780742		-0.458542116		-0.755933003		-0.297390888
		Number of upregulated genes in the group:	1		1		1		0		0		0
		Number of downregulated genes in the group:	0		0		0		0		0		0
		Number of genes in the group:	3		3		3		3		3		3
		Total number of upregulated genes:	2371		1749		2159		1098		1253		836
		Total number of downregulated genes:	1967		1276		1705		1068		1233		928
		Total number of genes:	10867		10867		10867		10867		10867		10867
		p value for the upregulated genes:	0.5222		0.4093		0.4855		1		1		1
		p value for the downregulated genes:	1		1		1		1		1		1
Gene ID	Cluster	Key Gene			log2FC values						log2FC values
			Carbon starved cultures		Lactose containing cultures		Arabinogalactan containing cultures		Lactose containing cultures		Lactose containing cultures		Arabinogalactan containing cultures
			vs.		vs.		vs.		vs.		vs.		vs.
			Glucose containing cultures		Glucose containing cultures		Glucose containing cultures		Arabinogalactan containing cultures		Carbon starved cultures		Carbon starved cultures
AN11191	AN11191 cluster (asperlin)	PKS	2.644250562		-0.647507324		0.904805101		-1.552312426		-3.291757887		-1.739445461
AN11192	AN11191 cluster (asperlin)		0.088667164		-0.189569478		-0.467945426		0.278375949		-0.278236642		-0.55661259
AN11198	AN11191 cluster (asperlin)		0.592758994		-0.354504374		-1.096139054		0.741634681		-0.947263367		-1.688898048
AN11199	AN11191 cluster (asperlin)		0.057154677		-2.797138943		-0.789164721		-2.007974223		-2.85429362		-0.846319397
AN11200	AN11191 cluster (asperlin)		-1.407814		-0.721545016		-1.064951465		0.343406449		0.686268984		0.342862535
AN9218	AN11191 cluster (asperlin)		0		0.607257076		0.827414063		-0.220156987		0.97995466		1.200111648
AN9219	AN11191 cluster (asperlin)		-3.102213954		0.262603493		-3.825683433		4.088286926		3.364817447		-0.723469479
AN9220	AN11191 cluster (asperlin)		-2.313462233		-0.096289034		-0.688922981		0.592633947		2.217173198		1.624539252
AN9221	AN11191 cluster (asperlin)	TF	-1.626173941		-0.804658979		-0.289619705		-0.515039274		0.821514962		1.336554236
		Number of upregulated genes in the group:	1		0		0		1		0		0
		Number of downregulated genes in the group:	1		0		2		1		1		1
		Number of genes in the group:	9		9		9		9		9		9
		Total number of upregulated genes:	2371		1749		2159		1098		1253		836
		Total number of downregulated genes:	1967		1276		1705		1068		1233		928
		Total number of genes:	10867		10867		10867		10867		10867		10867
		p value for the upregulated genes:	0.891		1		1		0.6167		1		1
		p value for the downregulated genes:	0.8343		1		0.4243		0.606		0.6619		0
Gene ID	Cluster	Key Gene			log2FC values						log2FC values
			Carbon starved cultures		Lactose containing cultures		Arabinogalactan containing cultures		Lactose containing cultures		Lactose containing cultures		Arabinogalactan containing cultures
			vs.		vs.		vs.		vs.		vs.		vs.
			Glucose containing cultures		Glucose containing cultures		Glucose containing cultures		Arabinogalactan containing cultures		Carbon starved cultures		Carbon starved cultures
AN9235	AN11194 cluster		-0.728578698		-3.545187488		0.128295642		-3.67348313		-2.81660879		0.85687434
AN11193	AN11194 cluster		0.052115339		-0.313169356		-0.657089061		0.343919705		-0.365284695		-0.7092044
AN11194	AN11194 cluster	DMATS-type aromatic prenyltransferase	0		0		0.827420912		-1.181944206		0		1.20011092
AN11201	AN11194 cluster		0.151188976		0.874650708		1.890480873		-1.015830165		0.723461733		1.739291897
AN11202	AN11194 cluster	DMATS-type aromatic prenyltransferase	3.910382709		-0.362580372		-2.998087888		2.635507516		-4.272963081		-6.908470597
AN9223	AN11194 cluster		3.704923022		4.495465672		0.827427761		3.66803791		0.79054265		-2.87749526
AN9224	AN11194 cluster		2.933377163		3.381613047		2.48795131		0.893661737		0.448235884		-0.445425853
AN9225	AN11194 cluster		-1.334462777		0.549822295		-0.134346226		0.684168521		1.884285072		1.200116551
AN9226	AN11194 cluster	NRPS	-0.52445105		-1.512551977		-2.577581953		1.065029977		-0.988100926		-2.053130903
AN9227	AN11194 cluster		-0.372671177		-0.354504362		-0.134346279		-0.220158082		0.018166816		0.238324898
AN9230	AN11194 cluster		1.497419353		1.868672645		0.696004444		1.172668201		0.371253292		-0.801414909
AN9231	AN11194 cluster		-3.264031571		-0.80326514		1.329190864		-2.132456004		2.46076643		4.593222435
AN9233	AN11194 cluster		0		0		0.827420912		-1.181944206		0		1.20011092
AN9234	AN11194 cluster		-3.099950909		-5.29149823		-0.674441369		-4.617056862		-2.191547321		2.42550954
		Number of upregulated genes in the group:	3		2		2		1		0		2
		Number of downregulated genes in the group:	1		2		1		1		1		2
		Number of genes in the group:	14		14		14		14		14		14
		Total number of upregulated genes:	2371		1749		2159		1098		1253		836
		Total number of downregulated genes:	1967		1276		1705		1068		1233		928
		Total number of genes:	10867		10867		10867		10867		10867		10867
		p value for the upregulated genes:	0.6178		0.6843		0.7989		0.7751		1		0.2935
		p value for the downregulated genes:	0.939		0.502		0.9085		0.7652		0.8149		0.3388
Gene ID	Cluster	Key Gene			log2FC values						log2FC values
			Carbon starved cultures		Lactose containing cultures		Arabinogalactan containing cultures		Lactose containing cultures		Lactose containing cultures		Arabinogalactan containing cultures
			vs.		vs.		vs.		vs.		vs.		vs.
			Glucose containing cultures		Glucose containing cultures		Glucose containing cultures		Arabinogalactan containing cultures		Carbon starved cultures		Carbon starved cultures
AN11193	AN9226 cluster		0.052115339		-0.313169356		-0.657089061		0.343919705		-0.365284695		-0.7092044
AN11194	AN9226 cluster	DMATS-type aromatic prenyltransferase	0		0		0.827420912		-1.181944206		0		1.20011092
AN11201	AN9226 cluster		0.151188976		0.874650708		1.890480873		-1.015830165		0.723461733		1.739291897
AN11202	AN9226 cluster	DMATS-type aromatic prenyltransferase	3.910382709		-0.362580372		-2.998087888		2.635507516		-4.272963081		-6.908470597
AN9223	AN9226 cluster		3.704923022		4.495465672		0.827427761		3.66803791		0.79054265		-2.87749526
AN9224	AN9226 cluster		2.933377163		3.381613047		2.48795131		0.893661737		0.448235884		-0.445425853
AN9225	AN9226 cluster		-1.334462777		0.549822295		-0.134346226		0.684168521		1.884285072		1.200116551
AN9226	AN9226 cluster	NRPS	-0.52445105		-1.512551977		-2.577581953		1.065029977		-0.988100926		-2.053130903
AN9227	AN9226 cluster		-0.372671177		-0.354504362		-0.134346279		-0.220158082		0.018166816		0.238324898
AN9230	AN9226 cluster		1.497419353		1.868672645		0.696004444		1.172668201		0.371253292		-0.801414909
AN9231	AN9226 cluster		-3.264031571		-0.80326514		1.329190864		-2.132456004		2.46076643		4.593222435
AN9233	AN9226 cluster		0		0		0.827420912		-1.181944206		0		1.20011092
AN9234	AN9226 cluster		-3.099950909		-5.29149823		-0.674441369		-4.617056862		-2.191547321		2.42550954
		Number of upregulated genes in the group:	3		2		2		1		0		2
		Number of downregulated genes in the group:	1		2		1		1		1		2
		Number of genes in the group:	13		13		13		13		13		13
		Total number of upregulated genes:	2371		1749		2159		1098		1253		836
		Total number of downregulated genes:	1967		1276		1705		1068		1233		928
		Total number of genes:	10867		10867		10867		10867		10867		10867
		p value for the upregulated genes:	0.5637		0.6433		0.763		0.7498		1		0.2641
		p value for the downregulated genes:	0.9255		0.4619		0.8914		0.7396		0.7912		0.3063
Gene ID	Cluster	Key Gene			log2FC values						log2FC values
			Carbon starved cultures		Lactose containing cultures		Arabinogalactan containing cultures		Lactose containing cultures		Lactose containing cultures		Arabinogalactan containing cultures
			vs.		vs.		vs.		vs.		vs.		vs.
			Glucose containing cultures		Glucose containing cultures		Glucose containing cultures		Arabinogalactan containing cultures		Carbon starved cultures		Carbon starved cultures
AN11024	AN7838 (AN12331) cluster		3.229011569		-2.346550736		0.687563703		-3.034114439		-5.575562305		-2.541447866
AN12330	AN12331 cluster, AN7838 (AN12331) cluster		-1.907130704		-1.149143576		-0.707840911		-0.441302665		0.757987128		1.199289793
AN12331	AN12331 cluster, AN7838 (AN12331) cluster	PKS	-1.820289207		-2.737221085		-1.568277946		-1.168943139		-0.916931878		0.252011261
AN7836	AN12331 cluster, AN7838 (AN12331) cluster		4.370183317		-0.353023153		2.301990878		-2.655014031		-4.72320647		-2.068192439
AN7839	AN12331 cluster, AN7838 (AN12331) cluster		0.239617334		-0.237624209		-0.424819361		0.187195152		-0.477241543		-0.664436695
		Number of upregulated genes in the group:	2		0		1		0		0		1
		Number of downregulated genes in the group:	2		3		1		3		2		2
		Number of genes in the group:	5		5		5		5		5		5
		Total number of upregulated genes:	2371		1749		2159		1098		1253		836
		Total number of downregulated genes:	1967		1276		1705		1068		1233		928
		Total number of genes:	10867		10867		10867		10867		10867		10867
		p value for the upregulated genes:	0.3003		1		0.6697		1		1		0.3299
		p value for the downregulated genes:	0.2243		0.01345		0.5741		0.008131		0.1019		0.06121
Gene ID	Cluster	Key Gene			log2FC values						log2FC values
			Carbon starved cultures		Lactose containing cultures		Arabinogalactan containing cultures		Lactose containing cultures		Lactose containing cultures		Arabinogalactan containing cultures
			vs.		vs.		vs.		vs.		vs.		vs.
			Glucose containing cultures		Glucose containing cultures		Glucose containing cultures		Arabinogalactan containing cultures		Carbon starved cultures		Carbon starved cultures
AN1242	AN1242 cluster	NRPS	0.012475613		3.700169806		-0.875981723		4.576151529		3.687694193		-0.888457335
AN1243	AN1242 cluster		0.252967402		-0.05899282		-0.007015149		-0.051977671		-0.311960222		-0.259982551
AN1244	AN1242 cluster		0.811839148		0.307190866		0.18140755		0.125783315		-0.504648282		-0.630431598
AN1245	AN1242 cluster		0.261634148		0.095337375		0.482278461		-0.386941086		-0.166296773		0.220644313
AN1246	AN1242 cluster		-4.582823005		-2.14485816		-3.683625264		1.538767104		2.437964846		0.899197741
AN1247	AN1242 cluster		0.894775435		0.346204516		0.579024189		-0.232819673		-0.548570919		-0.315751246
		Number of upregulated genes in the group:	0		1		0		2		2		0
		Number of downregulated genes in the group:	1		1		1		0		0		0
		Number of genes in the group:	6		6		6		6		6		6
		Total number of upregulated genes:	2371		1749		2159		1098		1253		836
		Total number of downregulated genes:	1967		1276		1705		1068		1233		928
		Total number of genes:	10867		10867		10867		10867		10867		10867
		p value for the upregulated genes:	1		0.6512		1		0.1163		0.5206		1
		p value for the downregulated genes:	0.6983		0.5275		0.6409		1		1		1
Gene ID	Cluster	Key Gene			log2FC values						log2FC values
			Carbon starved cultures		Lactose containing cultures		Arabinogalactan containing cultures		Lactose containing cultures		Lactose containing cultures		Arabinogalactan containing cultures
			vs.		vs.		vs.		vs.		vs.		vs.
			Glucose containing cultures		Glucose containing cultures		Glucose containing cultures		Arabinogalactan containing cultures		Carbon starved cultures		Carbon starved cultures
AN1592	AN1594 cluster		-1.860972468		-2.796562215		-3.538197844		0.741635629		-0.935589747		-1.677225375
AN1593	AN1594 cluster		-8.191691092		-3.919517803		-7.961606771		4.042088968		4.272173289		0.230084321
AN1594	AN1594 cluster	entkaurene synthases	-0.324814732		-1.170344137		-1.718575212		0.548231075		-0.845529405		-1.39376048
AN1595	AN1594 cluster		2.83329251		0.012964115		1.246218221		-1.233254107		-2.820328395		-1.587074289
AN1596	AN1594 cluster		-3.967253746		-3.007135929		-4.70165369		1.694517761		0.960117817		-0.734399944
AN1597	AN1594 cluster		-2.403868576		-1.632941289		-3.251243725		1.618302437		0.770927288		-0.847375149
AN1598	AN1594 cluster		-0.036615177		-0.166483962		-0.243001068		0.076517106		-0.129868784		-0.20638589
AN1599	AN1594 cluster	TF	0.65898762		0.862656812		0.417736246		0.444920566		0.203669193		-0.241251374
		Number of upregulated genes in the group:	1		0		1		3		1		0
		Number of downregulated genes in the group:	3		3		4		1		1		2
		Number of genes in the group:	8		8		8		8		8		8
		Total number of upregulated genes:	2371		1749		2159		1098		1253		836
		Total number of downregulated genes:	1967		1276		1705		1068		1233		928
		Total number of genes:	10867		10867		10867		10867		10867		10867
		p value for the upregulated genes:	0.8605		1		0.8301		0.03907		0.6248		1
		p value for the downregulated genes:	0.1628		0.05747		0.02489		0.563		0.6186		0.1446
Gene ID	Cluster	Key Gene			log2FC values						log2FC values
			Carbon starved cultures		Lactose containing cultures		Arabinogalactan containing cultures		Lactose containing cultures		Lactose containing cultures		Arabinogalactan containing cultures
			vs.		vs.		vs.		vs.		vs.		vs.
			Glucose containing cultures		Glucose containing cultures		Glucose containing cultures		Arabinogalactan containing cultures		Carbon starved cultures		Carbon starved cultures
AN1678	AN1680 cluster	TF	1.098068736		0.501585705		1.613322376		-1.111736672		-0.596483032		0.51525364
AN1679	AN1680 cluster		1.742219089		0.653364547		1.822112093		-1.168747546		-1.088854542		0.079893004
AN1680	AN1680 cluster	NRPS	1.481182723		0.781415456		1.104602552		-0.323187096		-0.699767267		-0.376580171
AN1681	AN1680 cluster		5.15341916		3.232058524		4.139470497		-0.907411973		-1.921360636		-1.013948663
		Number of upregulated genes in the group:	4		1		4		0		0		0
		Number of downregulated genes in the group:	0		0		0		2		2		1
		Number of genes in the group:	4		4		4		4		4		4
		Total number of upregulated genes:	2371		1749		2159		1098		1253		836
		Total number of downregulated genes:	1967		1276		1705		1068		1233		928
		Total number of genes:	10867		10867		10867		10867		10867		10867
		p value for the upregulated genes:	0.002262		0.5044		0.001555		1		1		1
		p value for the downregulated genes:	1		1		1		0.05061		0.3823		0.3003
Gene ID	Cluster	Key Gene			log2FC values						log2FC values
			Carbon starved cultures		Lactose containing cultures		Arabinogalactan containing cultures		Lactose containing cultures		Lactose containing cultures		Arabinogalactan containing cultures
			vs.		vs.		vs.		vs.		vs.		vs.
			Glucose containing cultures		Glucose containing cultures		Glucose containing cultures		Arabinogalactan containing cultures		Carbon starved cultures		Carbon starved cultures
AN1784	AN1784 cluster	PKS	0.5081953		0.075494951		0.273564486		-0.198069535		-0.432700348		-0.234630813
AN1785	AN1784 cluster		0.600706174		-0.352317357		-1.402005182		1.049687825		-0.953023531		-2.002711356
AN1786	AN1784 cluster		-0.925792703		-2.486299896		-3.033814257		0.54751436		-1.560507193		-2.108021554
AN1787	AN1784 cluster		-0.786712041		-1.996206724		-3.147189398		1.150982674		-1.209494684		-2.360477358
		Number of upregulated genes in the group:	0		0		0		0		0		0
		Number of downregulated genes in the group:	0		2		2		0		2		2
		Number of genes in the group:	4		4		4		4		4		4
		Total number of upregulated genes:	2371		1749		2159		1098		1253		836
		Total number of downregulated genes:	1967		1276		1705		1068		1233		928
		Total number of genes:	10867		10867		10867		10867		10867		10867
		p value for the upregulated genes:	1		1		1		1		1		1
		p value for the downregulated genes:	1		0.07031		0.1186		1		0.06602		0.0389
Gene ID	Cluster	Key Gene			log2FC values						log2FC values
			Carbon starved cultures		Lactose containing cultures		Arabinogalactan containing cultures		Lactose containing cultures		Lactose containing cultures		Arabinogalactan containing cultures
			vs.		vs.		vs.		vs.		vs.		vs.
			Glucose containing cultures		Glucose containing cultures		Glucose containing cultures		Arabinogalactan containing cultures		Carbon starved cultures		Carbon starved cultures
AN1792	AN1793 cluster		4.554221343		5.051848623		8.640978967		-3.589130344		0.49762728		4.086757624
AN1793	AN1793 cluster	Terpene synthase	-2.323077466		-1.791418584		-2.987120778		1.195702194		0.531658882		-0.664043312
AN1794	AN1793 cluster		-2.288592026		-0.988804703		-2.204831048		1.216026345		1.299787323		0.083760978
AN1795	AN1793 cluster		-1.468883485		-1.006208464		-1.756834361		0.750625897		0.462675022		-0.287950875
AN1796	AN1793 cluster		-0.355003986		-0.159221453		-0.290357421		0.131135968		0.195782533		0.064646565
		Number of upregulated genes in the group:	1		1		1		2		1		1
		Number of downregulated genes in the group:	3		2		3		1		0		0
		Number of genes in the group:	5		5		5		5		5		5
		Total number of upregulated genes:	2371		1749		2159		1098		1253		836
		Total number of downregulated genes:	1967		1276		1705		1068		1233		928
		Total number of genes:	10867		10867		10867		10867		10867		10867
		p value for the upregulated genes:	0.708		0.5842		0.6697		0.08294		0.4581		0.3299
		p value for the downregulated genes:	0.04433		0.1082		0.03007		0.4039		1		1
Gene ID	Cluster	Key Gene			log2FC values						log2FC values
			Carbon starved cultures		Lactose containing cultures		Arabinogalactan containing cultures		Lactose containing cultures		Lactose containing cultures		Arabinogalactan containing cultures
			vs.		vs.		vs.		vs.		vs.		vs.
			Glucose containing cultures		Glucose containing cultures		Glucose containing cultures		Arabinogalactan containing cultures		Carbon starved cultures		Carbon starved cultures
AN2921	AN2924 cluster		3.25764383		3.478298997		2.533239588		0.945059409		0.220655167		-0.724404242
AN2922	AN2924 cluster		-3.495482673		-3.499158789		-4.104207952		0.605049163		-0.003676116		-0.608725279
AN2923	AN2924 cluster		-2.019883235		-1.475526258		-2.917777787		1.442251529		0.544356976		-0.897894553
AN2924	AN2924 cluster	NRPS	3.88016298		3.915854535		3.103832917		0.812021618		0.035691555		-0.776330063
		Number of upregulated genes in the group:	2		2		2		1		0		0
		Number of downregulated genes in the group:	2		2		2		0		0		0
		Number of genes in the group:	4		4		4		4		4		4
		Total number of upregulated genes:	2371		1749		2159		1098		1253		836
		Total number of downregulated genes:	1967		1276		1705		1068		1233		928
		Total number of genes:	10867		10867		10867		10867		10867		10867
		p value for the upregulated genes:	0.2093		0.124		0.1787		0.347		1		1
		p value for the downregulated genes:	0.1523		0.07031		0.1186		1		1		1
Gene ID	Cluster	Key Gene			log2FC values						log2FC values
			Carbon starved cultures		Lactose containing cultures		Arabinogalactan containing cultures		Lactose containing cultures		Lactose containing cultures		Arabinogalactan containing cultures
			vs.		vs.		vs.		vs.		vs.		vs.
			Glucose containing cultures		Glucose containing cultures		Glucose containing cultures		Arabinogalactan containing cultures		Carbon starved cultures		Carbon starved cultures
AN3252	AN3252 cluster	Entkaurene synthase	-3.548488256		-2.359524626		-2.314237753		-0.045286873		1.18896363		1.234250503
AN3253	AN3252 cluster		0.44182888		-0.067189566		-3.438825285		3.37163572		-0.509018446		-3.880654166
AN3254	AN3252 cluster		-0.08758069		-0.601712458		-4.963070997		4.361358539		-0.514131768		-4.875490306
AN3255	AN3252 cluster		2.436166874		1.014827146		-0.209610384		1.224437529		-1.421339729		-2.645777258
AN3256	AN3252 cluster		5.438740325		3.397413613		1.636982401		1.760431213		-2.041326711		-3.801757924
AN3257	AN3252 cluster		5.58753135		4.848716923		0.358000015		4.490716908		-0.738814427		-5.229531335
		Number of upregulated genes in the group:	3		3		1		5		0		0
		Number of downregulated genes in the group:	1		1		3		0		2		5
		Number of genes in the group:	6		6		6		6		6		6
		Total number of upregulated genes:	2371		1749		2159		1098		1253		836
		Total number of downregulated genes:	1967		1276		1705		1068		1233		928
		Total number of genes:	10867		10867		10867		10867		10867		10867
		p value for the upregulated genes:	0.1224		0.05685		0.7353		1.051e-06		1		1
		p value for the downregulated genes:	0.6983		0.5275		0.0532		1		0.1417		2.507e-05
Gene ID	Cluster	Key Gene			log2FC values						log2FC values
			Carbon starved cultures		Lactose containing cultures		Arabinogalactan containing cultures		Lactose containing cultures		Lactose containing cultures		Arabinogalactan containing cultures
			vs.		vs.		vs.		vs.		vs.		vs.
			Glucose containing cultures		Glucose containing cultures		Glucose containing cultures		Arabinogalactan containing cultures		Carbon starved cultures		Carbon starved cultures
AN10388	AN3273 cluster		0.210435637		0.03321789		-0.658269359		0.691487249		-0.177217747		-0.868704997
AN10389	AN3273 cluster		0.191363321		-0.852360348		-0.223344581		-0.629015767		-1.04372367		-0.414707902
AN10402	AN3273 cluster		-3.986825763		-1.288668816		-1.562018746		0.27334993		2.698156947		2.424807017
AN12188	AN3273 cluster		0		0.607273133		2.99011201		-2.382838878		0.979960447		3.362799325
AN3269	AN3273 cluster	TF	1.320719138		0.759734159		0.716641445		0.043092714		-0.560984979		-0.604077693
AN3270	AN3273 cluster		0.334351859		-0.530028877		-1.305530499		0.775501623		-0.864380735		-1.639882358
AN3271	AN3273 cluster		0		1.467723057		1.603484307		-0.135761249		1.840417875		1.976179125
AN3272	AN3273 cluster		-1.271058532		-2.214681323		-1.994523966		0		-0.943622791		-0.723465435
AN3273	AN3273 cluster	PKS	0.55081952		-0.068311739		0.586814814		-0.655126553		-0.619131259		0.035995294
AN3275	AN3273 cluster		-3.739766044		-1.309904367		-2.416251018		1.106346652		2.429861677		1.323515025
AN3276	AN3273 cluster		-3.248829479		-2.462303192		-3.586293731		1.123990539		0.786526288		-0.337464251
AN3277	AN3273 cluster	Terpene synthase	-2.971609028		-1.504233807		-1.882349469		0.378115662		1.467375221		1.089259559
AN3278	AN3273 cluster		-3.036839597		-2.16917374		-2.590296099		0.42112236		0.867665857		0.446543497
AN3279	AN3273 cluster		-2.33248687		-1.864917995		-1.528331895		-0.3365861		0.467568875		0.804154975
AN3280	AN3273 cluster	TF	-1.627399361		-0.619442569		-0.174538986		-0.444903583		1.007956792		1.452860375
AN3281	AN3273 cluster		-2.624936761		-1.521493727		-0.574520796		-0.946972931		1.103443035		2.050415965
AN3282	AN3273 cluster		-4.421213351		-2.201205196		-4.325584791		2.124379596		2.220008156		0.09562856
AN3283	AN3273 cluster		-1.111567809		-1.880725196		-1.66056682		-0.220158375		-0.769157387		-0.548999012
AN3284	AN3273 cluster		-1.601172811		-0.306859317		-1.437319065		1.130459748		1.294313494		0.163853746
AN3285	AN3273 cluster		1.526244392		2.914994662		0.696467952		2.21852671		1.38875027		-0.829776441
AN3286	AN3273 cluster		1.081721891		1.948470785		0.96729993		0.981170855		0.866748894		-0.11442196
AN3287	AN3273 cluster		0.437714311		-0.12815336		0.373132742		-0.501286102		-0.565867671		-0.064581569
		Number of upregulated genes in the group:	3		2		0		4		6		5
		Number of downregulated genes in the group:	10		8		8		0		0		0
		Number of genes in the group:	22		22		22		22		22		22
		Total number of upregulated genes:	2371		1749		2159		1098		1253		836
		Total number of downregulated genes:	1967		1276		1705		1068		1233		928
		Total number of genes:	10867		10867		10867		10867		10867		10867
		p value for the upregulated genes:	0.8884		0.8903		1		0.1763		0.03413		0.02333
		p value for the downregulated genes:	0.00286		0.002482		0.01473		1		1		1
Gene ID	Cluster	Key Gene			log2FC values						log2FC values
			Carbon starved cultures		Lactose containing cultures		Arabinogalactan containing cultures		Lactose containing cultures		Lactose containing cultures		Arabinogalactan containing cultures
			vs.		vs.		vs.		vs.		vs.		vs.
			Glucose containing cultures		Glucose containing cultures		Glucose containing cultures		Arabinogalactan containing cultures		Carbon starved cultures		Carbon starved cultures
AN3605	AN3612 cluster		0.528871032		-0.325132491		0.032440431		-0.357572922		-0.854003523		-0.496430601
AN3606	AN3612 cluster		0.804303902		0.064595332		0.143882205		-0.079286874		-0.73970857		-0.660421696
AN3607	AN3612 cluster	TF	1.444385786		0.594972743		1.008287961		-0.413315219		-0.849413044		-0.436097825
AN3608	AN3612 cluster		0.57499097		0.60161697		0.382992652		0.218624319		0.026626		-0.191998318
AN3609	AN3612 cluster		0.162644751		1.28087455		0.778152487		0.502722063		1.118229799		0.615507736
AN3611	AN3612 cluster		-0.372683467		3.5439297		3.823360379		-0.279430679		3.916613167		4.196043846
AN3612	AN3612 cluster	PKS	-1.150149873		-1.017395453		-0.153445992		-0.863949462		0.13275442		0.996703881
AN10430	AN3612 cluster	PKS	0.813809745		3.00824643		2.949160833		0.059085597		2.194436685		2.135351088
AN10447	AN3612 cluster		-1.788431907		-0.154529255		-0.680883183		0.526353928		1.633902652		1.107548724
		Number of upregulated genes in the group:	1		3		3		0		4		3
		Number of downregulated genes in the group:	1		0		0		0		0		0
		Number of genes in the group:	9		9		9		9		9		9
		Total number of upregulated genes:	2371		1749		2159		1098		1253		836
		Total number of downregulated genes:	1967		1276		1705		1068		1233		928
		Total number of genes:	10867		10867		10867		10867		10867		10867
		p value for the upregulated genes:	0.891		0.4381		0.2583		1		0.01375		0.02682
		p value for the downregulated genes:	0.8343		1		1		1		1		1
Gene ID	Cluster	Key Gene			log2FC values						log2FC values
			Carbon starved cultures		Lactose containing cultures		Arabinogalactan containing cultures		Lactose containing cultures		Lactose containing cultures		Arabinogalactan containing cultures
			vs.		vs.		vs.		vs.		vs.		vs.
			Glucose containing cultures		Glucose containing cultures		Glucose containing cultures		Arabinogalactan containing cultures		Carbon starved cultures		Carbon starved cultures
AN11232	AN4827 cluster		-0.225920158		0.106403075		0.182169806		-0.075766731		0.332323233		0.408089964
AN4823	AN4827 cluster		1.850261599		-0.150520218		0.728939355		-0.879459573		-2.000781817		-1.121322243
AN4824	AN4827 cluster		0.555023672		-0.35843506		-0.245757981		-0.112677079		-0.913458732		-0.800781653
AN4825	AN4827 cluster		9.336939313		2.2322287		8.12401178		-5.89178308		-7.104710613		-1.212927533
AN4826	AN4827 cluster		6.460736765		1.05254159		5.371869582		-4.319327992		-5.408195175		-1.088867183
AN4827	AN4827 cluster	NRPS	1.730206359		0.781518209		1.863233185		-1.081714977		-0.94868815		0.133026827
AN9445	AN4827 cluster		2.408196928		1.13563254		1.832829113		-0.697196573		-1.272564388		-0.575367815
AN9446	AN4827 cluster		0.334201657		0.225373917		0.504009223		-0.278635306		-0.10882774		0.169807566
		Number of upregulated genes in the group:	5		3		4		0		0		0
		Number of downregulated genes in the group:	0		0		0		3		4		3
		Number of genes in the group:	8		8		8		8		8		8
		Total number of upregulated genes:	2371		1749		2159		1098		1253		836
		Total number of downregulated genes:	1967		1276		1705		1068		1233		928
		Total number of genes:	10867		10867		10867		10867		10867		10867
		p value for the upregulated genes:	0.0152		0.1242		0.05501		1		1		1
		p value for the downregulated genes:	1		1		1		0.03635		0.007923		0.02508
Gene ID	Cluster	Key Gene			log2FC values						log2FC values
			Carbon starved cultures		Lactose containing cultures		Arabinogalactan containing cultures		Lactose containing cultures		Lactose containing cultures		Arabinogalactan containing cultures
			vs.		vs.		vs.		vs.		vs.		vs.
			Glucose containing cultures		Glucose containing cultures		Glucose containing cultures		Arabinogalactan containing cultures		Carbon starved cultures		Carbon starved cultures
AN5314	AN5318 cluster		-1.421449987		0.944860006		-1.137909037		2.082769044		2.366309993		0.28354095
AN5315	AN5318 cluster		2.938696626		4.073116493		3.831145924		0.241970568		1.134419866		0.892449298
AN5316	AN5318 cluster		1.202380881		-1.367142503		-1.055814171		-0.311328332		-2.569523384		-2.258195052
AN5317	AN5318 cluster		2.20750698		0.88013197		1.346708802		-0.466576832		-1.32737501		-0.860798178
AN5318	AN5318 cluster	NRPS	-1.047393488		-1.225941938		-1.600900145		0.374958207		-0.17854845		-0.553506657
		Number of upregulated genes in the group:	2		1		2		1		2		0
		Number of downregulated genes in the group:	2		1		2		0		1		0
		Number of genes in the group:	5		5		5		5		5		5
		Total number of upregulated genes:	2371		1749		2159		1098		1253		836
		Total number of downregulated genes:	1967		1276		1705		1068		1233		928
		Total number of genes:	10867		10867		10867		10867		10867		10867
		p value for the upregulated genes:	0.3003		0.5842		0.26		0.413		0.1048		1
		p value for the downregulated genes:	0.2243		0.4646		0.1776		1		0.4524		1
Gene ID	Cluster	Key Gene			log2FC values						log2FC values
			Carbon starved cultures		Lactose containing cultures		Arabinogalactan containing cultures		Lactose containing cultures		Lactose containing cultures		Arabinogalactan containing cultures
			vs.		vs.		vs.		vs.		vs.		vs.
			Glucose containing cultures		Glucose containing cultures		Glucose containing cultures		Arabinogalactan containing cultures		Carbon starved cultures		Carbon starved cultures
AN10720	AN5610 cluster		0.836728254		0.781865466		0.976942118		-0.195076652		-0.054862788		0.140213863
AN5608	AN5610 cluster		-0.260681854		0.404607937		0.470537839		-0.065929902		0.665289792		0.731219694
AN5609	AN5610 cluster	TF	0.086942636		0.600258729		0.60251196		-0.002253231		0.513316093		0.515569323
AN5610	AN5610 cluster	L-aminoadipate-semialdehyde-dehidrogenase	-1.690430429		-0.633566075		-0.784363398		0.150797324		1.056864354		0.906067031
AN9473	AN5610 cluster		-0.556428071		0.672245136		0.076396803		0.595848333		1.228673207		0.632824874
AN9474	AN5610 cluster		-0.531915298		0.66797906		0.881867885		-0.213888826		1.199894358		1.413783184
		Number of upregulated genes in the group:	0		0		0		0		3		1
		Number of downregulated genes in the group:	1		0		0		0		0		0
		Number of genes in the group:	6		6		6		6		6		6
		Total number of upregulated genes:	2371		1749		2159		1098		1253		836
		Total number of downregulated genes:	1967		1276		1705		1068		1233		928
		Total number of genes:	10867		10867		10867		10867		10867		10867
		p value for the upregulated genes:	1		1		1		1		0.02338		0.3815
		p value for the downregulated genes:	0.6983		1		1		1		1		1
Gene ID	Cluster	Key Gene			log2FC values						log2FC values
			Carbon starved cultures		Lactose containing cultures		Arabinogalactan containing cultures		Lactose containing cultures		Lactose containing cultures		Arabinogalactan containing cultures
			vs.		vs.		vs.		vs.		vs.		vs.
			Glucose containing cultures		Glucose containing cultures		Glucose containing cultures		Arabinogalactan containing cultures		Carbon starved cultures		Carbon starved cultures
AN6234	AN6236 cluster		0.239010745		-0.281860349		0.535942432		-0.817802781		-0.520871094		0.296931687
AN6235	AN6236 cluster		0.243520411		-0.695469192		0.125998161		-0.821467353		-0.938989602		-0.11752225
AN6236	AN6236 cluster	NRPS	-1.028688235		-0.761319314		-0.218023253		-0.543296061		0.267368921		0.810664982
		Number of upregulated genes in the group:	0		0		0		0		0		0
		Number of downregulated genes in the group:	1		0		0		0		0		0
		Number of genes in the group:	3		3		3		3		3		3
		Total number of upregulated genes:	2371		1749		2159		1098		1253		836
		Total number of downregulated genes:	1967		1276		1705		1068		1233		928
		Total number of genes:	10867		10867		10867		10867		10867		10867
		p value for the upregulated genes:	1		1		1		1		1		1
		p value for the downregulated genes:	0.4507		1		1		1		1		1
Gene ID	Cluster	Key Gene			log2FC values						log2FC values
			Carbon starved cultures		Lactose containing cultures		Arabinogalactan containing cultures		Lactose containing cultures		Lactose containing cultures		Arabinogalactan containing cultures
			vs.		vs.		vs.		vs.		vs.		vs.
			Glucose containing cultures		Glucose containing cultures		Glucose containing cultures		Arabinogalactan containing cultures		Carbon starved cultures		Carbon starved cultures
AN10816	AN6431 cluster		-1.348264718		-0.563685091		-1.644700749		1.081015659		0.784579627		-0.296436032
AN6431	AN6431 cluster	PKS	2.852009551		1.496479469		-1.295655627		2.792135096		-1.355530081		-4.147665177
AN6432	AN6431 cluster		2.665619939		1.715411458		-0.452563888		2.167975346		-0.950208481		-3.118183827
AN6433	AN6431 cluster		-0.521352269		-0.136243278		-0.831028752		0.694785474		0.385108991		-0.309676482
AN6434	AN6431 cluster		-0.053973623		-0.093598854		-0.639436266		0.545837412		-0.039625231		-0.585462643
AN6435	AN6431 cluster		0		1.499132533		0.827420997		0.671711536		1.871826795		1.200115259
AN6436	AN6431 cluster		0.078565315		-0.247053778		-0.657001639		0.409947861		-0.325619093		-0.735566953
AN6437	AN6431 cluster		-0.285421063		-1.461952462		-0.72038024		-0.741572222		-1.176531399		-0.434959177
		Number of upregulated genes in the group:	2		2		0		3		0		0
		Number of downregulated genes in the group:	1		1		2		0		2		2
		Number of genes in the group:	8		8		8		8		8		8
		Total number of upregulated genes:	2371		1749		2159		1098		1253		836
		Total number of downregulated genes:	1967		1276		1705		1068		1233		928
		Total number of genes:	10867		10867		10867		10867		10867		10867
		p value for the upregulated genes:	0.5488		0.3774		1		0.03907		1		1
		p value for the downregulated genes:	0.7977		0.632		0.3646		1		0.2277		0.1446
Gene ID	Cluster	Key Gene			log2FC values						log2FC values
			Carbon starved cultures		Lactose containing cultures		Arabinogalactan containing cultures		Lactose containing cultures		Lactose containing cultures		Arabinogalactan containing cultures
			vs.		vs.		vs.		vs.		vs.		vs.
			Glucose containing cultures		Glucose containing cultures		Glucose containing cultures		Arabinogalactan containing cultures		Carbon starved cultures		Carbon starved cultures
AN10886	AN7084 cluster		0.527437299		0.120534223		-1.908657216		2.029191439		-0.406903076		-2.436094516
AN10887	AN7084 cluster		3.051288959		2.351637081		-0.281131796		2.632768877		-0.699651878		-3.332420755
AN12290	AN7084 cluster		1.248339916		0.763465552		0.134780102		0.62868545		-0.484874364		-1.113559814
AN12291	AN7084 cluster		2.377810637		2.918249989		1.21133129		1.706918699		0.540439352		-1.166479347
AN7080	AN7084 cluster		0.89740798		-0.454983495		-0.121761845		-0.33322165		-1.352391475		-1.019169825
AN7081	AN7084 cluster		-1.780893898		-1.091764968		-3.777870889		2.686105921		0.689128931		-1.996976991
AN7083	AN7084 cluster		4.57574614		4.100769792		1.62999808		2.470771713		-0.474976348		-2.945748061
AN7084	AN7084 cluster	PKS	0.853072099		-0.174227472		-1.428369464		1.254141993		-1.027299571		-2.281441563
AN7086	AN7084 cluster		0.561278007		0.215935091		-0.073585063		0.289520153		-0.345342916		-0.63486307
		Number of upregulated genes in the group:	4		3		2		6		0		0
		Number of downregulated genes in the group:	1		1		3		0		2		8
		Number of genes in the group:	9		9		9		9		9		9
		Total number of upregulated genes:	2371		1749		2159		1098		1253		836
		Total number of downregulated genes:	1967		1276		1705		1068		1233		928
		Total number of genes:	10867		10867		10867		10867		10867		10867
		p value for the upregulated genes:	0.1115		0.165		0.5599		6.741e-05		1		1
		p value for the downregulated genes:	0.8343		0.6752		0.1558		1		0.2721		2.289e-08
Gene ID	Cluster	Key Gene			log2FC values						log2FC values
			Carbon starved cultures		Lactose containing cultures		Arabinogalactan containing cultures		Lactose containing cultures		Lactose containing cultures		Arabinogalactan containing cultures
			vs.		vs.		vs.		vs.		vs.		vs.
			Glucose containing cultures		Glucose containing cultures		Glucose containing cultures		Arabinogalactan containing cultures		Carbon starved cultures		Carbon starved cultures
AN7485	AN7489 (mirC) cluster		0.423378035		0.667076209		0.443783399		0.22329281		0.243698174		0.020405364
AN7487	AN7489 (mirC) cluster		0.855742895		0.265849617		0.399949522		-0.134099904		-0.589893278		-0.455793374
AN7488	AN7489 (mirC) cluster		0.688051738		0.547178955		0.950329421		-0.403150466		-0.140872783		0.262277683
AN7489	AN7489 (mirC) cluster	mitochondrial 3-oxoacyl-[acylcarrier-protein]-synthase	0.085534324		0.336016107		0.37311517		-0.037099063		0.250481783		0.287580846
AN7490	AN7489 (mirC) cluster		1.093826179		0.448189935		0.621756524		-0.173566589		-0.645636244		-0.472069655
AN7491	AN7489 (mirC) cluster		-0.323683334		0.177858365		0.273918092		-0.096059728		0.501541699		0.597601426
AN7492	AN7489 (mirC) cluster		-0.08702546		-0.220883797		0.112739531		-0.333623329		-0.133858337		0.199764991
AN7493	AN7489 (mirC) cluster		-0.23366592		0.108576435		0.221932276		-0.113355841		0.342242355		0.455598196
		Number of upregulated genes in the group:	1		0		0		0		0		0
		Number of downregulated genes in the group:	0		0		0		0		0		0
		Number of genes in the group:	8		8		8		8		8		8
		Total number of upregulated genes:	2371		1749		2159		1098		1253		836
		Total number of downregulated genes:	1967		1276		1705		1068		1233		928
		Total number of genes:	10867		10867		10867		10867		10867		10867
		p value for the upregulated genes:	0.8605		1		1		1		1		1
		p value for the downregulated genes:	1		1		1		1		1		1
Gene ID	Cluster	Key Gene			log2FC values						log2FC values
			Carbon starved cultures		Lactose containing cultures		Arabinogalactan containing cultures		Lactose containing cultures		Lactose containing cultures		Arabinogalactan containing cultures
			vs.		vs.		vs.		vs.		vs.		vs.
			Glucose containing cultures		Glucose containing cultures		Glucose containing cultures		Arabinogalactan containing cultures		Carbon starved cultures		Carbon starved cultures
AN11028	AN7884 cluster (aspercryptin)		0.047401896		-2.907093624		-1.011085056		-1.896008568		-2.95449552		-1.058486952
AN11031	AN7884 cluster (aspercryptin)		-0.201969159		-1.764077938		-1.829723256		0.065645318		-1.562108779		-1.627754097
AN7872	AN7884 cluster (aspercryptin)	TF	-0.788293682		-0.919238201		-1.45675881		0.537520609		-0.130944519		-0.668465128
AN7873	AN7884 cluster (aspercryptin)		-0.754012564		-1.123331936		-0.924356036		-0.198975901		-0.369319372		-0.170343471
AN7874	AN7884 cluster (aspercryptin)		-3.229230722		-2.495310603		-0.85404844		-1.641262163		0.733920118		2.375182282
AN7875	AN7884 cluster (aspercryptin)		-3.884146876		-1.709232472		0.176741901		-1.885974373		2.174914404		4.060888777
AN7876	AN7884 cluster (aspercryptin)		-1.253821427		-0.640764185		-0.670149952		0.029385767		0.613057242		0.583671475
AN7877	AN7884 cluster (aspercryptin)		-0.347611285		-0.117082941		-0.997255771		0.88017283		0.230528344		-0.649644486
AN7878	AN7884 cluster (aspercryptin)		-1.219796073		-1.131994333		-1.695002296		0.563007963		0.087801739		-0.475206223
AN7879	AN7884 cluster (aspercryptin)		-1.161817285		0.040040068		-1.295753524		1.335793592		1.201857353		-0.13393624
AN7880	AN7884 cluster (aspercryptin)		-0.977835032		0.645213506		0.590076071		0.055137435		1.623048538		1.567911103
AN7881	AN7884 cluster (aspercryptin)		-5.139494044		-2.594272236		-5.008161401		2.413889166		2.545221808		0.131332642
AN7883	AN7884 cluster (aspercryptin)		1.840775185		-0.157211479		-0.76033971		0.603128231		-1.997986664		-2.601114895
AN7884	AN7884 cluster (aspercryptin)	NRPS	-3.115591569		-1.982941575		-3.58830307		1.605361495		1.132649993		-0.472711501
		Number of upregulated genes in the group:	1		0		0		3		4		3
		Number of downregulated genes in the group:	7		7		5		3		2		1
		Number of genes in the group:	14		14		14		14		14		14
		Total number of upregulated genes:	2371		1749		2159		1098		1253		836
		Total number of downregulated genes:	1967		1276		1705		1068		1233		928
		Total number of genes:	10867		10867		10867		10867		10867		10867
		p value for the upregulated genes:	0.9682		1		1		0.1618		0.06848		0.08731
		p value for the downregulated genes:	0.006581		0.0004913		0.05517		0.1524		0.4829		0.7136
Gene ID	Cluster	Key Gene			log2FC values						log2FC values
			Carbon starved cultures		Lactose containing cultures		Arabinogalactan containing cultures		Lactose containing cultures		Lactose containing cultures		Arabinogalactan containing cultures
			vs.		vs.		vs.		vs.		vs.		vs.
			Glucose containing cultures		Glucose containing cultures		Glucose containing cultures		Arabinogalactan containing cultures		Carbon starved cultures		Carbon starved cultures
AN11037	AN8105 cluster		4.224592001		5.968826402		3.374354659		2.594471744		1.744234401		-0.850237343
AN11049	AN8105 cluster		3.152037448		5.094386018		3.746357673		1.348028346		1.942348571		0.594320225
AN11941	AN8105 cluster		7.965522041		8.002220962		7.313944795		0.688276168		0.036698921		-0.651577247
AN11942	AN8105 cluster		4.656343226		3.816858203		4.120418765		-0.303560562		-0.839485023		-0.535924461
AN8105	AN8105 cluster	NRPS	3.602056519		4.232467744		3.988598459		0.243869285		0.630411225		0.38654194
AN8106	AN8105 cluster		2.538768547		4.344738911		1.337526484		3.007212427		1.805970364		-1.201242063
AN8108	AN8105 cluster		1.81403528		1.295881899		3.359184187		-2.063302288		-0.518153381		1.545148906
AN8110	AN8105 cluster		1.948589238		2.140906113		2.375019188		-0.234113074		0.192316875		0.42642995
AN8111	AN8105 cluster	TF	0.943314425		1.114101912		1.966553926		-0.852452014		0.170787487		1.023239501
AN8112	AN8105 cluster		-4.220107061		-2.343026586		-2.621416271		0.278389684		1.877080475		1.598690791
		Number of upregulated genes in the group:	8		8		9		3		4		2
		Number of downregulated genes in the group:	1		1		1		1		0		1
		Number of genes in the group:	10		10		10		10		10		10
		Total number of upregulated genes:	2371		1749		2159		1098		1253		836
		Total number of downregulated genes:	1967		1276		1705		1068		1233		928
		Total number of genes:	10867		10867		10867		10867		10867		10867
		p value for the upregulated genes:	0.0001491		1.47e-05		3.911e-06		0.07191		0.02085		0.1766
		p value for the downregulated genes:	0.8644		0.7134		0.8187		0.6448		1		0.5906
Gene ID	Cluster	Key Gene			log2FC values						log2FC values
			Carbon starved cultures		Lactose containing cultures		Arabinogalactan containing cultures		Lactose containing cultures		Lactose containing cultures		Arabinogalactan containing cultures
			vs.		vs.		vs.		vs.		vs.		vs.
			Glucose containing cultures		Glucose containing cultures		Glucose containing cultures		Arabinogalactan containing cultures		Carbon starved cultures		Carbon starved cultures
AN12440	AN8142 cluster		-2.064248929		-0.360868689		-3.491800057		3.130931369		1.703380241		-1.427551128
AN8139	AN8142 cluster		1.436493308		7.205183471		2.543817524		4.661365948		5.768690163		1.107324215
AN8140	AN8142 cluster		1.32427656		5.374317949		3.782985204		1.591332745		4.050041389		2.458708644
AN8141	AN8142 cluster		2.830082833		8.239104314		1.737268026		6.501836288		5.40902148		-1.092814807
AN8142	AN8142 cluster	Prenyltransferase	0.589106763		4.302750135		2.313744192		1.989005943		3.713643372		1.724637429
AN8143	AN8142 cluster		3.529994598		2.57373765		4.512508199		-1.938770549		-0.956256948		0.9825136
AN8144	AN8142 cluster		0.395962976		0.647026807		2.828203588		-2.181176781		0.251063831		2.432240612
		Number of upregulated genes in the group:	3		5		4		4		5		2
		Number of downregulated genes in the group:	1		0		1		2		0		1
		Number of genes in the group:	7		7		7		7		7		7
		Total number of upregulated genes:	2371		1749		2159		1098		1253		836
		Total number of downregulated genes:	1967		1276		1705		1068		1233		928
		Total number of genes:	10867		10867		10867		10867		10867		10867
		p value for the upregulated genes:	0.1806		0.001695		0.03254		0.002824		0.0003476		0.09582
		p value for the downregulated genes:	0.753		1		0.6973		0.1454		1		0.4648
Gene ID	Cluster	Key Gene			log2FC values						log2FC values
			Carbon starved cultures		Lactose containing cultures		Arabinogalactan containing cultures		Lactose containing cultures		Lactose containing cultures		Arabinogalactan containing cultures
			vs.		vs.		vs.		vs.		vs.		vs.
			Glucose containing cultures		Glucose containing cultures		Glucose containing cultures		Arabinogalactan containing cultures		Carbon starved cultures		Carbon starved cultures
AN12403	AN8209 (wA) cluster		-1.056783428		-0.332529086		-0.492949253		0.160420167		0.724254342		0.563834175
AN12404	AN8209 (wA) cluster		-0.340013314		0.138726995		0.222182437		-0.083455442		0.478740309		0.562195751
AN8208	AN8209 (wA) cluster		0.468607739		0.379265522		0.607185856		-0.227920335		-0.089342217		0.138578118
AN8209	AN8209 (wA) cluster	PKS	0.994250786		0.278130298		0.370538269		-0.092407971		-0.716120488		-0.623712517
		Number of upregulated genes in the group:	0		0		0		0		0		0
		Number of downregulated genes in the group:	1		0		0		0		0		0
		Number of genes in the group:	4		4		4		4		4		4
		Total number of upregulated genes:	2371		1749		2159		1098		1253		836
		Total number of downregulated genes:	1967		1276		1705		1068		1233		928
		Total number of genes:	10867		10867		10867		10867		10867		10867
		p value for the upregulated genes:	1		1		1		1		1		1
		p value for the downregulated genes:	0.5501		1		1		1		1		1
Gene ID	Cluster	Key Gene			log2FC values						log2FC values
			Carbon starved cultures		Lactose containing cultures		Arabinogalactan containing cultures		Lactose containing cultures		Lactose containing cultures		Arabinogalactan containing cultures
			vs.		vs.		vs.		vs.		vs.		vs.
			Glucose containing cultures		Glucose containing cultures		Glucose containing cultures		Arabinogalactan containing cultures		Carbon starved cultures		Carbon starved cultures
AN8495	AN8504 cluster		-2.115778472		-1.919883664		-2.567139017		0.647255353		0.195894808		-0.451360546
AN8496	AN8504 cluster		2.623887945		2.725268021		2.868561546		-0.143293525		0.101380076		0.244673601
AN8497	AN8504 cluster		-0.681068387		-0.064006875		-0.32326945		0.259262576		0.617061512		0.357798936
AN8498	AN8504 cluster		1.21545438		0.224377998		0.863471267		-0.639093269		-0.991076382		-0.351983113
AN8499	AN8504 cluster		0.853366365		0.25894137		0.702293637		-0.443352267		-0.594424994		-0.151072727
AN8500	AN8504 cluster		0.666127281		0.992427132		0.576833857		0.415593275		0.326299851		-0.089293424
AN8501	AN8504 cluster		0.588867077		0.842665107		0.572459156		0.270205952		0.25379803		-0.016407922
AN8502	AN8504 cluster		5.156955102		4.391283733		5.326664594		-0.93538086		-0.765671369		0.169709491
AN8503	AN8504 cluster		1.293720247		2.544832451		1.110991073		1.433841377		1.251112203		-0.182729174
AN8504	AN8504 cluster	NRPS	-2.854329733		-2.947785159		-0.288210411		-2.659574748		-0.093455426		2.566119322
		Number of upregulated genes in the group:	4		3		3		1		1		1
		Number of downregulated genes in the group:	2		2		1		1		0		0
		Number of genes in the group:	10		10		10		10		10		10
		Total number of upregulated genes:	2371		1749		2159		1098		1253		836
		Total number of downregulated genes:	1967		1276		1705		1068		1233		928
		Total number of genes:	10867		10867		10867		10867		10867		10867
		p value for the upregulated genes:	0.1549		0.2089		0.3182		0.6555		0.7064		0.5511
		p value for the downregulated genes:	0.5643		0.3317		0.8187		0.6448		1		1
Gene ID	Cluster	Key Gene			log2FC values						log2FC values
			Carbon starved cultures		Lactose containing cultures		Arabinogalactan containing cultures		Lactose containing cultures		Lactose containing cultures		Arabinogalactan containing cultures
			vs.		vs.		vs.		vs.		vs.		vs.
			Glucose containing cultures		Glucose containing cultures		Glucose containing cultures		Arabinogalactan containing cultures		Carbon starved cultures		Carbon starved cultures
AN12240	AN8910 cluster		1.422348083		0.959575444		0.651700255		0.307875189		-0.46277264		-0.770647829
AN8905	AN8910 cluster		-2.137799911		-2.437805103		-2.732367182		0.294562079		-0.300005192		-0.594567271
AN8906	AN8910 cluster		-0.478752438		-1.68447871		-1.077566019		-0.606912691		-1.205726272		-0.59881358
AN8907	AN8910 cluster		-7.77522814		-2.752877116		-6.63919807		3.886320953		5.022351023		1.13603007
AN8908	AN8910 cluster		2.039916402		0.551850723		0.628678319		-0.076827596		-1.488065679		-1.411238083
AN8909	AN8910 cluster		1.550632833		0.607266771		2.158165788		-1.550899017		-0.943366062		0.607532954
AN8910	AN8910 cluster	PKS	-5.65919218		-6.694613157		-3.333042985		-3.361570172		-1.035420977		2.326149195
		Number of upregulated genes in the group:	2		0		0		1		0		2
		Number of downregulated genes in the group:	3		4		4		1		3		1
		Number of genes in the group:	7		7		7		7		7		7
		Total number of upregulated genes:	2371		1749		2159		1098		1253		836
		Total number of downregulated genes:	1967		1276		1705		1068		1233		928
		Total number of genes:	10867		10867		10867		10867		10867		10867
		p value for the upregulated genes:	0.4727		0		0		0.5257		0		0.09582
		p value for the downregulated genes:	0.1169		0.004939		0.01419		0.5154		0.0359		0.4648
Gene ID	Cluster	Key Gene			log2FC values						log2FC values
			Carbon starved cultures		Lactose containing cultures		Arabinogalactan containing cultures		Lactose containing cultures		Lactose containing cultures		Arabinogalactan containing cultures
			vs.		vs.		vs.		vs.		vs.		vs.
			Glucose containing cultures		Glucose containing cultures		Glucose containing cultures		Arabinogalactan containing cultures		Carbon starved cultures		Carbon starved cultures
AN9002	AN9005 cluster		-4.167216809		-1.662498128		-3.077690663		1.415192536		2.504718681		1.089526145
AN9003	AN9005 cluster		-1.315321769		-0.02190526		-1.263510671		1.241605411		1.293416509		0.051811098
AN9004	AN9005 cluster		-5.398115019		-3.126251972		-5.59279887		2.466546898		2.271863047		-0.194683851
AN9005	AN9005 cluster	PKS	4.083525223		3.760033641		2.791242655		0.968790986		-0.323491581		-1.292282567
AN9006	AN9005 cluster		5.886182974		4.109121656		3.609093413		0.500028242		-1.777061319		-2.277089561
AN9007	AN9005 cluster		1.918983592		-1.158686465		1.814298046		-2.972984511		-3.077670057		-0.104685545
		Number of upregulated genes in the group:	3		2		3		2		2		0
		Number of downregulated genes in the group:	3		2		3		1		2		2
		Number of genes in the group:	6		6		6		6		6		6
		Total number of upregulated genes:	2371		1749		2159		1098		1253		836
		Total number of downregulated genes:	1967		1276		1705		1068		1233		928
		Total number of genes:	10867		10867		10867		10867		10867		10867
		p value for the upregulated genes:	0.1224		0.2495		0.0972		0.1163		0.1455		1
		p value for the downregulated genes:	0.07689		0.15		0.0532		0.4625		0.1417		0.08672
Gene ID	Cluster	Key Gene			log2FC values						log2FC values
			Carbon starved cultures		Lactose containing cultures		Arabinogalactan containing cultures		Lactose containing cultures		Lactose containing cultures		Arabinogalactan containing cultures
			vs.		vs.		vs.		vs.		vs.		vs.
			Glucose containing cultures		Glucose containing cultures		Glucose containing cultures		Arabinogalactan containing cultures		Carbon starved cultures		Carbon starved cultures
AN9129	AN9129 cluster	NRPS	10.64536505		1.478446079		8.912136968		-7.433690889		-9.16691897		-1.73322808
AN9130	AN9129 cluster		2.6698309		3.133122165		4.180046687		-1.046924522		0.463291265		1.510215788
		Number of upregulated genes in the group:	2		2		2		0		0		1
		Number of downregulated genes in the group:	0		0		0		2		1		1
		Number of genes in the group:	2		2		2		2		2		2
		Total number of upregulated genes:	2371		1749		2159		1098		1253		836
		Total number of downregulated genes:	1967		1276		1705		1068		1233		928
		Total number of genes:	10867		10867		10867		10867		10867		10867
		p value for the upregulated genes:	0.04759		0.02589		0.03946		1		1		0.1479
		p value for the downregulated genes:	1		1		1		0.009651		0.2141		0.1635
Gene ID	Cluster	Key Gene			log2FC values						log2FC values
			Carbon starved cultures		Lactose containing cultures		Arabinogalactan containing cultures		Lactose containing cultures		Lactose containing cultures		Arabinogalactan containing cultures
			vs.		vs.		vs.		vs.		vs.		vs.
			Glucose containing cultures		Glucose containing cultures		Glucose containing cultures		Arabinogalactan containing cultures		Carbon starved cultures		Carbon starved cultures
AN11820	AN9291 (AN11820) cluster	NRPS	2.134721124		-0.225010218		0.216942496		-0.441952714		-2.359731342		-1.917778629
AN11821	AN9291 (AN11820) cluster		1.912461762		0.213636727		-0.153805599		0.367442326		-1.698825036		-2.066267361
AN9292	AN9291 (AN11820) cluster	TF	1.495407714		0.419624668		0.92047322		-0.500848553		-1.075783046		-0.574934493
AN9293	AN9291 (AN11820) cluster	TF	-0.656766576		0.035397259		-0.135909454		0.171306713		0.692163835		0.520857122
AN9294	AN9291 (AN11820) cluster		1.431538314		0.987700853		1.72872066		-0.741019806		-0.44383746		0.297182346
		Number of upregulated genes in the group:	4		0		1		0		0		0
		Number of downregulated genes in the group:	0		0		0		0		2		2
		Number of genes in the group:	5		5		5		5		5		5
		Total number of upregulated genes:	2371		1749		2159		1098		1253		836
		Total number of downregulated genes:	1967		1276		1705		1068		1233		928
		Total number of genes:	10867		10867		10867		10867		10867		10867
		p value for the upregulated genes:	0.009337		1		0.6697		1		1		1
		p value for the downregulated genes:	1		1		1		1		0.1019		0.06121
Gene ID	Cluster	Key Gene			log2FC values						log2FC values
			Carbon starved cultures		Lactose containing cultures		Arabinogalactan containing cultures		Lactose containing cultures		Lactose containing cultures		Arabinogalactan containing cultures
			vs.		vs.		vs.		vs.		vs.		vs.
			Glucose containing cultures		Glucose containing cultures		Glucose containing cultures		Arabinogalactan containing cultures		Carbon starved cultures		Carbon starved cultures
AN9313	AN9314 cluster		7.38815355		4.208562126		6.397130919		-2.188568793		-3.179591423		-0.99102263
AN9314	AN9314 cluster	Entkaurene synthase	4.726188356		1.917991843		3.640408293		-1.72241645		-2.808196513		-1.085780064
		Number of upregulated genes in the group:	2		2		2		0		0		0
		Number of downregulated genes in the group:	0		0		0		2		2		1
		Number of genes in the group:	2		2		2		2		2		2
		Total number of upregulated genes:	2371		1749		2159		1098		1253		836
		Total number of downregulated genes:	1967		1276		1705		1068		1233		928
		Total number of genes:	10867		10867		10867		10867		10867		10867
		p value for the upregulated genes:	0.04759		0.02589		0.03946		1		1		1
		p value for the downregulated genes:	1		1		1		0.009651		0.01286		0.1635
Gene ID	Cluster	Key Gene			log2FC values						log2FC values
			Carbon starved cultures		Lactose containing cultures		Arabinogalactan containing cultures		Lactose containing cultures		Lactose containing cultures		Arabinogalactan containing cultures
			vs.		vs.		vs.		vs.		vs.		vs.
			Glucose containing cultures		Glucose containing cultures		Glucose containing cultures		Arabinogalactan containing cultures		Carbon starved cultures		Carbon starved cultures
AN1029	Asperfuranone (afo) cluster	TF	0.791647429		0.655555927		1.651157747		-0.99560182		-0.136091502		0.859510319
AN1030	Asperfuranone (afo) cluster		1.83501475		3.627591773		1.386790608		2.240801165		1.792577023		-0.448224142
AN1031	Asperfuranone (afo) cluster		-1.090887864		1.477622809		0.911185059		0.56643775		2.568510673		2.002072923
AN1032	Asperfuranone (afo) cluster		-0.353888447		0.556419893		-0.749766907		1.306186801		0.910308341		-0.39587846
AN1033	Asperfuranone (afo) cluster		-0.697481616		0.168932126		-0.674870823		0.843802949		0.866413742		0.022610793
AN1034	Asperfuranone (afo) cluster	PKS	-6.769509118		-1.161913465		-3.302659825		2.14074636		5.607595653		3.466849293
AN1035	Asperfuranone (afo) cluster		0.889208322		4.103028519		-0.576557404		4.679585924		3.213820198		-1.465765726
AN1036	Asperfuranone (afo) cluster	PKS	3.047171814		3.073162173		1.489959168		1.583203005		0.025990359		-1.557212646
AN11287	Asperfuranone (afo) cluster		0		1.512759561		0		1.647134796		1.885458364		0
		Number of upregulated genes in the group:	1		3		1		4		3		1
		Number of downregulated genes in the group:	1		1		1		0		0		1
		Number of genes in the group:	9		9		9		9		9		9
		Total number of upregulated genes:	2371		1749		2159		1098		1253		836
		Total number of downregulated genes:	1967		1276		1705		1068		1233		928
		Total number of genes:	10867		10867		10867		10867		10867		10867
		p value for the upregulated genes:	0.891		0.165		0.8639		0.008614		0.07545		0.5136
		p value for the downregulated genes:	0.8343		0.6752		0.7849		1		1		0.5523
Gene ID	Cluster	Key Gene			log2FC values						log2FC values
			Carbon starved cultures		Lactose containing cultures		Arabinogalactan containing cultures		Lactose containing cultures		Lactose containing cultures		Arabinogalactan containing cultures
			vs.		vs.		vs.		vs.		vs.		vs.
			Glucose containing cultures		Glucose containing cultures		Glucose containing cultures		Arabinogalactan containing cultures		Carbon starved cultures		Carbon starved cultures
AN6000	Asperthecin (apt) cluster	PKS	1.850119908		1.075154746		1.509239857		-0.434085111		-0.774965162		-0.340880051
AN6001	Asperthecin (apt) cluster		2.735879419		1.194487788		1.858513634		-0.664025846		-1.541391631		-0.877365785
AN6002	Asperthecin (apt) cluster		0.082012615		0.607782998		0.95321893		-0.345435932		0.525770383		0.871206315
		Number of upregulated genes in the group:	2		2		2		0		0		0
		Number of downregulated genes in the group:	0		0		0		0		1		0
		Number of genes in the group:	3		3		3		3		3		3
		Total number of upregulated genes:	2371		1749		2159		1098		1253		836
		Total number of downregulated genes:	1967		1276		1705		1068		1233		928
		Total number of genes:	10867		10867		10867		10867		10867		10867
		p value for the upregulated genes:	0.122		0.06935		0.1027		1		1		1
		p value for the downregulated genes:	1		1		1		1		0.3033		1
Gene ID	Cluster	Key Gene			log2FC values						log2FC values
			Carbon starved cultures		Lactose containing cultures		Arabinogalactan containing cultures		Lactose containing cultures		Lactose containing cultures		Arabinogalactan containing cultures
			vs.		vs.		vs.		vs.		vs.		vs.
			Glucose containing cultures		Glucose containing cultures		Glucose containing cultures		Arabinogalactan containing cultures		Carbon starved cultures		Carbon starved cultures
AN11872	Aspyridone (asp) cluster		-5.107471992		-3.356146289		-5.361217627		2.005071338		1.751325703		-0.253745634
AN8408	Aspyridone (asp) cluster		0.990323483		1.667004096		0.246837936		1.42016616		0.676680613		-0.743485547
AN8409	Aspyridone (asp) cluster		0.589088987		0		1.572322581		-1.926855912		-0.943622317		0.983233595
AN8410	Aspyridone (asp) cluster		-1.396080132		-3.212189184		-0.249464227		-2.962724958		-1.816109052		1.146615906
AN8411	Aspyridone (asp) cluster		-7.456353226		-4.255536391		-5.38949743		1.133961039		3.200816835		2.066855796
AN8412	Aspyridone (asp) cluster	PKS-NRPS	-1.961593126		-4.175291372		-4.32491975		0.149628378		-2.213698247		-2.363326625
AN8413	Aspyridone (asp) cluster		3.761895896		0.233020905		1.398623179		-1.165602274		-3.528874991		-2.363272716
AN8414	Aspyridone (asp) cluster	TF	-1.301200211		-1.43422438		-1.05677091		-0.37745347		-0.133024168		0.244429302
AN8415	Aspyridone (asp) cluster		2.653033177		2.595045623		3.08664436		-0.491598737		-0.057987554		0.433611183
		Number of upregulated genes in the group:	2		1		2		1		2		0
		Number of downregulated genes in the group:	4		4		4		1		2		2
		Number of genes in the group:	9		9		9		9		9		9
		Total number of upregulated genes:	2371		1749		2159		1098		1253		836
		Total number of downregulated genes:	1967		1276		1705		1068		1233		928
		Total number of genes:	10867		10867		10867		10867		10867		10867
		p value for the upregulated genes:	0.6169		0.794		0.5599		0.6167		0.2785		1
		p value for the downregulated genes:	0.06256		0.01465		0.03933		0.606		0.2721		0.1758
Gene ID	Cluster	Key Gene			log2FC values						log2FC values
			Carbon starved cultures		Lactose containing cultures		Arabinogalactan containing cultures		Lactose containing cultures		Lactose containing cultures		Arabinogalactan containing cultures
			vs.		vs.		vs.		vs.		vs.		vs.
			Glucose containing cultures		Glucose containing cultures		Glucose containing cultures		Arabinogalactan containing cultures		Carbon starved cultures		Carbon starved cultures
AN9244	Austinol (aus) cluster 1	NRPS	2.083818789		0.645480712		-0.063178239		0.708658951		-1.438338077		-2.146997028
AN9245	Austinol (aus) cluster 1		7.217238526		4.347723054		3.456774333		0.890948721		-2.869515472		-3.760464192
AN9246	Austinol (aus) cluster 1		6.955285127		5.374201646		5.891809616		-0.51760797		-1.581083481		-1.063475511
AN9247	Austinol (aus) cluster 1		5.817544796		2.858879489		3.342966661		-0.484087173		-2.958665308		-2.474578135
AN9248	Austinol (aus) cluster 1		2.37773813		0.096666395		2.242379768		-2.145713373		-2.281071735		-0.135358362
AN9249	Austinol (aus) cluster 1		2.236523734		-0.248699032		2.455605135		-2.704304167		-2.485222765		0.219081401
AN9250	Austinol (aus) cluster 1		-0.460118006		0.373034438		-0.647916787		1.020951225		0.833152444		-0.187798781
AN9251	Austinol (aus) cluster 1		-1.5555865		-1.156950792		-0.952347099		-0.204603693		0.398635709		0.603239402
AN9252	Austinol (aus) cluster 1		-0.643246239		0.070595399		-1.699860816		1.770456215		0.713841639		-1.056614576
AN9253	Austinol (aus) cluster 1		5.690908981		3.82456053		8.157263035		-4.332702505		-1.866348451		2.466354054
		Number of upregulated genes in the group:	7		4		6		0		0		1
		Number of downregulated genes in the group:	0		0		0		3		7		4
		Number of genes in the group:	10		10		10		10		10		10
		Total number of upregulated genes:	2371		1749		2159		1098		1253		836
		Total number of downregulated genes:	1967		1276		1705		1068		1233		928
		Total number of genes:	10867		10867		10867		10867		10867		10867
		p value for the upregulated genes:	0.001492		0.06242		0.00613		1		1		0.5511
		p value for the downregulated genes:	1		1		1		0.06717		2.096e-05		0.007298
Gene ID	Cluster	Key Gene			log2FC values						log2FC values
			Carbon starved cultures		Lactose containing cultures		Arabinogalactan containing cultures		Lactose containing cultures		Lactose containing cultures		Arabinogalactan containing cultures
			vs.		vs.		vs.		vs.		vs.		vs.
			Glucose containing cultures		Glucose containing cultures		Glucose containing cultures		Arabinogalactan containing cultures		Carbon starved cultures		Carbon starved cultures
AN11871	Austinol (aus) cluster 2		2.341952314		-0.354510319		-0.134351816		-0.220158502		-2.696462633		-2.476304131
AN8379	Austinol (aus) cluster 2		-0.935211357		1.580817571		-0.424602451		2.005420022		2.516028929		0.510608907
AN8381	Austinol (aus) cluster 2		2.343149468		0.239769987		3.134327517		-2.89455753		-2.103379481		0.791178049
AN8383	Austinol (aus) cluster 2	PKS	5.702929558		2.970062878		3.452611917		-0.482549039		-2.732866679		-2.250317641
AN8384	Austinol (aus) cluster 2		0.611924959		1.975334995		2.411721954		-0.436386959		1.363410036		1.799796995
		Number of upregulated genes in the group:	1		1		2		0		1		0
		Number of downregulated genes in the group:	0		0		0		1		1		1
		Number of genes in the group:	5		5		5		5		5		5
		Total number of upregulated genes:	2371		1749		2159		1098		1253		836
		Total number of downregulated genes:	1967		1276		1705		1068		1233		928
		Total number of genes:	10867		10867		10867		10867		10867		10867
		p value for the upregulated genes:	0.708		0.5842		0.26		1		0.4581		1
		p value for the downregulated genes:	1		1		1		0.4039		0.4524		0.3601
Gene ID	Cluster	Key Gene			log2FC values						log2FC values
			Carbon starved cultures		Lactose containing cultures		Arabinogalactan containing cultures		Lactose containing cultures		Lactose containing cultures		Arabinogalactan containing cultures
			vs.		vs.		vs.		vs.		vs.		vs.
			Glucose containing cultures		Glucose containing cultures		Glucose containing cultures		Arabinogalactan containing cultures		Carbon starved cultures		Carbon starved cultures
AN11584	Derivative of Benzaldehyde1 (dba) and F9775 hybrid cluster 1		0.58910686		5.358978551		2.656111176		2.702867374		4.76987169		2.067004316
AN7896	Derivative of Benzaldehyde1 (dba) and F9775 hybrid cluster 1	TF	-4.408256305		1.203365546		-3.301034069		4.504399615		5.611621851		1.107222237
AN7897	Derivative of Benzaldehyde1 (dba) and F9775 hybrid cluster 1		-2.862897791		2.334672712		-1.12887465		3.463547362		5.197570503		1.734023141
AN7898	Derivative of Benzaldehyde1 (dba) and F9775 hybrid cluster 1		-0.80947452		-0.102606357		-0.238391729		0.135785372		0.706868163		0.571082791
AN7899	Derivative of Benzaldehyde1 (dba) and F9775 hybrid cluster 1		-2.2513305		-1.645370356		-2.148556865		0.503186509		0.605960144		0.102773635
AN7900	Derivative of Benzaldehyde1 (dba) and F9775 hybrid cluster 1		-1.903642509		0.771946294		-0.787602113		1.559548407		2.675588802		1.116040395
AN7901	Derivative of Benzaldehyde1 (dba) and F9775 hybrid cluster 1	TF	-0.034454379		0.381098864		-1.214633428		1.595732291		0.415553243		-1.180179049
AN7902	Derivative of Benzaldehyde1 (dba) and F9775 hybrid cluster 1		-1.397412307		1.030709275		-1.223184245		2.253893519		2.428121582		0.174228062
AN7903	Derivative of Benzaldehyde1 (dba) and F9775 hybrid cluster 1	PKS	-1.852348735		2.762960601		0.647610042		2.115350558		4.615309336		2.499958777
		Number of upregulated genes in the group:	0		4		0		6		5		1
		Number of downregulated genes in the group:	3		1		3		0		0		1
		Number of genes in the group:	9		9		9		9		9		9
		Total number of upregulated genes:	2371		1749		2159		1098		1253		836
		Total number of downregulated genes:	1967		1276		1705		1068		1233		928
		Total number of genes:	10867		10867		10867		10867		10867		10867
		p value for the upregulated genes:	1		0.04277		1		6.741e-05		0.001708		0.5136
		p value for the downregulated genes:	0.2129		0.6752		0.1558		1		1		0.5523
Gene ID	Cluster	Key Gene			log2FC values						log2FC values
			Carbon starved cultures		Lactose containing cultures		Arabinogalactan containing cultures		Lactose containing cultures		Lactose containing cultures		Arabinogalactan containing cultures
			vs.		vs.		vs.		vs.		vs.		vs.
			Glucose containing cultures		Glucose containing cultures		Glucose containing cultures		Arabinogalactan containing cultures		Carbon starved cultures		Carbon starved cultures
AN12004	Derivative of Benzaldehyde1 (dba) and F9775 hybrid cluster 2		0.97398204		3.287842154		0.158514983		3.129327172		2.313860115		-0.815467057
AN7907	Derivative of Benzaldehyde1 (dba) and F9775 hybrid cluster 2		5.112520798		2.453640144		5.146641423		-2.69300128		-2.658880654		0.034120625
AN7908	Derivative of Benzaldehyde1 (dba) and F9775 hybrid cluster 2		4.196909231		6.004893318		10.26190108		-4.25700776		1.807984087		6.064991847
AN7909	Derivative of Benzaldehyde1 (dba) and F9775 hybrid cluster 2	PKS	1.54575954		4.206740201		1.568808952		2.637931249		2.66098066		0.023049412
AN7911	Derivative of Benzaldehyde1 (dba) and F9775 hybrid cluster 2		0.426471463		3.182484529		0.342908921		2.839575608		2.756013066		-0.083562542
AN7912	Derivative of Benzaldehyde1 (dba) and F9775 hybrid cluster 2		0.374880006		4.410453797		-0.099949537		4.510403334		4.035573791		-0.474829543
AN7913	Derivative of Benzaldehyde1 (dba) and F9775 hybrid cluster 2		-0.542336263		0.938690799		-0.401142056		1.339832855		1.481027062		0.141194207
AN7914	Derivative of Benzaldehyde1 (dba) and F9775 hybrid cluster 2		-1.894086976		3.169395787		-0.324826102		3.494221889		5.063482763		1.569260874
AN7915	Derivative of Benzaldehyde1 (dba) and F9775 hybrid cluster 2		-6.469662937		-2.504031084		-3.406186123		0.902155039		3.965631853		3.063476814
AN7916	Derivative of Benzaldehyde1 (dba) and F9775 hybrid cluster 2		-1.617449901		-1.865151455		-3.471326947		1.606175492		-0.247701555		-1.853877046
		Number of upregulated genes in the group:	3		7		3		6		8		3
		Number of downregulated genes in the group:	3		2		2		2		1		0
		Number of genes in the group:	10		10		10		10		10		10
		Total number of upregulated genes:	2371		1749		2159		1098		1253		836
		Total number of downregulated genes:	1967		1276		1705		1068		1233		928
		Total number of genes:	10867		10867		10867		10867		10867		10867
		p value for the upregulated genes:	0.3776		0.0002114		0.3182		0.0001541		1.112e-06		0.03616
		p value for the downregulated genes:	0.2657		0.3317		0.4809		0.2572		0.7003		1
Gene ID	Cluster	Key Gene			log2FC values						log2FC values
			Carbon starved cultures		Lactose containing cultures		Arabinogalactan containing cultures		Lactose containing cultures		Lactose containing cultures		Arabinogalactan containing cultures
			vs.		vs.		vs.		vs.		vs.		vs.
			Glucose containing cultures		Glucose containing cultures		Glucose containing cultures		Arabinogalactan containing cultures		Carbon starved cultures		Carbon starved cultures
AN2545	Emericellamide (eas) cluster	NRPS	1.926491879		0.975254253		1.86665865		-0.891404398		-0.951237627		-0.059833229
AN2546	Emericellamide (eas) cluster		-0.450663284		0.445430108		1.302648264		-0.857218156		0.896093393		1.753311549
AN2547	Emericellamide (eas) cluster	PKS	0.031577249		0.502503624		2.562799999		-2.060296375		0.470926375		2.53122275
AN2548	Emericellamide (eas) cluster		-1.893611103		0.354996703		2.407154491		-2.052157788		2.248607806		4.300765594
AN2549	Emericellamide (eas) cluster		-0.84226558		0.450627718		2.133263284		-1.682635566		1.292893298		2.975528864
		Number of upregulated genes in the group:	1		0		5		0		2		4
		Number of downregulated genes in the group:	1		0		0		3		0		0
		Number of genes in the group:	5		5		5		5		5		5
		Total number of upregulated genes:	2371		1749		2159		1098		1253		836
		Total number of downregulated genes:	1967		1276		1705		1068		1233		928
		Total number of genes:	10867		10867		10867		10867		10867		10867
		p value for the upregulated genes:	0.708		1		0.0003084		1		0.1048		0.0001633
		p value for the downregulated genes:	0.6316		1		1		0.008131		1		1
Gene ID	Cluster	Key Gene			log2FC values						log2FC values
			Carbon starved cultures		Lactose containing cultures		Arabinogalactan containing cultures		Lactose containing cultures		Lactose containing cultures		Arabinogalactan containing cultures
			vs.		vs.		vs.		vs.		vs.		vs.
			Glucose containing cultures		Glucose containing cultures		Glucose containing cultures		Arabinogalactan containing cultures		Carbon starved cultures		Carbon starved cultures
AN3490	inp cluster		-0.439489054		1.694789449		0.263511704		1.431277745		2.134278503		0.703000758
AN3491	inp cluster		-1.027915329		1.369274566		0.254641679		1.114632886		2.397189895		1.282557008
AN3492	inp cluster	TF	-1.017978973		-0.320180486		-0.919841408		0.599660922		0.697798486		0.098137565
AN3493	inp cluster		0.993778791		1.442832697		0.065045888		1.377786809		0.449053906		-0.928732903
AN3494	inp cluster		-3.163690187		-3.145523402		-2.92536569		0		0		0
AN3495	inp cluster	NRPS	-2.654011648		-1.164227895		-2.203047949		1.038820054		1.489783753		0.450963699
AN3496	inp cluster	NRPS	-1.974845705		-1.036679344		-1.076682896		0.040003552		0.938166361		0.898162809
AN3497	inp cluster		-0.122041608		-0.08923107		-0.419381066		0.330149997		0.032810538		-0.297339459
		Number of upregulated genes in the group:	0		3		0		3		2		1
		Number of downregulated genes in the group:	4		1		2		0		0		0
		Number of genes in the group:	8		8		8		8		8		8
		Total number of upregulated genes:	2371		1749		2159		1098		1253		836
		Total number of downregulated genes:	1967		1276		1705		1068		1233		928
		Total number of genes:	10867		10867		10867		10867		10867		10867
		p value for the upregulated genes:	1		0.1242		0		0.03907		0.2334		0.473
		p value for the downregulated genes:	0.04043		0.632		0.3646		1		1		1
Gene ID	Cluster	Key Gene			log2FC values						log2FC values
			Carbon starved cultures		Lactose containing cultures		Arabinogalactan containing cultures		Lactose containing cultures		Lactose containing cultures		Arabinogalactan containing cultures
			vs.		vs.		vs.		vs.		vs.		vs.
			Glucose containing cultures		Glucose containing cultures		Glucose containing cultures		Arabinogalactan containing cultures		Carbon starved cultures		Carbon starved cultures
AN10573	ivo cluster		5.348837188		1.929295694		8.937936365		-7.008640671		-3.419541494		3.589099176
AN10576	ivo cluster	NRPS	1.109287654		1.995536546		5.154964444		-3.159427898		0.886248892		4.04567679
		Number of upregulated genes in the group:	2		2		2		0		0		2
		Number of downregulated genes in the group:	0		0		0		2		1		0
		Number of genes in the group:	2		2		2		2		2		2
		Total number of upregulated genes:	2371		1749		2159		1098		1253		836
		Total number of downregulated genes:	1967		1276		1705		1068		1233		928
		Total number of genes:	10867		10867		10867		10867		10867		10867
		p value for the upregulated genes:	0.04759		0.02589		0.03946		1		1		0.005912
		p value for the downregulated genes:	1		1		1		0.009651		0.2141		1
Gene ID	Cluster	Key Gene			log2FC values						log2FC values
			Carbon starved cultures		Lactose containing cultures		Arabinogalactan containing cultures		Lactose containing cultures		Lactose containing cultures		Arabinogalactan containing cultures
			vs.		vs.		vs.		vs.		vs.		vs.
			Glucose containing cultures		Glucose containing cultures		Glucose containing cultures		Arabinogalactan containing cultures		Carbon starved cultures		Carbon starved cultures
AN3394	Microperfuranone (mic) cluster		-2.762181832		-1.471348825		-2.528468553		1.057119728		1.290833007		0.233713279
AN3395	Microperfuranone (mic) cluster		-2.63008018		-0.672712305		-1.669518292		0.996805987		1.957367875		0.960561888
AN3396	Microperfuranone (mic) cluster	NRPS	-5.308362798		-1.882030928		-4.201760218		2.31972929		3.426331869		1.10660258
		Number of upregulated genes in the group:	0		0		0		2		3		1
		Number of downregulated genes in the group:	3		2		3		0		0		0
		Number of genes in the group:	3		3		3		3		3		3
		Total number of upregulated genes:	2371		1749		2159		1098		1253		836
		Total number of downregulated genes:	1967		1276		1705		1068		1233		928
		Total number of genes:	10867		10867		10867		10867		10867		10867
		p value for the upregulated genes:	1		1		1		0.02854		0.00153		0.2135
		p value for the downregulated genes:	0.005923		0.0381		0.003857		1		1		1
Gene ID	Cluster	Key Gene			log2FC values						log2FC values
			Carbon starved cultures		Lactose containing cultures		Arabinogalactan containing cultures		Lactose containing cultures		Lactose containing cultures		Arabinogalactan containing cultures
			vs.		vs.		vs.		vs.		vs.		vs.
			Glucose containing cultures		Glucose containing cultures		Glucose containing cultures		Arabinogalactan containing cultures		Carbon starved cultures		Carbon starved cultures
AN0146	Monodictyphenone (mdp) cluster		5.653583336		7.134076312		4.409878195		2.724198117		1.480492976		-1.243705141
AN0147	Monodictyphenone (mdp) cluster		3.08806182		7.855825047		1.856509582		5.999315465		4.767763227		-1.231552238
AN0148	Monodictyphenone (mdp) cluster	TF	3.178504838		2.925279038		1.540133252		1.385145785		-0.253225801		-1.638371586
AN0149	Monodictyphenone (mdp) cluster		1.766531651		3.998896831		1.787645539		2.211251291		2.23236518		0.021113889
AN0150	Monodictyphenone (mdp) cluster	PKS	2.282654857		3.04899613		1.69007627		1.35891986		0.766341273		-0.592578587
AN10021	Monodictyphenone (mdp) cluster	Transcription coactivator	3.446067721		3.781370212		2.778010067		1.003360145		0.335302491		-0.668057655
AN10022	Monodictyphenone (mdp) cluster		4.624255979		7.650907278		4.82485797		2.826049308		3.026651299		0.200601991
AN10023	Monodictyphenone (mdp) cluster		2.498870925		8.43803816		3.891979394		4.546058766		5.939167235		1.393108469
AN10035	Monodictyphenone (mdp) cluster		5.747803421		6.113416258		5.465020052		0.648396206		0.365612837		-0.282783369
AN10038	Monodictyphenone (mdp) cluster		0.210015725		8.486195863		4.132875208		4.353320655		8.276180138		3.922859483
AN10044	Monodictyphenone (mdp) cluster		4.011449254		8.907585864		4.217561061		4.690024803		4.89613661		0.206111806
AN10049	Monodictyphenone (mdp) cluster		3.774872942		6.509528412		3.092823475		3.416704937		2.73465547		-0.682049467
		Number of upregulated genes in the group:	11		12		12		11		8		2
		Number of downregulated genes in the group:	0		0		0		0		0		3
		Number of genes in the group:	12		12		12		12		12		12
		Total number of upregulated genes:	2371		1749		2159		1098		1253		836
		Total number of downregulated genes:	1967		1276		1705		1068		1233		928
		Total number of genes:	10867		10867		10867		10867		10867		10867
		p value for the upregulated genes:	5.033e-07		2.927e-10		3.69e-09		1.167e-10		9.872e-06		0.2346
		p value for the downregulated genes:	1		1		1		1		1		0.07629
Gene ID	Cluster	Key Gene			log2FC values						log2FC values
			Carbon starved cultures		Lactose containing cultures		Arabinogalactan containing cultures		Lactose containing cultures		Lactose containing cultures		Arabinogalactan containing cultures
			vs.		vs.		vs.		vs.		vs.		vs.
			Glucose containing cultures		Glucose containing cultures		Glucose containing cultures		Arabinogalactan containing cultures		Carbon starved cultures		Carbon starved cultures
AN11080	Nidulanin A (nptA) cluster	DMATS-type aromatic prenyltransferase	-1.861862462		0.695880894		-3.031602741		3.727483635		2.557743356		-1.169740279
AN11082	Nidulanin A (nptA) cluster		0.176624809		0.073909151		0.250924061		-0.17701491		-0.102715658		0.074299251
		Number of upregulated genes in the group:	0		0		0		1		1		0
		Number of downregulated genes in the group:	1		0		1		0		0		1
		Number of genes in the group:	2		2		2		2		2		2
		Total number of upregulated genes:	2371		1749		2159		1098		1253		836
		Total number of downregulated genes:	1967		1276		1705		1068		1233		928
		Total number of genes:	10867		10867		10867		10867		10867		10867
		p value for the upregulated genes:	1		1		1		0.1919		0.2173		1
		p value for the downregulated genes:	0.3293		1		0.2892		1		1		0.1635
Gene ID	Cluster	Key Gene			log2FC values						log2FC values
			Carbon starved cultures		Lactose containing cultures		Arabinogalactan containing cultures		Lactose containing cultures		Lactose containing cultures		Arabinogalactan containing cultures
			vs.		vs.		vs.		vs.		vs.		vs.
			Glucose containing cultures		Glucose containing cultures		Glucose containing cultures		Arabinogalactan containing cultures		Carbon starved cultures		Carbon starved cultures
AN11190	No PKS/NRPS backbone 1		-1.146030758		-0.000770757		-0.591263764		0.590493007		1.145260001		0.554766993
AN11195	No PKS/NRPS backbone 1	TF	-0.55157928		0.271339407		-0.279546142		0.550885549		0.822918687		0.272033138
AN9179	No PKS/NRPS backbone 1		-4.351383868		-0.293464366		-3.919149163		3.625684797		4.057919503		0.432234705
AN9180	No PKS/NRPS backbone 1		-3.849946683		0.372870222		-3.445899667		3.818769889		4.222816905		0.404047016
AN9181	No PKS/NRPS backbone 1		-1.419522746		1.541769129		-1.239365263		2.781134392		2.961291875		0.180157483
AN9183	No PKS/NRPS backbone 1		-3.213374034		-0.948619855		-0.317203254		-0.631416601		2.264754178		2.896170779
AN9184	No PKS/NRPS backbone 1		-0.477310474		-1.008084018		-3.997776289		2.989692271		-0.530773544		-3.520465814
AN9185	No PKS/NRPS backbone 1		-3.168450492		0.077398635		-4.055198133		4.132596769		3.245849128		-0.886747641
		Number of upregulated genes in the group:	0		1		0		5		6		1
		Number of downregulated genes in the group:	6		1		5		0		0		1
		Number of genes in the group:	8		8		8		8		8		8
		Total number of upregulated genes:	2371		1749		2159		1098		1253		836
		Total number of downregulated genes:	1967		1276		1705		1068		1233		928
		Total number of genes:	10867		10867		10867		10867		10867		10867
		p value for the upregulated genes:	1		0.7545		1		0.0004501		5.293e-05		0.473
		p value for the downregulated genes:	0.0006996		0.632		0.00349		1		1		0.5105
Gene ID	Cluster	Key Gene			log2FC values						log2FC values
			Carbon starved cultures		Lactose containing cultures		Arabinogalactan containing cultures		Lactose containing cultures		Lactose containing cultures		Arabinogalactan containing cultures
			vs.		vs.		vs.		vs.		vs.		vs.
			Glucose containing cultures		Glucose containing cultures		Glucose containing cultures		Arabinogalactan containing cultures		Carbon starved cultures		Carbon starved cultures
AN0653	No PKS/NRPS backbone 3	TF	-1.218155127		-0.646762793		-0.992140111		0.345377318		0.571392334		0.226015016
AN0654	No PKS/NRPS backbone 3		2.05078455		1.066572668		1.735636987		-0.669064318		-0.984211882		-0.315147563
AN0655	No PKS/NRPS backbone 3		-0.493337236		-0.399524429		-1.145279092		0.745754663		0.093812808		-0.651941856
AN0656	No PKS/NRPS backbone 3		-1.860636857		0.650275471		-2.057125842		2.707401314		2.510912328		-0.196488985
AN0657	No PKS/NRPS backbone 3		-1.562077726		-0.962437244		-1.099953283		0.137516038		0.599640482		0.462124444
AN0658	No PKS/NRPS backbone 3	TF	0.220146779		-0.059054525		-0.139222348		0.080167823		-0.279201304		-0.359369127
AN0659	No PKS/NRPS backbone 3		-1.021222855		-0.45051731		-0.366916333		-0.083600977		0.570705546		0.654306523
AN0660	No PKS/NRPS backbone 3		0.630230393		0.649386003		-0.191767846		0.841153849		0.01915561		-0.821998239
AN11278	No PKS/NRPS backbone 3		-1.565626225		-1.088611767		-1.180406576		0.091794809		0.477014458		0.385219649
		Number of upregulated genes in the group:	1		1		1		1		1		0
		Number of downregulated genes in the group:	5		1		4		0		0		0
		Number of genes in the group:	9		9		9		9		9		9
		Total number of upregulated genes:	2371		1749		2159		1098		1253		836
		Total number of downregulated genes:	1967		1276		1705		1068		1233		928
		Total number of genes:	10867		10867		10867		10867		10867		10867
		p value for the upregulated genes:	0.891		0.794		0.8639		0.6167		0.6681		1
		p value for the downregulated genes:	0.01276		0.6752		0.03933		1		1		1
Gene ID	Cluster	Key Gene			log2FC values						log2FC values
			Carbon starved cultures		Lactose containing cultures		Arabinogalactan containing cultures		Lactose containing cultures		Lactose containing cultures		Arabinogalactan containing cultures
			vs.		vs.		vs.		vs.		vs.		vs.
			Glucose containing cultures		Glucose containing cultures		Glucose containing cultures		Arabinogalactan containing cultures		Carbon starved cultures		Carbon starved cultures
AN0042	No PKS/NRPS backbone 4		0.794569964		0.32131943		0.82473851		-0.503419079		-0.473250534		0.030168546
AN0043	No PKS/NRPS backbone 4		-0.471318354		-0.276634636		-0.553810795		0.277176158		0.194683717		-0.082492441
AN0044	No PKS/NRPS backbone 4		-0.239476506		0.005579475		-0.123925943		0.129505418		0.245055982		0.115550563
		Number of upregulated genes in the group:	0		0		0		0		0		0
		Number of downregulated genes in the group:	0		0		0		0		0		0
		Number of genes in the group:	3		3		3		3		3		3
		Total number of upregulated genes:	2371		1749		2159		1098		1253		836
		Total number of downregulated genes:	1967		1276		1705		1068		1233		928
		Total number of genes:	10867		10867		10867		10867		10867		10867
		p value for the upregulated genes:	1		1		1		1		1		1
		p value for the downregulated genes:	1		1		1		1		1		1
Gene ID	Cluster	Key Gene			log2FC values						log2FC values
			Carbon starved cultures		Lactose containing cultures		Arabinogalactan containing cultures		Lactose containing cultures		Lactose containing cultures		Arabinogalactan containing cultures
			vs.		vs.		vs.		vs.		vs.		vs.
			Glucose containing cultures		Glucose containing cultures		Glucose containing cultures		Arabinogalactan containing cultures		Carbon starved cultures		Carbon starved cultures
AN2621	Penicillin cluster	NRPS	1.075191375		-1.363109134		2.333609631		-3.696718765		-2.438300509		1.258418255
AN2622	Penicillin cluster		2.689401983		-0.361031409		2.547478077		-2.908509486		-3.050433393		-0.141923907
AN2623	Penicillin cluster		4.19817061		0.67033905		4.294194735		-3.623855685		-3.52783156		0.096024125
		Number of upregulated genes in the group:	3		0		3		0		0		1
		Number of downregulated genes in the group:	0		1		0		3		3		0
		Number of genes in the group:	3		3		3		3		3		3
		Total number of upregulated genes:	2371		1749		2159		1098		1253		836
		Total number of downregulated genes:	1967		1276		1705		1068		1233		928
		Total number of genes:	10867		10867		10867		10867		10867		10867
		p value for the upregulated genes:	0.01038		1		0.007833		1		1		0.2135
		p value for the downregulated genes:	1		0.3125		1		0.0009469		0.001458		1
Gene ID	Cluster	Key Gene			log2FC values						log2FC values
			Carbon starved cultures		Lactose containing cultures		Arabinogalactan containing cultures		Lactose containing cultures		Lactose containing cultures		Arabinogalactan containing cultures
			vs.		vs.		vs.		vs.		vs.		vs.
			Glucose containing cultures		Glucose containing cultures		Glucose containing cultures		Arabinogalactan containing cultures		Carbon starved cultures		Carbon starved cultures
AN11922	pkb cluster		3.587401116		2.53585932		2.495950809		0.039908511		-1.051541796		-1.091450307
AN6444	pkb cluster	NRPS	1.847300765		4.557865532		2.071740923		2.48612461		2.710564768		0.224440158
AN6445	pkb cluster		0.083606072		1.094900887		1.241522902		-0.146622014		1.011294816		1.15791683
AN6446	pkb cluster	TF	6.184680109		7.623084267		5.256681678		2.366402589		1.438404158		-0.927998431
AN6447	pkb cluster		3.49752091		5.654666303		1.935924286		3.718742017		2.157145393		-1.561596624
AN6448	pkb cluster	PKS	3.427569206		0.560518257		0.585056911		-0.024538654		-2.867050948		-2.842512294
AN6449	pkb cluster		8.324019804		5.986394713		4.30972655		1.676668163		-2.337625091		-4.014293254
AN6450	pkb cluster		4.061809253		3.718513058		1.631094389		2.087418669		-0.343296194		-2.430714864
AN6451	pkb cluster		4.646544432		3.233518302		1.112453916		2.121064387		-1.413026129		-3.534090516
		Number of upregulated genes in the group:	8		6		7		6		3		0
		Number of downregulated genes in the group:	0		0		0		0		3		5
		Number of genes in the group:	9		9		9		9		9		9
		Total number of upregulated genes:	2371		1749		2159		1098		1253		836
		Total number of downregulated genes:	1967		1276		1705		1068		1233		928
		Total number of genes:	10867		10867		10867		10867		10867		10867
		p value for the upregulated genes:	3.694e-05		0.0009313		0.0002984		6.741e-05		0.07545		1
		p value for the downregulated genes:	1		1		1		1		0.07252		0.0004228
Gene ID	Cluster	Key Gene			log2FC values						log2FC values
			Carbon starved cultures		Lactose containing cultures		Arabinogalactan containing cultures		Lactose containing cultures		Lactose containing cultures		Arabinogalactan containing cultures
			vs.		vs.		vs.		vs.		vs.		vs.
			Glucose containing cultures		Glucose containing cultures		Glucose containing cultures		Arabinogalactan containing cultures		Carbon starved cultures		Carbon starved cultures
AN0523	pkdA cluster	PKS	-1.073339896		-0.164072521		-0.880244384		0.716171864		0.909267375		0.193095512
AN0524	pkdA cluster		0.505329165		3.121987775		0.685027073		2.436960702		2.61665861		0.179697908
AN0525	pkdA cluster		1.767120787		3.500669653		0.85039904		2.650270613		1.733548866		-0.916721746
AN0526	pkdA cluster		1.455227684		1.519886669		0		1.654252842		0.064658985		-1.589593857
AN0527	pkdA cluster		0		2.474892508		0		2.609265145		2.847589415		0
AN0528	pkdA cluster		0.58910563		3.085489065		2.410705174		0.674783891		2.496383435		1.821599545
AN0529	pkdA cluster		3.842809759		2.270393816		3.497743766		-1.22734995		-1.572415943		-0.345065993
AN0530	pkdA cluster		-3.249928238		-1.383581245		-2.049808887		0.666227642		1.866346993		1.200119351
AN0531	pkdA cluster		-1.121716647		1.325611998		1.704675622		-0.379063625		2.447328645		2.826392269
AN0532	pkdA cluster		-0.600746068		0.231597935		0.003656836		0.227941099		0.832344002		0.604402904
AN0533	pkdA cluster	TF	3.08722741		1.151137551		1.198811601		-0.047674051		-1.936089859		-1.888415809
		Number of upregulated genes in the group:	2		3		3		1		2		1
		Number of downregulated genes in the group:	0		0		0		1		2		1
		Number of genes in the group:	11		11		11		11		11		11
		Total number of upregulated genes:	2371		1749		2159		1098		1253		836
		Total number of downregulated genes:	1967		1276		1705		1068		1233		928
		Total number of genes:	10867		10867		10867		10867		10867		10867
		p value for the upregulated genes:	0.7287		0.255		0.3782		0.6903		0.3676		0.5856
		p value for the downregulated genes:	1		1		1		0.6797		0.3599		0.6256
Gene ID	Cluster	Key Gene			log2FC values						log2FC values
			Carbon starved cultures		Lactose containing cultures		Arabinogalactan containing cultures		Lactose containing cultures		Lactose containing cultures		Arabinogalactan containing cultures
			vs.		vs.		vs.		vs.		vs.		vs.
			Glucose containing cultures		Glucose containing cultures		Glucose containing cultures		Arabinogalactan containing cultures		Carbon starved cultures		Carbon starved cultures
AN3225	pkf cluster		-3.919676303		-0.274211668		0.343124274		-0.617335942		3.645464636		4.262800577
AN3226	pkf cluster		-1.460223946		0.250161714		2.142426225		-1.892264511		1.71038566		3.602650171
AN3227	pkf cluster		-2.186284263		2.243493088		3.001329154		-0.757836066		4.429777351		5.187613417
AN3228	pkf cluster		-2.231168819		4.28531337		4.823868414		-0.538555044		6.516482189		7.055037234
AN3229	pkf cluster		1.789274155		0.904383529		0.970318342		-0.065934813		-0.884890626		-0.818955813
AN3230	pkf cluster	PKS	1.397715291		0.803379755		0.949854995		-0.146475239		-0.594335536		-0.447860296
		Number of upregulated genes in the group:	2		2		3		0		4		4
		Number of downregulated genes in the group:	2		0		0		1		0		0
		Number of genes in the group:	6		6		6		6		6		6
		Total number of upregulated genes:	2371		1749		2159		1098		1253		836
		Total number of downregulated genes:	1967		1276		1705		1068		1233		928
		Total number of genes:	10867		10867		10867		10867		10867		10867
		p value for the upregulated genes:	0.3893		0.2495		0.0972		1		0.002178		0.00046
		p value for the downregulated genes:	0.298		1		1		0.4625		1		1
Gene ID	Cluster	Key Gene			log2FC values						log2FC values
			Carbon starved cultures		Lactose containing cultures		Arabinogalactan containing cultures		Lactose containing cultures		Lactose containing cultures		Arabinogalactan containing cultures
			vs.		vs.		vs.		vs.		vs.		vs.
			Glucose containing cultures		Glucose containing cultures		Glucose containing cultures		Arabinogalactan containing cultures		Carbon starved cultures		Carbon starved cultures
AN7070	pkg cluster		2.756558188		3.172113745		-1.99132615		5.163439895		0.415555557		-4.747884338
AN7071	pkg cluster	PKS	4.234410115		5.664517622		0.75386636		4.910651262		1.430107507		-3.480543755
AN7072	pkg cluster		5.838972586		6.868444577		4.235023951		2.633420626		1.029471991		-1.603948635
AN7073	pkg cluster		5.280555777		5.052106863		4.133515165		0.918591698		-0.228448914		-1.147040612
AN7074	pkg cluster		2.37732292		3.498181672		0.848789043		2.649392629		1.120858752		-1.528533877
AN7075	pkg cluster		4.350912858		4.498082875		1.636765329		2.861317546		0.147170017		-2.714147529
		Number of upregulated genes in the group:	6		6		3		5		3		0
		Number of downregulated genes in the group:	0		0		0		0		0		6
		Number of genes in the group:	6		6		6		6		6		6
		Total number of upregulated genes:	2371		1749		2159		1098		1253		836
		Total number of downregulated genes:	1967		1276		1705		1068		1233		928
		Total number of genes:	10867		10867		10867		10867		10867		10867
		p value for the upregulated genes:	0.0001073		1.726e-05		0.0972		5.741e-05		0.02338		1
		p value for the downregulated genes:	1		1		1		1		1		3.821e-07
Gene ID	Cluster	Key Gene			log2FC values						log2FC values
			Carbon starved cultures		Lactose containing cultures		Arabinogalactan containing cultures		Lactose containing cultures		Lactose containing cultures		Arabinogalactan containing cultures
			vs.		vs.		vs.		vs.		vs.		vs.
			Glucose containing cultures		Glucose containing cultures		Glucose containing cultures		Arabinogalactan containing cultures		Carbon starved cultures		Carbon starved cultures
AN2030	pkh cluster		0.566232028		1.851548685		0.802817698		1.048730987		1.285316657		0.23658567
AN2031	pkh cluster		0.589097344		0		0		0		-0.943620638		-0.723463784
AN2032	pkh cluster	PKS	-4.87782496		-1.862148823		-3.370166002		1.508017179		3.015676137		1.507658958
AN2033	pkh cluster		-6.571946727		-4.024328144		-4.773557991		0.749229847		2.547618584		1.798388736
AN2034	pkh cluster		-2.761027648		-2.742860843		-1.560910699		-1.181950144		0		1.200116949
AN2035	pkh cluster	PKS	-3.395132747		-3.799867868		-3.454239966		-0.345627902		-0.404735121		-0.059107219
AN2036	pkh cluster	TF	-3.374467022		-2.249009838		-4.31218477		2.063174933		1.125457185		-0.937717748
AN2037	pkh cluster		-7.165482521		-4.173255844		-7.410782461		3.237526617		2.992226677		-0.245299941
AN2038	pkh cluster		-0.145012789		-0.590888875		-1.758818194		1.16792932		-0.445876086		-1.613805406
		Number of upregulated genes in the group:	0		0		0		3		3		1
		Number of downregulated genes in the group:	5		5		5		0		0		0
		Number of genes in the group:	9		9		9		9		9		9
		Total number of upregulated genes:	2371		1749		2159		1098		1253		836
		Total number of downregulated genes:	1967		1276		1705		1068		1233		928
		Total number of genes:	10867		10867		10867		10867		10867		10867
		p value for the upregulated genes:	1		1		1		0.0543		0.07545		0.5136
		p value for the downregulated genes:	0.01276		0.001856		0.006842		1		1		1
Gene ID	Cluster	Key Gene			log2FC values						log2FC values
			Carbon starved cultures		Lactose containing cultures		Arabinogalactan containing cultures		Lactose containing cultures		Lactose containing cultures		Arabinogalactan containing cultures
			vs.		vs.		vs.		vs.		vs.		vs.
			Glucose containing cultures		Glucose containing cultures		Glucose containing cultures		Arabinogalactan containing cultures		Carbon starved cultures		Carbon starved cultures
AN3379	pki cluster		3.59485791		2.586827077		3.753731007		-1.16690393		-1.008030833		0.158873097
AN3380	pki cluster		4.042050608		2.554250191		3.713546686		-1.159296495		-1.487800417		-0.328503922
AN3381	pki cluster		2.208684319		0.559027446		0.927083878		-0.368056432		-1.649656873		-1.281600441
AN3382	pki cluster		-0.16988354		0.434158248		1.497212266		-1.063054017		0.604041789		1.667095806
AN3383	pki cluster		1.547538642		3.998621429		3.183012025		0.815609404		2.451082786		1.635473383
AN3384	pki cluster		-0.214217705		-0.342186547		-0.627108371		0.284921825		-0.127968842		-0.412890667
AN3385	pki cluster	PKS	-0.126623809		0.649701779		-0.743550055		1.393251834		0.776325588		-0.616926246
AN3386	pki cluster	TF	2.699656499		1.973751135		2.301232748		-0.327481613		-0.725905364		-0.398423751
		Number of upregulated genes in the group:	4		4		4		1		1		0
		Number of downregulated genes in the group:	0		0		0		2		3		1
		Number of genes in the group:	8		8		8		8		8		8
		Total number of upregulated genes:	2371		1749		2159		1098		1253		836
		Total number of downregulated genes:	1967		1276		1705		1068		1233		928
		Total number of genes:	10867		10867		10867		10867		10867		10867
		p value for the upregulated genes:	0.07442		0.02716		0.05501		0.5736		0.6248		1
		p value for the downregulated genes:	1		1		1		0.1817		0.05268		0.5105
Gene ID	Cluster	Key Gene			log2FC values						log2FC values
			Carbon starved cultures		Lactose containing cultures		Arabinogalactan containing cultures		Lactose containing cultures		Lactose containing cultures		Arabinogalactan containing cultures
			vs.		vs.		vs.		vs.		vs.		vs.
			Glucose containing cultures		Glucose containing cultures		Glucose containing cultures		Arabinogalactan containing cultures		Carbon starved cultures		Carbon starved cultures
AN11013	Sterigmatocystin (stc) cluster		7.881070724		9.66665984		10.50685292		-0.840193082		1.785589116		2.625782198
AN11017	Sterigmatocystin (stc) cluster		8.476006551		10.62545475		11.35273647		-0.727281729		2.149448195		2.876729924
AN11021	Sterigmatocystin (stc) cluster		4.713630567		6.20452596		6.864789095		-0.660263135		1.490895393		2.151158528
AN12089	Sterigmatocystin (stc) cluster		9.807285692		12.36036487		12.63730932		-0.276944449		2.553079182		2.830023631
AN12090	Sterigmatocystin (stc) cluster		8.88768565		11.34959273		11.49369359		-0.144100864		2.461907081		2.606007945
AN7804	Sterigmatocystin (stc) cluster		6.511866672		8.546962985		8.838773656		-0.29181067		2.035096314		2.326906984
AN7805	Sterigmatocystin (stc) cluster		2.307817588		4.290647942		4.328065302		-0.03741736		1.982830354		2.020247714
AN7806	Sterigmatocystin (stc) cluster		7.628557302		9.663186251		9.930917953		-0.267731702		2.034628949		2.302360651
AN7807	Sterigmatocystin (stc) cluster		8.658434476		10.57304365		11.32762138		-0.754577724		1.914609177		2.669186901
AN7808	Sterigmatocystin (stc) cluster		8.037409332		10.25818801		10.99931434		-0.741126325		2.220778682		2.961905006
AN7809	Sterigmatocystin (stc) cluster		8.109648358		10.06672517		10.87109316		-0.80436799		1.957076815		2.761444805
AN7810	Sterigmatocystin (stc) cluster		9.003745572		10.81095854		11.4952004		-0.684241858		1.807212965		2.491454823
AN7811	Sterigmatocystin (stc) cluster		7.069105419		8.837480953		10.1456563		-1.308175347		1.768375534		3.076550881
AN7812	Sterigmatocystin (stc) cluster		8.504962883		10.81717646		11.22054688		-0.403370428		2.312213573		2.715584001
AN7814	Sterigmatocystin (stc) cluster	PKS	2.679522969		4.6512579		5.072300125		-0.421042225		1.97173493		2.392777155
AN7815	Sterigmatocystin (stc) cluster		2.599647731		5.207924504		5.177223119		0.030701385		2.608276773		2.577575389
AN7816	Sterigmatocystin (stc) cluster		3.917496026		5.634494293		5.816590225		-0.182095933		1.716998267		1.899094199
AN7817	Sterigmatocystin (stc) cluster		5.586570317		7.005835867		7.659756365		-0.653920498		1.419265549		2.073186047
AN7818	Sterigmatocystin (stc) cluster		3.569641748		5.542276954		6.006820242		-0.464543288		1.972635206		2.437178494
AN7819	Sterigmatocystin (stc) cluster		5.028738234		4.921459302		5.743452461		-0.821993159		-0.107278932		0.714714227
AN7820	Sterigmatocystin (stc) cluster	TF	6.233122442		6.962375535		7.37488536		-0.412509825		0.729253094		1.141762918
AN7821	Sterigmatocystin (stc) cluster		7.350419441		9.49872025		10.09295408		-0.594233835		2.148300809		2.742534644
AN7822	Sterigmatocystin (stc) cluster		2.667185083		3.274653059		3.614476999		-0.339823939		0.607467977		0.947291916
AN7823	Sterigmatocystin (stc) cluster		1.477355537		2.574924088		2.027075897		0.547848191		1.09756855		0.54972036
AN7824	Sterigmatocystin (stc) cluster		5.288099778		7.718012455		8.084252736		-0.366240281		2.429912678		2.796152958
AN7825	Sterigmatocystin (stc) cluster	PKS	6.206804968		8.845302566		9.32238458		-0.477082014		2.638497598		3.115579612
		Number of upregulated genes in the group:	26		26		26		0		24		23
		Number of downregulated genes in the group:	0		0		0		1		0		0
		Number of genes in the group:	26		26		26		26		26		26
		Total number of upregulated genes:	2371		1749		2159		1098		1253		836
		Total number of downregulated genes:	1967		1276		1705		1068		1233		928
		Total number of genes:	10867		10867		10867		10867		10867		10867
		p value for the upregulated genes:	2.2e-16		2.2e-16		2.2e-16		1		2.2e-16		2.2e-16
		p value for the downregulated genes:	1		1		1		0.9323		1		1
Gene ID	Cluster	Key Gene			log2FC values						log2FC values
			Carbon starved cultures		Lactose containing cultures		Arabinogalactan containing cultures		Lactose containing cultures		Lactose containing cultures		Arabinogalactan containing cultures
			vs.		vs.		vs.		vs.		vs.		vs.
			Glucose containing cultures		Glucose containing cultures		Glucose containing cultures		Arabinogalactan containing cultures		Carbon starved cultures		Carbon starved cultures
AN8513	Terriquinone (tdi) cluster	NRPS	5.678508559		8.290703876		9.441104098		-1.150400221		2.612195317		3.762595538
AN8514	Terriquinone (tdi) cluster	DMATS type aromatic prenyltransferase	3.968034743		6.143620534		7.572353775		-1.428733241		2.175585791		3.604319032
AN8516	Terriquinone (tdi) cluster		5.72820874		6.907442689		10.01523553		-3.107792844		1.179233949		4.287026793
AN8518	Terriquinone (tdi) cluster		2.911205698		5.176137545		4.472773175		0.703364371		2.264931847		1.561567477
AN8520	Terriquinone (tdi) cluster		4.669762223		5.923107644		6.242892536		-0.319784892		1.25334542		1.573130313
		Number of upregulated genes in the group:	5		5		5		0		5		5
		Number of downregulated genes in the group:	0		0		0		3		0		0
		Number of genes in the group:	5		5		5		5		5		5
		Total number of upregulated genes:	2371		1749		2159		1098		1253		836
		Total number of downregulated genes:	1967		1276		1705		1068		1233		928
		Total number of genes:	10867		10867		10867		10867		10867		10867
		p value for the upregulated genes:	0.0004928		0.0001075		0.0003084		1		2.024e-05		2.665e-06
		p value for the downregulated genes:	1		1		1		0.008131		1		1
Gene ID	Cluster	Key Gene			log2FC values						log2FC values
			Carbon starved cultures		Lactose containing cultures		Arabinogalactan containing cultures		Lactose containing cultures		Lactose containing cultures		Arabinogalactan containing cultures
			vs.		vs.		vs.		vs.		vs.		vs.
			Glucose containing cultures		Glucose containing cultures		Glucose containing cultures		Arabinogalactan containing cultures		Carbon starved cultures		Carbon starved cultures
AN11527	xptA-containing cluster		0.230065021		0.21883531		2.027670368		-1.808835058		-0.011229711		1.797605347
AN6784	xptA-containing cluster	DMATS type aromatic prenyltransferase	1.101951513		7.298951754		2.611346937		4.687604817		6.197000241		1.509395425
AN6785	xptA-containing cluster		1.726783715		1.951772697		3.174254735		-1.222482039		0.224988982		1.447471021
AN6786	xptA-containing cluster		-3.560362016		-1.207174983		-2.096076037		0.888901054		2.353187033		1.464285979
AN11907	xptA-containing cluster		-1.722918216		-1.602691397		-2.084653789		0.481962392		0.120226819		-0.361735573
AN6787	xptA-containing cluster		-0.767727603		2.366884639		1.931570528		0.435314112		3.134612242		2.69929813
AN6788	xptA-containing cluster	TF	-2.500198009		-0.729525828		-0.832065281		0.102539453		1.770672181		1.668132728
AN6789	xptA-containing cluster		-6.564887687		-4.461495062		-6.234384291		1.772889229		2.103392625		0.330503396
AN6790	xptA-containing cluster	TF	-0.477232912		-0.521205493		-0.536015868		0.014810376		-0.04397258		-0.058782956
AN6791	xptA-containing cluster	PKS	1.248998335		0.96983406		0.936337597		0.033496463		-0.279164275		-0.312660738
		Number of upregulated genes in the group:	3		3		3		2		5		5
		Number of downregulated genes in the group:	4		3		3		1		0		0
		Number of genes in the group:	10		10		10		10		10		10
		Total number of upregulated genes:	2371		1749		2159		1098		1253		836
		Total number of downregulated genes:	1967		1276		1705		1068		1233		928
		Total number of genes:	10867		10867		10867		10867		10867		10867
		p value for the upregulated genes:	0.3776		0.2089		0.3182		0.2679		0.003093		0.0004837
		p value for the downregulated genes:	0.08975		0.1032		0.1979		0.6448		1		1
Gene ID	Cluster	Key Gene			log2FC values						log2FC values
			Carbon starved cultures		Lactose containing cultures		Arabinogalactan containing cultures		Lactose containing cultures		Lactose containing cultures		Arabinogalactan containing cultures
			vs.		vs.		vs.		vs.		vs.		vs.
			Glucose containing cultures		Glucose containing cultures		Glucose containing cultures		Arabinogalactan containing cultures		Carbon starved cultures		Carbon starved cultures
AN11907	AN6791 cluster		-1.722918216		-1.602691397		-2.084653789		0.481962392		0.120226819		-0.361735573
AN6787	AN6791 cluster		-0.767727603		2.366884639		1.931570528		0.435314112		3.134612242		2.69929813
AN6788	AN6791 cluster	TF	-2.500198009		-0.729525828		-0.832065281		0.102539453		1.770672181		1.668132728
AN6789	AN6791 cluster		-6.564887687		-4.461495062		-6.234384291		1.772889229		2.103392625		0.330503396
AN6790	AN6791 cluster	TF	-0.477232912		-0.521205493		-0.536015868		0.014810376		-0.04397258		-0.058782956
AN6791	AN6791 cluster	PKS	1.248998335		0.96983406		0.936337597		0.033496463		-0.279164275		-0.312660738
		Number of upregulated genes in the group:	1		1		1		1		3		2
		Number of downregulated genes in the group:	3		2		2		0		0		0
		Number of genes in the group:	6		6		6		6		6		6
		Total number of upregulated genes:	2371		1749		2159		1098		1253		836
		Total number of downregulated genes:	1967		1276		1705		1068		1233		928
		Total number of genes:	10867		10867		10867		10867		10867		10867
		p value for the upregulated genes:	0.7717		0.6512		0.7353		0.4723		0.02338		0.07203
		p value for the downregulated genes:	0.07689		0.15		0.2398		1		1		1
Gene ID	Cluster	Key Gene			log2FC values						log2FC values
			Carbon starved cultures		Lactose containing cultures		Arabinogalactan containing cultures		Lactose containing cultures		Lactose containing cultures		Arabinogalactan containing cultures
			vs.		vs.		vs.		vs.		vs.		vs.
			Glucose containing cultures		Glucose containing cultures		Glucose containing cultures		Arabinogalactan containing cultures		Carbon starved cultures		Carbon starved cultures
AN12402	xptB-containing cluster	Prenyltransferase	0.621721034		3.707764101		0.795345415		2.912418686		3.086043068		0.173624382
AN7999	xptB-containing cluster		1.189714022		6.256745208		1.362380404		4.894364804		5.067031185		0.172666381
AN9467	xptB-containing cluster		0.026846108		0.027897678		0.259090495		-0.231192817		0.00105157		0.232244387
AN12431	xptB-containing cluster (AN12431)		-0.925053545		-0.083985328		-0.222308346		0.138323018		0.841068217		0.702745199
		Number of upregulated genes in the group:	1		2		1		2		2		0
		Number of downregulated genes in the group:	0		0		0		0		0		0
		Number of genes in the group:	4		4		4		4		4		4
		Total number of upregulated genes:	2371		1749		2159		1098		1253		836
		Total number of downregulated genes:	1967		1276		1705		1068		1233		928
		Total number of genes:	10867		10867		10867		10867		10867		10867
		p value for the upregulated genes:	0.6264		0.124		0.5877		0.05328		0.068		1
		p value for the downregulated genes:	1		1		1		1		1		1

## Sheet: Sheet 2
	Summary of the enrichment analyses.
	Red and blue colors indicate upregulated and downregulated clusters, respectively.
	A cluster was regarded upregulated or downregulated if the genes belonging that cluster significantly enriched (Fisher's exact test, p < 0.05) in the studied upregulated or downregulated gene set.
	Highlighted figures represent clusters upregulated ( or downregulated) in the appropriate culture relative to all the three other cultures.
Cluster	Glucose containing cultures				Lactose containing cultures				Arabinogalactan containing cultures				Carbon starved cultures
	vs.				vs.				vs.				vs.
	Carbon starved cultures	Lactose containing cultures	Arabinogalactan containing cultures		Arabinogalactan containing cultures	Carbon starved cultures	Glucose containing cultures		Lactose containing cultures	Carbon starved cultures	Glucose containing cultures		Lactose containing cultures	Arabinogalactan containing cultures	Glucose containing cultures
AN1784 cluster	0	0	0		0	0	0		0	-1	0		0	1	0
AN3252 cluster	0	0	0		1	0	0		-1	-1	0		0	1	0
AN4827 cluster	-1	0	0		-1	-1	0		1	-1	0		1	1	1
AN7084 cluster	0	0	0		1	0	0		-1	-1	0		0	1	0
Austinol (aus) cluster 1	-1	0	-1		0	-1	0		0	-1	1		1	1	1
pkb cluster	-1	-1	-1		1	0	1		-1	-1	1		0	1	1
pkg cluster	-1	-1	0		1	1	1		-1	-1	0		-1	1	1
AN0016 cluster	-1	-1	-1		-1	-1	1		1	0	1		1	0	1
AN0607 (sidC) cluster	0	0	0		0	0	0		0	0	0		0	0	0
AN10289 cluster	0	0	0		0	0	0		0	0	0		0	0	0
AN10396 cluster	0	0	0		0	0	0		0	0	0		0	0	0
AN10486 cluster	0	0	0		0	0	0		0	0	0		0	0	0
AN11191 cluster (asperlin)	0	0	0		0	0	0		0	0	0		0	0	0
AN11194 cluster	0	0	0		0	0	0		0	0	0		0	0	0
AN9226 cluster	0	0	0		0	0	0		0	0	0		0	0	0
AN12331 cluster, AN7838 (AN12331) cluster	0	1	0		-1	0	-1		1	0	0		0	0	0
AN1242 cluster	0	0	0		0	0	0		0	0	0		0	0	0
AN1594 cluster	0	0	1		1	0	0		-1	0	-1		0	0	0
AN1680 cluster	-1	0	-1		0	0	0		0	0	1		0	0	1
AN1793 cluster	1	0	1		0	0	0		0	0	-1		0	0	-1
AN2924 cluster	0	0	0		0	0	0		0	0	0		0	0	0
AN5318 cluster	0	0	0		0	0	0		0	0	0		0	0	0
AN5610 cluster	0	0	0		0	1	0		0	0	0		-1	0	0
AN6236 cluster	0	0	0		0	0	0		0	0	0		0	0	0
AN6431 cluster	0	0	0		1	0	0		-1	0	0		0	0	0
AN7489 (mirC) cluster	0	0	0		0	0	0		0	0	0		0	0	0
AN7884 cluster (aspercryptin)	1	1	0		0	0	-1		0	0	0		0	0	-1
AN8105 cluster	-1	-1	-1		0	1	1		0	0	1		-1	0	1
AN8142 cluster	0	-1	-1		1	1	1		-1	0	1		-1	0	0
AN8209 (wA) cluster	0	0	0		0	0	0		0	0	0		0	0	0
AN8504 cluster	0	0	0		0	0	0		0	0	0		0	0	0
AN8910 cluster	0	1	1		0	-1	-1		0	0	-1		1	0	0
AN9005 cluster	0	0	0		0	0	0		0	0	0		0	0	0
AN9129 cluster	-1	-1	-1		-1	0	1		1	0	1		0	0	1
AN9291 (AN11820) cluster	-1	0	0		0	0	0		0	0	0		0	0	1
AN9314 cluster	-1	-1	-1		-1	-1	1		1	0	1		1	0	1
Asperfuranone (afo) cluster	0	0	0		1	0	0		-1	0	0		0	0	0
Asperthecin (apt) cluster	0	0	0		0	0	0		0	0	0		0	0	0
Aspyridone (asp) cluster	0	1	1		0	0	-1		0	0	-1		0	0	0
Austinol (aus) cluster 2	0	0	0		0	0	0		0	0	0		0	0	0
Derivative of Benzaldehyde1 (dba) and F9775 hybrid cluster 1	0	-1	0		1	1	1		-1	0	0		-1	0	0
inp cluster	1	0	0		1	0	0		-1	0	0		0	0	-1
Microperfuranone (mic) cluster	1	1	1		1	1	-1		-1	0	-1		-1	0	-1
Monodictyphenone (mdp) cluster	-1	-1	-1		1	1	1		-1	0	1		-1	0	1
Nidulanin A (nptA) cluster	0	0	0		0	0	0		0	0	0		0	0	0
No PKS/NRPS backbone 1	1	0	1		1	1	0		-1	0	-1		-1	0	-1
No PKS/NRPS backbone 3	1	0	1		0	0	0		0	0	-1		0	0	-1
No PKS/NRPS backbone 4	0	0	0		0	0	0		0	0	0		0	0	0
Penicillin cluster	-1	0	-1		-1	-1	0		1	0	1		1	0	1
pkdA cluster	0	0	0		0	0	0		0	0	0		0	0	0
pkh cluster	1	1	1		0	0	-1		0	0	-1		0	0	-1
pki cluster	0	-1	0		0	0	1		0	0	0		0	0	0
AN6791 cluster	0	0	0		0	1	0		0	0	0		-1	0	0
xptB-containing cluster (AN12431)	0	0	0		0	0	0		0	0	0		0	0	0
AN10297 cluster	0	0	0		0	0	0		0	1	0		0	-1	0
AN10430 cluster	0	-1	0		0	1	1		0	1	0		-1	-1	0
AN3273 cluster	1	1	1		0	1	-1		0	1	-1		-1	-1	-1
AN3612 cluster	0	0	0		0	1	0		0	1	0		-1	-1	0
Derivative of Benzaldehyde1 (dba) and F9775 hybrid cluster 2	0	-1	0		1	1	1		-1	1	0		-1	-1	0
Emericellamide (eas) cluster	0	0	-1		-1	0	0		1	1	1		0	-1	0
ivo cluster	-1	-1	-1		-1	0	1		1	1	1		0	-1	1
pkf cluster	0	0	0		0	1	0		0	1	0		-1	-1	0
Sterigmatocystin (stc) cluster	-1	-1	-1		0	1	1		0	1	1		-1	-1	1
Terriquinone (tdi) cluster	-1	-1	-1		-1	1	1		1	1	1		-1	-1	1
xptA-containing cluster	0	0	0		0	1	0		0	1	0		-1	-1	0
Number of upregulated culsters:	8	7	9		14	17	15		9	11	14		6	6	15
Number of downregulated clusters:	15	15	14		9	6	7		14	7	9		17	11	8

## Sheet: Sheet 3
	Distribution of upregulated and downregulated secondary metabolism clusters among the treatments.
	The sheet contains four Venn-diagrams. In each Venn-diagrams three types of cultures are pairwise compared to the fourth cultures.
	Note, the upregulated (downregulated) clusters in the intersection of the three sets identical with clusters downregulated (upregulated) in the reference culture relative to all the other cultures.
	Carbon starved cultures				Arabinogalactan containing cultures				Lactose containing cultures				Arabinogalactan containing cultures
	vs.				vs.				vs.				vs.
	Glucose containing cultures				Glucose containing cultures				Carbon starved cultures				Carbon starved cultures
	15/7				14/9				17/6				11/6
		4/1	1/2	1/1						7/1	7/0	3/3
			9/3								1/2
		1/1		3/3						2/3		0/2
			2/1								5/8
		15/8								8/15
		Lactose containing cultures								Glucose containing cultures
		vs.								vs.
		Glucose containing cultures								Carbon starved cultures
	Arabinogalactan containing cultures				Carbon starved cultures				Lactose containing cultures				Carbon starved cultures
	vs.				vs.				vs.				vs.
	Lactose containing cultures				Lactose containing cultures				Arabinogalactan containing cultures				Arabinogalactan containing cultures
	9/14				6/17				14/9				7/11
		4/6	4/2	1/6						7/2	4/0	3/7
			0/5								0/3
		1/1		1/4						6/4		0/1
			5/5								6/6
		7/15								9/14
		Glucose containing cultures								Glucose containing cultures
		vs.								vs.
		Lactose containing cultures								Arabinogalactan containing cultures
