# Supplementary material for: Strategies Shaping the Transcription of Carbohydrate-Active Enzyme Genes in Aspergillus nidulans
Source: J Fungi (Basel). 2022 Jan 14;8(1):79. doi: 10.3390/jof8010079 (PMC8780418; doi:10.3390/jof8010079)
Supplement: Supplementary file 1 [file jof-08-00079-s001.zip › jof-1527581-supplementary/Table S4.xlsx]

## Sheet: Overview
		Table S4	Secretom data of selected proteins
		Sheet 1	LC–MS/MS data of selected protein dots from 2-D gels of proteins secreted by carbon starved cultures.
		Sheet 2	Summary table of the proteins identified from the fermentation broth of carbon starved cultures.
			Red and blue colors indicate upregulated and downregulated genes, respectively.
			a - According to Aspergillus Genome Database (http://www.aspgd.org/).
			b - According to the reference(s) mentioned at the definition of the appropriate gene group in the Materials and methods chapter of the manuscript.
			c - This study
			d - According to Spitzmüller et al. (2015) [39].

## Sheet: Sheet 1
	LC–MS/MS data of selected protein dots from 2-D gels of proteins secreted by carbon starved cultures.
Dot id	%Cov	Accessions	Names	Conf	Sequence	Modifications	Cleavages	dMass	Prec MW	Prec m/z	Theor MW	Theor m/z	Theor z	Sc	Spectrum	Specific	Time	PrecursorSignal	PrecursorElution
1	34.69	sp|Q5AUM3|ABNC_EMENI	Arabinan endo-1,5-alpha-L-arabinosidase C OS=Emericella nidulans (strain FGSC A4 / ATCC 38163 / CBS 112.46 / NRRL 194 / M139) GN=abnC PE=2 SV=1	99	AGSYDTNPPATGEEYR			-0.0271147	1726.72	864.365	1726.74	864.379	2	15	1.1.1.287.4	1	25.5418	0	-1
1	34.69	sp|Q5AUM3|ABNC_EMENI	Arabinan endo-1,5-alpha-L-arabinosidase C OS=Emericella nidulans (strain FGSC A4 / ATCC 38163 / CBS 112.46 / NRRL 194 / M139) GN=abnC PE=2 SV=1	99	GWYYLTFSSGR			-0.0517622	1335.57	668.794	1335.62	668.82	2	16	1.1.1.372.3	1	33.6822	0	-1
1	34.69	sp|Q5AUM3|ABNC_EMENI	Arabinan endo-1,5-alpha-L-arabinosidase C OS=Emericella nidulans (strain FGSC A4 / ATCC 38163 / CBS 112.46 / NRRL 194 / M139) GN=abnC PE=2 SV=1	99	SASGTGDFVDK			-0.0257411	1082.46	542.238	1082.49	542.251	2	15	1.1.1.285.3	1	25.2452	0	-1
1	34.69	sp|Q5AUM3|ABNC_EMENI	Arabinan endo-1,5-alpha-L-arabinosidase C OS=Emericella nidulans (strain FGSC A4 / ATCC 38163 / CBS 112.46 / NRRL 194 / M139) GN=abnC PE=2 SV=1	99	SASGTGDFVDKSGR		missed K-S@11	0.027228	1382.67	692.342	1382.64	692.329	2	12	1.1.1.279.3	1	24.5569	0	-1
1	34.69	sp|Q5AUM3|ABNC_EMENI	Arabinan endo-1,5-alpha-L-arabinosidase C OS=Emericella nidulans (strain FGSC A4 / ATCC 38163 / CBS 112.46 / NRRL 194 / M139) GN=abnC PE=2 SV=1	99	SCLTDNGGTTILASHGNVYGPGGQGVFEDR	Carbamidomethyl(C)@2		0.00678485	3078.42	1027.15	3078.41	1027.14	3	18	1.1.1.349.3	1	30.8747	0	-1
1	34.69	sp|Q5AUM3|ABNC_EMENI	Arabinan endo-1,5-alpha-L-arabinosidase C OS=Emericella nidulans (strain FGSC A4 / ATCC 38163 / CBS 112.46 / NRRL 194 / M139) GN=abnC PE=2 SV=1	99	AGSYDTNPPATGEEYR			-0.0146617	1726.73	864.372	1726.74	864.379	2	18	1.1.1.288.3	1	25.6263	0	-1
1	34.69	sp|Q5AUM3|ABNC_EMENI	Arabinan endo-1,5-alpha-L-arabinosidase C OS=Emericella nidulans (strain FGSC A4 / ATCC 38163 / CBS 112.46 / NRRL 194 / M139) GN=abnC PE=2 SV=1	99	AGSYDTNPPATGEEYR			-0.0124642	1726.73	864.373	1726.74	864.379	2	14	1.1.1.289.3	1	25.7517	0	-1
1	34.69	sp|Q5AUM3|ABNC_EMENI	Arabinan endo-1,5-alpha-L-arabinosidase C OS=Emericella nidulans (strain FGSC A4 / ATCC 38163 / CBS 112.46 / NRRL 194 / M139) GN=abnC PE=2 SV=1	99	AGSYDTNPPATGEEYR			0.0339291	1726.78	864.396	1726.74	864.379	2	16	1.1.1.290.3	1	25.8752	0	-1
1	34.69	sp|Q5AUM3|ABNC_EMENI	Arabinan endo-1,5-alpha-L-arabinosidase C OS=Emericella nidulans (strain FGSC A4 / ATCC 38163 / CBS 112.46 / NRRL 194 / M139) GN=abnC PE=2 SV=1	99	AGSYDTNPPATGEEYR			-0.0268705	1726.72	864.365	1726.74	864.379	2	15	1.1.1.291.3	1	25.9946	0	-1
1	34.69	sp|Q5AUM3|ABNC_EMENI	Arabinan endo-1,5-alpha-L-arabinosidase C OS=Emericella nidulans (strain FGSC A4 / ATCC 38163 / CBS 112.46 / NRRL 194 / M139) GN=abnC PE=2 SV=1	99	AGSYDTNPPATGEEYR			0.0120754	1726.76	864.385	1726.74	864.379	2	14	1.1.1.292.3	1	26.1152	0	-1
1	34.69	sp|Q5AUM3|ABNC_EMENI	Arabinan endo-1,5-alpha-L-arabinosidase C OS=Emericella nidulans (strain FGSC A4 / ATCC 38163 / CBS 112.46 / NRRL 194 / M139) GN=abnC PE=2 SV=1	99	AGSYDTNPPATGEEYR	Methyl(E)@14		0.00205472	1740.76	871.388	1740.76	871.387	2	17	1.1.1.295.3	1	26.495	0	-1
1	34.69	sp|Q5AUM3|ABNC_EMENI	Arabinan endo-1,5-alpha-L-arabinosidase C OS=Emericella nidulans (strain FGSC A4 / ATCC 38163 / CBS 112.46 / NRRL 194 / M139) GN=abnC PE=2 SV=1	99	AGSYDTNPPATGEEYR	Methyl(E)@14		-0.00661349	1740.75	871.384	1740.76	871.387	2	14	1.1.1.297.4	1	26.7029	0	-1
1	34.69	sp|Q5AUM3|ABNC_EMENI	Arabinan endo-1,5-alpha-L-arabinosidase C OS=Emericella nidulans (strain FGSC A4 / ATCC 38163 / CBS 112.46 / NRRL 194 / M139) GN=abnC PE=2 SV=1	99	AGSYDTNPPATGEEYR	Methyl(E)@14		-0.0211419	1740.74	871.376	1740.76	871.387	2	14	1.1.1.296.3	1	26.6213	0	-1
1	34.69	sp|Q5AUM3|ABNC_EMENI	Arabinan endo-1,5-alpha-L-arabinosidase C OS=Emericella nidulans (strain FGSC A4 / ATCC 38163 / CBS 112.46 / NRRL 194 / M139) GN=abnC PE=2 SV=1	99	GWYYLTFSSGR			0.00110166	1335.63	668.82	1335.62	668.82	2	14	1.1.1.373.3	1	33.8091	0	-1
1	34.69	sp|Q5AUM3|ABNC_EMENI	Arabinan endo-1,5-alpha-L-arabinosidase C OS=Emericella nidulans (strain FGSC A4 / ATCC 38163 / CBS 112.46 / NRRL 194 / M139) GN=abnC PE=2 SV=1	99	SASGTGDFVDK			-0.000591064	1082.49	542.251	1082.49	542.251	2	13	1.1.1.286.3	1	25.3685	0	-1
1	34.69	sp|Q5AUM3|ABNC_EMENI	Arabinan endo-1,5-alpha-L-arabinosidase C OS=Emericella nidulans (strain FGSC A4 / ATCC 38163 / CBS 112.46 / NRRL 194 / M139) GN=abnC PE=2 SV=1	99	SASGTGDFVDK			0.0171116	1082.51	542.26	1082.49	542.251	2	11	1.1.1.284.3	1	25.1266	0	-1
1	34.69	sp|Q5AUM3|ABNC_EMENI	Arabinan endo-1,5-alpha-L-arabinosidase C OS=Emericella nidulans (strain FGSC A4 / ATCC 38163 / CBS 112.46 / NRRL 194 / M139) GN=abnC PE=2 SV=1	99	SASGTGDFVDK	Methyl(D)@10		0.00513751	1096.51	549.262	1096.5	549.259	2	12	1.1.1.294.3	1	26.3687	0	-1
1	34.69	sp|Q5AUM3|ABNC_EMENI	Arabinan endo-1,5-alpha-L-arabinosidase C OS=Emericella nidulans (strain FGSC A4 / ATCC 38163 / CBS 112.46 / NRRL 194 / M139) GN=abnC PE=2 SV=1	99	SASGTGDFVDKSGR		missed K-S@11	0.0382159	1382.68	692.348	1382.64	692.329	2	14	1.1.1.280.3	1	24.6823	0	-1
1	34.69	sp|Q5AUM3|ABNC_EMENI	Arabinan endo-1,5-alpha-L-arabinosidase C OS=Emericella nidulans (strain FGSC A4 / ATCC 38163 / CBS 112.46 / NRRL 194 / M139) GN=abnC PE=2 SV=1	99	SASGTGDFVDKSGR		missed K-S@11	0.0644647	1382.71	692.361	1382.64	692.329	2	13	1.1.1.278.3	1	24.4317	0	-1
1	34.69	sp|Q5AUM3|ABNC_EMENI	Arabinan endo-1,5-alpha-L-arabinosidase C OS=Emericella nidulans (strain FGSC A4 / ATCC 38163 / CBS 112.46 / NRRL 194 / M139) GN=abnC PE=2 SV=1	99	SASGTGDFVDKSGR		missed K-S@11	-0.0184327	1382.62	692.319	1382.64	692.329	2	12	1.1.1.281.3	1	24.7636	0	-1
2	21.09	sp|Q5B5S8|BGLA_EMENI	Probable beta-glucosidase A OS=Emericella nidulans (strain FGSC A4 / ATCC 38163 / CBS 112.46 / NRRL 194 / M139) GN=bglA PE=3 SV=2	99	CVGQTGSVPR	Carbamidomethyl(C)@1		0.286773	1059.8	530.907	1059.51	530.764	2	12	1.1.1.278.3	1	16.6974	0	-1
2	21.09	sp|Q5B5S8|BGLA_EMENI	Probable beta-glucosidase A OS=Emericella nidulans (strain FGSC A4 / ATCC 38163 / CBS 112.46 / NRRL 194 / M139) GN=bglA PE=3 SV=2	99	GIQDAGVIATAK			-0.0359361	1142.59	572.304	1142.63	572.322	2	17	1.1.1.313.4	1	19.9756	0	-1
2	21.09	sp|Q5B5S8|BGLA_EMENI	Probable beta-glucosidase A OS=Emericella nidulans (strain FGSC A4 / ATCC 38163 / CBS 112.46 / NRRL 194 / M139) GN=bglA PE=3 SV=2	99	HYLLNEQEHFR			0.305872	1485.02	496.015	1484.72	495.913	3	15	1.1.1.318.3	1	20.4193	0	-1
2	21.09	sp|Q5B5S8|BGLA_EMENI	Probable beta-glucosidase A OS=Emericella nidulans (strain FGSC A4 / ATCC 38163 / CBS 112.46 / NRRL 194 / M139) GN=bglA PE=3 SV=2	99	LATPPNFSSWTR			0.0218512	1375.71	688.862	1375.69	688.852	2	10	1.1.1.372.4	1	25.8946	0	-1
2	21.09	sp|Q5B5S8|BGLA_EMENI	Probable beta-glucosidase A OS=Emericella nidulans (strain FGSC A4 / ATCC 38163 / CBS 112.46 / NRRL 194 / M139) GN=bglA PE=3 SV=2	99	LGINSICLQDGPLGIR	Carbamidomethyl(C)@7		0.176146	1725.1	576.041	1724.92	575.982	3	15	1.1.1.405.4	1	29.1782	0	-1
2	21.09	sp|Q5B5S8|BGLA_EMENI	Probable beta-glucosidase A OS=Emericella nidulans (strain FGSC A4 / ATCC 38163 / CBS 112.46 / NRRL 194 / M139) GN=bglA PE=3 SV=2	99	LNAPAYSPASGQTK			0.181955	1403.89	702.951	1403.7	702.859	2	10	1.1.1.301.3	1	18.7442	0	-1
2	21.09	sp|Q5B5S8|BGLA_EMENI	Probable beta-glucosidase A OS=Emericella nidulans (strain FGSC A4 / ATCC 38163 / CBS 112.46 / NRRL 194 / M139) GN=bglA PE=3 SV=2	99	RVGADSIVLLKNEGSLPLTGKER		missed R-V@1; missed K-N@11; missed K-E@21	1.23353	2452.61	614.161	2451.38	613.852	4	19	1.1.1.361.3	1	24.7298	0	-1
2	21.09	sp|Q5B5S8|BGLA_EMENI	Probable beta-glucosidase A OS=Emericella nidulans (strain FGSC A4 / ATCC 38163 / CBS 112.46 / NRRL 194 / M139) GN=bglA PE=3 SV=2	99	VGADSIVLLK			0.306578	1013.92	507.967	1013.61	507.813	2	10	1.1.1.363.3	1	24.9352	0	-1
2	21.09	sp|Q5B5S8|BGLA_EMENI	Probable beta-glucosidase A OS=Emericella nidulans (strain FGSC A4 / ATCC 38163 / CBS 112.46 / NRRL 194 / M139) GN=bglA PE=3 SV=2	99	VGADSIVLLKNEGSLPLTGKER	Deamidated(N)@11	missed K-N@10; missed K-E@20	-0.908899	2295.35	574.846	2296.26	575.073	4	15	1.1.1.370.4	1	25.6891	0	-1
2	21.09	sp|Q5B5S8|BGLA_EMENI	Probable beta-glucosidase A OS=Emericella nidulans (strain FGSC A4 / ATCC 38163 / CBS 112.46 / NRRL 194 / M139) GN=bglA PE=3 SV=2	96.58	GFDKLVIQPGEER		missed K-L@4	0.0650156	1486.84	496.622	1486.78	496.6	3	12	1.1.1.339.4	1	22.5405	0	-1
2	21.09	sp|Q5B5S8|BGLA_EMENI	Probable beta-glucosidase A OS=Emericella nidulans (strain FGSC A4 / ATCC 38163 / CBS 112.46 / NRRL 194 / M139) GN=bglA PE=3 SV=2	95.97	KVFVGSSSR		missed K-V@1	0.207238	965.737	483.876	965.529	483.772	2	7	1.1.1.276.3	1	16.4922	0	-1
2	21.09	sp|Q5B5S8|BGLA_EMENI	Probable beta-glucosidase A OS=Emericella nidulans (strain FGSC A4 / ATCC 38163 / CBS 112.46 / NRRL 194 / M139) GN=bglA PE=3 SV=2	93.57	LYDDLFR			0.340022	940.805	471.41	940.465	471.24	2	11	1.1.1.374.3	1	26.0652	0	-1
2	21.09	sp|Q5B5S8|BGLA_EMENI	Probable beta-glucosidase A OS=Emericella nidulans (strain FGSC A4 / ATCC 38163 / CBS 112.46 / NRRL 194 / M139) GN=bglA PE=3 SV=2	92.94	LVIQPGEER			0.222217	1039.79	520.902	1039.57	520.79	2	8	1.1.1.307.3	1	19.325	0	-1
2	21.09	sp|Q5B5S8|BGLA_EMENI	Probable beta-glucosidase A OS=Emericella nidulans (strain FGSC A4 / ATCC 38163 / CBS 112.46 / NRRL 194 / M139) GN=bglA PE=3 SV=2	83.68	LYDDLFRITAIIK		missed R-I@7	0.649944	1580.55	527.856	1579.9	527.64	3	11	1.1.1.430.3	1	31.3612	0	-1
2	21.09	sp|Q5B5S8|BGLA_EMENI	Probable beta-glucosidase A OS=Emericella nidulans (strain FGSC A4 / ATCC 38163 / CBS 112.46 / NRRL 194 / M139) GN=bglA PE=3 SV=2	62.41	VFTTTLTR			-0.00725579	937.516	469.765	937.523	469.769	2	7	1.1.1.322.4	1	20.8301	0	-1
2	21.09	sp|Q5B5S8|BGLA_EMENI	Probable beta-glucosidase A OS=Emericella nidulans (strain FGSC A4 / ATCC 38163 / CBS 112.46 / NRRL 194 / M139) GN=bglA PE=3 SV=2	49.07	NEGSLPLTGK	Deamidated(N)@1		-1.05133	1014.47	508.241	1015.52	508.767	2	6	1.1.1.312.4	1	19.8731	0	-1
2	21.09	sp|Q5B5S8|BGLA_EMENI	Probable beta-glucosidase A OS=Emericella nidulans (strain FGSC A4 / ATCC 38163 / CBS 112.46 / NRRL 194 / M139) GN=bglA PE=3 SV=2	99	CVGQTGSVPR	Carbamidomethyl(C)@1		0.245147	1059.76	530.886	1059.51	530.764	2	10	1.1.1.279.3	1	16.8	0	-1
2	21.09	sp|Q5B5S8|BGLA_EMENI	Probable beta-glucosidase A OS=Emericella nidulans (strain FGSC A4 / ATCC 38163 / CBS 112.46 / NRRL 194 / M139) GN=bglA PE=3 SV=2	98.95	CVGQTGSVPR	Carbamidomethyl(C)@1		0.312163	1059.83	530.92	1059.51	530.764	2	8	1.1.1.281.3	1	17.0052	0	-1
2	21.09	sp|Q5B5S8|BGLA_EMENI	Probable beta-glucosidase A OS=Emericella nidulans (strain FGSC A4 / ATCC 38163 / CBS 112.46 / NRRL 194 / M139) GN=bglA PE=3 SV=2	91.59	GFDKLVIQPGEER		missed K-L@4	-0.0477774	1486.73	496.584	1486.78	496.6	3	10	1.1.1.342.4	1	22.8487	0	-1
2	21.09	sp|Q5B5S8|BGLA_EMENI	Probable beta-glucosidase A OS=Emericella nidulans (strain FGSC A4 / ATCC 38163 / CBS 112.46 / NRRL 194 / M139) GN=bglA PE=3 SV=2	99	GIQDAGVIATAK			0.346266	1142.98	572.495	1142.63	572.322	2	12	1.1.1.315.3	1	20.1461	0	-1
2	21.09	sp|Q5B5S8|BGLA_EMENI	Probable beta-glucosidase A OS=Emericella nidulans (strain FGSC A4 / ATCC 38163 / CBS 112.46 / NRRL 194 / M139) GN=bglA PE=3 SV=2	99	GIQDAGVIATAK			0.334669	1142.96	572.489	1142.63	572.322	2	12	1.1.1.314.3	1	20.0435	0	-1
2	21.09	sp|Q5B5S8|BGLA_EMENI	Probable beta-glucosidase A OS=Emericella nidulans (strain FGSC A4 / ATCC 38163 / CBS 112.46 / NRRL 194 / M139) GN=bglA PE=3 SV=2	73.37	GIQDAGVIATAK			-0.082689	1142.55	572.281	1142.63	572.322	2	7	1.1.1.317.4	1	20.3514	0	-1
2	21.09	sp|Q5B5S8|BGLA_EMENI	Probable beta-glucosidase A OS=Emericella nidulans (strain FGSC A4 / ATCC 38163 / CBS 112.46 / NRRL 194 / M139) GN=bglA PE=3 SV=2	99	HYLLNEQEHFR	Deamidated(N)@5		-0.592634	1485.11	496.043	1485.7	496.241	3	16	1.1.1.324.3	1	21.0007	0	-1
2	21.09	sp|Q5B5S8|BGLA_EMENI	Probable beta-glucosidase A OS=Emericella nidulans (strain FGSC A4 / ATCC 38163 / CBS 112.46 / NRRL 194 / M139) GN=bglA PE=3 SV=2	99	HYLLNEQEHFR			0.320886	1485.04	496.02	1484.72	495.913	3	15	1.1.1.319.3	1	20.4872	0	-1
2	21.09	sp|Q5B5S8|BGLA_EMENI	Probable beta-glucosidase A OS=Emericella nidulans (strain FGSC A4 / ATCC 38163 / CBS 112.46 / NRRL 194 / M139) GN=bglA PE=3 SV=2	98.93	HYLLNEQEHFR			-0.0562194	1484.66	495.894	1484.72	495.913	3	12	1.1.1.323.4	1	20.9327	0	-1
2	21.09	sp|Q5B5S8|BGLA_EMENI	Probable beta-glucosidase A OS=Emericella nidulans (strain FGSC A4 / ATCC 38163 / CBS 112.46 / NRRL 194 / M139) GN=bglA PE=3 SV=2	97.24	HYLLNEQEHFR			0.369776	1485.09	496.036	1484.72	495.913	3	11	1.1.1.322.3	1	20.7953	0	-1
2	21.09	sp|Q5B5S8|BGLA_EMENI	Probable beta-glucosidase A OS=Emericella nidulans (strain FGSC A4 / ATCC 38163 / CBS 112.46 / NRRL 194 / M139) GN=bglA PE=3 SV=2	90.95	HYLLNEQEHFR	Methyl(E)@8		0.406463	1499.14	500.72	1498.73	500.585	3	12	1.1.1.333.3	1	21.8899	0	-1
2	21.09	sp|Q5B5S8|BGLA_EMENI	Probable beta-glucosidase A OS=Emericella nidulans (strain FGSC A4 / ATCC 38163 / CBS 112.46 / NRRL 194 / M139) GN=bglA PE=3 SV=2	76.92	HYLLNEQEHFR	Methyl(E)@8		0.391174	1499.12	500.715	1498.73	500.585	3	12	1.1.1.332.3	1	21.7873	0	-1
2	21.09	sp|Q5B5S8|BGLA_EMENI	Probable beta-glucosidase A OS=Emericella nidulans (strain FGSC A4 / ATCC 38163 / CBS 112.46 / NRRL 194 / M139) GN=bglA PE=3 SV=2	42.48	HYLLNEQEHFR			0.344599	1485.06	496.027	1484.72	495.913	3	10	1.1.1.317.3	1	20.3167	0	-1
2	21.09	sp|Q5B5S8|BGLA_EMENI	Probable beta-glucosidase A OS=Emericella nidulans (strain FGSC A4 / ATCC 38163 / CBS 112.46 / NRRL 194 / M139) GN=bglA PE=3 SV=2	99	LGINSICLQDGPLGIR	Carbamidomethyl(C)@7		-2.53272	1722.39	575.138	1724.92	575.982	3	12	1.1.1.404.3	1	29.0407	0	-1
2	21.09	sp|Q5B5S8|BGLA_EMENI	Probable beta-glucosidase A OS=Emericella nidulans (strain FGSC A4 / ATCC 38163 / CBS 112.46 / NRRL 194 / M139) GN=bglA PE=3 SV=2	99	LNAPAYSPASGQTK			0.203561	1403.91	702.961	1403.7	702.859	2	8	1.1.1.303.3	1	18.9494	0	-1
2	21.09	sp|Q5B5S8|BGLA_EMENI	Probable beta-glucosidase A OS=Emericella nidulans (strain FGSC A4 / ATCC 38163 / CBS 112.46 / NRRL 194 / M139) GN=bglA PE=3 SV=2	86.68	LYDDLFR			0.307429	940.773	471.394	940.465	471.24	2	10	1.1.1.372.3	1	25.8598	0	-1
2	21.09	sp|Q5B5S8|BGLA_EMENI	Probable beta-glucosidase A OS=Emericella nidulans (strain FGSC A4 / ATCC 38163 / CBS 112.46 / NRRL 194 / M139) GN=bglA PE=3 SV=2	80.91	LYDDLFR			0.257442	940.723	471.369	940.465	471.24	2	8	1.1.1.378.3	1	26.476	0	-1
2	21.09	sp|Q5B5S8|BGLA_EMENI	Probable beta-glucosidase A OS=Emericella nidulans (strain FGSC A4 / ATCC 38163 / CBS 112.46 / NRRL 194 / M139) GN=bglA PE=3 SV=2	80.55	LYDDLFR			0.303218	940.769	471.392	940.465	471.24	2	8	1.1.1.376.3	1	26.2706	0	-1
2	21.09	sp|Q5B5S8|BGLA_EMENI	Probable beta-glucosidase A OS=Emericella nidulans (strain FGSC A4 / ATCC 38163 / CBS 112.46 / NRRL 194 / M139) GN=bglA PE=3 SV=2	23.46	LYDDLFR			0.306819	940.772	471.393	940.465	471.24	2	6	1.1.1.377.3	1	26.3732	0	-1
2	21.09	sp|Q5B5S8|BGLA_EMENI	Probable beta-glucosidase A OS=Emericella nidulans (strain FGSC A4 / ATCC 38163 / CBS 112.46 / NRRL 194 / M139) GN=bglA PE=3 SV=2	99	RVGADSIVLLKNEGSLPLTGKER		missed R-V@1; missed K-N@11; missed K-E@21	0.0372383	2451.42	613.862	2451.38	613.852	4	15	1.1.1.358.4	1	24.4565	0	-1
2	21.09	sp|Q5B5S8|BGLA_EMENI	Probable beta-glucosidase A OS=Emericella nidulans (strain FGSC A4 / ATCC 38163 / CBS 112.46 / NRRL 194 / M139) GN=bglA PE=3 SV=2	99	RVGADSIVLLKNEGSLPLTGKER		missed R-V@1; missed K-N@11; missed K-E@21	2.81605	2454.2	614.557	2451.38	613.852	4	15	1.1.1.357.3	1	24.3189	0	-1
2	21.09	sp|Q5B5S8|BGLA_EMENI	Probable beta-glucosidase A OS=Emericella nidulans (strain FGSC A4 / ATCC 38163 / CBS 112.46 / NRRL 194 / M139) GN=bglA PE=3 SV=2	49.8	VGADSIVLLK			0.37097	1013.98	507.999	1013.61	507.813	2	7	1.1.1.362.3	1	24.8326	0	-1
2	21.09	sp|Q5B5S8|BGLA_EMENI	Probable beta-glucosidase A OS=Emericella nidulans (strain FGSC A4 / ATCC 38163 / CBS 112.46 / NRRL 194 / M139) GN=bglA PE=3 SV=2	27.71	VGADSIVLLKNEGSLPLTGKER		missed K-N@10; missed K-E@20	0.944258	2296.22	575.063	2295.28	574.827	4	12	1.1.1.371.3	1	25.7571	0	-1
3	11.26	sp|Q5B9F2|BGLL_EMENI	Probable beta-glucosidase L OS=Emericella nidulans (strain FGSC A4 / ATCC 38163 / CBS 112.46 / NRRL 194 / M139) GN=bglL PE=3 SV=1	99	ATSDLSLLSQEEK			0.00454481	1419.71	710.864	1419.71	710.862	2	15	1.1.1.376.3	1	23.3045	0	-1
3	11.26	sp|Q5B9F2|BGLL_EMENI	Probable beta-glucosidase L OS=Emericella nidulans (strain FGSC A4 / ATCC 38163 / CBS 112.46 / NRRL 194 / M139) GN=bglL PE=3 SV=1	99	FANPVTVFPAGINAGATWDR			-0.0417695	2103.01	702.011	2103.05	702.025	3	18	1.1.1.440.4	1	29.6695	0	-1
3	11.26	sp|Q5B9F2|BGLL_EMENI	Probable beta-glucosidase L OS=Emericella nidulans (strain FGSC A4 / ATCC 38163 / CBS 112.46 / NRRL 194 / M139) GN=bglL PE=3 SV=1	99	GLGVHVQLGPVAGALGK			-0.61495	1571.3	524.774	1571.91	524.979	3	12	1.1.1.439.3	1	29.532	0	-1
3	11.26	sp|Q5B9F2|BGLL_EMENI	Probable beta-glucosidase L OS=Emericella nidulans (strain FGSC A4 / ATCC 38163 / CBS 112.46 / NRRL 194 / M139) GN=bglL PE=3 SV=1	99	GLGVHVQLGPVAGALGKIPSAGR	Deamidated(Q)@7	missed K-I@17	-1.23279	2152.99	539.256	2154.23	539.564	4	19	1.1.1.422.4	1	27.9253	0	-1
3	11.26	sp|Q5B9F2|BGLL_EMENI	Probable beta-glucosidase L OS=Emericella nidulans (strain FGSC A4 / ATCC 38163 / CBS 112.46 / NRRL 194 / M139) GN=bglL PE=3 SV=1	99	HYLLNEQEYNR			0.0467682	1477.74	493.588	1477.69	493.572	3	14	1.1.1.344.3	1	20.2605	0	-1
3	11.26	sp|Q5B9F2|BGLL_EMENI	Probable beta-glucosidase L OS=Emericella nidulans (strain FGSC A4 / ATCC 38163 / CBS 112.46 / NRRL 194 / M139) GN=bglL PE=3 SV=1	95.47	GVAMGAESR	Dioxidation(M)@4		0.285203	908.688	455.351	908.402	455.208	2	10	1.1.1.294.3	1	15.5429	0	-1
3	11.26	sp|Q5B9F2|BGLL_EMENI	Probable beta-glucosidase L OS=Emericella nidulans (strain FGSC A4 / ATCC 38163 / CBS 112.46 / NRRL 194 / M139) GN=bglL PE=3 SV=1	99	ATSDLSLLSQEEK			0.0292007	1419.74	710.876	1419.71	710.862	2	14	1.1.1.375.3	1	23.2018	0	-1
3	11.26	sp|Q5B9F2|BGLL_EMENI	Probable beta-glucosidase L OS=Emericella nidulans (strain FGSC A4 / ATCC 38163 / CBS 112.46 / NRRL 194 / M139) GN=bglL PE=3 SV=1	85.39	ATSDLSLLSQEEK			0.038111	1419.75	710.881	1419.71	710.862	2	9	1.1.1.374.3	1	23.0991	0	-1
3	11.26	sp|Q5B9F2|BGLL_EMENI	Probable beta-glucosidase L OS=Emericella nidulans (strain FGSC A4 / ATCC 38163 / CBS 112.46 / NRRL 194 / M139) GN=bglL PE=3 SV=1	99	GLGVHVQLGPVAGALGK			-0.74714	1571.17	524.73	1571.91	524.979	3	19	1.1.1.404.3	1	26.1109	0	-1
3	11.26	sp|Q5B9F2|BGLL_EMENI	Probable beta-glucosidase L OS=Emericella nidulans (strain FGSC A4 / ATCC 38163 / CBS 112.46 / NRRL 194 / M139) GN=bglL PE=3 SV=1	99	GLGVHVQLGPVAGALGK			0.0945166	1572.01	525.01	1571.91	524.979	3	14	1.1.1.445.3	1	30.0786	0	-1
3	11.26	sp|Q5B9F2|BGLL_EMENI	Probable beta-glucosidase L OS=Emericella nidulans (strain FGSC A4 / ATCC 38163 / CBS 112.46 / NRRL 194 / M139) GN=bglL PE=3 SV=1	99	GLGVHVQLGPVAGALGK			0.508845	1572.42	525.149	1571.91	524.979	3	16	1.1.1.405.3	1	26.2137	0	-1
3	11.26	sp|Q5B9F2|BGLL_EMENI	Probable beta-glucosidase L OS=Emericella nidulans (strain FGSC A4 / ATCC 38163 / CBS 112.46 / NRRL 194 / M139) GN=bglL PE=3 SV=1	99	GLGVHVQLGPVAGALGK			0.329968	1572.24	525.089	1571.91	524.979	3	16	1.1.1.408.3	1	26.4871	0	-1
3	11.26	sp|Q5B9F2|BGLL_EMENI	Probable beta-glucosidase L OS=Emericella nidulans (strain FGSC A4 / ATCC 38163 / CBS 112.46 / NRRL 194 / M139) GN=bglL PE=3 SV=1	99	GLGVHVQLGPVAGALGK	Deamidated(Q)@7		0.481099	1573.38	525.467	1572.9	525.307	3	16	1.1.1.410.3	1	26.6926	0	-1
3	11.26	sp|Q5B9F2|BGLL_EMENI	Probable beta-glucosidase L OS=Emericella nidulans (strain FGSC A4 / ATCC 38163 / CBS 112.46 / NRRL 194 / M139) GN=bglL PE=3 SV=1	99	GLGVHVQLGPVAGALGK			-0.336473	1571.58	524.867	1571.91	524.979	3	14	1.1.1.420.4	1	27.7198	0	-1
3	11.26	sp|Q5B9F2|BGLL_EMENI	Probable beta-glucosidase L OS=Emericella nidulans (strain FGSC A4 / ATCC 38163 / CBS 112.46 / NRRL 194 / M139) GN=bglL PE=3 SV=1	99	GLGVHVQLGPVAGALGK			-0.27111	1571.64	524.889	1571.91	524.979	3	13	1.1.1.398.4	1	25.5637	0	-1
3	11.26	sp|Q5B9F2|BGLL_EMENI	Probable beta-glucosidase L OS=Emericella nidulans (strain FGSC A4 / ATCC 38163 / CBS 112.46 / NRRL 194 / M139) GN=bglL PE=3 SV=1	99	GLGVHVQLGPVAGALGK			0.264605	1572.18	525.067	1571.91	524.979	3	15	1.1.1.402.3	1	25.9053	0	-1
3	11.26	sp|Q5B9F2|BGLL_EMENI	Probable beta-glucosidase L OS=Emericella nidulans (strain FGSC A4 / ATCC 38163 / CBS 112.46 / NRRL 194 / M139) GN=bglL PE=3 SV=1	99	GLGVHVQLGPVAGALGK			-0.713635	1571.2	524.741	1571.91	524.979	3	15	1.1.1.400.3	1	25.7345	0	-1
3	11.26	sp|Q5B9F2|BGLL_EMENI	Probable beta-glucosidase L OS=Emericella nidulans (strain FGSC A4 / ATCC 38163 / CBS 112.46 / NRRL 194 / M139) GN=bglL PE=3 SV=1	99	GLGVHVQLGPVAGALGK			0.31587	1572.23	525.084	1571.91	524.979	3	12	1.1.1.425.3	1	28.1985	0	-1
3	11.26	sp|Q5B9F2|BGLL_EMENI	Probable beta-glucosidase L OS=Emericella nidulans (strain FGSC A4 / ATCC 38163 / CBS 112.46 / NRRL 194 / M139) GN=bglL PE=3 SV=1	99	GLGVHVQLGPVAGALGK	Deamidated(Q)@7		0.605965	1573.5	525.509	1572.9	525.307	3	13	1.1.1.411.3	1	26.7952	0	-1
3	11.26	sp|Q5B9F2|BGLL_EMENI	Probable beta-glucosidase L OS=Emericella nidulans (strain FGSC A4 / ATCC 38163 / CBS 112.46 / NRRL 194 / M139) GN=bglL PE=3 SV=1	99	GLGVHVQLGPVAGALGK			0.21389	1572.13	525.05	1571.91	524.979	3	10	1.1.1.505.3	1	35.5375	0	-1
3	11.26	sp|Q5B9F2|BGLL_EMENI	Probable beta-glucosidase L OS=Emericella nidulans (strain FGSC A4 / ATCC 38163 / CBS 112.46 / NRRL 194 / M139) GN=bglL PE=3 SV=1	99	GLGVHVQLGPVAGALGK			-0.24383	1571.67	524.898	1571.91	524.979	3	12	1.1.1.417.4	1	27.4115	0	-1
3	11.26	sp|Q5B9F2|BGLL_EMENI	Probable beta-glucosidase L OS=Emericella nidulans (strain FGSC A4 / ATCC 38163 / CBS 112.46 / NRRL 194 / M139) GN=bglL PE=3 SV=1	98.94	GLGVHVQLGPVAGALGK			0.320447	1572.24	525.086	1571.91	524.979	3	12	1.1.1.423.3	1	27.993	0	-1
3	11.26	sp|Q5B9F2|BGLL_EMENI	Probable beta-glucosidase L OS=Emericella nidulans (strain FGSC A4 / ATCC 38163 / CBS 112.46 / NRRL 194 / M139) GN=bglL PE=3 SV=1	98.89	GLGVHVQLGPVAGALGK			0.234945	1572.15	525.057	1571.91	524.979	3	11	1.1.1.469.3	1	32.0543	0	-1
3	11.26	sp|Q5B9F2|BGLL_EMENI	Probable beta-glucosidase L OS=Emericella nidulans (strain FGSC A4 / ATCC 38163 / CBS 112.46 / NRRL 194 / M139) GN=bglL PE=3 SV=1	98.87	GLGVHVQLGPVAGALGK			0.276872	1572.19	525.071	1571.91	524.979	3	11	1.1.1.446.3	1	30.1813	0	-1
3	11.26	sp|Q5B9F2|BGLL_EMENI	Probable beta-glucosidase L OS=Emericella nidulans (strain FGSC A4 / ATCC 38163 / CBS 112.46 / NRRL 194 / M139) GN=bglL PE=3 SV=1	98.83	GLGVHVQLGPVAGALGK	Deamidated(Q)@7		-0.308377	1572.59	525.204	1572.9	525.307	3	14	1.1.1.409.3	1	26.5899	0	-1
3	11.26	sp|Q5B9F2|BGLL_EMENI	Probable beta-glucosidase L OS=Emericella nidulans (strain FGSC A4 / ATCC 38163 / CBS 112.46 / NRRL 194 / M139) GN=bglL PE=3 SV=1	97.34	GLGVHVQLGPVAGALGK	Deamidated(Q)@7		-0.678032	1572.22	525.081	1572.9	525.307	3	13	1.1.1.443.3	1	29.8733	0	-1
3	11.26	sp|Q5B9F2|BGLL_EMENI	Probable beta-glucosidase L OS=Emericella nidulans (strain FGSC A4 / ATCC 38163 / CBS 112.46 / NRRL 194 / M139) GN=bglL PE=3 SV=1	96.41	GLGVHVQLGPVAGALGK			0.208764	1572.12	525.048	1571.91	524.979	3	9	1.1.1.479.3	1	33.0102	0	-1
3	11.26	sp|Q5B9F2|BGLL_EMENI	Probable beta-glucosidase L OS=Emericella nidulans (strain FGSC A4 / ATCC 38163 / CBS 112.46 / NRRL 194 / M139) GN=bglL PE=3 SV=1	96.36	GLGVHVQLGPVAGALGK			0.199243	1572.11	525.045	1571.91	524.979	3	12	1.1.1.432.3	1	28.8826	0	-1
3	11.26	sp|Q5B9F2|BGLL_EMENI	Probable beta-glucosidase L OS=Emericella nidulans (strain FGSC A4 / ATCC 38163 / CBS 112.46 / NRRL 194 / M139) GN=bglL PE=3 SV=1	94.46	GLGVHVQLGPVAGALGK	Deamidated(Q)@7		-0.285857	1572.61	525.212	1572.9	525.307	3	13	1.1.1.399.3	1	25.6317	0	-1
3	11.26	sp|Q5B9F2|BGLL_EMENI	Probable beta-glucosidase L OS=Emericella nidulans (strain FGSC A4 / ATCC 38163 / CBS 112.46 / NRRL 194 / M139) GN=bglL PE=3 SV=1	94.01	GLGVHVQLGPVAGALGK			0.293167	1572.21	525.077	1571.91	524.979	3	11	1.1.1.434.3	1	29.0533	0	-1
3	11.26	sp|Q5B9F2|BGLL_EMENI	Probable beta-glucosidase L OS=Emericella nidulans (strain FGSC A4 / ATCC 38163 / CBS 112.46 / NRRL 194 / M139) GN=bglL PE=3 SV=1	92.49	GLGVHVQLGPVAGALGK	Deamidated(Q)@7		-0.788617	1572.11	525.044	1572.9	525.307	3	12	1.1.1.430.3	1	28.6772	0	-1
3	11.26	sp|Q5B9F2|BGLL_EMENI	Probable beta-glucosidase L OS=Emericella nidulans (strain FGSC A4 / ATCC 38163 / CBS 112.46 / NRRL 194 / M139) GN=bglL PE=3 SV=1	79.65	GLGVHVQLGPVAGALGK			0.85653	1572.77	525.264	1571.91	524.979	3	9	1.1.1.459.3	1	31.0985	0	-1
3	11.26	sp|Q5B9F2|BGLL_EMENI	Probable beta-glucosidase L OS=Emericella nidulans (strain FGSC A4 / ATCC 38163 / CBS 112.46 / NRRL 194 / M139) GN=bglL PE=3 SV=1	77.74	GLGVHVQLGPVAGALGK			0.480833	1572.4	525.139	1571.91	524.979	3	12	1.1.1.406.3	1	26.3164	0	-1
3	11.26	sp|Q5B9F2|BGLL_EMENI	Probable beta-glucosidase L OS=Emericella nidulans (strain FGSC A4 / ATCC 38163 / CBS 112.46 / NRRL 194 / M139) GN=bglL PE=3 SV=1	99	GLGVHVQLGPVAGALGKIPSAGR		missed K-I@17	-0.137944	2153.11	539.284	2153.24	539.318	4	15	1.1.1.418.4	1	27.5142	0	-1
3	11.26	sp|Q5B9F2|BGLL_EMENI	Probable beta-glucosidase L OS=Emericella nidulans (strain FGSC A4 / ATCC 38163 / CBS 112.46 / NRRL 194 / M139) GN=bglL PE=3 SV=1	99	GLGVHVQLGPVAGALGKIPSAGR		missed K-I@17	-0.24267	2153	539.257	2153.24	539.318	4	14	1.1.1.419.4	1	27.617	0	-1
3	11.26	sp|Q5B9F2|BGLL_EMENI	Probable beta-glucosidase L OS=Emericella nidulans (strain FGSC A4 / ATCC 38163 / CBS 112.46 / NRRL 194 / M139) GN=bglL PE=3 SV=1	99	GLGVHVQLGPVAGALGKIPSAGR		missed K-I@17	-0.742135	2152.5	539.133	2153.24	539.318	4	14	1.1.1.414.3	1	27.1036	0	-1
3	11.26	sp|Q5B9F2|BGLL_EMENI	Probable beta-glucosidase L OS=Emericella nidulans (strain FGSC A4 / ATCC 38163 / CBS 112.46 / NRRL 194 / M139) GN=bglL PE=3 SV=1	49	GLGVHVQLGPVAGALGKIPSAGR		missed K-I@17	-0.399882	2152.84	539.218	2153.24	539.318	4	10	1.1.1.429.4	1	28.6092	0	-1
3	11.26	sp|Q5B9F2|BGLL_EMENI	Probable beta-glucosidase L OS=Emericella nidulans (strain FGSC A4 / ATCC 38163 / CBS 112.46 / NRRL 194 / M139) GN=bglL PE=3 SV=1	42.71	GLGVHVQLGPVAGALGKIPSAGR		missed K-I@17	0.148895	2153.39	539.355	2153.24	539.318	4	12	1.1.1.413.4	1	27.0355	0	-1
3	11.26	sp|Q5B9F2|BGLL_EMENI	Probable beta-glucosidase L OS=Emericella nidulans (strain FGSC A4 / ATCC 38163 / CBS 112.46 / NRRL 194 / M139) GN=bglL PE=3 SV=1	37.09	GLGVHVQLGPVAGALGKIPSAGR	Deamidated(Q)@7	missed K-I@17	-0.841468	2153.39	539.354	2154.23	539.564	4	12	1.1.1.415.3	1	27.2063	0	-1
3	11.26	sp|Q5B9F2|BGLL_EMENI	Probable beta-glucosidase L OS=Emericella nidulans (strain FGSC A4 / ATCC 38163 / CBS 112.46 / NRRL 194 / M139) GN=bglL PE=3 SV=1	58.91	GVAMGAESR	Oxidation(M)@4; Methyl(E)@7		0.150837	906.574	454.294	906.423	454.219	2	9	1.1.1.302.3	1	16.2601	0	-1
3	11.26	sp|Q5B9F2|BGLL_EMENI	Probable beta-glucosidase L OS=Emericella nidulans (strain FGSC A4 / ATCC 38163 / CBS 112.46 / NRRL 194 / M139) GN=bglL PE=3 SV=1	99	HYLLNEQEYNR			-0.282607	1477.41	493.478	1477.69	493.572	3	13	1.1.1.348.3	1	20.5675	0	-1
3	11.26	sp|Q5B9F2|BGLL_EMENI	Probable beta-glucosidase L OS=Emericella nidulans (strain FGSC A4 / ATCC 38163 / CBS 112.46 / NRRL 194 / M139) GN=bglL PE=3 SV=1	99	HYLLNEQEYNR			0.00172852	1477.7	493.573	1477.69	493.572	3	14	1.1.1.345.3	1	20.3286	0	-1
3	11.26	sp|Q5B9F2|BGLL_EMENI	Probable beta-glucosidase L OS=Emericella nidulans (strain FGSC A4 / ATCC 38163 / CBS 112.46 / NRRL 194 / M139) GN=bglL PE=3 SV=1	99	HYLLNEQEYNR			-1.4324	1476.26	493.095	1477.69	493.572	3	13	1.1.1.342.3	1	20.0894	0	-1
3	11.26	sp|Q5B9F2|BGLL_EMENI	Probable beta-glucosidase L OS=Emericella nidulans (strain FGSC A4 / ATCC 38163 / CBS 112.46 / NRRL 194 / M139) GN=bglL PE=3 SV=1	97.55	HYLLNEQEYNR			-0.0870692	1477.61	493.543	1477.69	493.572	3	13	1.1.1.346.3	1	20.3968	0	-1
3	11.26	sp|Q5B9F2|BGLL_EMENI	Probable beta-glucosidase L OS=Emericella nidulans (strain FGSC A4 / ATCC 38163 / CBS 112.46 / NRRL 194 / M139) GN=bglL PE=3 SV=1	93.04	HYLLNEQEYNR			-2.02396	1475.67	492.898	1477.69	493.572	3	9	1.1.1.353.3	1	21.0118	0	-1
3	11.26	sp|Q5B9F2|BGLL_EMENI	Probable beta-glucosidase L OS=Emericella nidulans (strain FGSC A4 / ATCC 38163 / CBS 112.46 / NRRL 194 / M139) GN=bglL PE=3 SV=1	67.86	HYLLNEQEYNR			-2.01105	1475.68	492.902	1477.69	493.572	3	8	1.1.1.351.3	1	20.8411	0	-1
3	11.26	sp|Q5B9F2|BGLL_EMENI	Probable beta-glucosidase L OS=Emericella nidulans (strain FGSC A4 / ATCC 38163 / CBS 112.46 / NRRL 194 / M139) GN=bglL PE=3 SV=1	53.78	HYLLNEQEYNR			0.676042	1478.37	493.798	1477.69	493.572	3	9	1.1.1.371.3	1	22.8258	0	-1
3	11.26	sp|Q5B9F2|BGLL_EMENI	Probable beta-glucosidase L OS=Emericella nidulans (strain FGSC A4 / ATCC 38163 / CBS 112.46 / NRRL 194 / M139) GN=bglL PE=3 SV=1	21.22	HYLLNEQEYNR			-1.84938	1475.85	492.956	1477.69	493.572	3	8	1.1.1.383.3	1	24.0233	0	-1
3	11.26	sp|Q5B9F2|BGLL_EMENI	Probable beta-glucosidase L OS=Emericella nidulans (strain FGSC A4 / ATCC 38163 / CBS 112.46 / NRRL 194 / M139) GN=bglL PE=3 SV=1	21.14	HYLLNEQEYNR			-0.31776	1477.38	493.466	1477.69	493.572	3	8	1.1.1.359.4	1	21.663	0	-1
4	25.48	sp|P78619|CATB_EMENI	Catalase B OS=Emericella nidulans (strain FGSC A4 / ATCC 38163 / CBS 112.46 / NRRL 194 / M139) GN=catB PE=2 SV=2	99	DVHGFATR			0.206136	901.647	451.831	901.441	451.728	2	11	1.1.1.328.3	0	18.4065	0	-1
4	25.48	sp|P78619|CATB_EMENI	Catalase B OS=Emericella nidulans (strain FGSC A4 / ATCC 38163 / CBS 112.46 / NRRL 194 / M139) GN=catB PE=2 SV=2	99	FGFDLFDPTK			-0.0536279	1185.52	593.766	1185.57	593.793	2	14	1.1.1.479.4	0	31.223	0	-1
4	25.48	sp|P78619|CATB_EMENI	Catalase B OS=Emericella nidulans (strain FGSC A4 / ATCC 38163 / CBS 112.46 / NRRL 194 / M139) GN=catB PE=2 SV=2	99	FLDRFALDSDE		missed R-F@4	-0.0529998	1326.56	664.285	1326.61	664.312	2	16	1.1.1.406.4	1	25.442	0	-1
4	25.48	sp|P78619|CATB_EMENI	Catalase B OS=Emericella nidulans (strain FGSC A4 / ATCC 38163 / CBS 112.46 / NRRL 194 / M139) GN=catB PE=2 SV=2	99	GSTLLEDFIFR			1.0255	1297.7	649.856	1296.67	649.343	2	15	1.1.1.502.3	1	33.1623	0	-1
4	25.48	sp|P78619|CATB_EMENI	Catalase B OS=Emericella nidulans (strain FGSC A4 / ATCC 38163 / CBS 112.46 / NRRL 194 / M139) GN=catB PE=2 SV=2	99	NNVIVQLNR			-0.103511	1068.5	535.258	1068.6	535.309	2	13	1.1.1.360.3	1	21.2762	0	-1
4	25.48	sp|P78619|CATB_EMENI	Catalase B OS=Emericella nidulans (strain FGSC A4 / ATCC 38163 / CBS 112.46 / NRRL 194 / M139) GN=catB PE=2 SV=2	98.48	SDVVKNNVIVQLNR		missed K-N@5	0.118238	1597.01	533.345	1596.89	533.306	3	14	1.1.1.367.4	1	21.9603	0	-1
4	25.48	sp|P78619|CATB_EMENI	Catalase B OS=Emericella nidulans (strain FGSC A4 / ATCC 38163 / CBS 112.46 / NRRL 194 / M139) GN=catB PE=2 SV=2	97.67	AKSSTFDDAWSQPR		missed K-S@2	-0.00331488	1594.73	532.585	1594.74	532.586	3	13	1.1.1.361.4	1	21.3789	0	-1
4	25.48	sp|P78619|CATB_EMENI	Catalase B OS=Emericella nidulans (strain FGSC A4 / ATCC 38163 / CBS 112.46 / NRRL 194 / M139) GN=catB PE=2 SV=2	91.81	LVTEDGSTK			0.198461	948.675	475.345	948.476	475.245	2	9	1.1.1.307.3	1	16.4231	0	-1
4	25.48	sp|P78619|CATB_EMENI	Catalase B OS=Emericella nidulans (strain FGSC A4 / ATCC 38163 / CBS 112.46 / NRRL 194 / M139) GN=catB PE=2 SV=2	91.63	GSSDLARDVHGFATR		missed R-D@7	0.169611	1587.95	530.322	1587.78	530.266	3	12	1.1.1.360.4	0	21.3109	0	-1
4	25.48	sp|P78619|CATB_EMENI	Catalase B OS=Emericella nidulans (strain FGSC A4 / ATCC 38163 / CBS 112.46 / NRRL 194 / M139) GN=catB PE=2 SV=2	81.03	GFFTAPDR			-0.524003	908.91	455.462	909.434	455.725	2	9	1.1.1.379.3	1	23.0883	0	-1
4	25.48	sp|P78619|CATB_EMENI	Catalase B OS=Emericella nidulans (strain FGSC A4 / ATCC 38163 / CBS 112.46 / NRRL 194 / M139) GN=catB PE=2 SV=2	77.3	FDHERVPER		missed R-V@5	0.0250204	1183.6	592.807	1183.57	592.794	2	8	1.1.1.312.3	0	16.9362	0	-1
4	25.48	sp|P78619|CATB_EMENI	Catalase B OS=Emericella nidulans (strain FGSC A4 / ATCC 38163 / CBS 112.46 / NRRL 194 / M139) GN=catB PE=2 SV=2	90.66	GFFTAPDRTANGNLVR	Deamidated(N)@11	missed R-T@8	-0.50703	1735.36	579.46	1735.86	579.629	3	13	1.1.1.389.3	1	23.976	0	-1
4	25.48	sp|P78619|CATB_EMENI	Catalase B OS=Emericella nidulans (strain FGSC A4 / ATCC 38163 / CBS 112.46 / NRRL 194 / M139) GN=catB PE=2 SV=2	37	VAIHNNNR			-0.0251557	936.464	469.239	936.489	469.252	2	6	1.1.1.295.3	1	15.1915	0	-1
4	25.48	sp|P78619|CATB_EMENI	Catalase B OS=Emericella nidulans (strain FGSC A4 / ATCC 38163 / CBS 112.46 / NRRL 194 / M139) GN=catB PE=2 SV=2	76.03	AKSSTFDDAWSQPR		missed K-S@2	0.0501513	1594.79	532.603	1594.74	532.586	3	11	1.1.1.364.4	1	21.6872	0	-1
4	25.48	sp|P78619|CATB_EMENI	Catalase B OS=Emericella nidulans (strain FGSC A4 / ATCC 38163 / CBS 112.46 / NRRL 194 / M139) GN=catB PE=2 SV=2	95.83	DVHGFATR			0.215169	901.656	451.835	901.441	451.728	2	10	1.1.1.324.3	0	18.0302	0	-1
4	25.48	sp|P78619|CATB_EMENI	Catalase B OS=Emericella nidulans (strain FGSC A4 / ATCC 38163 / CBS 112.46 / NRRL 194 / M139) GN=catB PE=2 SV=2	82.96	DVHGFATR			0.229573	901.67	451.842	901.441	451.728	2	8	1.1.1.325.3	0	18.0983	0	-1
4	25.48	sp|P78619|CATB_EMENI	Catalase B OS=Emericella nidulans (strain FGSC A4 / ATCC 38163 / CBS 112.46 / NRRL 194 / M139) GN=catB PE=2 SV=2	58.04	DVHGFATR			0.101584	901.542	451.778	901.441	451.728	2	7	1.1.1.330.3	0	18.6118	0	-1
4	25.48	sp|P78619|CATB_EMENI	Catalase B OS=Emericella nidulans (strain FGSC A4 / ATCC 38163 / CBS 112.46 / NRRL 194 / M139) GN=catB PE=2 SV=2	34.1	DVHGFATR			0.176168	901.617	451.816	901.441	451.728	2	7	1.1.1.326.3	0	18.2011	0	-1
4	25.48	sp|P78619|CATB_EMENI	Catalase B OS=Emericella nidulans (strain FGSC A4 / ATCC 38163 / CBS 112.46 / NRRL 194 / M139) GN=catB PE=2 SV=2	99	FGFDLFDPTK			-0.0405666	1185.53	593.772	1185.57	593.793	2	14	1.1.1.478.4	0	31.1553	0	-1
4	25.48	sp|P78619|CATB_EMENI	Catalase B OS=Emericella nidulans (strain FGSC A4 / ATCC 38163 / CBS 112.46 / NRRL 194 / M139) GN=catB PE=2 SV=2	99	FGFDLFDPTK			-0.0981831	1185.47	593.744	1185.57	593.793	2	13	1.1.1.480.4	0	31.2908	0	-1
4	25.48	sp|P78619|CATB_EMENI	Catalase B OS=Emericella nidulans (strain FGSC A4 / ATCC 38163 / CBS 112.46 / NRRL 194 / M139) GN=catB PE=2 SV=2	99	FLDRFALDSDE		missed R-F@4	0.164893	1326.77	664.394	1326.61	664.312	2	17	1.1.1.408.3	1	25.5776	0	-1
4	25.48	sp|P78619|CATB_EMENI	Catalase B OS=Emericella nidulans (strain FGSC A4 / ATCC 38163 / CBS 112.46 / NRRL 194 / M139) GN=catB PE=2 SV=2	99	FLDRFALDSDE		missed R-F@4	-0.0436005	1326.57	664.29	1326.61	664.312	2	13	1.1.1.411.4	1	25.8159	0	-1
4	25.48	sp|P78619|CATB_EMENI	Catalase B OS=Emericella nidulans (strain FGSC A4 / ATCC 38163 / CBS 112.46 / NRRL 194 / M139) GN=catB PE=2 SV=2	78.42	GFFTAPDR			-0.137411	909.297	455.656	909.434	455.725	2	9	1.1.1.377.3	1	22.8829	0	-1
4	25.48	sp|P78619|CATB_EMENI	Catalase B OS=Emericella nidulans (strain FGSC A4 / ATCC 38163 / CBS 112.46 / NRRL 194 / M139) GN=catB PE=2 SV=2	63.97	GFFTAPDR			-0.214802	909.22	455.617	909.434	455.725	2	9	1.1.1.378.3	1	22.9856	0	-1
4	25.48	sp|P78619|CATB_EMENI	Catalase B OS=Emericella nidulans (strain FGSC A4 / ATCC 38163 / CBS 112.46 / NRRL 194 / M139) GN=catB PE=2 SV=2	38.41	GFFTAPDRTANGNLVR	Deamidated(N)@11; Deamidated(R)@16	missed R-T@8	1.10152	1737.95	580.324	1736.85	579.957	3	13	1.1.1.386.3	1	23.7028	0	-1
4	25.48	sp|P78619|CATB_EMENI	Catalase B OS=Emericella nidulans (strain FGSC A4 / ATCC 38163 / CBS 112.46 / NRRL 194 / M139) GN=catB PE=2 SV=2	99	GSTLLEDFIFR			1.01097	1297.68	649.848	1296.67	649.343	2	12	1.1.1.504.3	1	33.3324	0	-1
4	25.48	sp|P78619|CATB_EMENI	Catalase B OS=Emericella nidulans (strain FGSC A4 / ATCC 38163 / CBS 112.46 / NRRL 194 / M139) GN=catB PE=2 SV=2	99	GSTLLEDFIFR			0.000727772	1296.67	649.343	1296.67	649.343	2	12	1.1.1.498.4	1	32.8219	0	-1
4	25.48	sp|P78619|CATB_EMENI	Catalase B OS=Emericella nidulans (strain FGSC A4 / ATCC 38163 / CBS 112.46 / NRRL 194 / M139) GN=catB PE=2 SV=2	97.22	GSTLLEDFIFR			0.140008	1296.81	649.413	1296.67	649.343	2	13	1.1.1.500.3	1	32.9921	0	-1
4	25.48	sp|P78619|CATB_EMENI	Catalase B OS=Emericella nidulans (strain FGSC A4 / ATCC 38163 / CBS 112.46 / NRRL 194 / M139) GN=catB PE=2 SV=2	92.91	GSTLLEDFIFR			0.0886174	1296.76	649.387	1296.67	649.343	2	12	1.1.1.499.3	1	32.8896	0	-1
4	25.48	sp|P78619|CATB_EMENI	Catalase B OS=Emericella nidulans (strain FGSC A4 / ATCC 38163 / CBS 112.46 / NRRL 194 / M139) GN=catB PE=2 SV=2	36.47	GSTLLEDFIFR			2.97018	1299.64	650.828	1296.67	649.343	2	9	1.1.1.503.3	1	33.2648	0	-1
4	25.48	sp|P78619|CATB_EMENI	Catalase B OS=Emericella nidulans (strain FGSC A4 / ATCC 38163 / CBS 112.46 / NRRL 194 / M139) GN=catB PE=2 SV=2	75.16	LVTEDGSTK			0.236485	948.713	475.364	948.476	475.245	2	7	1.1.1.309.3	1	16.6282	0	-1
4	25.48	sp|P78619|CATB_EMENI	Catalase B OS=Emericella nidulans (strain FGSC A4 / ATCC 38163 / CBS 112.46 / NRRL 194 / M139) GN=catB PE=2 SV=2	67.14	LVTEDGSTK			1.20382	949.68	475.847	948.476	475.245	2	8	1.1.1.306.3	1	16.3204	0	-1
4	25.48	sp|P78619|CATB_EMENI	Catalase B OS=Emericella nidulans (strain FGSC A4 / ATCC 38163 / CBS 112.46 / NRRL 194 / M139) GN=catB PE=2 SV=2	66.48	SDVVKNNVIVQLNR		missed K-N@5	0.0825327	1596.98	533.333	1596.89	533.306	3	12	1.1.1.366.4	1	21.8576	0	-1
5	24.62	sp|Q92222|CHIB_EMEND	Endochitinase B OS=Emericella nidulans GN=chiB PE=1 SV=3	99	EALNAAQGQR	Glu->pyro-Glu@N-term		0.114911	1038.64	520.325	1038.52	520.268	2	14	1.1.1.309.3	1	18.2331	0	-1
5	24.62	sp|Q92222|CHIB_EMEND	Endochitinase B OS=Emericella nidulans GN=chiB PE=1 SV=3	99	IILGMPIYGR			0.039717	1131.69	566.851	1131.65	566.831	2	14	1.1.1.417.3	1	27.01	0	-1
5	24.62	sp|Q92222|CHIB_EMEND	Endochitinase B OS=Emericella nidulans GN=chiB PE=1 SV=3	99	NYNPQDLPAEK			-0.099821	1287.51	644.762	1287.61	644.812	2	13	1.1.1.327.4	1	19.9089	0	-1
5	24.62	sp|Q92222|CHIB_EMEND	Endochitinase B OS=Emericella nidulans GN=chiB PE=1 SV=3	99	RFQLTVAVPAGPDNYNKLR	Deamidated(Q)@3; Deamidated(N)@14	missed R-F@1; missed K-L@17	-0.320029	2159.81	540.96	2160.13	541.04	4	16	1.1.1.371.3	1	23.3222	0	-1
5	24.62	sp|Q92222|CHIB_EMEND	Endochitinase B OS=Emericella nidulans GN=chiB PE=1 SV=3	66.64	RLGGAMWWETSADKGGK	Oxidation(M)@6	missed R-L@1; missed K-G@14	-1.61542	1863.27	466.826	1864.89	467.23	4	8	1.1.1.539.4	1	35.8499	0	-1
5	24.62	sp|Q92222|CHIB_EMEND	Endochitinase B OS=Emericella nidulans GN=chiB PE=1 SV=3	99	CREALNAAQGQR	Carbamidomethyl(C)@1; Deamidated(R)@2; Dehydrated(E)@3	missed R-E@2	-0.045784	1355.59	678.803	1355.64	678.826	2	12	1.1.1.322.3	1	19.4296	0	-1
5	24.62	sp|Q92222|CHIB_EMEND	Endochitinase B OS=Emericella nidulans GN=chiB PE=1 SV=3	99	CREALNAAQGQR	Carbamidomethyl(C)@1	missed R-E@2	-0.474561	1372.19	458.403	1372.66	458.562	3	13	1.1.1.291.4	1	16.4199	0	-1
5	24.62	sp|Q92222|CHIB_EMEND	Endochitinase B OS=Emericella nidulans GN=chiB PE=1 SV=3	99	EALNAAQGQR			0.0314408	1056.56	529.289	1056.53	529.273	2	13	1.1.1.290.3	1	16.2823	0	-1
5	24.62	sp|Q92222|CHIB_EMEND	Endochitinase B OS=Emericella nidulans GN=chiB PE=1 SV=3	99	EALNAAQGQR	Glu->pyro-Glu@N-term		0.0528579	1038.57	520.294	1038.52	520.268	2	12	1.1.1.310.3	1	18.3359	0	-1
5	24.62	sp|Q92222|CHIB_EMEND	Endochitinase B OS=Emericella nidulans GN=chiB PE=1 SV=3	99	EALNAAQGQR	Glu->pyro-Glu@N-term		0.0913359	1038.61	520.313	1038.52	520.268	2	10	1.1.1.308.3	1	18.1303	0	-1
5	24.62	sp|Q92222|CHIB_EMEND	Endochitinase B OS=Emericella nidulans GN=chiB PE=1 SV=3	99	EALNAAQGQR			-0.0224285	1056.51	529.262	1056.53	529.273	2	12	1.1.1.291.3	1	16.3851	0	-1
5	24.62	sp|Q92222|CHIB_EMEND	Endochitinase B OS=Emericella nidulans GN=chiB PE=1 SV=3	98.87	EALNAAQGQR			-0.012412	1056.52	529.267	1056.53	529.273	2	10	1.1.1.292.3	1	16.4879	0	-1
5	24.62	sp|Q92222|CHIB_EMEND	Endochitinase B OS=Emericella nidulans GN=chiB PE=1 SV=3	98.72	EALNAAQGQR			-0.131266	1056.4	529.207	1056.53	529.273	2	11	1.1.1.293.3	1	16.5905	0	-1
5	24.62	sp|Q92222|CHIB_EMEND	Endochitinase B OS=Emericella nidulans GN=chiB PE=1 SV=3	98.65	EALNAAQGQR			-0.0518672	1056.48	529.247	1056.53	529.273	2	11	1.1.1.295.3	1	16.7958	0	-1
5	24.62	sp|Q92222|CHIB_EMEND	Endochitinase B OS=Emericella nidulans GN=chiB PE=1 SV=3	98.41	EALNAAQGQR	Glu->pyro-Glu@N-term		-0.445524	1038.08	520.045	1038.52	520.268	2	9	1.1.1.312.4	1	18.5759	0	-1
5	24.62	sp|Q92222|CHIB_EMEND	Endochitinase B OS=Emericella nidulans GN=chiB PE=1 SV=3	95.7	EALNAAQGQR			-0.13432	1056.4	529.206	1056.53	529.273	2	10	1.1.1.294.3	1	16.6931	0	-1
5	24.62	sp|Q92222|CHIB_EMEND	Endochitinase B OS=Emericella nidulans GN=chiB PE=1 SV=3	90.72	EALNAAQGQR			-0.374472	1056.16	529.086	1056.53	529.273	2	9	1.1.1.334.4	1	20.4893	0	-1
5	24.62	sp|Q92222|CHIB_EMEND	Endochitinase B OS=Emericella nidulans GN=chiB PE=1 SV=3	90.03	EALNAAQGQR			-0.00789233	1056.52	529.269	1056.53	529.273	2	8	1.1.1.305.3	1	17.822	0	-1
5	24.62	sp|Q92222|CHIB_EMEND	Endochitinase B OS=Emericella nidulans GN=chiB PE=1 SV=3	87.45	EALNAAQGQR			-0.0284139	1056.5	529.259	1056.53	529.273	2	8	1.1.1.303.3	1	17.6168	0	-1
5	24.62	sp|Q92222|CHIB_EMEND	Endochitinase B OS=Emericella nidulans GN=chiB PE=1 SV=3	87.21	EALNAAQGQR			-0.0650597	1056.47	529.24	1056.53	529.273	2	8	1.1.1.306.3	1	17.9247	0	-1
5	24.62	sp|Q92222|CHIB_EMEND	Endochitinase B OS=Emericella nidulans GN=chiB PE=1 SV=3	84.55	EALNAAQGQR			-0.410507	1056.12	529.068	1056.53	529.273	2	8	1.1.1.317.4	1	18.9851	0	-1
5	24.62	sp|Q92222|CHIB_EMEND	Endochitinase B OS=Emericella nidulans GN=chiB PE=1 SV=3	81.29	EALNAAQGQR			-0.404888	1056.13	529.07	1056.53	529.273	2	7	1.1.1.309.4	1	18.2679	0	-1
5	24.62	sp|Q92222|CHIB_EMEND	Endochitinase B OS=Emericella nidulans GN=chiB PE=1 SV=3	73.02	EALNAAQGQR			-0.116486	1056.41	529.215	1056.53	529.273	2	8	1.1.1.301.3	1	17.4116	0	-1
5	24.62	sp|Q92222|CHIB_EMEND	Endochitinase B OS=Emericella nidulans GN=chiB PE=1 SV=3	67.83	EALNAAQGQR	Deamidated(Q)@7		-1.08535	1056.43	529.222	1057.52	529.765	2	8	1.1.1.299.3	1	17.2062	0	-1
5	24.62	sp|Q92222|CHIB_EMEND	Endochitinase B OS=Emericella nidulans GN=chiB PE=1 SV=3	38.4	EALNAAQGQR			-0.306677	1056.22	529.12	1056.53	529.273	2	7	1.1.1.310.4	1	18.3707	0	-1
5	24.62	sp|Q92222|CHIB_EMEND	Endochitinase B OS=Emericella nidulans GN=chiB PE=1 SV=3	35.29	EALNAAQGQR	Deamidated(N)@4		-1.07888	1056.44	529.226	1057.52	529.765	2	7	1.1.1.297.3	1	17.0009	0	-1
5	24.62	sp|Q92222|CHIB_EMEND	Endochitinase B OS=Emericella nidulans GN=chiB PE=1 SV=3	25.63	EALNAAQGQR			-0.0562647	1056.48	529.245	1056.53	529.273	2	7	1.1.1.298.3	1	17.1036	0	-1
5	24.62	sp|Q92222|CHIB_EMEND	Endochitinase B OS=Emericella nidulans GN=chiB PE=1 SV=3	19.24	EALNAAQGQR	Methyl+Deamidated(Q)@9		0.0228128	1071.55	536.784	1071.53	536.773	2	8	1.1.1.307.3	1	18.0275	0	-1
5	24.62	sp|Q92222|CHIB_EMEND	Endochitinase B OS=Emericella nidulans GN=chiB PE=1 SV=3	99	IILGMPIYGR	Oxidation(M)@5		-0.0186999	1147.62	574.819	1147.64	574.828	2	15	1.1.1.360.3	1	22.3636	0	-1
5	24.62	sp|Q92222|CHIB_EMEND	Endochitinase B OS=Emericella nidulans GN=chiB PE=1 SV=3	99	IILGMPIYGR	Oxidation(M)@5		0.0953905	1147.74	574.876	1147.64	574.828	2	14	1.1.1.364.3	1	22.7751	0	-1
5	24.62	sp|Q92222|CHIB_EMEND	Endochitinase B OS=Emericella nidulans GN=chiB PE=1 SV=3	99	IILGMPIYGR			0.102503	1131.75	566.882	1131.65	566.831	2	14	1.1.1.419.3	1	27.2157	0	-1
5	24.62	sp|Q92222|CHIB_EMEND	Endochitinase B OS=Emericella nidulans GN=chiB PE=1 SV=3	99	IILGMPIYGR	Oxidation(M)@5		0.0979557	1147.74	574.877	1147.64	574.828	2	14	1.1.1.420.3	1	27.3185	0	-1
5	24.62	sp|Q92222|CHIB_EMEND	Endochitinase B OS=Emericella nidulans GN=chiB PE=1 SV=3	99	IILGMPIYGR	Oxidation(M)@5		0.0455523	1147.69	574.851	1147.64	574.828	2	14	1.1.1.358.3	1	22.1578	0	-1
5	24.62	sp|Q92222|CHIB_EMEND	Endochitinase B OS=Emericella nidulans GN=chiB PE=1 SV=3	99	IILGMPIYGR	Oxidation(M)@5		0.101742	1147.74	574.879	1147.64	574.828	2	14	1.1.1.359.3	1	22.2607	0	-1
5	24.62	sp|Q92222|CHIB_EMEND	Endochitinase B OS=Emericella nidulans GN=chiB PE=1 SV=3	99	IILGMPIYGR	Oxidation(M)@5		-0.0177226	1147.62	574.82	1147.64	574.828	2	12	1.1.1.361.3	1	22.4664	0	-1
5	24.62	sp|Q92222|CHIB_EMEND	Endochitinase B OS=Emericella nidulans GN=chiB PE=1 SV=3	99	IILGMPIYGR			0.0742862	1131.72	566.868	1131.65	566.831	2	13	1.1.1.411.3	1	26.3937	0	-1
5	24.62	sp|Q92222|CHIB_EMEND	Endochitinase B OS=Emericella nidulans GN=chiB PE=1 SV=3	99	IILGMPIYGR	Oxidation(M)@5		-0.0519253	1147.59	574.803	1147.64	574.828	2	14	1.1.1.411.4	1	26.4285	0	-1
5	24.62	sp|Q92222|CHIB_EMEND	Endochitinase B OS=Emericella nidulans GN=chiB PE=1 SV=3	99	IILGMPIYGR			0.0604829	1131.71	566.861	1131.65	566.831	2	14	1.1.1.414.3	1	26.702	0	-1
5	24.62	sp|Q92222|CHIB_EMEND	Endochitinase B OS=Emericella nidulans GN=chiB PE=1 SV=3	99	IILGMPIYGR	Oxidation(M)@5		-0.0957781	1147.55	574.781	1147.64	574.828	2	13	1.1.1.414.4	1	26.7367	0	-1
5	24.62	sp|Q92222|CHIB_EMEND	Endochitinase B OS=Emericella nidulans GN=chiB PE=1 SV=3	99	IILGMPIYGR	Oxidation(M)@5		-0.0801426	1147.56	574.788	1147.64	574.828	2	13	1.1.1.362.3	1	22.5691	0	-1
5	24.62	sp|Q92222|CHIB_EMEND	Endochitinase B OS=Emericella nidulans GN=chiB PE=1 SV=3	99	IILGMPIYGR	Oxidation(M)@5		0.0569125	1147.7	574.857	1147.64	574.828	2	13	1.1.1.363.3	1	22.6721	0	-1
5	24.62	sp|Q92222|CHIB_EMEND	Endochitinase B OS=Emericella nidulans GN=chiB PE=1 SV=3	99	IILGMPIYGR	Oxidation(M)@5		0.0490947	1147.69	574.853	1147.64	574.828	2	13	1.1.1.365.3	1	22.8434	0	-1
5	24.62	sp|Q92222|CHIB_EMEND	Endochitinase B OS=Emericella nidulans GN=chiB PE=1 SV=3	99	IILGMPIYGR	Oxidation(M)@5		-0.107138	1147.54	574.775	1147.64	574.828	2	12	1.1.1.378.4	1	23.9039	0	-1
5	24.62	sp|Q92222|CHIB_EMEND	Endochitinase B OS=Emericella nidulans GN=chiB PE=1 SV=3	99	IILGMPIYGR	Oxidation(M)@5		-0.0741571	1147.57	574.791	1147.64	574.828	2	11	1.1.1.386.4	1	24.4484	0	-1
5	24.62	sp|Q92222|CHIB_EMEND	Endochitinase B OS=Emericella nidulans GN=chiB PE=1 SV=3	99	IILGMPIYGR	Oxidation(M)@5		-0.0603539	1147.58	574.798	1147.64	574.828	2	12	1.1.1.409.3	1	26.1881	0	-1
5	24.62	sp|Q92222|CHIB_EMEND	Endochitinase B OS=Emericella nidulans GN=chiB PE=1 SV=3	99	IILGMPIYGR	Oxidation(M)@5		0.0249086	1147.67	574.841	1147.64	574.828	2	13	1.1.1.412.4	1	26.531	0	-1
5	24.62	sp|Q92222|CHIB_EMEND	Endochitinase B OS=Emericella nidulans GN=chiB PE=1 SV=3	99	IILGMPIYGR			0.0636589	1131.71	566.863	1131.65	566.831	2	14	1.1.1.408.3	1	26.0852	0	-1
5	24.62	sp|Q92222|CHIB_EMEND	Endochitinase B OS=Emericella nidulans GN=chiB PE=1 SV=3	99	IILGMPIYGR			-0.367417	1131.28	566.647	1131.65	566.831	2	9	1.1.1.1059.4	1	73.383	0	-1
5	24.62	sp|Q92222|CHIB_EMEND	Endochitinase B OS=Emericella nidulans GN=chiB PE=1 SV=3	99	IILGMPIYGR			0.0122327	1131.66	566.837	1131.65	566.831	2	14	1.1.1.412.3	1	26.4963	0	-1
5	24.62	sp|Q92222|CHIB_EMEND	Endochitinase B OS=Emericella nidulans GN=chiB PE=1 SV=3	99	IILGMPIYGR	Oxidation(M)@5		-0.0969996	1147.55	574.78	1147.64	574.828	2	13	1.1.1.418.4	1	27.1476	0	-1
5	24.62	sp|Q92222|CHIB_EMEND	Endochitinase B OS=Emericella nidulans GN=chiB PE=1 SV=3	99	IILGMPIYGR			-0.223033	1131.42	566.72	1131.65	566.831	2	10	1.1.1.499.4	1	33.107	0	-1
5	24.62	sp|Q92222|CHIB_EMEND	Endochitinase B OS=Emericella nidulans GN=chiB PE=1 SV=3	99	IILGMPIYGR			0.0751412	1131.72	566.869	1131.65	566.831	2	12	1.1.1.415.3	1	26.8048	0	-1
5	24.62	sp|Q92222|CHIB_EMEND	Endochitinase B OS=Emericella nidulans GN=chiB PE=1 SV=3	99	IILGMPIYGR	Oxidation(M)@5		-0.262028	1147.38	574.697	1147.64	574.828	2	9	1.1.1.1139.4	1	78.1881	0	-1
5	24.62	sp|Q92222|CHIB_EMEND	Endochitinase B OS=Emericella nidulans GN=chiB PE=1 SV=3	99	IILGMPIYGR			-0.794462	1130.85	566.434	1131.65	566.831	2	10	1.1.1.435.3	1	28.4766	0	-1
5	24.62	sp|Q92222|CHIB_EMEND	Endochitinase B OS=Emericella nidulans GN=chiB PE=1 SV=3	99	IILGMPIYGR			0.0334872	1131.68	566.848	1131.65	566.831	2	12	1.1.1.416.3	1	26.9073	0	-1
5	24.62	sp|Q92222|CHIB_EMEND	Endochitinase B OS=Emericella nidulans GN=chiB PE=1 SV=3	99	IILGMPIYGR			-0.215826	1131.43	566.723	1131.65	566.831	2	10	1.1.1.467.4	1	30.8644	0	-1
5	24.62	sp|Q92222|CHIB_EMEND	Endochitinase B OS=Emericella nidulans GN=chiB PE=1 SV=3	99	IILGMPIYGR			-0.30231	1131.35	566.68	1131.65	566.831	2	9	1.1.1.527.4	1	34.9686	0	-1
5	24.62	sp|Q92222|CHIB_EMEND	Endochitinase B OS=Emericella nidulans GN=chiB PE=1 SV=3	99	IILGMPIYGR			-0.291072	1131.36	566.686	1131.65	566.831	2	10	1.1.1.544.4	1	36.1881	0	-1
5	24.62	sp|Q92222|CHIB_EMEND	Endochitinase B OS=Emericella nidulans GN=chiB PE=1 SV=3	99	IILGMPIYGR	Oxidation(M)@5		-1.18147	1146.46	574.238	1147.64	574.828	2	9	1.1.1.476.3	1	31.5107	0	-1
5	24.62	sp|Q92222|CHIB_EMEND	Endochitinase B OS=Emericella nidulans GN=chiB PE=1 SV=3	99	IILGMPIYGR	Oxidation(M)@5		-0.0535133	1147.59	574.802	1147.64	574.828	2	10	1.1.1.385.4	1	24.3802	0	-1
5	24.62	sp|Q92222|CHIB_EMEND	Endochitinase B OS=Emericella nidulans GN=chiB PE=1 SV=3	99	IILGMPIYGR			0.0365411	1131.68	566.849	1131.65	566.831	2	14	1.1.1.418.3	1	27.1128	0	-1
5	24.62	sp|Q92222|CHIB_EMEND	Endochitinase B OS=Emericella nidulans GN=chiB PE=1 SV=3	99	IILGMPIYGR	Oxidation(M)@5		0.724231	1148.37	575.191	1147.64	574.828	2	9	1.1.1.441.4	1	29.0588	0	-1
5	24.62	sp|Q92222|CHIB_EMEND	Endochitinase B OS=Emericella nidulans GN=chiB PE=1 SV=3	99	IILGMPIYGR			-0.259068	1131.39	566.702	1131.65	566.831	2	9	1.1.1.489.4	1	32.3936	0	-1
5	24.62	sp|Q92222|CHIB_EMEND	Endochitinase B OS=Emericella nidulans GN=chiB PE=1 SV=3	99	IILGMPIYGR			0.0459468	1131.69	566.854	1131.65	566.831	2	13	1.1.1.410.3	1	26.2909	0	-1
5	24.62	sp|Q92222|CHIB_EMEND	Endochitinase B OS=Emericella nidulans GN=chiB PE=1 SV=3	99	IILGMPIYGR	Oxidation(M)@5		-0.126194	1147.52	574.765	1147.64	574.828	2	10	1.1.1.423.4	1	27.627	0	-1
5	24.62	sp|Q92222|CHIB_EMEND	Endochitinase B OS=Emericella nidulans GN=chiB PE=1 SV=3	98.97	IILGMPIYGR			-0.284964	1131.36	566.688	1131.65	566.831	2	15	1.1.1.409.4	1	26.2229	0	-1
5	24.62	sp|Q92222|CHIB_EMEND	Endochitinase B OS=Emericella nidulans GN=chiB PE=1 SV=3	98.82	IILGMPIYGR			-0.369127	1131.28	566.646	1131.65	566.831	2	8	1.1.1.1075.4	1	74.2258	0	-1
5	24.62	sp|Q92222|CHIB_EMEND	Endochitinase B OS=Emericella nidulans GN=chiB PE=1 SV=3	98.44	IILGMPIYGR			-0.327107	1131.32	566.667	1131.65	566.831	2	9	1.1.1.520.4	1	34.5645	0	-1
5	24.62	sp|Q92222|CHIB_EMEND	Endochitinase B OS=Emericella nidulans GN=chiB PE=1 SV=3	98.33	IILGMPIYGR	Oxidation(M)@5; Oxidation(P)@6		0.0323318	1163.67	582.842	1163.64	582.826	2	11	1.1.1.410.4	1	26.3257	0	-1
5	24.62	sp|Q92222|CHIB_EMEND	Endochitinase B OS=Emericella nidulans GN=chiB PE=1 SV=3	98.24	IILGMPIYGR			-0.35337	1131.29	566.654	1131.65	566.831	2	8	1.1.1.634.4	1	43.0046	0	-1
5	24.62	sp|Q92222|CHIB_EMEND	Endochitinase B OS=Emericella nidulans GN=chiB PE=1 SV=3	98.21	IILGMPIYGR	Oxidation(M)@5		-0.0969996	1147.55	574.78	1147.64	574.828	2	9	1.1.1.379.4	1	23.9719	0	-1
5	24.62	sp|Q92222|CHIB_EMEND	Endochitinase B OS=Emericella nidulans GN=chiB PE=1 SV=3	98.12	IILGMPIYGR			-0.312571	1131.33	566.675	1131.65	566.831	2	8	1.1.1.912.4	1	63.8972	0	-1
5	24.62	sp|Q92222|CHIB_EMEND	Endochitinase B OS=Emericella nidulans GN=chiB PE=1 SV=3	97.97	IILGMPIYGR	Oxidation(M)@5		-0.217808	1147.42	574.72	1147.64	574.828	2	9	1.1.1.435.4	1	28.5114	0	-1
5	24.62	sp|Q92222|CHIB_EMEND	Endochitinase B OS=Emericella nidulans GN=chiB PE=1 SV=3	97.77	IILGMPIYGR	Oxidation(M)@5		-0.124117	1147.52	574.766	1147.64	574.828	2	9	1.1.1.381.4	1	24.108	0	-1
5	24.62	sp|Q92222|CHIB_EMEND	Endochitinase B OS=Emericella nidulans GN=chiB PE=1 SV=3	97.42	IILGMPIYGR			0.132309	1131.78	566.897	1131.65	566.831	2	12	1.1.1.422.3	1	27.5242	0	-1
5	24.62	sp|Q92222|CHIB_EMEND	Endochitinase B OS=Emericella nidulans GN=chiB PE=1 SV=3	97.27	IILGMPIYGR			-0.376823	1131.27	566.643	1131.65	566.831	2	8	1.1.1.923.4	1	64.643	0	-1
5	24.62	sp|Q92222|CHIB_EMEND	Endochitinase B OS=Emericella nidulans GN=chiB PE=1 SV=3	97.26	IILGMPIYGR			-0.286919	1131.36	566.688	1131.65	566.831	2	9	1.1.1.528.4	1	35.0362	0	-1
5	24.62	sp|Q92222|CHIB_EMEND	Endochitinase B OS=Emericella nidulans GN=chiB PE=1 SV=3	97	IILGMPIYGR	Oxidation(M)@5		-0.0579108	1147.58	574.799	1147.64	574.828	2	10	1.1.1.416.4	1	26.9421	0	-1
5	24.62	sp|Q92222|CHIB_EMEND	Endochitinase B OS=Emericella nidulans GN=chiB PE=1 SV=3	96.92	IILGMPIYGR	Oxidation(M)@5		-0.343748	1147.3	574.657	1147.64	574.828	2	7	1.1.1.866.4	1	60.2519	0	-1
5	24.62	sp|Q92222|CHIB_EMEND	Endochitinase B OS=Emericella nidulans GN=chiB PE=1 SV=3	96.56	IILGMPIYGR	Oxidation(M)@5		0.0465295	1147.69	574.852	1147.64	574.828	2	10	1.1.1.413.3	1	26.5991	0	-1
5	24.62	sp|Q92222|CHIB_EMEND	Endochitinase B OS=Emericella nidulans GN=chiB PE=1 SV=3	95.63	IILGMPIYGR	Oxidation(M)@5		-0.0899147	1147.55	574.784	1147.64	574.828	2	10	1.1.1.421.4	1	27.4562	0	-1
5	24.62	sp|Q92222|CHIB_EMEND	Endochitinase B OS=Emericella nidulans GN=chiB PE=1 SV=3	95.47	IILGMPIYGR	Oxidation(M)@5		0.04372	1147.69	574.85	1147.64	574.828	2	10	1.1.1.366.4	1	22.9464	0	-1
5	24.62	sp|Q92222|CHIB_EMEND	Endochitinase B OS=Emericella nidulans GN=chiB PE=1 SV=3	94.92	IILGMPIYGR			-0.15646	1131.49	566.753	1131.65	566.831	2	9	1.1.1.438.4	1	28.785	0	-1
5	24.62	sp|Q92222|CHIB_EMEND	Endochitinase B OS=Emericella nidulans GN=chiB PE=1 SV=3	94.88	IILGMPIYGR			-0.16269	1131.48	566.75	1131.65	566.831	2	8	1.1.1.445.4	1	29.3316	0	-1
5	24.62	sp|Q92222|CHIB_EMEND	Endochitinase B OS=Emericella nidulans GN=chiB PE=1 SV=3	94.21	IILGMPIYGR			-0.314769	1131.33	566.674	1131.65	566.831	2	8	1.1.1.1084.4	1	74.7672	0	-1
5	24.62	sp|Q92222|CHIB_EMEND	Endochitinase B OS=Emericella nidulans GN=chiB PE=1 SV=3	93.71	IILGMPIYGR	Oxidation(M)@5		-0.0497266	1147.59	574.804	1147.64	574.828	2	9	1.1.1.392.4	1	24.8919	0	-1
5	24.62	sp|Q92222|CHIB_EMEND	Endochitinase B OS=Emericella nidulans GN=chiB PE=1 SV=3	93.03	IILGMPIYGR	Oxidation(M)@5		-0.050093	1147.59	574.803	1147.64	574.828	2	10	1.1.1.417.4	1	27.0448	0	-1
5	24.62	sp|Q92222|CHIB_EMEND	Endochitinase B OS=Emericella nidulans GN=chiB PE=1 SV=3	92.77	IILGMPIYGR			-0.280689	1131.37	566.691	1131.65	566.831	2	8	1.1.1.501.4	1	33.2426	0	-1
5	24.62	sp|Q92222|CHIB_EMEND	Endochitinase B OS=Emericella nidulans GN=chiB PE=1 SV=3	90.44	IILGMPIYGR	Oxidation(M)@5		-0.35352	1147.29	574.652	1147.64	574.828	2	10	1.1.1.467.3	1	30.8296	0	-1
5	24.62	sp|Q92222|CHIB_EMEND	Endochitinase B OS=Emericella nidulans GN=chiB PE=1 SV=3	89.61	IILGMPIYGR			-0.311716	1131.34	566.675	1131.65	566.831	2	7	1.1.1.938.4	1	65.7297	0	-1
5	24.62	sp|Q92222|CHIB_EMEND	Endochitinase B OS=Emericella nidulans GN=chiB PE=1 SV=3	87.3	IILGMPIYGR			-0.339811	1131.31	566.661	1131.65	566.831	2	8	1.1.1.560.4	1	37.3397	0	-1
5	24.62	sp|Q92222|CHIB_EMEND	Endochitinase B OS=Emericella nidulans GN=chiB PE=1 SV=3	86.37	IILGMPIYGR	Oxidation(M)@5		-0.124606	1147.52	574.766	1147.64	574.828	2	9	1.1.1.422.4	1	27.559	0	-1
5	24.62	sp|Q92222|CHIB_EMEND	Endochitinase B OS=Emericella nidulans GN=chiB PE=1 SV=3	85.51	IILGMPIYGR	Oxidation(M)@5		-0.346679	1147.3	574.655	1147.64	574.828	2	7	1.1.1.1025.4	1	71.3185	0	-1
5	24.62	sp|Q92222|CHIB_EMEND	Endochitinase B OS=Emericella nidulans GN=chiB PE=1 SV=3	82.27	IILGMPIYGR	Oxidation(M)@5		-0.345946	1147.3	574.655	1147.64	574.828	2	10	1.1.1.438.3	1	28.7502	0	-1
5	24.62	sp|Q92222|CHIB_EMEND	Endochitinase B OS=Emericella nidulans GN=chiB PE=1 SV=3	79.89	IILGMPIYGR			-0.328939	1131.32	566.667	1131.65	566.831	2	7	1.1.1.653.4	1	44.6032	0	-1
5	24.62	sp|Q92222|CHIB_EMEND	Endochitinase B OS=Emericella nidulans GN=chiB PE=1 SV=3	77.7	IILGMPIYGR			-0.375601	1131.27	566.643	1131.65	566.831	2	7	1.1.1.859.4	1	59.7427	0	-1
5	24.62	sp|Q92222|CHIB_EMEND	Endochitinase B OS=Emericella nidulans GN=chiB PE=1 SV=3	77.33	IILGMPIYGR			-0.324297	1131.32	566.669	1131.65	566.831	2	6	1.1.1.862.4	1	59.9459	0	-1
5	24.62	sp|Q92222|CHIB_EMEND	Endochitinase B OS=Emericella nidulans GN=chiB PE=1 SV=3	76.82	IILGMPIYGR	Oxidation(M)@5		0.0922146	1147.73	574.875	1147.64	574.828	2	7	1.1.1.1130.3	1	77.3688	0	-1
5	24.62	sp|Q92222|CHIB_EMEND	Endochitinase B OS=Emericella nidulans GN=chiB PE=1 SV=3	75.97	IILGMPIYGR	Dioxidation(M)@5		0.0544414	1163.69	582.853	1163.64	582.826	2	11	1.1.1.360.4	1	22.3983	0	-1
5	24.62	sp|Q92222|CHIB_EMEND	Endochitinase B OS=Emericella nidulans GN=chiB PE=1 SV=3	73.45	IILGMPIYGR	Oxidation(M)@5		-0.309545	1147.33	574.674	1147.64	574.828	2	6	1.1.1.725.4	1	49.8622	0	-1
5	24.62	sp|Q92222|CHIB_EMEND	Endochitinase B OS=Emericella nidulans GN=chiB PE=1 SV=3	73.39	IILGMPIYGR	Oxidation(P)@6; Oxidation(Y)@8		0.0400274	1163.68	582.846	1163.64	582.826	2	11	1.1.1.419.4	1	27.2505	0	-1
5	24.62	sp|Q92222|CHIB_EMEND	Endochitinase B OS=Emericella nidulans GN=chiB PE=1 SV=3	69.82	IILGMPIYGR	Oxidation(M)@5; Oxidation(P)@6		0.0636029	1163.7	582.858	1163.64	582.826	2	11	1.1.1.361.4	1	22.5012	0	-1
5	24.62	sp|Q92222|CHIB_EMEND	Endochitinase B OS=Emericella nidulans GN=chiB PE=1 SV=3	69.1	IILGMPIYGR	Oxidation(M)@5		0.133258	1147.78	574.895	1147.64	574.828	2	7	1.1.1.980.3	1	68.4739	0	-1
5	24.62	sp|Q92222|CHIB_EMEND	Endochitinase B OS=Emericella nidulans GN=chiB PE=1 SV=3	68.73	IILGMPIYGR	Oxidation(M)@5		0.288758	1147.93	574.973	1147.64	574.828	2	10	1.1.1.387.3	1	24.5166	0	-1
5	24.62	sp|Q92222|CHIB_EMEND	Endochitinase B OS=Emericella nidulans GN=chiB PE=1 SV=3	57.83	IILGMPIYGR	Oxidation(M)@5; Oxidation(Y)@8		0.0383173	1163.68	582.845	1163.64	582.826	2	11	1.1.1.415.4	1	26.8396	0	-1
5	24.62	sp|Q92222|CHIB_EMEND	Endochitinase B OS=Emericella nidulans GN=chiB PE=1 SV=3	15.3	IILGMPIYGR	Oxidation(M)@5; Pro->pyro-Glu(P)@6		0.891809	1162.51	582.264	1161.62	581.818	2	9	1.1.1.420.4	1	27.3533	0	-1
5	24.62	sp|Q92222|CHIB_EMEND	Endochitinase B OS=Emericella nidulans GN=chiB PE=1 SV=3	99	NYNPQDLPAEK			-0.0807652	1287.53	644.772	1287.61	644.812	2	12	1.1.1.318.4	1	19.088	0	-1
5	24.62	sp|Q92222|CHIB_EMEND	Endochitinase B OS=Emericella nidulans GN=chiB PE=1 SV=3	99	NYNPQDLPAEK			0.1545	1287.76	644.889	1287.61	644.812	2	14	1.1.1.320.3	1	19.2587	0	-1
5	24.62	sp|Q92222|CHIB_EMEND	Endochitinase B OS=Emericella nidulans GN=chiB PE=1 SV=3	99	NYNPQDLPAEK			-0.046196	1287.56	644.789	1287.61	644.812	2	13	1.1.1.322.4	1	19.4644	0	-1
5	24.62	sp|Q92222|CHIB_EMEND	Endochitinase B OS=Emericella nidulans GN=chiB PE=1 SV=3	99	NYNPQDLPAEK			-0.0127263	1287.6	644.806	1287.61	644.812	2	13	1.1.1.319.3	1	19.1559	0	-1
5	24.62	sp|Q92222|CHIB_EMEND	Endochitinase B OS=Emericella nidulans GN=chiB PE=1 SV=3	30.8	NYNPQDLPAEK	Methyl(E)@10		-0.109593	1301.52	651.765	1301.63	651.82	2	9	1.1.1.338.4	1	20.8658	0	-1
5	24.62	sp|Q92222|CHIB_EMEND	Endochitinase B OS=Emericella nidulans GN=chiB PE=1 SV=3	89.5	RFQLTVAVPAGPDNYNKLR	Deamidated(N)@14	missed R-F@1; missed K-L@17	0.294353	2159.44	540.868	2159.15	540.794	4	13	1.1.1.367.4	1	23.0494	0	-1
6	15.35	sp|Q5B7R2|CELB_EMENI	Endo-beta-1,4-glucanase celB OS=Emericella nidulans (strain FGSC A4 / ATCC 38163 / CBS 112.46 / NRRL 194 / M139) GN=celB PE=1 SV=1	99	GQGFEVDTK			0.0149725	979.476	490.745	979.461	490.738	2	10	1.1.1.294.3	1	25.5032	0	-1
6	15.35	sp|Q5B7R2|CELB_EMENI	Endo-beta-1,4-glucanase celB OS=Emericella nidulans (strain FGSC A4 / ATCC 38163 / CBS 112.46 / NRRL 194 / M139) GN=celB PE=1 SV=1	99	NVNGALSSVSPR	Deamidated(N)@3		-0.0135777	1200.6	601.305	1200.61	601.312	2	17	1.1.1.304.3	1	26.1972	0	-1
6	15.35	sp|Q5B7R2|CELB_EMENI	Endo-beta-1,4-glucanase celB OS=Emericella nidulans (strain FGSC A4 / ATCC 38163 / CBS 112.46 / NRRL 194 / M139) GN=celB PE=1 SV=1	99	STGFTPHACLYEPEETEGR	Carbamidomethyl(C)@9		0.0166344	2179.96	727.662	2179.95	727.657	3	18	1.1.1.339.3	1	28.4804	0	-1
6	15.35	sp|Q5B7R2|CELB_EMENI	Endo-beta-1,4-glucanase celB OS=Emericella nidulans (strain FGSC A4 / ATCC 38163 / CBS 112.46 / NRRL 194 / M139) GN=celB PE=1 SV=1	99	VYLVDESDPDEQEYR			-0.0810048	1855.73	928.872	1855.81	928.913	2	22	1.1.1.335.3	1	28.2244	0	-1
6	15.35	sp|Q5B7R2|CELB_EMENI	Endo-beta-1,4-glucanase celB OS=Emericella nidulans (strain FGSC A4 / ATCC 38163 / CBS 112.46 / NRRL 194 / M139) GN=celB PE=1 SV=1	99	NVNGALSSVSPR	Deamidated(N)@3		0.0403773	1200.65	601.332	1200.61	601.312	2	15	1.1.1.303.3	1	26.0768	0	-1
6	15.35	sp|Q5B7R2|CELB_EMENI	Endo-beta-1,4-glucanase celB OS=Emericella nidulans (strain FGSC A4 / ATCC 38163 / CBS 112.46 / NRRL 194 / M139) GN=celB PE=1 SV=1	99	NVNGALSSVSPR	Deamidated(N)@3		0.00082655	1200.61	601.313	1200.61	601.312	2	15	1.1.1.305.3	1	26.3176	0	-1
6	15.35	sp|Q5B7R2|CELB_EMENI	Endo-beta-1,4-glucanase celB OS=Emericella nidulans (strain FGSC A4 / ATCC 38163 / CBS 112.46 / NRRL 194 / M139) GN=celB PE=1 SV=1	99	NVNGALSSVSPR	Deamidated(N)@3		0.0109584	1200.62	601.318	1200.61	601.312	2	12	1.1.1.307.4	1	26.4449	0	-1
6	15.35	sp|Q5B7R2|CELB_EMENI	Endo-beta-1,4-glucanase celB OS=Emericella nidulans (strain FGSC A4 / ATCC 38163 / CBS 112.46 / NRRL 194 / M139) GN=celB PE=1 SV=1	99	NVNGALSSVSPR	Deamidated(N)@3		-0.0128453	1200.6	601.306	1200.61	601.312	2	10	1.1.1.319.4	1	27.2121	0	-1
6	15.35	sp|Q5B7R2|CELB_EMENI	Endo-beta-1,4-glucanase celB OS=Emericella nidulans (strain FGSC A4 / ATCC 38163 / CBS 112.46 / NRRL 194 / M139) GN=celB PE=1 SV=1	99	STGFTPHACLYEPEETEGR	Carbamidomethyl(C)@9; Methyl(E)@15		-0.0837325	2193.88	732.301	2193.96	732.328	3	16	1.1.1.348.3	1	29.0469	0	-1
7	19.57	sp|Q5AUT0|EGLC_EMENI	Probable glucan endo-1,3-beta-glucosidase eglC OS=Emericella nidulans (strain FGSC A4 / ATCC 38163 / CBS 112.46 / NRRL 194 / M139) GN=eglC PE=1 SV=1	99	AAINQYGDEFAK			-0.0923437	1325.53	663.774	1325.63	663.82	2	16	1.1.1.350.4	1	21.5775	0	-1
7	19.57	sp|Q5AUT0|EGLC_EMENI	Probable glucan endo-1,3-beta-glucosidase eglC OS=Emericella nidulans (strain FGSC A4 / ATCC 38163 / CBS 112.46 / NRRL 194 / M139) GN=eglC PE=1 SV=1	99	ALFDESVQK			0.151385	1035.68	518.845	1035.52	518.769	2	14	1.1.1.356.4	1	22.1596	0	-1
7	19.57	sp|Q5AUT0|EGLC_EMENI	Probable glucan endo-1,3-beta-glucosidase eglC OS=Emericella nidulans (strain FGSC A4 / ATCC 38163 / CBS 112.46 / NRRL 194 / M139) GN=eglC PE=1 SV=1	99	ALFDESVQKTK		missed K-T@9	-0.0427217	1264.62	633.319	1264.67	633.34	2	12	1.1.1.339.4	1	20.5156	0	-1
7	19.57	sp|Q5AUT0|EGLC_EMENI	Probable glucan endo-1,3-beta-glucosidase eglC OS=Emericella nidulans (strain FGSC A4 / ATCC 38163 / CBS 112.46 / NRRL 194 / M139) GN=eglC PE=1 SV=1	99	NLETTSGFNSAR			-0.0916278	1295.52	648.767	1295.61	648.813	2	14	1.1.1.327.4	1	19.489	0	-1
7	19.57	sp|Q5AUT0|EGLC_EMENI	Probable glucan endo-1,3-beta-glucosidase eglC OS=Emericella nidulans (strain FGSC A4 / ATCC 38163 / CBS 112.46 / NRRL 194 / M139) GN=eglC PE=1 SV=1	99	TAKNLETTSGFNSAR		missed K-N@3	0.00618447	1595.8	532.939	1595.79	532.937	3	17	1.1.1.317.3	1	18.6674	0	-1
7	19.57	sp|Q5AUT0|EGLC_EMENI	Probable glucan endo-1,3-beta-glucosidase eglC OS=Emericella nidulans (strain FGSC A4 / ATCC 38163 / CBS 112.46 / NRRL 194 / M139) GN=eglC PE=1 SV=1	99	VQADFEAEFR			-0.0471926	1210.51	606.265	1210.56	606.288	2	13	1.1.1.389.4	1	25.1355	0	-1
7	19.57	sp|Q5AUT0|EGLC_EMENI	Probable glucan endo-1,3-beta-glucosidase eglC OS=Emericella nidulans (strain FGSC A4 / ATCC 38163 / CBS 112.46 / NRRL 194 / M139) GN=eglC PE=1 SV=1	96.01	ADFEAEFR		cleaved Q-A@N-term	0.117288	983.552	492.783	983.435	492.725	2	11	1.1.1.371.4	1	23.5282	0	-1
7	19.57	sp|Q5AUT0|EGLC_EMENI	Probable glucan endo-1,3-beta-glucosidase eglC OS=Emericella nidulans (strain FGSC A4 / ATCC 38163 / CBS 112.46 / NRRL 194 / M139) GN=eglC PE=1 SV=1	21.97	GFNYGANKPDGTLK			0.36594	1481.1	494.706	1480.73	494.584	3	10	1.1.1.330.4	1	19.7631	0	-1
7	19.57	sp|Q5AUT0|EGLC_EMENI	Probable glucan endo-1,3-beta-glucosidase eglC OS=Emericella nidulans (strain FGSC A4 / ATCC 38163 / CBS 112.46 / NRRL 194 / M139) GN=eglC PE=1 SV=1	99	AAINQYGDEFAK			-0.081735	1325.54	663.779	1325.63	663.82	2	16	1.1.1.348.4	1	21.3717	0	-1
7	19.57	sp|Q5AUT0|EGLC_EMENI	Probable glucan endo-1,3-beta-glucosidase eglC OS=Emericella nidulans (strain FGSC A4 / ATCC 38163 / CBS 112.46 / NRRL 194 / M139) GN=eglC PE=1 SV=1	99	AAINQYGDEFAK			-0.0903927	1325.53	663.775	1325.63	663.82	2	18	1.1.1.349.4	1	21.4746	0	-1
7	19.57	sp|Q5AUT0|EGLC_EMENI	Probable glucan endo-1,3-beta-glucosidase eglC OS=Emericella nidulans (strain FGSC A4 / ATCC 38163 / CBS 112.46 / NRRL 194 / M139) GN=eglC PE=1 SV=1	99	ALFDESVQK			0.318075	1035.84	518.928	1035.52	518.769	2	14	1.1.1.350.3	1	21.5427	0	-1
7	19.57	sp|Q5AUT0|EGLC_EMENI	Probable glucan endo-1,3-beta-glucosidase eglC OS=Emericella nidulans (strain FGSC A4 / ATCC 38163 / CBS 112.46 / NRRL 194 / M139) GN=eglC PE=1 SV=1	99	ALFDESVQK			-0.613906	1034.91	518.462	1035.52	518.769	2	13	1.1.1.352.3	1	21.7484	0	-1
7	19.57	sp|Q5AUT0|EGLC_EMENI	Probable glucan endo-1,3-beta-glucosidase eglC OS=Emericella nidulans (strain FGSC A4 / ATCC 38163 / CBS 112.46 / NRRL 194 / M139) GN=eglC PE=1 SV=1	99	ALFDESVQK			0.148092	1035.67	518.843	1035.52	518.769	2	13	1.1.1.359.4	1	22.3985	0	-1
7	19.57	sp|Q5AUT0|EGLC_EMENI	Probable glucan endo-1,3-beta-glucosidase eglC OS=Emericella nidulans (strain FGSC A4 / ATCC 38163 / CBS 112.46 / NRRL 194 / M139) GN=eglC PE=1 SV=1	99	ALFDESVQK			-0.593786	1034.93	518.472	1035.52	518.769	2	12	1.1.1.353.3	1	21.851	0	-1
7	19.57	sp|Q5AUT0|EGLC_EMENI	Probable glucan endo-1,3-beta-glucosidase eglC OS=Emericella nidulans (strain FGSC A4 / ATCC 38163 / CBS 112.46 / NRRL 194 / M139) GN=eglC PE=1 SV=1	99	ALFDESVQK			0.330879	1035.85	518.935	1035.52	518.769	2	15	1.1.1.348.3	1	21.3369	0	-1
7	19.57	sp|Q5AUT0|EGLC_EMENI	Probable glucan endo-1,3-beta-glucosidase eglC OS=Emericella nidulans (strain FGSC A4 / ATCC 38163 / CBS 112.46 / NRRL 194 / M139) GN=eglC PE=1 SV=1	99	ALFDESVQK			-0.630124	1034.89	518.454	1035.52	518.769	2	14	1.1.1.346.3	1	21.166	0	-1
7	19.57	sp|Q5AUT0|EGLC_EMENI	Probable glucan endo-1,3-beta-glucosidase eglC OS=Emericella nidulans (strain FGSC A4 / ATCC 38163 / CBS 112.46 / NRRL 194 / M139) GN=eglC PE=1 SV=1	99	ALFDESVQK			0.327099	1035.85	518.933	1035.52	518.769	2	14	1.1.1.349.3	1	21.4398	0	-1
7	19.57	sp|Q5AUT0|EGLC_EMENI	Probable glucan endo-1,3-beta-glucosidase eglC OS=Emericella nidulans (strain FGSC A4 / ATCC 38163 / CBS 112.46 / NRRL 194 / M139) GN=eglC PE=1 SV=1	99	ALFDESVQK			0.101633	1035.63	518.82	1035.52	518.769	2	12	1.1.1.363.4	1	22.8097	0	-1
7	19.57	sp|Q5AUT0|EGLC_EMENI	Probable glucan endo-1,3-beta-glucosidase eglC OS=Emericella nidulans (strain FGSC A4 / ATCC 38163 / CBS 112.46 / NRRL 194 / M139) GN=eglC PE=1 SV=1	99	ALFDESVQK			0.10773	1035.63	518.823	1035.52	518.769	2	10	1.1.1.382.4	1	24.5897	0	-1
7	19.57	sp|Q5AUT0|EGLC_EMENI	Probable glucan endo-1,3-beta-glucosidase eglC OS=Emericella nidulans (strain FGSC A4 / ATCC 38163 / CBS 112.46 / NRRL 194 / M139) GN=eglC PE=1 SV=1	99	ALFDESVQK			0.102487	1035.63	518.82	1035.52	518.769	2	9	1.1.1.423.4	1	27.7268	0	-1
7	19.57	sp|Q5AUT0|EGLC_EMENI	Probable glucan endo-1,3-beta-glucosidase eglC OS=Emericella nidulans (strain FGSC A4 / ATCC 38163 / CBS 112.46 / NRRL 194 / M139) GN=eglC PE=1 SV=1	99	ALFDESVQK			0.104316	1035.63	518.821	1035.52	518.769	2	10	1.1.1.369.4	1	23.3225	0	-1
7	19.57	sp|Q5AUT0|EGLC_EMENI	Probable glucan endo-1,3-beta-glucosidase eglC OS=Emericella nidulans (strain FGSC A4 / ATCC 38163 / CBS 112.46 / NRRL 194 / M139) GN=eglC PE=1 SV=1	99	ALFDESVQK			-0.647683	1034.88	518.445	1035.52	518.769	2	13	1.1.1.351.3	1	21.6456	0	-1
7	19.57	sp|Q5AUT0|EGLC_EMENI	Probable glucan endo-1,3-beta-glucosidase eglC OS=Emericella nidulans (strain FGSC A4 / ATCC 38163 / CBS 112.46 / NRRL 194 / M139) GN=eglC PE=1 SV=1	99	ALFDESVQK			0.232962	1035.76	518.886	1035.52	518.769	2	11	1.1.1.373.4	1	23.7338	0	-1
7	19.57	sp|Q5AUT0|EGLC_EMENI	Probable glucan endo-1,3-beta-glucosidase eglC OS=Emericella nidulans (strain FGSC A4 / ATCC 38163 / CBS 112.46 / NRRL 194 / M139) GN=eglC PE=1 SV=1	99	ALFDESVQK			0.232108	1035.76	518.885	1035.52	518.769	2	10	1.1.1.388.4	1	25.0676	0	-1
7	19.57	sp|Q5AUT0|EGLC_EMENI	Probable glucan endo-1,3-beta-glucosidase eglC OS=Emericella nidulans (strain FGSC A4 / ATCC 38163 / CBS 112.46 / NRRL 194 / M139) GN=eglC PE=1 SV=1	99	ALFDESVQK			0.0894394	1035.61	518.814	1035.52	518.769	2	10	1.1.1.380.4	1	24.384	0	-1
7	19.57	sp|Q5AUT0|EGLC_EMENI	Probable glucan endo-1,3-beta-glucosidase eglC OS=Emericella nidulans (strain FGSC A4 / ATCC 38163 / CBS 112.46 / NRRL 194 / M139) GN=eglC PE=1 SV=1	98.84	ALFDESVQK			0.116266	1035.64	518.827	1035.52	518.769	2	9	1.1.1.419.4	1	27.4548	0	-1
7	19.57	sp|Q5AUT0|EGLC_EMENI	Probable glucan endo-1,3-beta-glucosidase eglC OS=Emericella nidulans (strain FGSC A4 / ATCC 38163 / CBS 112.46 / NRRL 194 / M139) GN=eglC PE=1 SV=1	98.68	ALFDESVQK			0.166383	1035.69	518.852	1035.52	518.769	2	9	1.1.1.372.4	1	23.631	0	-1
7	19.57	sp|Q5AUT0|EGLC_EMENI	Probable glucan endo-1,3-beta-glucosidase eglC OS=Emericella nidulans (strain FGSC A4 / ATCC 38163 / CBS 112.46 / NRRL 194 / M139) GN=eglC PE=1 SV=1	97.99	ALFDESVQK			0.0940731	1035.62	518.816	1035.52	518.769	2	9	1.1.1.366.4	1	23.0486	0	-1
7	19.57	sp|Q5AUT0|EGLC_EMENI	Probable glucan endo-1,3-beta-glucosidase eglC OS=Emericella nidulans (strain FGSC A4 / ATCC 38163 / CBS 112.46 / NRRL 194 / M139) GN=eglC PE=1 SV=1	97.46	ALFDESVQK	Methyl(E)@5		-0.66898	1048.87	525.442	1049.54	525.777	2	12	1.1.1.374.3	1	23.8018	0	-1
7	19.57	sp|Q5AUT0|EGLC_EMENI	Probable glucan endo-1,3-beta-glucosidase eglC OS=Emericella nidulans (strain FGSC A4 / ATCC 38163 / CBS 112.46 / NRRL 194 / M139) GN=eglC PE=1 SV=1	95.5	ALFDESVQK			0.145897	1035.67	518.842	1035.52	518.769	2	9	1.1.1.362.4	1	22.7069	0	-1
7	19.57	sp|Q5AUT0|EGLC_EMENI	Probable glucan endo-1,3-beta-glucosidase eglC OS=Emericella nidulans (strain FGSC A4 / ATCC 38163 / CBS 112.46 / NRRL 194 / M139) GN=eglC PE=1 SV=1	92.66	ALFDESVQK			0.117242	1035.64	518.828	1035.52	518.769	2	9	1.1.1.421.4	1	27.5907	0	-1
7	19.57	sp|Q5AUT0|EGLC_EMENI	Probable glucan endo-1,3-beta-glucosidase eglC OS=Emericella nidulans (strain FGSC A4 / ATCC 38163 / CBS 112.46 / NRRL 194 / M139) GN=eglC PE=1 SV=1	91.26	ALFDESVQK	Methyl(E)@5		0.0532659	1049.59	525.804	1049.54	525.777	2	11	1.1.1.373.3	1	23.699	0	-1
7	19.57	sp|Q5AUT0|EGLC_EMENI	Probable glucan endo-1,3-beta-glucosidase eglC OS=Emericella nidulans (strain FGSC A4 / ATCC 38163 / CBS 112.46 / NRRL 194 / M139) GN=eglC PE=1 SV=1	87.83	ALFDESVQK			0.11968	1035.64	518.829	1035.52	518.769	2	8	1.1.1.403.4	1	26.3314	0	-1
7	19.57	sp|Q5AUT0|EGLC_EMENI	Probable glucan endo-1,3-beta-glucosidase eglC OS=Emericella nidulans (strain FGSC A4 / ATCC 38163 / CBS 112.46 / NRRL 194 / M139) GN=eglC PE=1 SV=1	81.21	ALFDESVQK			0.106511	1035.63	518.822	1035.52	518.769	2	8	1.1.1.417.4	1	27.3187	0	-1
7	19.57	sp|Q5AUT0|EGLC_EMENI	Probable glucan endo-1,3-beta-glucosidase eglC OS=Emericella nidulans (strain FGSC A4 / ATCC 38163 / CBS 112.46 / NRRL 194 / M139) GN=eglC PE=1 SV=1	80.97	ALFDESVQK			0.153214	1035.68	518.846	1035.52	518.769	2	8	1.1.1.390.4	1	25.2036	0	-1
7	19.57	sp|Q5AUT0|EGLC_EMENI	Probable glucan endo-1,3-beta-glucosidase eglC OS=Emericella nidulans (strain FGSC A4 / ATCC 38163 / CBS 112.46 / NRRL 194 / M139) GN=eglC PE=1 SV=1	76.8	ALFDESVQK			0.0235923	1035.55	518.781	1035.52	518.769	2	8	1.1.1.445.4	1	29.2909	0	-1
7	19.57	sp|Q5AUT0|EGLC_EMENI	Probable glucan endo-1,3-beta-glucosidase eglC OS=Emericella nidulans (strain FGSC A4 / ATCC 38163 / CBS 112.46 / NRRL 194 / M139) GN=eglC PE=1 SV=1	74.19	ALFDESVQK			0.100536	1035.62	518.819	1035.52	518.769	2	8	1.1.1.418.4	1	27.3868	0	-1
7	19.57	sp|Q5AUT0|EGLC_EMENI	Probable glucan endo-1,3-beta-glucosidase eglC OS=Emericella nidulans (strain FGSC A4 / ATCC 38163 / CBS 112.46 / NRRL 194 / M139) GN=eglC PE=1 SV=1	68.09	ALFDESVQK			0.0952925	1035.62	518.817	1035.52	518.769	2	8	1.1.1.433.4	1	28.4412	0	-1
7	19.57	sp|Q5AUT0|EGLC_EMENI	Probable glucan endo-1,3-beta-glucosidase eglC OS=Emericella nidulans (strain FGSC A4 / ATCC 38163 / CBS 112.46 / NRRL 194 / M139) GN=eglC PE=1 SV=1	64.79	ALFDESVQK			0.0768797	1035.6	518.808	1035.52	518.769	2	6	1.1.1.442.4	1	29.0871	0	-1
7	19.57	sp|Q5AUT0|EGLC_EMENI	Probable glucan endo-1,3-beta-glucosidase eglC OS=Emericella nidulans (strain FGSC A4 / ATCC 38163 / CBS 112.46 / NRRL 194 / M139) GN=eglC PE=1 SV=1	62.55	ALFDESVQK			0.0327377	1035.56	518.785	1035.52	518.769	2	8	1.1.1.410.4	1	26.7729	0	-1
7	19.57	sp|Q5AUT0|EGLC_EMENI	Probable glucan endo-1,3-beta-glucosidase eglC OS=Emericella nidulans (strain FGSC A4 / ATCC 38163 / CBS 112.46 / NRRL 194 / M139) GN=eglC PE=1 SV=1	56.71	ALFDESVQK			0.110901	1035.63	518.825	1035.52	518.769	2	8	1.1.1.395.4	1	25.6478	0	-1
7	19.57	sp|Q5AUT0|EGLC_EMENI	Probable glucan endo-1,3-beta-glucosidase eglC OS=Emericella nidulans (strain FGSC A4 / ATCC 38163 / CBS 112.46 / NRRL 194 / M139) GN=eglC PE=1 SV=1	51.8	ALFDESVQK			1.07203	1036.6	519.305	1035.52	518.769	2	9	1.1.1.386.4	1	24.8967	0	-1
7	19.57	sp|Q5AUT0|EGLC_EMENI	Probable glucan endo-1,3-beta-glucosidase eglC OS=Emericella nidulans (strain FGSC A4 / ATCC 38163 / CBS 112.46 / NRRL 194 / M139) GN=eglC PE=1 SV=1	99	ALFDESVQKTK		missed K-T@9	-0.0238211	1264.64	633.329	1264.67	633.34	2	11	1.1.1.341.3	1	20.6865	0	-1
7	19.57	sp|Q5AUT0|EGLC_EMENI	Probable glucan endo-1,3-beta-glucosidase eglC OS=Emericella nidulans (strain FGSC A4 / ATCC 38163 / CBS 112.46 / NRRL 194 / M139) GN=eglC PE=1 SV=1	99	NLETTSGFNSAR			-0.0201714	1295.59	648.803	1295.61	648.813	2	17	1.1.1.328.4	1	19.5572	0	-1
7	19.57	sp|Q5AUT0|EGLC_EMENI	Probable glucan endo-1,3-beta-glucosidase eglC OS=Emericella nidulans (strain FGSC A4 / ATCC 38163 / CBS 112.46 / NRRL 194 / M139) GN=eglC PE=1 SV=1	99	NLETTSGFNSAR			-0.0107821	1295.6	648.807	1295.61	648.813	2	14	1.1.1.336.4	1	20.2069	0	-1
7	19.57	sp|Q5AUT0|EGLC_EMENI	Probable glucan endo-1,3-beta-glucosidase eglC OS=Emericella nidulans (strain FGSC A4 / ATCC 38163 / CBS 112.46 / NRRL 194 / M139) GN=eglC PE=1 SV=1	99	NLETTSGFNSAR			0.252972	1295.86	648.939	1295.61	648.813	2	13	1.1.1.330.3	1	19.7282	0	-1
7	19.57	sp|Q5AUT0|EGLC_EMENI	Probable glucan endo-1,3-beta-glucosidase eglC OS=Emericella nidulans (strain FGSC A4 / ATCC 38163 / CBS 112.46 / NRRL 194 / M139) GN=eglC PE=1 SV=1	99	TAKNLETTSGFNSAR		missed K-N@3	0.278901	1596.07	533.03	1595.79	532.937	3	15	1.1.1.323.4	1	19.1812	0	-1
7	19.57	sp|Q5AUT0|EGLC_EMENI	Probable glucan endo-1,3-beta-glucosidase eglC OS=Emericella nidulans (strain FGSC A4 / ATCC 38163 / CBS 112.46 / NRRL 194 / M139) GN=eglC PE=1 SV=1	99	TAKNLETTSGFNSAR		missed K-N@3	0.297192	1596.09	533.036	1595.79	532.937	3	15	1.1.1.319.3	1	18.8039	0	-1
7	19.57	sp|Q5AUT0|EGLC_EMENI	Probable glucan endo-1,3-beta-glucosidase eglC OS=Emericella nidulans (strain FGSC A4 / ATCC 38163 / CBS 112.46 / NRRL 194 / M139) GN=eglC PE=1 SV=1	99	TAKNLETTSGFNSAR		missed K-N@3	0.376941	1596.17	533.063	1595.79	532.937	3	14	1.1.1.322.4	1	19.0783	0	-1
7	19.57	sp|Q5AUT0|EGLC_EMENI	Probable glucan endo-1,3-beta-glucosidase eglC OS=Emericella nidulans (strain FGSC A4 / ATCC 38163 / CBS 112.46 / NRRL 194 / M139) GN=eglC PE=1 SV=1	17.08	TAKNLETTSGFNSAR	Deamidated(N)@4	missed K-N@3	0.457637	1597.23	533.418	1596.77	533.265	3	11	1.1.1.321.3	1	18.9752	0	-1
7	19.57	sp|Q5AUT0|EGLC_EMENI	Probable glucan endo-1,3-beta-glucosidase eglC OS=Emericella nidulans (strain FGSC A4 / ATCC 38163 / CBS 112.46 / NRRL 194 / M139) GN=eglC PE=1 SV=1	99	VQADFEAEFR			0.173883	1210.74	606.375	1210.56	606.288	2	15	1.1.1.377.3	1	24.0756	0	-1
7	19.57	sp|Q5AUT0|EGLC_EMENI	Probable glucan endo-1,3-beta-glucosidase eglC OS=Emericella nidulans (strain FGSC A4 / ATCC 38163 / CBS 112.46 / NRRL 194 / M139) GN=eglC PE=1 SV=1	99	VQADFEAEFR			-0.0118302	1210.55	606.282	1210.56	606.288	2	15	1.1.1.378.4	1	24.1784	0	-1
7	19.57	sp|Q5AUT0|EGLC_EMENI	Probable glucan endo-1,3-beta-glucosidase eglC OS=Emericella nidulans (strain FGSC A4 / ATCC 38163 / CBS 112.46 / NRRL 194 / M139) GN=eglC PE=1 SV=1	99	VQADFEAEFR			0.124254	1210.69	606.35	1210.56	606.288	2	14	1.1.1.379.3	1	24.2463	0	-1
7	19.57	sp|Q5AUT0|EGLC_EMENI	Probable glucan endo-1,3-beta-glucosidase eglC OS=Emericella nidulans (strain FGSC A4 / ATCC 38163 / CBS 112.46 / NRRL 194 / M139) GN=eglC PE=1 SV=1	99	VQADFEAEFR			0.180834	1210.74	606.379	1210.56	606.288	2	14	1.1.1.381.3	1	24.4521	0	-1
7	19.57	sp|Q5AUT0|EGLC_EMENI	Probable glucan endo-1,3-beta-glucosidase eglC OS=Emericella nidulans (strain FGSC A4 / ATCC 38163 / CBS 112.46 / NRRL 194 / M139) GN=eglC PE=1 SV=1	99	VQADFEAEFR			-0.026341	1210.54	606.275	1210.56	606.288	2	13	1.1.1.383.4	1	24.6925	0	-1
7	19.57	sp|Q5AUT0|EGLC_EMENI	Probable glucan endo-1,3-beta-glucosidase eglC OS=Emericella nidulans (strain FGSC A4 / ATCC 38163 / CBS 112.46 / NRRL 194 / M139) GN=eglC PE=1 SV=1	99	VQADFEAEFR			-0.0397543	1210.52	606.268	1210.56	606.288	2	13	1.1.1.384.4	1	24.7606	0	-1
7	19.57	sp|Q5AUT0|EGLC_EMENI	Probable glucan endo-1,3-beta-glucosidase eglC OS=Emericella nidulans (strain FGSC A4 / ATCC 38163 / CBS 112.46 / NRRL 194 / M139) GN=eglC PE=1 SV=1	99	VQADFEAEFR			-0.0886519	1210.47	606.244	1210.56	606.288	2	11	1.1.1.387.4	1	24.9648	0	-1
7	19.57	sp|Q5AUT0|EGLC_EMENI	Probable glucan endo-1,3-beta-glucosidase eglC OS=Emericella nidulans (strain FGSC A4 / ATCC 38163 / CBS 112.46 / NRRL 194 / M139) GN=eglC PE=1 SV=1	99	VQADFEAEFR			-0.0938953	1210.47	606.241	1210.56	606.288	2	10	1.1.1.438.4	1	28.8156	0	-1
8	10.45	sp|Q5AUR8|NPIIA_EMENI	Neutral protease 2 homolog AN7962 OS=Emericella nidulans (strain FGSC A4 / ATCC 38163 / CBS 112.46 / NRRL 194 / M139) GN=AN7962 PE=3 SV=1	99	ATALQTALR			1.39294	944.938	473.476	943.545	472.78	2	15	1.1.1.339.3	1	20.8725	0	-1
8	10.45	sp|Q5AUR8|NPIIA_EMENI	Neutral protease 2 homolog AN7962 OS=Emericella nidulans (strain FGSC A4 / ATCC 38163 / CBS 112.46 / NRRL 194 / M139) GN=AN7962 PE=3 SV=1	99	ATALQTALRNAASLASR	Deamidated(N)@10	missed R-N@9	-0.553668	1714.38	572.467	1714.93	572.651	3	21	1.1.1.436.3	1	30.525	0	-1
8	10.45	sp|Q5AUR8|NPIIA_EMENI	Neutral protease 2 homolog AN7962 OS=Emericella nidulans (strain FGSC A4 / ATCC 38163 / CBS 112.46 / NRRL 194 / M139) GN=AN7962 PE=3 SV=1	68.29	VSSCSGTRATALQTALR	Carbamidomethyl(C)@4	missed R-A@8	0.197756	1778.11	593.71	1777.91	593.644	3	11	1.1.1.337.4	1	20.7368	0	-1
8	10.45	sp|Q5AUR8|NPIIA_EMENI	Neutral protease 2 homolog AN7962 OS=Emericella nidulans (strain FGSC A4 / ATCC 38163 / CBS 112.46 / NRRL 194 / M139) GN=AN7962 PE=3 SV=1	99	ATALQTALR			1.34314	944.888	473.451	943.545	472.78	2	14	1.1.1.345.3	1	21.4892	0	-1
8	10.45	sp|Q5AUR8|NPIIA_EMENI	Neutral protease 2 homolog AN7962 OS=Emericella nidulans (strain FGSC A4 / ATCC 38163 / CBS 112.46 / NRRL 194 / M139) GN=AN7962 PE=3 SV=1	99	ATALQTALR			0.0399769	943.585	472.8	943.545	472.78	2	15	1.1.1.340.3	1	20.9753	0	-1
8	10.45	sp|Q5AUR8|NPIIA_EMENI	Neutral protease 2 homolog AN7962 OS=Emericella nidulans (strain FGSC A4 / ATCC 38163 / CBS 112.46 / NRRL 194 / M139) GN=AN7962 PE=3 SV=1	99	ATALQTALR			0.392577	943.938	472.976	943.545	472.78	2	10	1.1.1.364.3	1	23.4055	0	-1
8	10.45	sp|Q5AUR8|NPIIA_EMENI	Neutral protease 2 homolog AN7962 OS=Emericella nidulans (strain FGSC A4 / ATCC 38163 / CBS 112.46 / NRRL 194 / M139) GN=AN7962 PE=3 SV=1	99	ATALQTALR			0.347594	943.893	472.954	943.545	472.78	2	13	1.1.1.346.3	1	21.5919	0	-1
8	10.45	sp|Q5AUR8|NPIIA_EMENI	Neutral protease 2 homolog AN7962 OS=Emericella nidulans (strain FGSC A4 / ATCC 38163 / CBS 112.46 / NRRL 194 / M139) GN=AN7962 PE=3 SV=1	99	ATALQTALR			0.0641468	943.609	472.812	943.545	472.78	2	13	1.1.1.343.3	1	21.2837	0	-1
8	10.45	sp|Q5AUR8|NPIIA_EMENI	Neutral protease 2 homolog AN7962 OS=Emericella nidulans (strain FGSC A4 / ATCC 38163 / CBS 112.46 / NRRL 194 / M139) GN=AN7962 PE=3 SV=1	99	ATALQTALR			-0.146058	943.399	472.707	943.545	472.78	2	14	1.1.1.344.3	1	21.3864	0	-1
8	10.45	sp|Q5AUR8|NPIIA_EMENI	Neutral protease 2 homolog AN7962 OS=Emericella nidulans (strain FGSC A4 / ATCC 38163 / CBS 112.46 / NRRL 194 / M139) GN=AN7962 PE=3 SV=1	99	ATALQTALR			0.410582	943.956	472.985	943.545	472.78	2	11	1.1.1.359.3	1	22.892	0	-1
8	10.45	sp|Q5AUR8|NPIIA_EMENI	Neutral protease 2 homolog AN7962 OS=Emericella nidulans (strain FGSC A4 / ATCC 38163 / CBS 112.46 / NRRL 194 / M139) GN=AN7962 PE=3 SV=1	99	ATALQTALR			0.0645741	943.61	472.812	943.545	472.78	2	14	1.1.1.341.3	1	21.0781	0	-1
8	10.45	sp|Q5AUR8|NPIIA_EMENI	Neutral protease 2 homolog AN7962 OS=Emericella nidulans (strain FGSC A4 / ATCC 38163 / CBS 112.46 / NRRL 194 / M139) GN=AN7962 PE=3 SV=1	99	ATALQTALR			0.333739	943.879	472.947	943.545	472.78	2	12	1.1.1.347.3	1	21.6946	0	-1
8	10.45	sp|Q5AUR8|NPIIA_EMENI	Neutral protease 2 homolog AN7962 OS=Emericella nidulans (strain FGSC A4 / ATCC 38163 / CBS 112.46 / NRRL 194 / M139) GN=AN7962 PE=3 SV=1	99	ATALQTALR			0.316161	943.861	472.938	943.545	472.78	2	14	1.1.1.342.3	1	21.1809	0	-1
8	10.45	sp|Q5AUR8|NPIIA_EMENI	Neutral protease 2 homolog AN7962 OS=Emericella nidulans (strain FGSC A4 / ATCC 38163 / CBS 112.46 / NRRL 194 / M139) GN=AN7962 PE=3 SV=1	98.58	ATALQTALR			-0.0612194	943.484	472.749	943.545	472.78	2	12	1.1.1.360.3	1	22.9947	0	-1
8	10.45	sp|Q5AUR8|NPIIA_EMENI	Neutral protease 2 homolog AN7962 OS=Emericella nidulans (strain FGSC A4 / ATCC 38163 / CBS 112.46 / NRRL 194 / M139) GN=AN7962 PE=3 SV=1	98.21	ATALQTALR			0.339782	943.885	472.95	943.545	472.78	2	10	1.1.1.356.3	1	22.5838	0	-1
8	10.45	sp|Q5AUR8|NPIIA_EMENI	Neutral protease 2 homolog AN7962 OS=Emericella nidulans (strain FGSC A4 / ATCC 38163 / CBS 112.46 / NRRL 194 / M139) GN=AN7962 PE=3 SV=1	98.13	ATALQTALR			0.460997	944.006	473.01	943.545	472.78	2	10	1.1.1.349.3	1	21.8653	0	-1
8	10.45	sp|Q5AUR8|NPIIA_EMENI	Neutral protease 2 homolog AN7962 OS=Emericella nidulans (strain FGSC A4 / ATCC 38163 / CBS 112.46 / NRRL 194 / M139) GN=AN7962 PE=3 SV=1	96.99	ATALQTALR			-0.0162365	943.529	472.772	943.545	472.78	2	10	1.1.1.374.4	1	24.4673	0	-1
8	10.45	sp|Q5AUR8|NPIIA_EMENI	Neutral protease 2 homolog AN7962 OS=Emericella nidulans (strain FGSC A4 / ATCC 38163 / CBS 112.46 / NRRL 194 / M139) GN=AN7962 PE=3 SV=1	96.96	ATALQTALR			-0.0452282	943.5	472.757	943.545	472.78	2	10	1.1.1.376.4	1	24.6727	0	-1
8	10.45	sp|Q5AUR8|NPIIA_EMENI	Neutral protease 2 homolog AN7962 OS=Emericella nidulans (strain FGSC A4 / ATCC 38163 / CBS 112.46 / NRRL 194 / M139) GN=AN7962 PE=3 SV=1	96.44	ATALQTALR			-0.0190441	943.526	472.77	943.545	472.78	2	9	1.1.1.371.4	1	24.1592	0	-1
8	10.45	sp|Q5AUR8|NPIIA_EMENI	Neutral protease 2 homolog AN7962 OS=Emericella nidulans (strain FGSC A4 / ATCC 38163 / CBS 112.46 / NRRL 194 / M139) GN=AN7962 PE=3 SV=1	95.46	ATALQTALR			-0.0662243	943.479	472.747	943.545	472.78	2	7	1.1.1.414.4	1	28.5391	0	-1
8	10.45	sp|Q5AUR8|NPIIA_EMENI	Neutral protease 2 homolog AN7962 OS=Emericella nidulans (strain FGSC A4 / ATCC 38163 / CBS 112.46 / NRRL 194 / M139) GN=AN7962 PE=3 SV=1	93.99	ATALQTALR			-0.0770275	943.468	472.741	943.545	472.78	2	8	1.1.1.378.4	1	24.8782	0	-1
8	10.45	sp|Q5AUR8|NPIIA_EMENI	Neutral protease 2 homolog AN7962 OS=Emericella nidulans (strain FGSC A4 / ATCC 38163 / CBS 112.46 / NRRL 194 / M139) GN=AN7962 PE=3 SV=1	93.25	ATALQTALR			-0.0534069	943.492	472.753	943.545	472.78	2	8	1.1.1.375.4	1	24.57	0	-1
8	10.45	sp|Q5AUR8|NPIIA_EMENI	Neutral protease 2 homolog AN7962 OS=Emericella nidulans (strain FGSC A4 / ATCC 38163 / CBS 112.46 / NRRL 194 / M139) GN=AN7962 PE=3 SV=1	91.54	ATALQTALR			0.35736	943.902	472.959	943.545	472.78	2	9	1.1.1.363.3	1	23.3028	0	-1
8	10.45	sp|Q5AUR8|NPIIA_EMENI	Neutral protease 2 homolog AN7962 OS=Emericella nidulans (strain FGSC A4 / ATCC 38163 / CBS 112.46 / NRRL 194 / M139) GN=AN7962 PE=3 SV=1	90.96	ATALQTALR			-0.044862	943.5	472.757	943.545	472.78	2	9	1.1.1.385.4	1	25.5968	0	-1
8	10.45	sp|Q5AUR8|NPIIA_EMENI	Neutral protease 2 homolog AN7962 OS=Emericella nidulans (strain FGSC A4 / ATCC 38163 / CBS 112.46 / NRRL 194 / M139) GN=AN7962 PE=3 SV=1	90.7	ATALQTALR			0.026366	943.571	472.793	943.545	472.78	2	10	1.1.1.372.4	1	24.262	0	-1
8	10.45	sp|Q5AUR8|NPIIA_EMENI	Neutral protease 2 homolog AN7962 OS=Emericella nidulans (strain FGSC A4 / ATCC 38163 / CBS 112.46 / NRRL 194 / M139) GN=AN7962 PE=3 SV=1	90.34	ATALQTALR			-0.0434582	943.502	472.758	943.545	472.78	2	9	1.1.1.394.4	1	26.5207	0	-1
8	10.45	sp|Q5AUR8|NPIIA_EMENI	Neutral protease 2 homolog AN7962 OS=Emericella nidulans (strain FGSC A4 / ATCC 38163 / CBS 112.46 / NRRL 194 / M139) GN=AN7962 PE=3 SV=1	90.32	ATALQTALR			0.407348	943.952	472.983	943.545	472.78	2	11	1.1.1.350.3	1	21.9679	0	-1
8	10.45	sp|Q5AUR8|NPIIA_EMENI	Neutral protease 2 homolog AN7962 OS=Emericella nidulans (strain FGSC A4 / ATCC 38163 / CBS 112.46 / NRRL 194 / M139) GN=AN7962 PE=3 SV=1	88.51	ATALQTALR			0.415343	943.96	472.988	943.545	472.78	2	9	1.1.1.358.3	1	22.7892	0	-1
8	10.45	sp|Q5AUR8|NPIIA_EMENI	Neutral protease 2 homolog AN7962 OS=Emericella nidulans (strain FGSC A4 / ATCC 38163 / CBS 112.46 / NRRL 194 / M139) GN=AN7962 PE=3 SV=1	82.56	ATALQTALR			-0.0488293	943.496	472.755	943.545	472.78	2	7	1.1.1.379.4	1	24.9809	0	-1
8	10.45	sp|Q5AUR8|NPIIA_EMENI	Neutral protease 2 homolog AN7962 OS=Emericella nidulans (strain FGSC A4 / ATCC 38163 / CBS 112.46 / NRRL 194 / M139) GN=AN7962 PE=3 SV=1	81.49	ATALQTALR			0.383788	943.929	472.972	943.545	472.78	2	9	1.1.1.357.3	1	22.6865	0	-1
8	10.45	sp|Q5AUR8|NPIIA_EMENI	Neutral protease 2 homolog AN7962 OS=Emericella nidulans (strain FGSC A4 / ATCC 38163 / CBS 112.46 / NRRL 194 / M139) GN=AN7962 PE=3 SV=1	50.02	ATALQTALR			-0.011842	943.533	472.774	943.545	472.78	2	6	1.1.1.417.4	1	28.8471	0	-1
8	10.45	sp|Q5AUR8|NPIIA_EMENI	Neutral protease 2 homolog AN7962 OS=Emericella nidulans (strain FGSC A4 / ATCC 38163 / CBS 112.46 / NRRL 194 / M139) GN=AN7962 PE=3 SV=1	43.47	ATALQTALR			0.406737	943.952	472.983	943.545	472.78	2	8	1.1.1.361.3	1	23.0974	0	-1
8	10.45	sp|Q5AUR8|NPIIA_EMENI	Neutral protease 2 homolog AN7962 OS=Emericella nidulans (strain FGSC A4 / ATCC 38163 / CBS 112.46 / NRRL 194 / M139) GN=AN7962 PE=3 SV=1	38.81	ATALQTALR			-0.0162365	943.529	472.772	943.545	472.78	2	7	1.1.1.389.4	1	26.0073	0	-1
8	10.45	sp|Q5AUR8|NPIIA_EMENI	Neutral protease 2 homolog AN7962 OS=Emericella nidulans (strain FGSC A4 / ATCC 38163 / CBS 112.46 / NRRL 194 / M139) GN=AN7962 PE=3 SV=1	32.4	ATALQTALR			-0.0456554	943.499	472.757	943.545	472.78	2	6	1.1.1.395.4	1	26.6234	0	-1
8	10.45	sp|Q5AUR8|NPIIA_EMENI	Neutral protease 2 homolog AN7962 OS=Emericella nidulans (strain FGSC A4 / ATCC 38163 / CBS 112.46 / NRRL 194 / M139) GN=AN7962 PE=3 SV=1	28.68	ATALQTALR			0.296752	943.842	472.928	943.545	472.78	2	6	1.1.1.399.3	1	26.9643	0	-1
8	10.45	sp|Q5AUR8|NPIIA_EMENI	Neutral protease 2 homolog AN7962 OS=Emericella nidulans (strain FGSC A4 / ATCC 38163 / CBS 112.46 / NRRL 194 / M139) GN=AN7962 PE=3 SV=1	26.84	ATALQTALR			0.41278	943.958	472.986	943.545	472.78	2	7	1.1.1.362.3	1	23.2001	0	-1
8	10.45	sp|Q5AUR8|NPIIA_EMENI	Neutral protease 2 homolog AN7962 OS=Emericella nidulans (strain FGSC A4 / ATCC 38163 / CBS 112.46 / NRRL 194 / M139) GN=AN7962 PE=3 SV=1	21.58	ATALQTALR			-0.0542614	943.491	472.753	943.545	472.78	2	7	1.1.1.406.4	1	27.7178	0	-1
8	10.45	sp|Q5AUR8|NPIIA_EMENI	Neutral protease 2 homolog AN7962 OS=Emericella nidulans (strain FGSC A4 / ATCC 38163 / CBS 112.46 / NRRL 194 / M139) GN=AN7962 PE=3 SV=1	99	ATALQTALRNAASLASR	Deamidated(N)@10	missed R-N@9	0.0388609	1714.97	572.664	1714.93	572.651	3	18	1.1.1.377.4	1	24.7755	0	-1
8	10.45	sp|Q5AUR8|NPIIA_EMENI	Neutral protease 2 homolog AN7962 OS=Emericella nidulans (strain FGSC A4 / ATCC 38163 / CBS 112.46 / NRRL 194 / M139) GN=AN7962 PE=3 SV=1	99	ATALQTALRNAASLASR		missed R-N@9	0.54314	1714.49	572.505	1713.95	572.323	3	18	1.1.1.420.4	1	29.1576	0	-1
8	10.45	sp|Q5AUR8|NPIIA_EMENI	Neutral protease 2 homolog AN7962 OS=Emericella nidulans (strain FGSC A4 / ATCC 38163 / CBS 112.46 / NRRL 194 / M139) GN=AN7962 PE=3 SV=1	99	ATALQTALRNAASLASR		missed R-N@9	0.232227	1714.18	572.401	1713.95	572.323	3	21	1.1.1.427.3	1	29.6706	0	-1
8	10.45	sp|Q5AUR8|NPIIA_EMENI	Neutral protease 2 homolog AN7962 OS=Emericella nidulans (strain FGSC A4 / ATCC 38163 / CBS 112.46 / NRRL 194 / M139) GN=AN7962 PE=3 SV=1	99	ATALQTALRNAASLASR		missed R-N@9	0.178943	1714.13	572.383	1713.95	572.323	3	20	1.1.1.428.4	1	29.8081	0	-1
8	10.45	sp|Q5AUR8|NPIIA_EMENI	Neutral protease 2 homolog AN7962 OS=Emericella nidulans (strain FGSC A4 / ATCC 38163 / CBS 112.46 / NRRL 194 / M139) GN=AN7962 PE=3 SV=1	99	ATALQTALRNAASLASR	Deamidated(Q)@5	missed R-N@9	-0.813495	1714.12	572.38	1714.93	572.651	3	19	1.1.1.429.4	1	29.876	0	-1
8	10.45	sp|Q5AUR8|NPIIA_EMENI	Neutral protease 2 homolog AN7962 OS=Emericella nidulans (strain FGSC A4 / ATCC 38163 / CBS 112.46 / NRRL 194 / M139) GN=AN7962 PE=3 SV=1	99	ATALQTALRNAASLASR	Deamidated(Q)@5	missed R-N@9	0.131512	1715.06	572.695	1714.93	572.651	3	20	1.1.1.431.4	1	30.0813	0	-1
8	10.45	sp|Q5AUR8|NPIIA_EMENI	Neutral protease 2 homolog AN7962 OS=Emericella nidulans (strain FGSC A4 / ATCC 38163 / CBS 112.46 / NRRL 194 / M139) GN=AN7962 PE=3 SV=1	99	ATALQTALRNAASLASR	Deamidated(Q)@5	missed R-N@9	-1.01033	1713.92	572.315	1714.93	572.651	3	16	1.1.1.434.4	1	30.3545	0	-1
8	10.45	sp|Q5AUR8|NPIIA_EMENI	Neutral protease 2 homolog AN7962 OS=Emericella nidulans (strain FGSC A4 / ATCC 38163 / CBS 112.46 / NRRL 194 / M139) GN=AN7962 PE=3 SV=1	99	ATALQTALRNAASLASR	Deamidated(N)@10	missed R-N@9	0.254559	1715.19	572.736	1714.93	572.651	3	20	1.1.1.437.4	1	30.6625	0	-1
8	10.45	sp|Q5AUR8|NPIIA_EMENI	Neutral protease 2 homolog AN7962 OS=Emericella nidulans (strain FGSC A4 / ATCC 38163 / CBS 112.46 / NRRL 194 / M139) GN=AN7962 PE=3 SV=1	99	ATALQTALRNAASLASR	Deamidated(N)@10	missed R-N@9	0.404156	1715.34	572.786	1714.93	572.651	3	18	1.1.1.438.3	1	30.7304	0	-1
9	62.34	sp|Q9HEY7|SODC_EMENI	Superoxide dismutase [Cu-Zn] OS=Emericella nidulans (strain FGSC A4 / ATCC 38163 / CBS 112.46 / NRRL 194 / M139) GN=sodA PE=1 SV=3	99	HVGDLGNFKTDAEGNSK		missed K-T@9	0.204277	1788.05	597.023	1787.84	596.955	3	19	1.1.1.343.4	1	20.0105	0	-1
9	62.34	sp|Q9HEY7|SODC_EMENI	Superoxide dismutase [Cu-Zn] OS=Emericella nidulans (strain FGSC A4 / ATCC 38163 / CBS 112.46 / NRRL 194 / M139) GN=sodA PE=1 SV=3	99	LIGAESVLGR			0.305485	1013.89	507.954	1013.59	507.801	2	17	1.1.1.384.3	1	23.4218	0	-1
9	62.34	sp|Q9HEY7|SODC_EMENI	Superoxide dismutase [Cu-Zn] OS=Emericella nidulans (strain FGSC A4 / ATCC 38163 / CBS 112.46 / NRRL 194 / M139) GN=sodA PE=1 SV=3	97.58	HVGDLGNFKTDAEGNSKGSK	Deamidated(N)@15	missed K-T@9; missed K-G@17	1.68086	2062.66	516.672	2060.98	516.251	4	14	1.1.1.337.3	1	19.4637	0	-1
9	62.34	sp|Q9HEY7|SODC_EMENI	Superoxide dismutase [Cu-Zn] OS=Emericella nidulans (strain FGSC A4 / ATCC 38163 / CBS 112.46 / NRRL 194 / M139) GN=sodA PE=1 SV=3	78.22	HVGDLGNFK			0.369947	985.868	493.941	985.498	493.756	2	9	1.1.1.345.3	1	20.1812	0	-1
9	62.34	sp|Q9HEY7|SODC_EMENI	Superoxide dismutase [Cu-Zn] OS=Emericella nidulans (strain FGSC A4 / ATCC 38163 / CBS 112.46 / NRRL 194 / M139) GN=sodA PE=1 SV=3	25.82	HVGDLGNFK			0.463697	985.962	493.988	985.498	493.756	2	8	1.1.1.346.3	1	20.284	0	-1
9	62.34	sp|Q9HEY7|SODC_EMENI	Superoxide dismutase [Cu-Zn] OS=Emericella nidulans (strain FGSC A4 / ATCC 38163 / CBS 112.46 / NRRL 194 / M139) GN=sodA PE=1 SV=3	99	HVGDLGNFKTDAEGNSK	Deamidated(N)@15	missed K-T@9	-0.597	1788.23	597.084	1788.83	597.283	3	16	1.1.1.341.3	1	19.8397	0	-1
9	62.34	sp|Q9HEY7|SODC_EMENI	Superoxide dismutase [Cu-Zn] OS=Emericella nidulans (strain FGSC A4 / ATCC 38163 / CBS 112.46 / NRRL 194 / M139) GN=sodA PE=1 SV=3	99	HVGDLGNFKTDAEGNSK	Deamidated(N)@7	missed K-T@9	-0.439346	1788.39	597.137	1788.83	597.283	3	15	1.1.1.340.3	1	19.737	0	-1
9	62.34	sp|Q9HEY7|SODC_EMENI	Superoxide dismutase [Cu-Zn] OS=Emericella nidulans (strain FGSC A4 / ATCC 38163 / CBS 112.46 / NRRL 194 / M139) GN=sodA PE=1 SV=3	93.52	HVGDLGNFKTDAEGNSKGSK		missed K-T@9; missed K-G@17	0.48104	2060.47	516.126	2059.99	516.005	4	13	1.1.1.335.3	1	19.2583	0	-1
9	62.34	sp|Q9HEY7|SODC_EMENI	Superoxide dismutase [Cu-Zn] OS=Emericella nidulans (strain FGSC A4 / ATCC 38163 / CBS 112.46 / NRRL 194 / M139) GN=sodA PE=1 SV=3	99	LIGAESVLGR			0.403691	1013.99	508.003	1013.59	507.801	2	16	1.1.1.380.3	1	23.046	0	-1
9	62.34	sp|Q9HEY7|SODC_EMENI	Superoxide dismutase [Cu-Zn] OS=Emericella nidulans (strain FGSC A4 / ATCC 38163 / CBS 112.46 / NRRL 194 / M139) GN=sodA PE=1 SV=3	99	LIGAESVLGR			0.331913	1013.92	507.967	1013.59	507.801	2	15	1.1.1.381.3	1	23.114	0	-1
9	62.34	sp|Q9HEY7|SODC_EMENI	Superoxide dismutase [Cu-Zn] OS=Emericella nidulans (strain FGSC A4 / ATCC 38163 / CBS 112.46 / NRRL 194 / M139) GN=sodA PE=1 SV=3	99	LIGAESVLGR			0.409123	1014	508.005	1013.59	507.801	2	15	1.1.1.382.3	1	23.2165	0	-1
9	62.34	sp|Q9HEY7|SODC_EMENI	Superoxide dismutase [Cu-Zn] OS=Emericella nidulans (strain FGSC A4 / ATCC 38163 / CBS 112.46 / NRRL 194 / M139) GN=sodA PE=1 SV=3	99	LIGAESVLGR			0.268315	1013.86	507.935	1013.59	507.801	2	14	1.1.1.387.3	1	23.6951	0	-1
9	62.34	sp|Q9HEY7|SODC_EMENI	Superoxide dismutase [Cu-Zn] OS=Emericella nidulans (strain FGSC A4 / ATCC 38163 / CBS 112.46 / NRRL 194 / M139) GN=sodA PE=1 SV=3	99	LIGAESVLGR			0.362919	1013.95	507.982	1013.59	507.801	2	10	1.1.1.464.3	1	30.9694	0	-1
9	62.34	sp|Q9HEY7|SODC_EMENI	Superoxide dismutase [Cu-Zn] OS=Emericella nidulans (strain FGSC A4 / ATCC 38163 / CBS 112.46 / NRRL 194 / M139) GN=sodA PE=1 SV=3	99	LIGAESVLGR			1.3097	1014.9	508.456	1013.59	507.801	2	12	1.1.1.389.3	1	23.9004	0	-1
9	62.34	sp|Q9HEY7|SODC_EMENI	Superoxide dismutase [Cu-Zn] OS=Emericella nidulans (strain FGSC A4 / ATCC 38163 / CBS 112.46 / NRRL 194 / M139) GN=sodA PE=1 SV=3	99	LIGAESVLGR			1.1427	1014.73	508.372	1013.59	507.801	2	11	1.1.1.417.3	1	26.5654	0	-1
9	62.34	sp|Q9HEY7|SODC_EMENI	Superoxide dismutase [Cu-Zn] OS=Emericella nidulans (strain FGSC A4 / ATCC 38163 / CBS 112.46 / NRRL 194 / M139) GN=sodA PE=1 SV=3	99	LIGAESVLGR	Methyl(E)@5		0.0548497	1027.66	514.836	1027.6	514.809	2	14	1.1.1.397.3	1	24.6867	0	-1
9	62.34	sp|Q9HEY7|SODC_EMENI	Superoxide dismutase [Cu-Zn] OS=Emericella nidulans (strain FGSC A4 / ATCC 38163 / CBS 112.46 / NRRL 194 / M139) GN=sodA PE=1 SV=3	99	LIGAESVLGR			0.240727	1013.83	507.921	1013.59	507.801	2	11	1.1.1.397.4	1	24.7215	0	-1
9	62.34	sp|Q9HEY7|SODC_EMENI	Superoxide dismutase [Cu-Zn] OS=Emericella nidulans (strain FGSC A4 / ATCC 38163 / CBS 112.46 / NRRL 194 / M139) GN=sodA PE=1 SV=3	99	LIGAESVLGR			0.272526	1013.86	507.937	1013.59	507.801	2	9	1.1.1.485.3	1	32.8798	0	-1
9	62.34	sp|Q9HEY7|SODC_EMENI	Superoxide dismutase [Cu-Zn] OS=Emericella nidulans (strain FGSC A4 / ATCC 38163 / CBS 112.46 / NRRL 194 / M139) GN=sodA PE=1 SV=3	99	LIGAESVLGR	Methyl(E)@5		0.0190831	1027.62	514.818	1027.6	514.809	2	14	1.1.1.398.3	1	24.7894	0	-1
9	62.34	sp|Q9HEY7|SODC_EMENI	Superoxide dismutase [Cu-Zn] OS=Emericella nidulans (strain FGSC A4 / ATCC 38163 / CBS 112.46 / NRRL 194 / M139) GN=sodA PE=1 SV=3	99	LIGAESVLGR			0.247319	1013.83	507.924	1013.59	507.801	2	9	1.1.1.456.3	1	30.2532	0	-1
9	62.34	sp|Q9HEY7|SODC_EMENI	Superoxide dismutase [Cu-Zn] OS=Emericella nidulans (strain FGSC A4 / ATCC 38163 / CBS 112.46 / NRRL 194 / M139) GN=sodA PE=1 SV=3	99	LIGAESVLGR			0.342106	1013.93	507.972	1013.59	507.801	2	9	1.1.1.438.3	1	28.6504	0	-1
9	62.34	sp|Q9HEY7|SODC_EMENI	Superoxide dismutase [Cu-Zn] OS=Emericella nidulans (strain FGSC A4 / ATCC 38163 / CBS 112.46 / NRRL 194 / M139) GN=sodA PE=1 SV=3	99	LIGAESVLGR			0.33228	1013.92	507.967	1013.59	507.801	2	9	1.1.1.472.3	1	31.7204	0	-1
9	62.34	sp|Q9HEY7|SODC_EMENI	Superoxide dismutase [Cu-Zn] OS=Emericella nidulans (strain FGSC A4 / ATCC 38163 / CBS 112.46 / NRRL 194 / M139) GN=sodA PE=1 SV=3	99	LIGAESVLGR			0.289677	1013.88	507.946	1013.59	507.801	2	9	1.1.1.439.3	1	28.753	0	-1
9	62.34	sp|Q9HEY7|SODC_EMENI	Superoxide dismutase [Cu-Zn] OS=Emericella nidulans (strain FGSC A4 / ATCC 38163 / CBS 112.46 / NRRL 194 / M139) GN=sodA PE=1 SV=3	99	LIGAESVLGR			0.340886	1013.93	507.971	1013.59	507.801	2	10	1.1.1.424.3	1	27.2838	0	-1
9	62.34	sp|Q9HEY7|SODC_EMENI	Superoxide dismutase [Cu-Zn] OS=Emericella nidulans (strain FGSC A4 / ATCC 38163 / CBS 112.46 / NRRL 194 / M139) GN=sodA PE=1 SV=3	99	LIGAESVLGR			-0.795894	1012.79	507.403	1013.59	507.801	2	8	1.1.1.406.3	1	25.5409	0	-1
9	62.34	sp|Q9HEY7|SODC_EMENI	Superoxide dismutase [Cu-Zn] OS=Emericella nidulans (strain FGSC A4 / ATCC 38163 / CBS 112.46 / NRRL 194 / M139) GN=sodA PE=1 SV=3	98.76	LIGAESVLGR			0.272892	1013.86	507.937	1013.59	507.801	2	9	1.1.1.427.3	1	27.5915	0	-1
9	62.34	sp|Q9HEY7|SODC_EMENI	Superoxide dismutase [Cu-Zn] OS=Emericella nidulans (strain FGSC A4 / ATCC 38163 / CBS 112.46 / NRRL 194 / M139) GN=sodA PE=1 SV=3	98.57	LIGAESVLGR			0.349308	1013.94	507.975	1013.59	507.801	2	10	1.1.1.425.3	1	27.3863	0	-1
9	62.34	sp|Q9HEY7|SODC_EMENI	Superoxide dismutase [Cu-Zn] OS=Emericella nidulans (strain FGSC A4 / ATCC 38163 / CBS 112.46 / NRRL 194 / M139) GN=sodA PE=1 SV=3	96.65	LIGAESVLGR			0.28748	1013.87	507.945	1013.59	507.801	2	7	1.1.1.482.3	1	32.6416	0	-1
9	62.34	sp|Q9HEY7|SODC_EMENI	Superoxide dismutase [Cu-Zn] OS=Emericella nidulans (strain FGSC A4 / ATCC 38163 / CBS 112.46 / NRRL 194 / M139) GN=sodA PE=1 SV=3	96.28	LIGAESVLGR			0.285099	1013.87	507.943	1013.59	507.801	2	8	1.1.1.445.3	1	29.3335	0	-1
9	62.34	sp|Q9HEY7|SODC_EMENI	Superoxide dismutase [Cu-Zn] OS=Emericella nidulans (strain FGSC A4 / ATCC 38163 / CBS 112.46 / NRRL 194 / M139) GN=sodA PE=1 SV=3	93.76	LIGAESVLGR			0.304875	1013.89	507.953	1013.59	507.801	2	9	1.1.1.430.3	1	27.8646	0	-1
9	62.34	sp|Q9HEY7|SODC_EMENI	Superoxide dismutase [Cu-Zn] OS=Emericella nidulans (strain FGSC A4 / ATCC 38163 / CBS 112.46 / NRRL 194 / M139) GN=sodA PE=1 SV=3	93.66	LIGAESVLGR			1.37708	1014.96	508.489	1013.59	507.801	2	9	1.1.1.399.3	1	24.8573	0	-1
9	62.34	sp|Q9HEY7|SODC_EMENI	Superoxide dismutase [Cu-Zn] OS=Emericella nidulans (strain FGSC A4 / ATCC 38163 / CBS 112.46 / NRRL 194 / M139) GN=sodA PE=1 SV=3	92.4	LIGAESVLGR			0.0313152	1013.62	507.816	1013.59	507.801	2	9	1.1.1.411.3	1	25.9498	0	-1
9	62.34	sp|Q9HEY7|SODC_EMENI	Superoxide dismutase [Cu-Zn] OS=Emericella nidulans (strain FGSC A4 / ATCC 38163 / CBS 112.46 / NRRL 194 / M139) GN=sodA PE=1 SV=3	91.69	LIGAESVLGR			0.250309	1013.84	507.926	1013.59	507.801	2	7	1.1.1.446.3	1	29.4361	0	-1
9	62.34	sp|Q9HEY7|SODC_EMENI	Superoxide dismutase [Cu-Zn] OS=Emericella nidulans (strain FGSC A4 / ATCC 38163 / CBS 112.46 / NRRL 194 / M139) GN=sodA PE=1 SV=3	91.19	LIGAESVLGR			0.0197185	1013.61	507.811	1013.59	507.801	2	7	1.1.1.369.4	1	22.2291	0	-1
9	62.34	sp|Q9HEY7|SODC_EMENI	Superoxide dismutase [Cu-Zn] OS=Emericella nidulans (strain FGSC A4 / ATCC 38163 / CBS 112.46 / NRRL 194 / M139) GN=sodA PE=1 SV=3	88.02	LIGAESVLGR			-0.0284993	1013.56	507.786	1013.59	507.801	2	7	1.1.1.487.4	1	33.0849	0	-1
9	62.34	sp|Q9HEY7|SODC_EMENI	Superoxide dismutase [Cu-Zn] OS=Emericella nidulans (strain FGSC A4 / ATCC 38163 / CBS 112.46 / NRRL 194 / M139) GN=sodA PE=1 SV=3	79.61	LIGAESVLGR			1.21772	1014.8	508.41	1013.59	507.801	2	9	1.1.1.394.3	1	24.3789	0	-1
9	62.34	sp|Q9HEY7|SODC_EMENI	Superoxide dismutase [Cu-Zn] OS=Emericella nidulans (strain FGSC A4 / ATCC 38163 / CBS 112.46 / NRRL 194 / M139) GN=sodA PE=1 SV=3	78.45	LIGAESVLGR			0.332524	1013.92	507.967	1013.59	507.801	2	7	1.1.1.475.3	1	31.9934	0	-1
9	62.34	sp|Q9HEY7|SODC_EMENI	Superoxide dismutase [Cu-Zn] OS=Emericella nidulans (strain FGSC A4 / ATCC 38163 / CBS 112.46 / NRRL 194 / M139) GN=sodA PE=1 SV=3	77.67	LIGAESVLGR			0.27509	1013.86	507.938	1013.59	507.801	2	8	1.1.1.455.3	1	30.1854	0	-1
9	62.34	sp|Q9HEY7|SODC_EMENI	Superoxide dismutase [Cu-Zn] OS=Emericella nidulans (strain FGSC A4 / ATCC 38163 / CBS 112.46 / NRRL 194 / M139) GN=sodA PE=1 SV=3	62.43	LIGAESVLGR			0.328495	1013.92	507.965	1013.59	507.801	2	7	1.1.1.436.3	1	28.4453	0	-1
9	62.34	sp|Q9HEY7|SODC_EMENI	Superoxide dismutase [Cu-Zn] OS=Emericella nidulans (strain FGSC A4 / ATCC 38163 / CBS 112.46 / NRRL 194 / M139) GN=sodA PE=1 SV=3	41.06	LIGAESVLGR			0.297306	1013.88	507.949	1013.59	507.801	2	7	1.1.1.479.3	1	32.3687	0	-1
9	62.34	sp|Q9HEY7|SODC_EMENI	Superoxide dismutase [Cu-Zn] OS=Emericella nidulans (strain FGSC A4 / ATCC 38163 / CBS 112.46 / NRRL 194 / M139) GN=sodA PE=1 SV=3	39.99	LIGAESVLGR			0.33228	1013.92	507.967	1013.59	507.801	2	6	1.1.1.426.3	1	27.4889	0	-1
9	62.34	sp|Q9HEY7|SODC_EMENI	Superoxide dismutase [Cu-Zn] OS=Emericella nidulans (strain FGSC A4 / ATCC 38163 / CBS 112.46 / NRRL 194 / M139) GN=sodA PE=1 SV=3	35.72	LIGAESVLGR			0.286686	1013.87	507.944	1013.59	507.801	2	6	1.1.1.473.3	1	31.823	0	-1
9	62.34	sp|Q9HEY7|SODC_EMENI	Superoxide dismutase [Cu-Zn] OS=Emericella nidulans (strain FGSC A4 / ATCC 38163 / CBS 112.46 / NRRL 194 / M139) GN=sodA PE=1 SV=3	32.45	LIGAESVLGR			0.268681	1013.86	507.935	1013.59	507.801	2	6	1.1.1.471.3	1	31.6179	0	-1
9	62.34	sp|Q9HEY7|SODC_EMENI	Superoxide dismutase [Cu-Zn] OS=Emericella nidulans (strain FGSC A4 / ATCC 38163 / CBS 112.46 / NRRL 194 / M139) GN=sodA PE=1 SV=3	99	THGAPEDEVR			0.306717	1109.82	555.916	1109.51	555.762	2	11	1.1.1.305.3	1	16.3871	0	-1

## Sheet: Sheet 2
	Summary table of the proteins identified from the fermentation broth of carbon starved cultures.
	Red and blue colors indicate upregulated and downregulated genes, respectively.
	a - According to Aspergillus Genome Database (http://www.aspgd.org/).
	b - According to the reference(s) mentioned at the definition of the appropriate gene group in the Materials and methods chapter of the manuscript.
	c - This study
	d - According to Spitzmüller et al. (2015) [39].
GENEID	Gene namea	Featurea	Descriptionb	Secretom data		Transcriptom data
				Presence in carbon starved culturesc	Presence in lactose containing culturesd	log2FC values			Regulation (up=1, down=-1)
						Lactose containing cultures	Arabinogalactan containing cultures	Carbon starved cultures	Culture specific gene
						vs.	vs.	vs.	Glucose	Lactose	Arabinogalactan	No carbon source
						Glucose containing cultures	Glucose containing cultures	Glucose containing cultures
AN8007	abnC	Protein with arabinan endo-1,5-alpha-L-arabinosidase activity, involved in degradation of pectin	endo-alfa-1,5-L-arabinosidase	yes	yes	3.08872	5.37931	5.7381	-1
AN3418	eglB	Protein with cellulase activity, involved in degradation of glucans	endo-beta-1,4-glucanase	yes	yes	3.67633	6.74306	0.779922			1
AN4102	bglA	Putative beta-glucosidase; induced by carbon starvation-induced autophagy	beta-glucosidase	yes		0.674113	1.80811	1.03077
AN2828	bglL	Putative beta-glucosidase with a predicted role in polysaccharide degradation	beta-glucosidase	yes		6.08523	8.68989	8.27311	-1
AN4871	chiB	Class V chitinase; glycoside hydrolase family 18 (GH18) protein with a role in the age-dependent autolysis	Chitinases	yes		1.01253	6.86695	8.20175	-1			1
AN7950	eglC	Putative glucan endo-1,3-beta-D-glucosidase with predicted role in degradation of glucans; glycosyl phosphatidylinositol (GPI)-linked protein	exo-1,3-beta-glucanase	yes		-1.97102	-3.81498	-3.58781	1
AN7962	pepJ	Extracellular deuterolysin-type metallo-proteinase	extracellular proteinase	yes	yes	5.9631	10.6515	10.9492	-1
AN8445		Putative aminopeptidase Y; transcript is induced by nitrate	extracellular proteinase		yes	-0.324865	1.32274	0.930106
AN9339	catB	Hyphal catalase with a predicted role in gluconic acid and gluconate metabolism	catalase	yes	yes	-2.6961	-3.55509	-4.17767	1
AN0241	sodA	Cu/Zn-superoxide dismutase; induced under iron starvation and repressed under copper starvation	Cu/Zn-superoxide dismutase	yes	yes	0.343528	-0.289943	-1.4307				-1
