# Supplementary material for: Strategies Shaping the Transcription of Carbohydrate-Active Enzyme Genes in Aspergillus nidulans
Source: J Fungi (Basel). 2022 Jan 14;8(1):79. doi: 10.3390/jof8010079 (PMC8780418; doi:10.3390/jof8010079)
Supplement: Supplementary file 1 [file jof-08-00079-s001.zip › jof-1527581-supplementary/Table S5.xlsx]

## Sheet: Overview
	Table S5 RT-qPCR data of selected genes and principal component analysis of the RNAseq data.
	Sheet 1	RT-qPCR data of selected genes.
		Table contains relative transcription data (DCP) calculated from three independent experiments using the AN6700 (putative translation elongation factor) gene as reference.
		g, l, a, s – Significant difference (Student's t-test, p < 0.05) from the data of cultures containing glucose, lactose, arabinogalactan or no carbon source, respectively.
	Sheet 2	Correlation between RNAseq and RT-qPCR data.
		Relative transcription (DCP) of 28 genes at the four different culturing conditions were determined and correlated with their rlog value calculated from the RNA sequencing data sets.
		The Pearson's correlation coefficient was 0.79.
	Sheet 3	Principal component (PC) analysis of the RNAseq data.
		The analysis was carried out using the rlog data generated by the DESeq2 software.

## Sheet: Sheet 1
	RT-qPCR data of selected genes.
	Table contains relative transcription data (DCP) calculated from three independent experiments using the AN6700 (putative translation elongation factor) gene as reference.
	g, l, a, s – Significant difference (Student's t-test, p < 0.05) from the data of cultures containing glucose, lactose, arabinogalactan or no carbon source, respectively.
	Lactose utilization genes								Antioxidative enzyme genes								Carbon starvation stress response genes								Other genes
	Gene		Culturing conditions	DCP			Significance		Gene		Culturing conditions	DCP			Significance		Gene		Culturing conditions	DCP			Significance		Gene		Culturing conditions	DCP			Significance
				mean	±	S.D.						mean		S.D.						mean	±	S.D.						mean		S.D.
	AN0423	xyrA	Glucose containing culture	-5.12667	±	0.0814453	l,a,s		AN0241	sodA	Glucose containing culture	0.516667	±	0.120139	s		AN0973	brlA	Glucose containing culture	-4.76333	±	0.587566	l,a,s		AN0399	nrtB	Glucose containing culture	-1.49333	±	0.202073	l,a,s
			Lactose containing culture	-3.07333	±	0.484183	g,a				Lactose containing culture	0.02	±	0.655057					Lactose containing culture	-2.79333	±	0.248261	g				Lactose containing culture	-2.66333	±	0.261598	g,a,s
			Arabinogalactan containing culture	0.273333	±	0.733303	g,l,s				Arabinogalactan containing culture	0.403333	±	0.295691	s				Arabinogalactan containing culture	-0.92	±	1.13662	g				Arabinogalactan containing culture	-6.92	±	0.392301	g,l
			Carbon starved culture	-2.78	±	0.220681	g,a				Carbon starved culture	-0.826667	±	0.235443	g,a				Carbon starved culture	-2.36333	±	0.715565	g				Carbon starved culture	-6.97333	±	0.282902	g,l
	AN0756	lacA	Glucose containing culture	-8.96333	±	0.372201	l,a		AN3581	trxR	Glucose containing culture	-6.07	±	0.452106	a,s		AN1414	xprG	Glucose containing culture	-3.08667	±	0.0305505	l,a,s		AN1006	niaD	Glucose containing culture	-0.59	±	0.0888819	l,a,s
			Lactose containing culture	-7.62667	±	0.449926	g,s				Lactose containing culture	-6.68667	±	0.0907377	a,s				Lactose containing culture	-2.43667	±	0.150444	g,a,s				Lactose containing culture	-3.27333	±	0.425245	g,a,s
			Arabinogalactan containing culture	-7.71	±	0.376431	g,s				Arabinogalactan containing culture	-7.08667	±	0.179536	g,l,s				Arabinogalactan containing culture	-1.50333	±	0.281839	g,l				Arabinogalactan containing culture	-9.77	±	0.183576	g,l,s
			Carbon starved culture	-9.69667	±	0.228108	l,a				Carbon starved culture	-7.6	±	0.14	g,l,a				Carbon starved culture	-1.76333	±	0.061101	g,l				Carbon starved culture	-10.8033	±	0.365011	g,l,a
	AN0942	ladA	Glucose containing culture	-8.61333	±	0.575007	l,a,s		AN8218	trxB	Glucose containing culture	-6.04	±	0.115326	l,a,s		AN4871	chiB	Glucose containing culture	-0.856667	±	0.74715	l,a,s		AN1812	jlbA	Glucose containing culture	0.923333	±	0.110604	s
			Lactose containing culture	-5.89	±	0.216333	g,s				Lactose containing culture	-3.13	±	0.27	g,a,s				Lactose containing culture	0.81	±	0.53507	g				Lactose containing culture	1.05667	±	0.104083	s
			Arabinogalactan containing culture	-4.62333	±	1.03761	g,s				Arabinogalactan containing culture	-2.24667	±	0.353034	g,l,s				Arabinogalactan containing culture	1.13333	±	0.330807	g				Arabinogalactan containing culture	0.316667	±	0.353034
			Carbon starved culture	-0.846667	±	0.416213	g,l,a				Carbon starved culture	-5.11333	±	0.335012	g,l,a				Carbon starved culture	1.01667	±	0.497024	g				Carbon starved culture	-0.34	±	0.185203	g,l
	AN2463	lacF	Glucose containing culture	-9.94	±	0.421426	l,a		AN8692	prxA	Glucose containing culture	0.683333	±	0.0288675	l,a,s		AN8445		Glucose containing culture	-1.34	±	0.370405	a		AN6542	actA	Glucose containing culture	-0.393333	±	0.169214	l,a,s
			Lactose containing culture	-7.73667	±	0.280238	g,a,s				Lactose containing culture	-1.49333	±	0.0873689	g				Lactose containing culture	-1.70667	±	0.345591	a,s				Lactose containing culture	-1.44667	±	0.224796	g,s
			Arabinogalactan containing culture	-5.87	±	0.384318	g,l,s				Arabinogalactan containing culture	-1.78333	±	0.253837	g				Arabinogalactan containing culture	-0.0666667	±	0.40104	g,l				Arabinogalactan containing culture	-1.63333	±	0.277909	g
			Carbon starved culture	-9.16667	±	0.314696	l,a				Carbon starved culture	-2.93	±	0.667008	g				Carbon starved culture	-0.593333	±	0.266333	l				Carbon starved culture	-2.13	±	0.204206	g,l
	AN2814	lacpB	Glucose containing culture	-13.2767	±	0.310215	l,a,s		AN9339	catB	Glucose containing culture	2.13333	±	0.107858	l,a,s										AN6838	tubC	Glucose containing culture	-3.25667	±	0.181751	l,a,s
			Lactose containing culture	-5.98333	±	1.02676	g,s				Lactose containing culture	-0.833333	±	0.273922	g,a,s												Lactose containing culture	-4.04667	±	0.250267	g,s
			Arabinogalactan containing culture	-6.96333	±	0.851724	g,s				Arabinogalactan containing culture	-1.83333	±	0.284312	g,l												Arabinogalactan containing culture	-4.23667	±	0.376342	g,s
			Carbon starved culture	-8.79333	±	0.561456	g,l,a				Carbon starved culture	-2.45333	±	0.350761	g,l												Carbon starved culture	-5.73667	±	0.611337	g,l,a
	AN3199	lacpA	Glucose containing culture	-10.51	±	1.15547	l,a		AN10220	ccp1	Glucose containing culture	-3.85333	±	0.300888	l,a,s										AN9397	hacA	Glucose containing culture	-1.33667	±	0.185562	l,a,s
			Lactose containing culture	-5.45667	±	0.382143	g,s				Lactose containing culture	-5.05	±	0.360971	g												Lactose containing culture	-0.943333	±	0.137961	g,a,s
			Arabinogalactan containing culture	-4.66333	±	0.704012	g,s				Arabinogalactan containing culture	-5.25	±	0.167033	g												Arabinogalactan containing culture	0.746667	±	0.400666	g,l
			Carbon starved culture	-10.96	±	1.28969	l,a				Carbon starved culture	-5.85	±	0.391535	g												Carbon starved culture	0.886667	±	0.0907377	g,l
	AN3201	lacD	Glucose containing culture	-14.9733	±	0.329596	l,a
			Lactose containing culture	-8.30667	±	0.412836	g,s
			Arabinogalactan containing culture	-9.39667	±	0.595725	g,s
			Carbon starved culture	-14.9433	±	0.301386	l,a
	AN4957	galE	Glucose containing culture	-12.18	±	0.779487	a,s
			Lactose containing culture	-10.9467	±	0.321299	a,s
			Arabinogalactan containing culture	-9.47	±	0.294618	g,l
			Carbon starved culture	-9.73333	±	0.235867	g,l
	AN6388	lacE	Glucose containing culture	-9.26333	±	0.241316	l,a,s
			Lactose containing culture	-8.36667	±	0.0832666	g
			Arabinogalactan containing culture	-8.10333	±	0.488092	g
			Carbon starved culture	-8.17333	±	0.506392	g
	AN9064	xdhA	Glucose containing culture	-4.17667	±	0.57492	l,a,s
			Lactose containing culture	-1.61333	±	0.666658	g
			Arabinogalactan containing culture	-2.32333	±	0.535195	g
			Carbon starved culture	-2.72667	±	0.235018	g
	AN10543	galX	Glucose containing culture	-7.46667	±	0.462313	l
			Lactose containing culture	-1.10667	±	0.651562	g,a,s
			Arabinogalactan containing culture	-7.95	±	0.759408	l
			Carbon starved culture	-8.11667	±	0.270247	l
	AN10550	galR	Glucose containing culture	-9.11	±	0.715052	l
			Lactose containing culture	-2.76	±	0.3751	g,l,s
			Arabinogalactan containing culture	-9.04667	±	0.505206	l,s
			Carbon starved culture	-10.37	±	0.416773	l,a

## Sheet: Sheet 2
	Correlation between RNAseq and RT-qPCR data.
	Relative transcription (DCP) of 28 genes at the four different culturing conditions were determined and correlated with their rlog value calculated from the RNA sequencing data sets.
	The Pearson's correlation coefficient was 0.79.

## Sheet: Sheet 3
	Principal component (PC) analysis of the RNAseq data.
	The analysis was carried out using the rlog data generated by the DESeq2 software.
