# Supplementary material for: Strategies Shaping the Transcription of Carbohydrate-Active Enzyme Genes in Aspergillus nidulans
Source: J Fungi (Basel). 2022 Jan 14;8(1):79. doi: 10.3390/jof8010079 (PMC8780418; doi:10.3390/jof8010079)
Supplement: Supplementary file 1 [file jof-08-00079-s001.zip › jof-1527581-supplementary/Table S6.xlsx]

## Sheet: Overview
	Table S6 Results of the gene set enrichment analyses.
	Sheet 1	Lactose containing cultures vs. Glucose containing cultures
	Sheet 2	Arabinogalactan containing cultures vs. Glucose containing cultures
	Sheet 3	Carbon starved cultures vs. Glucose containing cultures
	Sheet 4	Terms characteristic for glucose containing cultures.
	Sheet 5	Terms characteristic for lactose containing cultures.
	Sheet 6	Terms characteristic for arabinogalactan containing cultures.
	Sheet 7	Terms characteristic for carbon starved cultures.

## Sheet: Sheet 1
Lactose containing cultures vs. Glucose containing cultures
upregulated genes
FunCat ID	FunCat description	FunCat main category	Gene ID(s)	Exact p-value	Adjusted p-value	# genes / category	# genes / input
1.2	secondary metabolism	Metabolism	ANIA_00036 | ANIA_00051 | ANIA_00147 | ANIA_00149 | ANIA_00150 | ANIA_00208 | ANIA_00216 | ANIA_00338 | ANIA_00370 | ANIA_00382 | ANIA_00423 | ANIA_00459 | ANIA_00501 | ANIA_00529 | ANIA_00533 | ANIA_00567 | ANIA_00586 | ANIA_00606 | ANIA_00608 | ANIA_00610 | ANIA_00613 | ANIA_00654 | ANIA_00675 | ANIA_00758 | ANIA_00761 | ANIA_00783 | ANIA_00793 | ANIA_01030 | ANIA_01035 | ANIA_01071 | ANIA_0108…	4.394368e-52	1.84124e-49	340 / 1068	340 / 1749
1.05	C-compound and carbohydrate metabolism	Metabolism	ANIA_00023 | ANIA_00024 | ANIA_00034 | ANIA_00036 | ANIA_00050 | ANIA_00100 | ANIA_00146 | ANIA_00180 | ANIA_00216 | ANIA_00221 | ANIA_00322 | ANIA_00370 | ANIA_00423 | ANIA_00501 | ANIA_00541 | ANIA_00554 | ANIA_00567 | ANIA_00574 | ANIA_00593 | ANIA_00608 | ANIA_00649 | ANIA_00667 | ANIA_00675 | ANIA_00712 | ANIA_00756 | ANIA_00758 | ANIA_00761 | ANIA_00765 | ANIA_00784 | ANIA_00788 | ANIA_0080…	5.95222e-19	1.24699e-16	236 / 919	236 / 1749
01.06.06.05	sesquiterpenes metabolism	Metabolism	ANIA_00338 | ANIA_00606 | ANIA_02040 | ANIA_03609 | ANIA_06407 | ANIA_06787 | ANIA_07818 | ANIA_07932 | ANIA_08309 | ANIA_09313 | ANIA_10573 | ANIA_10811 | ANIA_10887 | ANIA_11013	2.073992e-8	2.89668e-06	14 / 19	14 / 1749
20.09.18.07	non-vesicular cellular import	Cellular transport, transport facilitation and transport routes	ANIA_00250 | ANIA_00382 | ANIA_00497 | ANIA_00501 | ANIA_00614 | ANIA_00811 | ANIA_01073 | ANIA_01109 | ANIA_01185 | ANIA_01581 | ANIA_01681 | ANIA_02074 | ANIA_02344 | ANIA_02358 | ANIA_02372 | ANIA_02544 | ANIA_02665 | ANIA_02781 | ANIA_02814 | ANIA_02840 | ANIA_02869 | ANIA_03195 | ANIA_03199 | ANIA_03210 | ANIA_03220 | ANIA_03221 | ANIA_03990 | ANIA_04590 | ANIA_04604 | ANIA_04621 | ANIA_0462…	4.967148e-7	5.20309e-05	68 / 248	68 / 1749
01.01.09.04.02	degradation of phenylalanine	Metabolism	ANIA_00459 | ANIA_00649 | ANIA_00801 | ANIA_01809 | ANIA_01895 | ANIA_01897 | ANIA_01899 | ANIA_02674 | ANIA_02777 | ANIA_04643 | ANIA_05433 | ANIA_05990 | ANIA_06101 | ANIA_06414 | ANIA_06449 | ANIA_07631 | ANIA_07772 | ANIA_07824 | ANIA_10028 | ANIA_10259 | ANIA_10612 | ANIA_10657 | ANIA_10950 | ANIA_11034	7.178539e-7	6.01562e-05	24 / 56	24 / 1749
32.07.01	detoxification involving cytochrome P450	Cell rescue, defense and virulence	ANIA_00338 | ANIA_00459 | ANIA_01884 | ANIA_02040 | ANIA_02607 | ANIA_02706 | ANIA_03256 | ANIA_03570 | ANIA_03609 | ANIA_04643 | ANIA_05433 | ANIA_05665 | ANIA_06407 | ANIA_06414 | ANIA_06449 | ANIA_06787 | ANIA_07772 | ANIA_07808 | ANIA_07824 | ANIA_07932 | ANIA_08184 | ANIA_08250 | ANIA_08309 | ANIA_08437 | ANIA_08438 | ANIA_08615 | ANIA_09313 | ANIA_10028 | ANIA_10259 | ANIA_10573 | ANIA_1088…	9.615944e-7	6.71513e-05	32 / 88	32 / 1749
01.05.02.07	sugar, glucoside, polyol and carboxylate catabolism	Metabolism	ANIA_00423 | ANIA_00613 | ANIA_00667 | ANIA_00675 | ANIA_00712 | ANIA_00942 | ANIA_01273 | ANIA_01274 | ANIA_01477 | ANIA_01602 | ANIA_01870 | ANIA_01885 | ANIA_02378 | ANIA_02463 | ANIA_02533 | ANIA_02534 | ANIA_02666 | ANIA_02801 | ANIA_02828 | ANIA_02834 | ANIA_03046 | ANIA_03200 | ANIA_03201 | ANIA_03297 | ANIA_03312 | ANIA_03368 | ANIA_03613 | ANIA_03860 | ANIA_03903 | ANIA_04114 | ANIA_0433…	1.40823e-06	8.33244e-05	64 / 235	64 / 1749
1.06	lipid, fatty acid and isoprenoid metabolism	Metabolism	ANIA_00034 | ANIA_00147 | ANIA_00180 | ANIA_00216 | ANIA_00322 | ANIA_00370 | ANIA_00525 | ANIA_00554 | ANIA_00563 | ANIA_00664 | ANIA_00666 | ANIA_00783 | ANIA_01294 | ANIA_01314 | ANIA_01433 | ANIA_01580 | ANIA_01840 | ANIA_01872 | ANIA_01877 | ANIA_01884 | ANIA_02002 | ANIA_02372 | ANIA_02393 | ANIA_02558 | ANIA_02573 | ANIA_02577 | ANIA_02602 | ANIA_02607 | ANIA_02662 | ANIA_02716 | ANIA_0281…	1.59092e-06	8.33244e-05	138 / 624	138 / 1749
01.20.05.11	metabolism of polyketides	Metabolism	ANIA_00150 | ANIA_01036 | ANIA_03386 | ANIA_03887 | ANIA_06000 | ANIA_06431 | ANIA_06444 | ANIA_06961 | ANIA_06962 | ANIA_07071 | ANIA_07815 | ANIA_07825 | ANIA_07903 | ANIA_07909 | ANIA_08383 | ANIA_08513 | ANIA_09005 | ANIA_10297 | ANIA_10430 | ANIA_10486	1.98742e-06	9.25255e-05	20 / 44	20 / 1749
01.01.09.04.01	biosynthesis of phenylalanine	Metabolism	ANIA_00459 | ANIA_00649 | ANIA_00801 | ANIA_01899 | ANIA_02674 | ANIA_04643 | ANIA_05433 | ANIA_05990 | ANIA_06101 | ANIA_06414 | ANIA_06449 | ANIA_07164 | ANIA_07631 | ANIA_07772 | ANIA_07824 | ANIA_10028 | ANIA_10259 | ANIA_10599 | ANIA_10602 | ANIA_10657 | ANIA_10950 | ANIA_11034	2.71377e-06	0.000113707	22 / 52	22 / 1749
32.05.05.01	toxins	Cell rescue, defense and virulence	ANIA_00338 | ANIA_00541 | ANIA_02040 | ANIA_03609 | ANIA_06407 | ANIA_06787 | ANIA_07613 | ANIA_07819 | ANIA_07932 | ANIA_08025 | ANIA_08309 | ANIA_08433 | ANIA_08615 | ANIA_09313 | ANIA_09390 | ANIA_10430 | ANIA_10573 | ANIA_10887	3.1148e-06	0.000118646	18 / 38	18 / 1749
32.05.03	defense related proteins	Cell rescue, defense and virulence	ANIA_00554 | ANIA_01433 | ANIA_01519 | ANIA_03037 | ANIA_03256 | ANIA_04643 | ANIA_04893 | ANIA_05327 | ANIA_05665 | ANIA_06383 | ANIA_06389 | ANIA_06449 | ANIA_06470 | ANIA_07897 | ANIA_08105 | ANIA_08139 | ANIA_08141 | ANIA_08184 | ANIA_08250 | ANIA_08437 | ANIA_08969 | ANIA_09034 | ANIA_09129 | ANIA_09253 | ANIA_10057 | ANIA_10124	3.41453e-06	0.000119224	26 / 68	26 / 1749
01.05.03	polysaccharide metabolism	Metabolism	ANIA_00221 | ANIA_00423 | ANIA_00541 | ANIA_00712 | ANIA_00799 | ANIA_01046 | ANIA_01273 | ANIA_01477 | ANIA_01602 | ANIA_01604 | ANIA_01742 | ANIA_01852 | ANIA_01870 | ANIA_02359 | ANIA_02463 | ANIA_02828 | ANIA_03046 | ANIA_03200 | ANIA_03201 | ANIA_03368 | ANIA_03418 | ANIA_03790 | ANIA_03860 | ANIA_03903 | ANIA_04040 | ANIA_04507 | ANIA_04573 | ANIA_04825 | ANIA_04871 | ANIA_05061 | ANIA_0528…	1.1518e-05	0.000371234	61 / 234	61 / 1749
01.20.36	non-ribosomal peptide synthesis	Metabolism	ANIA_00150 | ANIA_01242 | ANIA_02064 | ANIA_02924 | ANIA_06444 | ANIA_06961 | ANIA_07815 | ANIA_08105 | ANIA_08433 | ANIA_08513 | ANIA_09129 | ANIA_09243 | ANIA_10297 | ANIA_10486 | ANIA_10576	5.93841e-05	0.00177728	15 / 34	15 / 1749
16.05	polysaccharide binding	Protein with binding function or cofactor requirement (structural or analytic)	ANIA_00221 | ANIA_00541 | ANIA_01604 | ANIA_01852 | ANIA_03790 | ANIA_04871 | ANIA_05061 | ANIA_05364 | ANIA_05454 | ANIA_06389 | ANIA_07401 | ANIA_07613 | ANIA_09380 | ANIA_09390	7.65886e-05	0.00213529	14 / 31	14 / 1749
1.07	metabolism of vitamins, cofactors, and prosthetic groups	Metabolism	ANIA_00050 | ANIA_00586 | ANIA_00765 | ANIA_00942 | ANIA_01129 | ANIA_01563 | ANIA_01611 | ANIA_01685 | ANIA_01822 | ANIA_01899 | ANIA_02250 | ANIA_02393 | ANIA_02666 | ANIA_02786 | ANIA_02813 | ANIA_03228 | ANIA_03249 | ANIA_04018 | ANIA_04055 | ANIA_04336 | ANIA_05653 | ANIA_05977 | ANIA_06314 | ANIA_06525 | ANIA_06931 | ANIA_07128 | ANIA_07268 | ANIA_08142 | ANIA_08351 | ANIA_08356 | ANIA_0858…	8.15386e-05	0.00213529	39 / 139	39 / 1749
20.09.18	cellular import	Cellular transport, transport facilitation and transport routes	ANIA_00135 | ANIA_00250 | ANIA_00497 | ANIA_00614 | ANIA_00811 | ANIA_01073 | ANIA_01109 | ANIA_01185 | ANIA_01581 | ANIA_01681 | ANIA_02344 | ANIA_02372 | ANIA_02591 | ANIA_02601 | ANIA_02663 | ANIA_02665 | ANIA_02781 | ANIA_02814 | ANIA_02869 | ANIA_03195 | ANIA_03199 | ANIA_03210 | ANIA_03221 | ANIA_03915 | ANIA_03990 | ANIA_04124 | ANIA_04277 | ANIA_04590 | ANIA_04604 | ANIA_04621 | ANIA_0462…	0.000139544	0.00343934	69 / 295	69 / 1749
20.01.23	allantoin and allantoate transport	Cellular transport, transport facilitation and transport routes	ANIA_00497 | ANIA_00614 | ANIA_00811 | ANIA_01185 | ANIA_01681 | ANIA_02344 | ANIA_03195 | ANIA_03221 | ANIA_04628 | ANIA_04826 | ANIA_06778 | ANIA_08595 | ANIA_08623 | ANIA_08814 | ANIA_08936 | ANIA_08955 | ANIA_09010 | ANIA_09336 | ANIA_09392 | ANIA_09456 | ANIA_10075 | ANIA_10487 | ANIA_11153 | ANIA_11189	0.000225124	0.00524039	24 / 75	24 / 1749
01.06.05	fatty acid metabolism	Metabolism	ANIA_00146 | ANIA_00322 | ANIA_00370 | ANIA_00574 | ANIA_00784 | ANIA_01822 | ANIA_01886 | ANIA_02573 | ANIA_02577 | ANIA_02716 | ANIA_03318 | ANIA_03380 | ANIA_03575 | ANIA_03862 | ANIA_03880 | ANIA_04009 | ANIA_04690 | ANIA_05269 | ANIA_05287 | ANIA_05373 | ANIA_05402 | ANIA_05737 | ANIA_06450 | ANIA_06649 | ANIA_06918 | ANIA_07128 | ANIA_07806 | ANIA_07814 | ANIA_07815 | ANIA_08163 | ANIA_0840…	0.000456763	0.0100728	43 / 170	43 / 1749
32.07	detoxification	Cell rescue, defense and virulence	ANIA_00024 | ANIA_00100 | ANIA_00147 | ANIA_00785 | ANIA_00788 | ANIA_01174 | ANIA_01724 | ANIA_01877 | ANIA_02558 | ANIA_02629 | ANIA_02651 | ANIA_02669 | ANIA_02707 | ANIA_02788 | ANIA_03227 | ANIA_03329 | ANIA_03383 | ANIA_03488 | ANIA_03741 | ANIA_03849 | ANIA_04019 | ANIA_04151 | ANIA_05310 | ANIA_05400 | ANIA_05421 | ANIA_05763 | ANIA_06399 | ANIA_06417 | ANIA_06451 | ANIA_06808 | ANIA_0681…	0.000577951	0.0121081	51 / 213	51 / 1749
01.20.35.01.01	metabolism of melanins	Metabolism	ANIA_00146 | ANIA_00784 | ANIA_06450 | ANIA_06918 | ANIA_07806 | ANIA_07912 | ANIA_08435 | ANIA_10049 | ANIA_10122 | ANIA_10335	0.000779841	0.0154806	10 / 22	10 / 1749
2.16	fermentation	Energy	ANIA_00024 | ANIA_00423 | ANIA_01868 | ANIA_02158 | ANIA_02860 | ANIA_03205 | ANIA_04114 | ANIA_04829 | ANIA_05887 | ANIA_06525 | ANIA_06808 | ANIA_07068 | ANIA_07805 | ANIA_08356 | ANIA_09034 | ANIA_09288 | ANIA_11030	0.000841066	0.0154806	17 / 50	17 / 1749
20.01.03	C-compound and carbohydrate transport	Cellular transport, transport facilitation and transport routes	ANIA_00208 | ANIA_00250 | ANIA_00382 | ANIA_00501 | ANIA_01109 | ANIA_01738 | ANIA_01839 | ANIA_01917 | ANIA_02358 | ANIA_02372 | ANIA_02544 | ANIA_02591 | ANIA_02601 | ANIA_02663 | ANIA_02665 | ANIA_02814 | ANIA_02840 | ANIA_02869 | ANIA_03199 | ANIA_03210 | ANIA_03220 | ANIA_03658 | ANIA_03915 | ANIA_03990 | ANIA_04124 | ANIA_04277 | ANIA_04590 | ANIA_04621 | ANIA_04630 | ANIA_05059 | ANIA_0527…	0.000849769	0.0154806	62 / 275	62 / 1749
01.20.17.03	metabolism of amines	Metabolism	ANIA_00567 | ANIA_02566 | ANIA_03291 | ANIA_03846 | ANIA_03960 | ANIA_05690 | ANIA_07267 | ANIA_07408 | ANIA_07641 | ANIA_07812 | ANIA_07998 | ANIA_08454 | ANIA_09011 | ANIA_09178	0.000974311	0.0170098	14 / 38	14 / 1749
32.10.09	degradation / modification of foreign (exogenous) ester compounds	Cell rescue, defense and virulence	ANIA_01294 | ANIA_03037 | ANIA_03559 | ANIA_05016 | ANIA_06383 | ANIA_06389 | ANIA_07407 | ANIA_09130	0.00123522	0.0207023	8 / 16	8 / 1749
02.16.09	mixed acid and butanediol fermentation	Energy	ANIA_02158 | ANIA_05373 | ANIA_08937 | ANIA_09288	0.00244345	0.0393002	4 / 5	4 / 1749
01.05.11.07.02	anaerobic aromate catabolism	Metabolism	ANIA_02075 | ANIA_05044 | ANIA_06130 | ANIA_07418 | ANIA_08370 | ANIA_10952 | ANIA_11187	0.00253247	0.0393002	7 / 14	7 / 1749
GO ID	GO name	GO namespace	Gene ID(s)	Exact p-value	Adjusted p-value	# genes / category	# genes / input
GO:0005576	extracellular region	CC	AN2534 | AN8007 | AN6525 | AN8149 | AN8138 | AN7152 | AN9035 | AN9286 | AN0554 | AN7962 | AN6093 | AN2632 | AN7908 | AN10482 | AN5976 | AN3903 | AN2828 | AN8401 | AN5282 | AN3418 | AN4871 | AN7331 | AN8006 | AN1602 | AN5267 | AN7388 | AN0756 | AN0667 | AN3297 | AN6427 | AN9276 | AN1742 | AN8761 | AN9045 | AN8891 | AN1685 | AN6106 | AN7135 | AN8803 | AN7807 | AN3613 | AN2359 | AN0423	3.766276e-15	1.160013e-12	43 / 127	43 / 1749
GO:0005975	carbohydrate metabolic process	BP	AN2534 | AN8007 | AN8149 | AN8138 | AN7152 | AN9035 | AN9286 | AN6093 | AN2632 | AN7908 | AN0712 | AN10482 | AN5976 | AN3903 | AN2828 | AN8401 | AN5282 | AN3418 | AN4871 | AN1602 | AN5267 | AN0756 | AN0667 | AN3297 | AN6427 | AN9276 | AN1742 | AN3368 | AN8761 | AN9045 | AN8891 | AN6106 | AN7135 | AN9064 | AN3613 | AN2359 | AN0423	3.565573e-14	5.490982e-12	37 / 100	37 / 1749
GO:0016798	hydrolase activity, acting on glycosyl bonds	MF	AN2534 | AN8007 | AN8149 | AN8138 | AN7152 | AN9035 | AN9286 | AN2632 | AN7908 | AN0712 | AN10482 | AN5976 | AN3903 | AN2828 | AN8401 | AN5282 | AN3418 | AN4871 | AN1602 | AN0756 | AN0667 | AN3297 | AN6427 | AN9276 | AN1742 | AN3368 | AN8761 | AN9045 | AN8891 | AN3613 | AN2359	1.138663e-13	1.169027e-11	31 / 73	31 / 1749
GO:0005575	cellular_component	CC	AN8007 | AN6525 | AN8149 | AN8138 | AN7152 | AN9035 | AN3741 | AN0554 | AN8777 | AN10233 | AN11015 | AN7962 | AN9274 | AN8667 | AN6093 | AN2632 | AN7908 | AN0712 | AN10482 | AN5976 | AN3903 | AN2828 | AN8401 | AN5282 | AN3418 | AN7895 | AN10380 | AN1602 | AN5267 | AN3380 | AN1897 | AN0756 | AN0005 | AN0667 | AN3297 | AN6427 | AN1742 | AN3368 | AN1414 | AN8761 | AN9045 | AN8891 | AN1685 | AN4069 |…	4.136319e-13	3.184966e-11	64 / 300	64 / 1749
GO:0004553	hydrolase activity, hydrolyzing O-glycosyl compounds	MF	AN2534 | AN8007 | AN8138 | AN7152 | AN9035 | AN9286 | AN0712 | AN10482 | AN5976 | AN3903 | AN2828 | AN8401 | AN5282 | AN3418 | AN4871 | AN1602 | AN0756 | AN0667 | AN3297 | AN6427 | AN9276 | AN1742 | AN3368 | AN3613 | AN2359	8.754048e-12	5.392493e-10	25 / 55	25 / 1749
GO:0045461	sterigmatocystin biosynthetic process	BP	AN7820 | AN0973 | AN7825 | AN7824 | AN7823 | AN7821 | AN7818 | AN7816 | AN7815 | AN7814 | AN11013 | AN7811 | AN7810 | AN7808 | AN7807 | AN7806 | AN7805 | AN7804	1.331798e-11	6.836563e-10	18 / 29	18 / 1749
GO:0008152	metabolic process	BP	AN2534 | AN8007 | AN6525 | AN8149 | AN8138 | AN7152 | AN9035 | AN9286 | AN0554 | AN11015 | AN2632 | AN7908 | AN0712 | AN10482 | AN5976 | AN3903 | AN2828 | AN8401 | AN5282 | AN3418 | AN4871 | AN1602 | AN3380 | AN0756 | AN0667 | AN3297 | AN6427 | AN9276 | AN1742 | AN3368 | AN8761 | AN9045 | AN8891 | AN1685 | AN7825 | AN7821 | AN7816 | AN7815 | AN7814 | AN7806 | AN3613 | AN2359	1.042923e-10	4.58886e-9	42 / 156	42 / 1749
GO:0000272	polysaccharide catabolic process	BP	AN2534 | AN8007 | AN8149 | AN8138 | AN7152 | AN9035 | AN9286 | AN6093 | AN2632 | AN7908 | AN0712 | AN10482 | AN5976 | AN3903 | AN2828 | AN8401 | AN5282 | AN3418 | AN4871 | AN1602 | AN5267 | AN0756 | AN1742 | AN3368 | AN6106 | AN7135 | AN3613 | AN2359	1.815822e-10	6.990916e-9	28 / 76	28 / 1749
GO:0019748	secondary metabolic process	BP	AN7895 | AN7825 | AN7824 | AN7821 | AN7818 | AN7816 | AN7815 | AN7814 | AN7811 | AN7808 | AN7807 | AN7806 | AN7805 | AN7804	3.193159e-10	1.09277e-8	14 / 20	14 / 1749
GO:0016491	oxidoreductase activity	MF	AN6525 | AN3741 | AN0554 | AN10233 | AN7895 | AN3380 | AN1897 | AN7388 | AN7824 | AN7823 | AN7821 | AN7818 | AN7815 | AN7814 | AN11013 | AN7811 | AN7810 | AN7808 | AN7806 | AN7805 | AN7804 | AN9064 | AN0423	1.564836e-8	4.819695e-7	23 / 63	23 / 1749
GO:0055114	oxidation-reduction process	BP	AN6525 | AN3741 | AN0554 | AN10233 | AN7895 | AN3380 | AN1897 | AN7388 | AN7824 | AN7823 | AN7821 | AN7818 | AN7815 | AN7814 | AN11013 | AN7811 | AN7810 | AN7808 | AN7806 | AN7805 | AN7804 | AN9064 | AN0423	2.96415e-7	8.29962e-06	23 / 72	23 / 1749
GO:0046355	mannan catabolic process	BP	AN8138 | AN7152 | AN0667 | AN3297 | AN6427 | AN3368	1.5369e-06	3.94472e-05	6 / 6	6 / 1749
GO:0016787	hydrolase activity	MF	AN2534 | AN8007 | AN8149 | AN8138 | AN7152 | AN9035 | AN9286 | AN8777 | AN7962 | AN6093 | AN2632 | AN7908 | AN0712 | AN10482 | AN5976 | AN3903 | AN2828 | AN8401 | AN5282 | AN3418 | AN4871 | AN10380 | AN1602 | AN5267 | AN0756 | AN0667 | AN3297 | AN6427 | AN9276 | AN1742 | AN3368 | AN8761 | AN9045 | AN8891 | AN1685 | AN7816 | AN7814 | AN3613 | AN2359	2.83882e-06	6.72582e-05	39 / 187	39 / 1749
GO:0045493	xylan catabolic process	BP	AN2534 | AN8007 | AN9286 | AN6093 | AN2632 | AN7908 | AN8401 | AN5267 | AN3613 | AN2359	3.36778e-06	7.40913e-05	10 / 18	10 / 1749
GO:0044550	secondary metabolite biosynthetic process	BP	AN3380 | AN7824 | AN7815 | AN7814 | AN7810 | AN7807 | AN7806	0.000155483	0.00319258	7 / 13	7 / 1749
GO:1900815	monodictyphenone biosynthetic process	BP	AN7820 | AN7825 | AN7810 | AN7807 | AN7806	0.000257449	0.00466437	5 / 7	5 / 1749
GO:0004497	monooxygenase activity	MF	AN7824 | AN7818 | AN11013 | AN7808 | AN7804	0.000257449	0.00466437	5 / 7	5 / 1749
GO:0019566	arabinose metabolic process	BP	AN2534 | AN8007 | AN2632 | AN7908 | AN0423	0.000626944	0.00981014	5 / 8	5 / 1749
GO:0042732	D-xylose metabolic process	BP	AN8401 | AN9064 | AN3613 | AN2359 | AN0423	0.000626944	0.00981014	5 / 8	5 / 1749
GO:0016705	oxidoreductase activity, acting on paired donors, with incorporation or reduction of molecular oxygen	MF	AN7824 | AN7818 | AN11013 | AN7808	0.000637022	0.00981014	4 / 5	4 / 1749
GO:0043605	cellular amide catabolic process	BP	AN8777 | AN2248 | AN7818	0.00130236	0.0167136	3 / 3	3 / 1749
GO:0042243	asexual spore wall assembly	BP	AN8006 | AN8803 | AN1937	0.00130236	0.0167136	3 / 3	3 / 1749
GO:0047911	galacturan 1,4-alpha-galacturonidase activity	MF	AN8761 | AN9045 | AN8891	0.00130236	0.0167136	3 / 3	3 / 1749
GO:2001307	xanthone-containing compound biosynthetic process	BP	AN7810 | AN7807 | AN7806	0.00130236	0.0167136	3 / 3	3 / 1749
GO:0030245	cellulose catabolic process	BP	AN6093 | AN0712 | AN10482 | AN5976 | AN3903 | AN2828 | AN5282 | AN3418 | AN1602	0.00140931	0.0173627	9 / 27	9 / 1749
GO:0016985	mannan endo-1,4-beta-mannosidase activity	MF	AN0667 | AN3297 | AN6427 | AN9276	0.00174994	0.0192494	4 / 6	4 / 1749
GO:0006012	galactose metabolic process	BP	AN8138 | AN7152 | AN9035 | AN0423	0.00174994	0.0192494	4 / 6	4 / 1749
GO:0016616	oxidoreductase activity, acting on the CH-OH group of donors, NAD or NADP as acceptor	MF	AN6525 | AN10233 | AN7821 | AN7805	0.00174994	0.0192494	4 / 6	4 / 1749
GO:0052692	raffinose alpha-galactosidase activity	MF	AN8138 | AN7152 | AN9035	0.00479193	0.0434093	3 / 4	3 / 1749
GO:1900563	dehydroaustinol biosynthetic process	BP	AN7818 | AN7805 | AN7804	0.00479193	0.0434093	3 / 4	3 / 1749
GO:0030248	cellulose binding	MF	AN5282 | AN1602 | AN9276	0.00479193	0.0434093	3 / 4	3 / 1749
GO:0004557	alpha-galactosidase activity	MF	AN8138 | AN7152 | AN9035	0.00479193	0.0434093	3 / 4	3 / 1749
GO:1900560	austinol biosynthetic process	BP	AN7818 | AN7805 | AN7804	0.00479193	0.0434093	3 / 4	3 / 1749
GO:0005997	xylulose metabolic process	BP	AN7806 | AN9064 | AN0423	0.00479193	0.0434093	3 / 4	3 / 1749
KEGG pathway ID	KEGG pathway name	KEGG main category	Gene ID(s)	Exact p-value	Adjusted p-value	# genes / category	# genes / input
1100	Metabolic pathways	Metabolism	AN0024.2 | AN0034.2 | AN0423.2 | AN0554.2 | AN0567.2 | AN0593.2 | AN0613.2 | AN0654.2 | AN0664.2 | AN0667.2 | AN0712.2 | AN0875.2 | AN0942.2 | AN1140.2 | AN1726.2 | AN1823.2 | AN1891.2 | AN1895.2 | AN1897.2 | AN1899.2 | AN1969.2 | AN2133.2 | AN2248.2 | AN2334.2 | AN2335.2 | AN2359.2 | AN2407.2 | AN2509.2 | AN2653.2 | AN2723.2 | AN2828.2 | AN2859.2 | AN2860.2 | AN3184.2 | AN3201.2 | AN3291.2 | AN3…	1.714839e-9	1.183239e-7	90 / 680	90 / 1749
360	Phenylalanine metabolism	Metabolism	AN1140.2 | AN1899.2 | AN2662.2 | AN2879.2 | AN3291.2 | AN5690.2 | AN7388.2 | AN7641.2 | AN8303.2 | AN8454.2 | AN8777.2 | AN9034.2	1.54151e-7	3.54547e-06	12 / 25	12 / 1749
280	Valine, leucine and isoleucine degradation	Metabolism	AN0554.2 | AN0593.2 | AN1726.2 | AN2248.2 | AN2335.2 | AN3591.2 | AN4688.2 | AN4690.2 | AN5273.2 | AN5669.2 | AN8559.2 | AN9394.2	1.54151e-7	3.54547e-06	12 / 25	12 / 1749
350	Tyrosine metabolism	Metabolism	AN0024.2 | AN1140.2 | AN1895.2 | AN1897.2 | AN1899.2 | AN3291.2 | AN5690.2 | AN7315.2 | AN7641.2 | AN8454.2 | AN9034.2 | AN9204.2 | AN9425.2	1.17526e-06	2.02732e-05	13 / 34	13 / 1749
254	Aflatoxin biosynthesis	Metabolism	AN7812.2 | AN7816.2 | AN7817.2 | AN7818.2 | AN7821.2 | AN7825.2	7.68666e-06	0.000106076	6 / 8	6 / 1749
40	Pentose and glucuronate interconversions	Metabolism	AN0423.2 | AN0554.2 | AN0942.2 | AN2859.2 | AN2860.2 | AN4336.2 | AN4829.2 | AN6035.2 | AN8891.2 | AN9064.2	1.37994e-05	0.000158693	10 / 25	10 / 1749
410	beta-Alanine metabolism	Metabolism	AN0554.2 | AN1823.2 | AN2248.2 | AN3591.2 | AN5690.2 | AN6658.2 | AN7641.2 | AN8454.2 | AN9034.2	1.97053e-05	0.000194238	9 / 21	9 / 1749
330	Arginine and proline metabolism	Metabolism	AN0554.2 | AN2662.2 | AN2879.2 | AN3291.2 | AN3846.2 | AN4355.2 | AN6658.2 | AN6869.2 | AN7451.2 | AN7669.2 | AN8303.2 | AN8777.2	9.33799e-05	0.000805401	12 / 42	12 / 1749
1220	Degradation of aromatic compounds	Metabolism	AN0024.2 | AN2653.2 | AN2860.2 | AN5310.2 | AN7684.2 | AN8131.2 | AN8349.2 | AN9161.2	0.000234857	0.00180057	8 / 22	8 / 1749
460	Cyanoamino acid metabolism	Metabolism	AN0712.2 | AN1891.2 | AN2828.2 | AN4577.2 | AN5658.2 | AN5976.2	0.000329952	0.00227667	6 / 13	6 / 1749
380	Tryptophan metabolism	Metabolism	AN0554.2 | AN2509.2 | AN2662.2 | AN2706.2 | AN2879.2 | AN3291.2 | AN7388.2 | AN8303.2 | AN8777.2	0.000373803	0.00234476	9 / 29	9 / 1749
650	Butanoate metabolism	Metabolism	AN2248.2 | AN5273.2 | AN5669.2 | AN5852.2 | AN5887.2 | AN7315.2 | AN9394.2	0.000540163	0.00286702	7 / 19	7 / 1749
561	Glycerolipid metabolism	Metabolism	AN0034.2 | AN0554.2 | AN2860.2 | AN3916.2 | AN5986.2 | AN6943.2 | AN9106.2	0.000540163	0.00286702	7 / 19	7 / 1749
511	Other glycan degradation	Metabolism	AN1742.2 | AN3201.2 | AN3368.2 | AN6388.2	0.000626352	0.00308702	4 / 6	4 / 1749
51	Fructose and mannose metabolism	Metabolism	AN0667.2 | AN0942.2 | AN2334.2 | AN4336.2 | AN5672.2 | AN5887.2 | AN7929.2	0.00335183	0.0154184	7 / 25	7 / 1749
72	Synthesis and degradation of ketone bodies	Metabolism	AN5273.2 | AN5669.2 | AN9394.2	0.00511522	0.0220594	3 / 5	3 / 1749
1110	Biosynthesis of secondary metabolites	Metabolism	AN0024.2 | AN0554.2 | AN0654.2 | AN0667.2 | AN0712.2 | AN1726.2 | AN1891.2 | AN2334.2 | AN2407.2 | AN2723.2 | AN2828.2 | AN2860.2 | AN3184.2 | AN3291.2 | AN3846.2 | AN3862.2 | AN4058.2 | AN4348.2 | AN4355.2 | AN4871.2 | AN5138.2 | AN5273.2 | AN5454.2 | AN5690.2 | AN5852.2 | AN5976.2 | AN5984.2 | AN6775.2 | AN6943.2 | AN7641.2 | AN8143.2 | AN8396.2 | AN8454.2 | AN8559.2 | AN9178.2	0.00648303	0.0263135	35 / 281	35 / 1749
562	Inositol phosphate metabolism	Metabolism	AN0664.2 | AN3591.2 | AN3636.2 | AN5984.2 | AN7691.2	0.00794957	0.0304734	5 / 16	5 / 1749
downregulated genes
FunCat ID	FunCat description	FunCat main category	Gene ID(s)	Exact p-value	Adjusted p-value	# genes / category	# genes / input
02.13.03	aerobic respiration	Energy	ANIA_00252 | ANIA_00357 | ANIA_00747 | ANIA_01523 | ANIA_01624 | ANIA_01722 | ANIA_01743 | ANIA_01915 | ANIA_02099 | ANIA_02306 | ANIA_02315 | ANIA_02316 | ANIA_03034 | ANIA_03738 | ANIA_04064 | ANIA_04388 | ANIA_04402 | ANIA_04525 | ANIA_05083 | ANIA_05497 | ANIA_06255 | ANIA_06297 | ANIA_06386 | ANIA_06593 | ANIA_07500 | ANIA_07752 | ANIA_08118 | ANIA_08273 | ANIA_10163 | ANIA_10229 | ANIA_1058…	1.693525e-9	7.282159e-7	32 / 93	32 / 1270
20.01.15	electron transport	Cellular transport, transport facilitation and transport routes	ANIA_00170 | ANIA_00252 | ANIA_00357 | ANIA_00747 | ANIA_00943 | ANIA_01006 | ANIA_01396 | ANIA_01510 | ANIA_01523 | ANIA_01624 | ANIA_01748 | ANIA_01825 | ANIA_02042 | ANIA_02306 | ANIA_02315 | ANIA_02316 | ANIA_02590 | ANIA_02596 | ANIA_02682 | ANIA_02704 | ANIA_02727 | ANIA_03275 | ANIA_03281 | ANIA_03394 | ANIA_03586 | ANIA_04006 | ANIA_04081 | ANIA_04110 | ANIA_04117 | ANIA_04126 | ANIA_0438…	6.899034e-8	1.48329e-05	69 / 329	69 / 1270
2.11	electron transport and membrane-associated energy conservation	Energy	ANIA_00252 | ANIA_00357 | ANIA_00747 | ANIA_00943 | ANIA_01523 | ANIA_01624 | ANIA_02306 | ANIA_02315 | ANIA_02316 | ANIA_02590 | ANIA_02682 | ANIA_04126 | ANIA_04388 | ANIA_04424 | ANIA_04525 | ANIA_05228 | ANIA_06167 | ANIA_06255 | ANIA_06366 | ANIA_06386 | ANIA_06753 | ANIA_07500 | ANIA_08118 | ANIA_08273 | ANIA_10163 | ANIA_10229 | ANIA_10296 | ANIA_10585 | ANIA_10626 | ANIA_10834 | ANIA_1134…	4.020285e-7	5.76241e-05	32 / 114	32 / 1270
2.13	respiration	Energy	ANIA_00252 | ANIA_00357 | ANIA_00726 | ANIA_00943 | ANIA_01396 | ANIA_01523 | ANIA_01624 | ANIA_01915 | ANIA_02099 | ANIA_02306 | ANIA_02315 | ANIA_02590 | ANIA_03922 | ANIA_04126 | ANIA_04424 | ANIA_04525 | ANIA_04863 | ANIA_04888 | ANIA_06366 | ANIA_06386 | ANIA_07500 | ANIA_08118 | ANIA_10296 | ANIA_10553 | ANIA_10626 | ANIA_11002 | ANIA_11347	1.25809e-06	0.000135244	27 / 92	27 / 1270
16.21.05	FAD/FMN binding	Protein with binding function or cofactor requirement (structural or analytic)	ANIA_01006 | ANIA_01007 | ANIA_01310 | ANIA_01396 | ANIA_01787 | ANIA_02042 | ANIA_02574 | ANIA_02682 | ANIA_02704 | ANIA_03586 | ANIA_03920 | ANIA_04006 | ANIA_04110 | ANIA_04120 | ANIA_05200 | ANIA_05228 | ANIA_05258 | ANIA_05338 | ANIA_05838 | ANIA_05846 | ANIA_06366 | ANIA_06386 | ANIA_07274 | ANIA_07832 | ANIA_08206 | ANIA_08547 | ANIA_08801 | ANIA_09348 | ANIA_10229 | ANIA_10290 | ANIA_1029…	1.74249e-05	0.00128542	33 / 140	33 / 1270
1.2	secondary metabolism	Metabolism	ANIA_00010 | ANIA_00011 | ANIA_00016 | ANIA_00054 | ANIA_00274 | ANIA_00364 | ANIA_00473 | ANIA_00498 | ANIA_00744 | ANIA_00856 | ANIA_01034 | ANIA_01061 | ANIA_01077 | ANIA_01310 | ANIA_01312 | ANIA_01596 | ANIA_01597 | ANIA_01786 | ANIA_01787 | ANIA_01901 | ANIA_02021 | ANIA_02032 | ANIA_02033 | ANIA_02036 | ANIA_02287 | ANIA_02475 | ANIA_02559 | ANIA_02574 | ANIA_02575 | ANIA_02596 | ANIA_0259…	1.79361e-05	0.00128542	159 / 1068	159 / 1270
01.07.01	biosynthesis of vitamins, cofactors, and prosthetic groups	Metabolism	ANIA_00856 | ANIA_00991 | ANIA_01102 | ANIA_01722 | ANIA_01743 | ANIA_01767 | ANIA_01778 | ANIA_01915 | ANIA_01999 | ANIA_02435 | ANIA_02436 | ANIA_02493 | ANIA_02733 | ANIA_03031 | ANIA_03586 | ANIA_03920 | ANIA_04126 | ANIA_04757 | ANIA_04888 | ANIA_05130 | ANIA_05200 | ANIA_05435 | ANIA_05497 | ANIA_05586 | ANIA_06297 | ANIA_06644 | ANIA_06645 | ANIA_07656 | ANIA_07725 | ANIA_07752 | ANIA_0819…	2.61747e-05	0.00160787	35 / 155	35 / 1270
20.01.11	amine / polyamine transport	Cellular transport, transport facilitation and transport routes	ANIA_00332 | ANIA_00856 | ANIA_01061 | ANIA_02287 | ANIA_02598 | ANIA_03347 | ANIA_03352 | ANIA_04119 | ANIA_04313 | ANIA_04478 | ANIA_05540 | ANIA_06019 | ANIA_07373 | ANIA_07392 | ANIA_08122 | ANIA_08198 | ANIA_08966 | ANIA_08990 | ANIA_10905	3.98031e-05	0.00213942	19 / 64	19 / 1270
32.05.05	virulence, disease factors	Cell rescue, defense and virulence	ANIA_00011 | ANIA_00550 | ANIA_00857 | ANIA_01312 | ANIA_01607 | ANIA_02035 | ANIA_02108 | ANIA_02575 | ANIA_02587 | ANIA_02649 | ANIA_02683 | ANIA_02726 | ANIA_03282 | ANIA_03321 | ANIA_04642 | ANIA_04852 | ANIA_05069 | ANIA_06924 | ANIA_06946 | ANIA_07232 | ANIA_07400 | ANIA_07523 | ANIA_08480 | ANIA_08548 | ANIA_08910 | ANIA_08943 | ANIA_08984 | ANIA_10518	0.000123483	0.00589972	28 / 122	28 / 1270
1.02	nitrogen, sulfur and selenium metabolism	Metabolism	ANIA_00215 | ANIA_00232 | ANIA_00366 | ANIA_00565 | ANIA_01006 | ANIA_01007 | ANIA_01150 | ANIA_01825 | ANIA_01923 | ANIA_01993 | ANIA_02197 | ANIA_02287 | ANIA_03027 | ANIA_03239 | ANIA_03275 | ANIA_03281 | ANIA_04110 | ANIA_04111 | ANIA_04120 | ANIA_05411 | ANIA_07169 | ANIA_07634 | ANIA_07656 | ANIA_07881 | ANIA_08206 | ANIA_08277 | ANIA_08346 | ANIA_08451 | ANIA_08801 | ANIA_08905 | ANIA_0898…	0.00013764	0.00591854	38 / 187	38 / 1270
1.05	C-compound and carbohydrate metabolism	Metabolism	ANIA_00009 | ANIA_00054 | ANIA_00517 | ANIA_00549 | ANIA_00887 | ANIA_00941 | ANIA_01246 | ANIA_01310 | ANIA_01312 | ANIA_01396 | ANIA_01472 | ANIA_01547 | ANIA_01551 | ANIA_01571 | ANIA_01620 | ANIA_01743 | ANIA_01786 | ANIA_01787 | ANIA_01831 | ANIA_01918 | ANIA_02010 | ANIA_02037 | ANIA_02177 | ANIA_02286 | ANIA_02385 | ANIA_02435 | ANIA_02436 | ANIA_02470 | ANIA_02493 | ANIA_02574 | ANIA_0259…	0.000264728	0.0097208	134 / 919	134 / 1270
01.20.19.01	metabolism of porphyrins	Metabolism	ANIA_01722 | ANIA_01915 | ANIA_02733 | ANIA_03920 | ANIA_05130 | ANIA_05132 | ANIA_06645 | ANIA_06659 | ANIA_07752 | ANIA_10913	0.000271278	0.0097208	10 / 26	10 / 1270
01.06.06.11	tetracyclic and pentacyclic triterpenes (cholesterin, steroids and hopanoids) metabolism	Metabolism	ANIA_00451 | ANIA_00640 | ANIA_01006 | ANIA_01593 | ANIA_01901 | ANIA_02119 | ANIA_03305 | ANIA_03638 | ANIA_04094 | ANIA_04117 | ANIA_04923 | ANIA_05585 | ANIA_05838 | ANIA_06386 | ANIA_06506 | ANIA_06973 | ANIA_07146 | ANIA_07211 | ANIA_08012 | ANIA_08896 | ANIA_08907 | ANIA_09496 | ANIA_11008 | ANIA_11028	0.000810298	0.0268022	24 / 110	24 / 1270
16.21.01	heme binding	Protein with binding function or cofactor requirement (structural or analytic)	ANIA_00357 | ANIA_00918 | ANIA_01006 | ANIA_01748 | ANIA_01901 | ANIA_02596 | ANIA_03394 | ANIA_04117 | ANIA_04592 | ANIA_06255 | ANIA_08118 | ANIA_08411 | ANIA_08637 | ANIA_09108 | ANIA_09339 | ANIA_11142	0.000912881	0.0270751	16 / 62	16 / 1270
01.20.37.03	metabolism of peptide antibiotics	Metabolism	ANIA_00016 | ANIA_02621 | ANIA_03396 | ANIA_07884 | ANIA_08504 | ANIA_09226	0.000944482	0.0270751	6 / 12	6 / 1270
02.45.15	energy generation (e.g. ATP synthase)	Energy	ANIA_00252 | ANIA_00357 | ANIA_00943 | ANIA_01523 | ANIA_01624 | ANIA_02315 | ANIA_10626 | ANIA_11303	0.00172238	0.046289	8 / 22	8 / 1270
GO ID	GO name	GO namespace	Gene ID(s)	Exact p-value	Adjusted p-value	# genes / category	# genes / input
GO:0006096	glycolytic process	BP	AN1918 | AN5746 | AN8041 | AN0887 | AN1246 | AN5210	5.0078e-05	0.0189796	6 / 9	6 / 1270
GO:0006094	gluconeogenesis	BP	AN1918 | AN5746 | AN8041 | AN0887 | AN1246 | AN5210	0.000234062	0.0357917	6 / 11	6 / 1270
GO:0005739	mitochondrion	CC	AN3894 | AN10466 | AN2099 | AN10778 | AN6010 | AN1624 | AN5200 | AN6366 | AN8275 | AN4757 | AN1722 | AN6246 | AN6089 | AN2055 | AN7722 | AN3831 | AN6306	0.000283311	0.0357917	17 / 73	17 / 1270
KEGG pathway ID	KEGG pathway name	KEGG main category	Gene ID(s)	Exact p-value	Adjusted p-value	# genes / category	# genes / input
1100	Metabolic pathways	Metabolism	AN0252.2 | AN0357.2 | AN0451.2 | AN0565.2 | AN0640.2 | AN0913.2 | AN0929.2 | AN0941.2 | AN0943.2 | AN1102.2 | AN1150.2 | AN1246.2 | AN1252.2 | AN1523.2 | AN1624.2 | AN1722.2 | AN1743.2 | AN1778.2 | AN1901.2 | AN1915.2 | AN1918.2 | AN1923.2 | AN1993.2 | AN2286.2 | AN2306.2 | AN2315.2 | AN2316.2 | AN2336.2 | AN2435.2 | AN2436.2 | AN2526.2 | AN2621.2 | AN2638.2 | AN2733.2 | AN3031.2 | AN3104.2 | AN3…	1.040615e-12	8.533047e-11	117 / 680	117 / 1270
190	Oxidative phosphorylation	Metabolism	AN0252.2 | AN0357.2 | AN0943.2 | AN1523.2 | AN1624.2 | AN1722.2 | AN1915.2 | AN2306.2 | AN2315.2 | AN2316.2 | AN3922.2 | AN4388.2 | AN4525.2 | AN4863.2 | AN4927.2 | AN5597.2 | AN6255.2 | AN7500.2 | AN8118.2 | AN8273.2 | ANID_20001 | ANID_20002 | ANID_20005 | ANID_20008 | ANID_20010 | ANID_20011 | ANID_20012	7.096658e-11	2.90963e-9	27 / 66	27 / 1270
1110	Biosynthesis of secondary metabolites	Metabolism	AN1150.2 | AN1246.2 | AN1722.2 | AN1743.2 | AN1778.2 | AN1901.2 | AN1915.2 | AN1918.2 | AN1993.2 | AN2286.2 | AN2435.2 | AN2436.2 | AN2526.2 | AN2621.2 | AN2638.2 | AN2733.2 | AN3223.2 | AN3277.2 | AN3586.2 | AN3920.2 | AN4094.2 | AN4569.2 | AN4727.2 | AN4888.2 | AN4923.2 | AN5130.2 | AN5159.2 | AN5210.2 | AN5447.2 | AN5586.2 | AN5731.2 | AN5746.2 | AN5907.2 | AN6346.2 | AN6366.2 | AN6386.2 | AN6…	5.06343e-06	0.000110292	53 / 281	53 / 1270
100	Steroid biosynthesis	Metabolism	AN0451.2 | AN1901.2 | AN4094.2 | AN5585.2 | AN6506.2 | AN7146.2 | AN7211.2 | AN8907.2	5.38011e-06	0.000110292	8 / 12	8 / 1270
430	Taurine and hypotaurine metabolism	Metabolism	AN4081.2 | AN4914.2 | AN5447.2 | AN7278.2	0.00165883	0.0272048	4 / 6	4 / 1270
860	Porphyrin and chlorophyll metabolism	Metabolism	AN1722.2 | AN1915.2 | AN2733.2 | AN3920.2 | AN5130.2 | AN7752.2	0.00317189	0.0433492	6 / 15	6 / 1270
620	Pyruvate metabolism	Metabolism	AN1547.2 | AN1918.2 | AN4424.2 | AN4914.2 | AN5210.2 | AN5843.2 | AN6168.2 | AN6717.2 | AN6933.2	0.00398446	0.0466751	9 / 31	9 / 1270

## Sheet: Sheet 2
Arabinogalactan containing cultures vs. Glucose containing cultures
upregulated genes
FunCat ID	FunCat description	FunCat main category	Gene ID(s)	Exact p-value	Adjusted p-value	# genes / category	# genes / input
1.2	secondary metabolism	Metabolism	ANIA_00013 | ANIA_00015 | ANIA_00018 | ANIA_00025 | ANIA_00027 | ANIA_00036 | ANIA_00051 | ANIA_00147 | ANIA_00149 | ANIA_00150 | ANIA_00195 | ANIA_00208 | ANIA_00216 | ANIA_00231 | ANIA_00233 | ANIA_00338 | ANIA_00364 | ANIA_00370 | ANIA_00382 | ANIA_00423 | ANIA_00459 | ANIA_00489 | ANIA_00501 | ANIA_00529 | ANIA_00533 | ANIA_00567 | ANIA_00586 | ANIA_00606 | ANIA_00610 | ANIA_00613 | ANIA_0061…	1.425751e-52	6.202015e-50	400 / 1068	400 / 2143
1.05	C-compound and carbohydrate metabolism	Metabolism	ANIA_00023 | ANIA_00024 | ANIA_00034 | ANIA_00036 | ANIA_00050 | ANIA_00100 | ANIA_00146 | ANIA_00180 | ANIA_00194 | ANIA_00216 | ANIA_00221 | ANIA_00245 | ANIA_00322 | ANIA_00370 | ANIA_00398 | ANIA_00423 | ANIA_00472 | ANIA_00501 | ANIA_00541 | ANIA_00554 | ANIA_00567 | ANIA_00574 | ANIA_00593 | ANIA_00618 | ANIA_00649 | ANIA_00675 | ANIA_00690 | ANIA_00712 | ANIA_00740 | ANIA_00741 | ANIA_0074…	7.695785e-31	1.673833e-28	315 / 919	315 / 2143
20.09.18.07	non-vesicular cellular import	Cellular transport, transport facilitation and transport routes	ANIA_00013 | ANIA_00218 | ANIA_00233 | ANIA_00250 | ANIA_00382 | ANIA_00497 | ANIA_00501 | ANIA_00614 | ANIA_00811 | ANIA_01109 | ANIA_01138 | ANIA_01185 | ANIA_01276 | ANIA_01577 | ANIA_01581 | ANIA_01659 | ANIA_01681 | ANIA_01865 | ANIA_02074 | ANIA_02282 | ANIA_02344 | ANIA_02358 | ANIA_02372 | ANIA_02544 | ANIA_02729 | ANIA_02781 | ANIA_02814 | ANIA_02840 | ANIA_02869 | ANIA_03066 | ANIA_0319…	8.392606e-20	1.216928e-17	110 / 248	110 / 2143
1.06	lipid, fatty acid and isoprenoid metabolism	Metabolism	ANIA_00025 | ANIA_00027 | ANIA_00034 | ANIA_00147 | ANIA_00180 | ANIA_00216 | ANIA_00257 | ANIA_00322 | ANIA_00370 | ANIA_00554 | ANIA_00558 | ANIA_00563 | ANIA_00609 | ANIA_00618 | ANIA_00666 | ANIA_00746 | ANIA_00783 | ANIA_00824 | ANIA_00868 | ANIA_01014 | ANIA_01050 | ANIA_01078 | ANIA_01136 | ANIA_01314 | ANIA_01428 | ANIA_01433 | ANIA_01482 | ANIA_01502 | ANIA_01580 | ANIA_01699 | ANIA_0171…	5.910225e-15	6.42737e-13	199 / 624	199 / 2143
20.01.03	C-compound and carbohydrate transport	Cellular transport, transport facilitation and transport routes	ANIA_00013 | ANIA_00208 | ANIA_00233 | ANIA_00250 | ANIA_00382 | ANIA_00501 | ANIA_01109 | ANIA_01138 | ANIA_01276 | ANIA_01308 | ANIA_01577 | ANIA_01702 | ANIA_01738 | ANIA_01830 | ANIA_01839 | ANIA_01865 | ANIA_01917 | ANIA_02358 | ANIA_02372 | ANIA_02465 | ANIA_02544 | ANIA_02591 | ANIA_02601 | ANIA_02663 | ANIA_02814 | ANIA_02840 | ANIA_02869 | ANIA_02958 | ANIA_03066 | ANIA_03199 | ANIA_0320…	4.363705e-13	3.796424e-11	104 / 275	104 / 2143
01.05.03	polysaccharide metabolism	Metabolism	ANIA_00221 | ANIA_00423 | ANIA_00472 | ANIA_00541 | ANIA_00558 | ANIA_00712 | ANIA_00741 | ANIA_00787 | ANIA_00941 | ANIA_01043 | ANIA_01046 | ANIA_01273 | ANIA_01277 | ANIA_01477 | ANIA_01502 | ANIA_01602 | ANIA_01604 | ANIA_01742 | ANIA_01772 | ANIA_01818 | ANIA_01870 | ANIA_02227 | ANIA_02359 | ANIA_02395 | ANIA_02463 | ANIA_02828 | ANIA_03046 | ANIA_03201 | ANIA_03337 | ANIA_03368 | ANIA_0338…	7.892549e-13	5.722098e-11	92 / 234	92 / 2143
01.05.02.07	sugar, glucoside, polyol and carboxylate catabolism	Metabolism	ANIA_00423 | ANIA_00472 | ANIA_00613 | ANIA_00675 | ANIA_00712 | ANIA_00741 | ANIA_00942 | ANIA_01043 | ANIA_01273 | ANIA_01277 | ANIA_01477 | ANIA_01602 | ANIA_01642 | ANIA_01679 | ANIA_01870 | ANIA_01885 | ANIA_02180 | ANIA_02217 | ANIA_02227 | ANIA_02378 | ANIA_02395 | ANIA_02463 | ANIA_02528 | ANIA_02533 | ANIA_02534 | ANIA_02709 | ANIA_02828 | ANIA_02834 | ANIA_03046 | ANIA_03201 | ANIA_0329…	2.952429e-12	1.834724e-10	91 / 235	91 / 2143
2.25	oxidation of fatty acids	Energy	ANIA_00180 | ANIA_00257 | ANIA_00370 | ANIA_00824 | ANIA_00868 | ANIA_01050 | ANIA_01078 | ANIA_01699 | ANIA_01840 | ANIA_02529 | ANIA_02577 | ANIA_02716 | ANIA_03880 | ANIA_04009 | ANIA_04353 | ANIA_04688 | ANIA_05192 | ANIA_05287 | ANIA_05484 | ANIA_05646 | ANIA_05698 | ANIA_05828 | ANIA_05852 | ANIA_05916 | ANIA_06394 | ANIA_06649 | ANIA_06765 | ANIA_07008 | ANIA_07111 | ANIA_07320 | ANIA_0828…	6.494847e-12	3.531573e-10	37 / 63	37 / 2143
20.03	transport facilities	Cellular transport, transport facilitation and transport routes	ANIA_00013 | ANIA_00218 | ANIA_00233 | ANIA_00382 | ANIA_00497 | ANIA_00501 | ANIA_00614 | ANIA_00811 | ANIA_01185 | ANIA_01276 | ANIA_01308 | ANIA_01659 | ANIA_01681 | ANIA_01702 | ANIA_01738 | ANIA_01830 | ANIA_01839 | ANIA_01865 | ANIA_01917 | ANIA_01920 | ANIA_02074 | ANIA_02282 | ANIA_02344 | ANIA_02358 | ANIA_02372 | ANIA_02465 | ANIA_02544 | ANIA_02591 | ANIA_02601 | ANIA_02663 | ANIA_0272…	6.564563e-11	3.172872e-9	146 / 460	146 / 2143
01.01.09.04.02	degradation of phenylalanine	Metabolism	ANIA_00398 | ANIA_00459 | ANIA_00477 | ANIA_00649 | ANIA_00801 | ANIA_01895 | ANIA_01896 | ANIA_01897 | ANIA_01899 | ANIA_02549 | ANIA_02610 | ANIA_02674 | ANIA_02777 | ANIA_04643 | ANIA_05433 | ANIA_05837 | ANIA_05990 | ANIA_06101 | ANIA_06414 | ANIA_06449 | ANIA_07631 | ANIA_07772 | ANIA_07773 | ANIA_07824 | ANIA_08108 | ANIA_08338 | ANIA_09007 | ANIA_10074 | ANIA_10259 | ANIA_10612 | ANIA_1065…	8.054288e-11	3.503615e-9	33 / 56	33 / 2143
20.09.18	cellular import	Cellular transport, transport facilitation and transport routes	ANIA_00013 | ANIA_00135 | ANIA_00233 | ANIA_00250 | ANIA_00497 | ANIA_00614 | ANIA_00811 | ANIA_01109 | ANIA_01138 | ANIA_01185 | ANIA_01577 | ANIA_01581 | ANIA_01659 | ANIA_01681 | ANIA_01702 | ANIA_01830 | ANIA_01865 | ANIA_02282 | ANIA_02344 | ANIA_02372 | ANIA_02465 | ANIA_02591 | ANIA_02601 | ANIA_02663 | ANIA_02729 | ANIA_02781 | ANIA_02814 | ANIA_02869 | ANIA_02958 | ANIA_03066 | ANIA_0319…	1.525661e-10	6.033295e-9	103 / 295	103 / 2143
20.01.23	allantoin and allantoate transport	Cellular transport, transport facilitation and transport routes	ANIA_00497 | ANIA_00614 | ANIA_00811 | ANIA_01185 | ANIA_01681 | ANIA_02282 | ANIA_02344 | ANIA_02729 | ANIA_03066 | ANIA_03195 | ANIA_03221 | ANIA_04097 | ANIA_04106 | ANIA_04628 | ANIA_04826 | ANIA_05032 | ANIA_06778 | ANIA_07027 | ANIA_07157 | ANIA_07380 | ANIA_07648 | ANIA_08595 | ANIA_08623 | ANIA_08814 | ANIA_08936 | ANIA_08955 | ANIA_08996 | ANIA_09010 | ANIA_09294 | ANIA_09336 | ANIA_0939…	2.770086e-10	1.004156e-8	39 / 75	39 / 2143
01.06.05	fatty acid metabolism	Metabolism	ANIA_00146 | ANIA_00257 | ANIA_00322 | ANIA_00370 | ANIA_00574 | ANIA_00784 | ANIA_00824 | ANIA_00868 | ANIA_01014 | ANIA_01050 | ANIA_01078 | ANIA_01763 | ANIA_01822 | ANIA_01886 | ANIA_02529 | ANIA_02577 | ANIA_02716 | ANIA_02721 | ANIA_03318 | ANIA_03380 | ANIA_03575 | ANIA_03862 | ANIA_03880 | ANIA_03889 | ANIA_04009 | ANIA_04687 | ANIA_04690 | ANIA_05192 | ANIA_05287 | ANIA_05373 | ANIA_0540…	7.791144e-9	2.607037e-7	65 / 170	65 / 2143
20.01.25	vitamine/cofactor transport	Cellular transport, transport facilitation and transport routes	ANIA_00614 | ANIA_01681 | ANIA_02282 | ANIA_02344 | ANIA_02663 | ANIA_02729 | ANIA_03066 | ANIA_03221 | ANIA_03876 | ANIA_04097 | ANIA_04106 | ANIA_04826 | ANIA_05032 | ANIA_05275 | ANIA_06381 | ANIA_06778 | ANIA_07027 | ANIA_07304 | ANIA_07648 | ANIA_07967 | ANIA_08198 | ANIA_08423 | ANIA_08502 | ANIA_08595 | ANIA_08623 | ANIA_08936 | ANIA_08955 | ANIA_08996 | ANIA_09010 | ANIA_09294 | ANIA_0933…	4.076915e-8	1.26676e-06	39 / 86	39 / 2143
01.01.09.04.01	biosynthesis of phenylalanine	Metabolism	ANIA_00398 | ANIA_00459 | ANIA_00649 | ANIA_00801 | ANIA_01899 | ANIA_02549 | ANIA_02610 | ANIA_02674 | ANIA_04643 | ANIA_05433 | ANIA_05837 | ANIA_05990 | ANIA_06101 | ANIA_06414 | ANIA_06449 | ANIA_07631 | ANIA_07772 | ANIA_07773 | ANIA_07824 | ANIA_08338 | ANIA_09007 | ANIA_10074 | ANIA_10259 | ANIA_10599 | ANIA_10657 | ANIA_10950 | ANIA_11034	1.662847e-7	4.82226e-06	27 / 52	27 / 2143
01.06.06.05	sesquiterpenes metabolism	Metabolism	ANIA_00338 | ANIA_00606 | ANIA_01737 | ANIA_02040 | ANIA_06787 | ANIA_07522 | ANIA_07818 | ANIA_07932 | ANIA_08309 | ANIA_09313 | ANIA_10573 | ANIA_10811 | ANIA_11013	4.7955e-06	0.000130378	13 / 19	13 / 2143
02.16.01	alcohol fermentation	Energy	ANIA_00024 | ANIA_00100 | ANIA_00554 | ANIA_00740 | ANIA_01868 | ANIA_02860 | ANIA_03205 | ANIA_03573 | ANIA_03741 | ANIA_04540 | ANIA_05178 | ANIA_05913 | ANIA_06439 | ANIA_08396 | ANIA_08979 | ANIA_09114 | ANIA_09198 | ANIA_10358 | ANIA_10703 | ANIA_10793 | ANIA_11177	8.66789e-06	0.000221796	21 / 42	21 / 2143
32.07	detoxification	Cell rescue, defense and virulence	ANIA_00024 | ANIA_00025 | ANIA_00027 | ANIA_00100 | ANIA_00147 | ANIA_00785 | ANIA_00788 | ANIA_01089 | ANIA_01174 | ANIA_01688 | ANIA_01724 | ANIA_01877 | ANIA_02593 | ANIA_02625 | ANIA_02629 | ANIA_02669 | ANIA_03227 | ANIA_03383 | ANIA_03398 | ANIA_03741 | ANIA_03849 | ANIA_04019 | ANIA_04151 | ANIA_04576 | ANIA_05310 | ANIA_05400 | ANIA_05421 | ANIA_05440 | ANIA_05514 | ANIA_05763 | ANIA_0583…	3.46662e-05	0.000837766	66 / 213	66 / 2143
20.03.02.02.01	proton driven symporter	Cellular transport, transport facilitation and transport routes	ANIA_02465 | ANIA_02601 | ANIA_02869 | ANIA_03204 | ANIA_03210 | ANIA_03515 | ANIA_04316 | ANIA_04621 | ANIA_05304 | ANIA_05917 | ANIA_05968 | ANIA_06804 | ANIA_07067 | ANIA_07119 | ANIA_07344 | ANIA_10812 | ANIA_10845	3.83917e-05	0.000878969	17 / 33	17 / 2143
32.07.01	detoxification involving cytochrome P450	Cell rescue, defense and virulence	ANIA_00338 | ANIA_00459 | ANIA_01397 | ANIA_01884 | ANIA_02040 | ANIA_02607 | ANIA_03256 | ANIA_03570 | ANIA_04643 | ANIA_05433 | ANIA_05665 | ANIA_05837 | ANIA_05838 | ANIA_06414 | ANIA_06449 | ANIA_06787 | ANIA_07772 | ANIA_07773 | ANIA_07808 | ANIA_07824 | ANIA_07932 | ANIA_08250 | ANIA_08309 | ANIA_08338 | ANIA_08437 | ANIA_08438 | ANIA_08579 | ANIA_09313 | ANIA_10259 | ANIA_10479 | ANIA_1057…	6.19514e-05	0.00130759	33 / 88	33 / 2143
16.05	polysaccharide binding	Protein with binding function or cofactor requirement (structural or analytic)	ANIA_00221 | ANIA_00541 | ANIA_01604 | ANIA_01818 | ANIA_03790 | ANIA_04871 | ANIA_05061 | ANIA_05454 | ANIA_06389 | ANIA_07349 | ANIA_07401 | ANIA_07613 | ANIA_09042 | ANIA_09380 | ANIA_09390 | ANIA_11064	6.31249e-05	0.00130759	16 / 31	16 / 2143
01.05.11.07.01	aerobic aromate catabolism	Metabolism	ANIA_00025 | ANIA_00027 | ANIA_00901 | ANIA_01541 | ANIA_01877 | ANIA_02075 | ANIA_02777 | ANIA_03248 | ANIA_04151 | ANIA_05044 | ANIA_05400 | ANIA_05838 | ANIA_06683 | ANIA_07228 | ANIA_07389 | ANIA_07418 | ANIA_07804 | ANIA_08370 | ANIA_08381 | ANIA_08521 | ANIA_08757 | ANIA_09029 | ANIA_09164 | ANIA_09282 | ANIA_10612 | ANIA_10952 | ANIA_11187	0.000164259	0.00311752	27 / 70	27 / 2143
01.25.01	extracellular polysaccharide degradation	Metabolism	ANIA_01604 | ANIA_02528 | ANIA_03337 | ANIA_03790 | ANIA_03860 | ANIA_04825 | ANIA_05061 | ANIA_06106 | ANIA_06748 | ANIA_07349 | ANIA_07869 | ANIA_09042 | ANIA_09286 | ANIA_09380 | ANIA_10419 | ANIA_11064	0.000164834	0.00311752	16 / 33	16 / 2143
01.20.17.03	metabolism of amines	Metabolism	ANIA_00567 | ANIA_01586 | ANIA_02566 | ANIA_03206 | ANIA_03291 | ANIA_03531 | ANIA_03960 | ANIA_05690 | ANIA_06445 | ANIA_07230 | ANIA_07267 | ANIA_07408 | ANIA_07641 | ANIA_07812 | ANIA_08454 | ANIA_09011 | ANIA_09178	0.000350474	0.00635235	17 / 38	17 / 2143
1.07	metabolism of vitamins, cofactors, and prosthetic groups	Metabolism	ANIA_00050 | ANIA_00586 | ANIA_00765 | ANIA_00774 | ANIA_00942 | ANIA_01129 | ANIA_01482 | ANIA_01563 | ANIA_01611 | ANIA_01685 | ANIA_01745 | ANIA_01763 | ANIA_01822 | ANIA_01899 | ANIA_02250 | ANIA_02393 | ANIA_02786 | ANIA_02813 | ANIA_03226 | ANIA_03228 | ANIA_03249 | ANIA_04055 | ANIA_05644 | ANIA_05653 | ANIA_05850 | ANIA_06332 | ANIA_06525 | ANIA_06766 | ANIA_07128 | ANIA_07268 | ANIA_0835…	0.000411723	0.00716399	44 / 139	44 / 2143
2.16	fermentation	Energy	ANIA_00024 | ANIA_00423 | ANIA_01541 | ANIA_01616 | ANIA_01642 | ANIA_01679 | ANIA_01868 | ANIA_02158 | ANIA_02860 | ANIA_03205 | ANIA_04829 | ANIA_05178 | ANIA_06525 | ANIA_06808 | ANIA_07068 | ANIA_07805 | ANIA_08356 | ANIA_09288 | ANIA_11030 | ANIA_11177	0.000656091	0.0107083	20 / 50	20 / 2143
32.05.03	defense related proteins	Cell rescue, defense and virulence	ANIA_00554 | ANIA_01309 | ANIA_01433 | ANIA_01519 | ANIA_02545 | ANIA_02621 | ANIA_03037 | ANIA_03256 | ANIA_04643 | ANIA_04893 | ANIA_05665 | ANIA_06383 | ANIA_06389 | ANIA_06449 | ANIA_06470 | ANIA_08105 | ANIA_08139 | ANIA_08250 | ANIA_08437 | ANIA_08969 | ANIA_09129 | ANIA_09248 | ANIA_09253 | ANIA_10124 | ANIA_10862	0.000664652	0.0107083	25 / 68	25 / 2143
2.07	pentose-phosphate pathway	Energy	ANIA_00023 | ANIA_00593 | ANIA_01822 | ANIA_01886 | ANIA_01888 | ANIA_02334 | ANIA_02335 | ANIA_02721 | ANIA_05373 | ANIA_06113 | ANIA_08163 | ANIA_08551 | ANIA_08792 | ANIA_08935 | ANIA_09127 | ANIA_09443 | ANIA_10005 | ANIA_10233 | ANIA_10335 | ANIA_10668 | ANIA_10783	0.000754408	0.0117203	21 / 54	21 / 2143
01.20.01.09	metabolism of aminoglycoside antibiotics	Metabolism	ANIA_00675 | ANIA_04605 | ANIA_05007 | ANIA_08496 | ANIA_10226	0.00142682	0.0214023	5 / 6	5 / 2143
01.20.35.01	metabolism of phenylpropanoids	Metabolism	ANIA_00231 | ANIA_00398 | ANIA_00649 | ANIA_00801 | ANIA_01397 | ANIA_02549 | ANIA_02674 | ANIA_05838 | ANIA_05990 | ANIA_07631 | ANIA_08435 | ANIA_08513 | ANIA_10035 | ANIA_10074 | ANIA_10657 | ANIA_11034	0.00162968	0.0236303	16 / 39	16 / 2143
32.07.03	detoxification by modification	Cell rescue, defense and virulence	ANIA_00147 | ANIA_00675 | ANIA_00765 | ANIA_00785 | ANIA_01857 | ANIA_02593 | ANIA_03227 | ANIA_04576 | ANIA_04625 | ANIA_05044 | ANIA_05310 | ANIA_05440 | ANIA_06383 | ANIA_07292 | ANIA_07684 | ANIA_08470 | ANIA_08782 | ANIA_09029 | ANIA_09161	0.00183243	0.0257131	19 / 50	19 / 2143
01.20.05.11	metabolism of polyketides	Metabolism	ANIA_00150 | ANIA_01036 | ANIA_02547 | ANIA_03386 | ANIA_03887 | ANIA_04827 | ANIA_06000 | ANIA_06444 | ANIA_06962 | ANIA_07815 | ANIA_07825 | ANIA_07909 | ANIA_08383 | ANIA_08513 | ANIA_09005 | ANIA_10297 | ANIA_10430	0.00255312	0.0342956	17 / 44	17 / 2143
01.01.09.01.01	biosynthesis of glycine	Metabolism	ANIA_00567 | ANIA_01899 | ANIA_02786 | ANIA_03206 | ANIA_03531 | ANIA_03960 | ANIA_06445 | ANIA_07230 | ANIA_07267 | ANIA_07408 | ANIA_07564 | ANIA_07812 | ANIA_08446 | ANIA_08657 | ANIA_09011	0.00260173	0.0342956	15 / 37	15 / 2143
01.20.36	non-ribosomal peptide synthesis	Metabolism	ANIA_00150 | ANIA_01680 | ANIA_02064 | ANIA_02545 | ANIA_02924 | ANIA_04827 | ANIA_06444 | ANIA_07815 | ANIA_08105 | ANIA_08433 | ANIA_08513 | ANIA_09129 | ANIA_10297 | ANIA_10576	0.00302161	0.0386589	14 / 34	14 / 2143
20.01.15	electron transport	Cellular transport, transport facilitation and transport routes	ANIA_00318 | ANIA_00338 | ANIA_00554 | ANIA_00567 | ANIA_00606 | ANIA_00824 | ANIA_01397 | ANIA_01733 | ANIA_01737 | ANIA_01763 | ANIA_01822 | ANIA_01858 | ANIA_01882 | ANIA_01884 | ANIA_02040 | ANIA_02566 | ANIA_02607 | ANIA_02778 | ANIA_02786 | ANIA_02835 | ANIA_03206 | ANIA_03256 | ANIA_03291 | ANIA_03531 | ANIA_03575 | ANIA_03591 | ANIA_03855 | ANIA_03862 | ANIA_03880 | ANIA_03960 | ANIA_0479…	0.00383231	0.0476302	84 / 329	84 / 2143
GO ID	GO name	GO namespace	Gene ID(s)	Exact p-value	Adjusted p-value	# genes / category	# genes / input
GO:0005576	extracellular region	CC	AN1571 | AN1277 | AN2534 | AN8007 | AN6525 | AN8149 | AN7345 | AN8138 | AN7152 | AN9035 | AN9286 | AN0554 | AN5558 | AN5309 | AN7180 | AN7962 | AN6093 | AN2632 | AN7908 | AN4102 | AN1804 | AN10482 | AN5976 | AN3903 | AN2227 | AN2828 | AN7396 | AN3949 | AN8401 | AN5176 | AN5282 | AN3418 | AN4871 | AN7331 | AN8006 | AN6438 | AN1285 | AN1602 | AN1772 | AN5267 | AN7388 | AN0756 | AN3297 | AN6427 | AN…	2.87725e-24	1.168164e-21	66 / 127	66 / 2143
GO:0005975	carbohydrate metabolic process	BP	AN1571 | AN1277 | AN2534 | AN8007 | AN8149 | AN7345 | AN8138 | AN7152 | AN9035 | AN9286 | AN6093 | AN2632 | AN7908 | AN4102 | AN0712 | AN1804 | AN10482 | AN5976 | AN3903 | AN2227 | AN2828 | AN7396 | AN3949 | AN8401 | AN5176 | AN5282 | AN3418 | AN4871 | AN1285 | AN1602 | AN1772 | AN5267 | AN0756 | AN3297 | AN6427 | AN7413 | AN9276 | AN1742 | AN3368 | AN0787 | AN2569 | AN8761 | AN9045 | AN8891 | AN…	3.844049e-23	7.803419e-21	57 / 100	57 / 2143
GO:0000272	polysaccharide catabolic process	BP	AN1571 | AN1277 | AN2534 | AN8007 | AN8149 | AN7345 | AN8138 | AN7152 | AN9035 | AN9286 | AN6093 | AN2632 | AN7908 | AN4102 | AN0712 | AN1804 | AN10482 | AN5976 | AN3903 | AN2227 | AN2828 | AN7396 | AN3949 | AN8401 | AN5176 | AN5282 | AN3418 | AN4871 | AN1285 | AN1602 | AN1772 | AN5267 | AN0756 | AN1742 | AN3368 | AN2569 | AN7646 | AN0741 | AN3337 | AN6106 | AN6748 | AN7135 | AN6395 | AN3389 | AN…	9.04358e-21	1.223898e-18	47 / 76	47 / 2143
GO:0016798	hydrolase activity, acting on glycosyl bonds	MF	AN1571 | AN1277 | AN2534 | AN8007 | AN8149 | AN7345 | AN8138 | AN7152 | AN9035 | AN9286 | AN2632 | AN7908 | AN4102 | AN0712 | AN1804 | AN10482 | AN5976 | AN3903 | AN2227 | AN2828 | AN7396 | AN3949 | AN8401 | AN5176 | AN5282 | AN3418 | AN4871 | AN1285 | AN1602 | AN0756 | AN3297 | AN6427 | AN7413 | AN9276 | AN1742 | AN3368 | AN0787 | AN8761 | AN9045 | AN8891 | AN3389 | AN3613 | AN1818 | AN2359	1.073696e-18	1.089801e-16	44 / 73	44 / 2143
GO:0008152	metabolic process	BP	AN1571 | AN1277 | AN2534 | AN8007 | AN6525 | AN2621 | AN8149 | AN7345 | AN8138 | AN7152 | AN9035 | AN9286 | AN0554 | AN10074 | AN11015 | AN1503 | AN5309 | AN7180 | AN2632 | AN7908 | AN4102 | AN0712 | AN1804 | AN10482 | AN5976 | AN3903 | AN2227 | AN2828 | AN7396 | AN3949 | AN1857 | AN8401 | AN5176 | AN5282 | AN3418 | AN4871 | AN1285 | AN1602 | AN1896 | AN3380 | AN0756 | AN3297 | AN6427 | AN7413 | …	1.975586e-15	1.604176e-13	63 / 156	63 / 2143
GO:0005575	cellular_component	CC	AN1277 | AN8007 | AN6525 | AN2621 | AN8149 | AN2901 | AN7345 | AN8138 | AN7152 | AN9035 | AN8979 | AN3741 | AN0554 | AN8777 | AN10074 | AN10233 | AN11015 | AN1412 | AN1503 | AN5342 | AN5440 | AN7962 | AN8861 | AN9274 | AN6093 | AN2632 | AN7908 | AN0712 | AN1804 | AN10482 | AN5976 | AN3903 | AN2828 | AN7396 | AN3949 | AN8401 | AN5176 | AN5282 | AN3418 | AN10380 | AN1285 | AN1602 | AN1772 | AN5267 …	8.31496e-14	4.957248e-12	90 / 300	90 / 2143
GO:0004553	hydrolase activity, hydrolyzing O-glycosyl compounds	MF	AN2534 | AN8007 | AN7345 | AN8138 | AN7152 | AN9035 | AN9286 | AN4102 | AN0712 | AN1804 | AN10482 | AN5976 | AN3903 | AN2227 | AN2828 | AN7396 | AN3949 | AN8401 | AN5176 | AN5282 | AN3418 | AN4871 | AN1285 | AN1602 | AN0756 | AN3297 | AN6427 | AN9276 | AN1742 | AN3368 | AN3613 | AN1818 | AN2359	8.546979e-14	4.957248e-12	33 / 55	33 / 2143
GO:0016787	hydrolase activity	MF	AN1571 | AN1277 | AN2534 | AN8007 | AN8149 | AN2901 | AN7345 | AN8138 | AN7152 | AN9035 | AN9286 | AN5558 | AN8777 | AN5309 | AN7180 | AN7962 | AN8861 | AN5919 | AN6093 | AN2632 | AN7908 | AN4102 | AN0712 | AN1804 | AN10482 | AN5976 | AN3903 | AN2227 | AN2828 | AN7396 | AN3949 | AN1857 | AN8401 | AN5176 | AN5282 | AN3418 | AN4871 | AN2946 | AN10380 | AN6438 | AN1285 | AN1602 | AN1772 | AN5267 | A…	1.843058e-11	9.353518e-10	64 / 187	64 / 2143
GO:0019748	secondary metabolic process	BP	AN2621 | AN10074 | AN2622 | AN7825 | AN7824 | AN7821 | AN7818 | AN7816 | AN7815 | AN7814 | AN7811 | AN7808 | AN7807 | AN7806 | AN7805 | AN7804	6.932912e-10	3.127514e-8	16 / 20	16 / 2143
GO:0045461	sterigmatocystin biosynthetic process	BP	AN7820 | AN0973 | AN6650 | AN7825 | AN7824 | AN7823 | AN7821 | AN7818 | AN7816 | AN7815 | AN7814 | AN11013 | AN7811 | AN7810 | AN7808 | AN7807 | AN7806 | AN7805 | AN7804	4.086277e-9	1.659029e-7	19 / 29	19 / 2143
GO:0045493	xylan catabolic process	BP	AN1571 | AN2534 | AN8007 | AN9286 | AN0388 | AN6093 | AN2632 | AN7908 | AN8401 | AN1772 | AN5267 | AN3613 | AN1818 | AN2359	1.790637e-8	6.609078e-7	14 / 18	14 / 2143
GO:0030245	cellulose catabolic process	BP	AN6093 | AN4102 | AN0712 | AN1804 | AN10482 | AN5976 | AN3903 | AN2227 | AN2828 | AN7396 | AN3949 | AN5176 | AN5282 | AN3418 | AN1285 | AN1602	6.184782e-7	2.09252e-05	16 / 27	16 / 2143
GO:0016491	oxidoreductase activity	MF	AN6525 | AN8979 | AN3741 | AN0554 | AN10233 | AN5440 | AN3380 | AN1897 | AN2622 | AN7388 | AN1733 | AN7824 | AN7823 | AN7821 | AN7818 | AN7815 | AN7814 | AN11013 | AN7811 | AN7810 | AN7808 | AN7806 | AN7805 | AN7804 | AN9064 | AN0423	1.95377e-06	6.10178e-05	26 / 63	26 / 2143
GO:0055114	oxidation-reduction process	BP	AN6525 | AN2621 | AN8979 | AN3741 | AN0554 | AN10233 | AN5440 | AN3380 | AN1897 | AN2622 | AN7388 | AN1733 | AN7824 | AN7823 | AN7821 | AN7818 | AN7815 | AN7814 | AN11013 | AN7811 | AN7810 | AN7808 | AN7806 | AN7805 | AN7804 | AN9064 | AN0423	1.1147e-05	0.000323264	27 / 72	27 / 2143
GO:0008422	beta-glucosidase activity	MF	AN7345 | AN4102 | AN0712 | AN1804 | AN10482 | AN5976 | AN3903 | AN2227 | AN2828 | AN7396 | AN3949	1.31281e-05	0.000355334	11 / 17	11 / 2143
GO:0019566	arabinose metabolic process	BP	AN1571 | AN1277 | AN2534 | AN8007 | AN2632 | AN7908 | AN0423	2.67941e-05	0.000679901	7 / 8	7 / 2143
GO:0045490	pectin catabolic process	BP	AN1571 | AN1277 | AN8007 | AN7908 | AN2569 | AN8761 | AN9045 | AN8891 | AN7646 | AN0741 | AN3337 | AN7135 | AN6395	3.04422e-05	0.00072703	13 / 24	13 / 2143
GO:1900815	monodictyphenone biosynthetic process	BP	AN7820 | AN10074 | AN7825 | AN7810 | AN7807 | AN7806	0.000141936	0.00320144	6 / 7	6 / 2143
GO:0052689	carboxylic ester hydrolase activity	MF	AN5558 | AN5309 | AN7180 | AN6093 | AN1772 | AN5267 | AN7816	0.000294794	0.00629929	7 / 10	7 / 2143
GO:0042732	D-xylose metabolic process	BP	AN8401 | AN9064 | AN3613 | AN1818 | AN2359 | AN0423	0.000487361	0.00989343	6 / 8	6 / 2143
GO:0046355	mannan catabolic process	BP	AN8138 | AN7152 | AN3297 | AN6427 | AN3368	0.000732527	0.0135184	5 / 6	5 / 2143
GO:0046556	alpha-L-arabinofuranosidase activity	MF	AN1571 | AN1277 | AN2632 | AN7908 | AN8401	0.000732527	0.0135184	5 / 6	5 / 2143
GO:0004497	monooxygenase activity	MF	AN7824 | AN7818 | AN11013 | AN7808 | AN7804	0.002209	0.0389937	5 / 7	5 / 2143
GO:0071555	cell wall organization	BP	AN7345 | AN8006 | AN2569 | AN8761 | AN9045 | AN8891 | AN7646 | AN0741 | AN3337 | AN6106 | AN6748 | AN7135 | AN6395 | AN8803 | AN3389	0.00235588	0.0398536	15 / 42	15 / 2143
GO:0009251	glucan catabolic process	BP	AN7345 | AN0712 | AN1804 | AN5282 | AN3418 | AN1285 | AN1602	0.00265391	0.0414418	7 / 13	7 / 2143
GO:0044550	secondary metabolite biosynthetic process	BP	AN3380 | AN7824 | AN7815 | AN7814 | AN7810 | AN7807 | AN7806	0.00265391	0.0414418	7 / 13	7 / 2143
KEGG pathway ID	KEGG pathway name	KEGG main category	Gene ID(s)	Exact p-value	Adjusted p-value	# genes / category	# genes / input
1100	Metabolic pathways	Metabolism	AN0024.2 | AN0034.2 | AN0423.2 | AN0554.2 | AN0567.2 | AN0593.2 | AN0609.2 | AN0613.2 | AN0654.2 | AN0712.2 | AN0787.2 | AN0875.2 | AN0941.2 | AN0942.2 | AN1136.2 | AN1140.2 | AN1285.2 | AN1502.2 | AN1586.2 | AN1673.2 | AN1713.2 | AN1726.2 | AN1733.2 | AN1745.2 | AN1823.2 | AN1857.2 | AN1858.2 | AN1895.2 | AN1896.2 | AN1897.2 | AN1899.2 | AN2133.2 | AN2217.2 | AN2227.2 | AN2248.2 | AN2334.2 | AN2…	7.287489e-13	6.26724e-11	127 / 680	127 / 2143
280	Valine, leucine and isoleucine degradation	Metabolism	AN0554.2 | AN0593.2 | AN1726.2 | AN2248.2 | AN2335.2 | AN3591.2 | AN3639.2 | AN4687.2 | AN4688.2 | AN4690.2 | AN5273.2 | AN5646.2 | AN5669.2 | AN5698.2 | AN5916.2 | AN8559.2 | AN9394.2	4.756926e-11	2.045478e-9	17 / 25	17 / 2143
360	Phenylalanine metabolism	Metabolism	AN1140.2 | AN1586.2 | AN1899.2 | AN2662.2 | AN2879.2 | AN3291.2 | AN3957.2 | AN5690.2 | AN6338.2 | AN7008.2 | AN7388.2 | AN7641.2 | AN8454.2 | AN8777.2	1.028718e-7	2.94899e-06	14 / 25	14 / 2143
350	Tyrosine metabolism	Metabolism	AN0024.2 | AN1140.2 | AN1586.2 | AN1895.2 | AN1896.2 | AN1897.2 | AN1899.2 | AN3291.2 | AN5690.2 | AN6338.2 | AN7315.2 | AN7641.2 | AN8108.2 | AN8454.2 | AN8979.2 | AN9425.2	2.920092e-7	6.2782e-06	16 / 34	16 / 2143
40	Pentose and glucuronate interconversions	Metabolism	AN0423.2 | AN0554.2 | AN0741.2 | AN0942.2 | AN2858.2 | AN2860.2 | AN3889.2 | AN4829.2 | AN5361.2 | AN6035.2 | AN7646.2 | AN8891.2 | AN9064.2	9.598234e-7	1.6509e-05	13 / 25	13 / 2143
460	Cyanoamino acid metabolism	Metabolism	AN0712.2 | AN2217.2 | AN2227.2 | AN2828.2 | AN4577.2 | AN5658.2 | AN5976.2 | AN7367.2 | AN7396.2	1.92547e-06	2.75984e-05	9 / 13	9 / 2143
1220	Degradation of aromatic compounds	Metabolism	AN0024.2 | AN2653.2 | AN2860.2 | AN4576.2 | AN5310.2 | AN7684.2 | AN8131.2 | AN8349.2 | AN8977.2 | AN8979.2 | AN9161.2	1.14502e-05	0.000133973	11 / 22	11 / 2143
1110	Biosynthesis of secondary metabolites	Metabolism	AN0024.2 | AN0554.2 | AN0654.2 | AN0712.2 | AN0824.2 | AN1136.2 | AN1277.2 | AN1428.2 | AN1502.2 | AN1586.2 | AN1673.2 | AN1726.2 | AN2217.2 | AN2227.2 | AN2334.2 | AN2407.2 | AN2621.2 | AN2622.2 | AN2623.2 | AN2723.2 | AN2828.2 | AN2860.2 | AN2901.2 | AN3184.2 | AN3291.2 | AN3639.2 | AN3862.2 | AN4058.2 | AN4255.2 | AN4871.2 | AN4957.2 | AN5138.2 | AN5273.2 | AN5454.2 | AN5646.2 | AN5690.2 | AN5…	1.24627e-05	0.000133973	56 / 281	56 / 2143
500	Starch and sucrose metabolism	Metabolism	AN0712.2 | AN0941.2 | AN1285.2 | AN2217.2 | AN2227.2 | AN2359.2 | AN2828.2 | AN3402.2 | AN4255.2 | AN5361.2 | AN5976.2 | AN7345.2 | AN7396.2 | AN7864.2 | AN8401.2 | AN8891.2	3.50707e-05	0.00033512	16 / 46	16 / 2143
380	Tryptophan metabolism	Metabolism	AN0554.2 | AN1857.2 | AN1858.2 | AN2662.2 | AN2879.2 | AN3291.2 | AN3957.2 | AN5916.2 | AN6338.2 | AN7367.2 | AN7388.2 | AN8777.2	4.92721e-05	0.000395424	12 / 29	12 / 2143
410	beta-Alanine metabolism	Metabolism	AN0554.2 | AN1586.2 | AN1823.2 | AN2248.2 | AN3591.2 | AN5690.2 | AN5916.2 | AN6658.2 | AN7641.2 | AN8454.2	5.05775e-05	0.000395424	10 / 21	10 / 2143
254	Aflatoxin biosynthesis	Metabolism	AN7812.2 | AN7816.2 | AN7817.2 | AN7818.2 | AN7821.2 | AN7825.2	6.12973e-05	0.000439297	6 / 8	6 / 2143
511	Other glycan degradation	Metabolism	AN1502.2 | AN1742.2 | AN3201.2 | AN3368.2 | AN6388.2	0.000125385	0.000745532	5 / 6	5 / 2143
561	Glycerolipid metabolism	Metabolism	AN0034.2 | AN0554.2 | AN1713.2 | AN2860.2 | AN3916.2 | AN5919.2 | AN5986.2 | AN6159.2 | AN6943.2	0.000130035	0.000745532	9 / 19	9 / 2143
650	Butanoate metabolism	Metabolism	AN1482.2 | AN2248.2 | AN5273.2 | AN5669.2 | AN5852.2 | AN5916.2 | AN7008.2 | AN7315.2 | AN9394.2	0.000130035	0.000745532	9 / 19	9 / 2143
71	Fatty acid degradation	Metabolism	AN0024.2 | AN0554.2 | AN0609.2 | AN5646.2 | AN5698.2 | AN5916.2 | AN8280.2 | AN8979.2	0.000541389	0.00290997	8 / 18	8 / 2143
311	Penicillin and cephalosporin biosynthesis	Metabolism	AN2621.2 | AN2622.2 | AN2623.2 | AN6775.2	0.000895211	0.00452871	4 / 5	4 / 2143
53	Ascorbate and aldarate metabolism	Metabolism	AN0554.2 | AN0613.2 | AN8977.2	0.00612009	0.0292405	3 / 4	3 / 2143
330	Arginine and proline metabolism	Metabolism	AN0554.2 | AN1733.2 | AN2662.2 | AN2879.2 | AN2901.2 | AN3291.2 | AN3957.2 | AN6658.2 | AN7451.2 | AN7669.2 | AN8777.2	0.00791278	0.0340249	11 / 42	11 / 2143
520	Amino sugar and nucleotide sugar metabolism	Metabolism	AN1277.2 | AN1428.2 | AN1502.2 | AN2359.2 | AN3862.2 | AN4255.2 | AN4871.2 | AN4957.2 | AN5454.2 | AN7864.2 | AN8401.2	0.00791278	0.0340249	11 / 42	11 / 2143
680	Methane metabolism	Metabolism	AN0034.2 | AN0567.2 | AN2334.2 | AN6525.2 | AN8551.2 | AN8782.2 | AN8935.2	0.00831436	0.0340493	7 / 21	7 / 2143
52	Galactose metabolism	Metabolism	AN0941.2 | AN3184.2 | AN3201.2 | AN4255.2 | AN4957.2 | AN6388.2 | AN7345.2	0.0109881	0.0429536	7 / 22	7 / 2143
592	alpha-Linolenic acid metabolism	Metabolism	AN1713.2 | AN5646.2 | AN5698.2	0.0139574	0.048808	3 / 5	3 / 2143
72	Synthesis and degradation of ketone bodies	Metabolism	AN5273.2 | AN5669.2 | AN9394.2	0.0139574	0.048808	3 / 5	3 / 2143
downregulated genes
FunCat ID	FunCat description	FunCat main category	Gene ID(s)	Exact p-value	Adjusted p-value	# genes / category	# genes / input
02.13.03	aerobic respiration	Energy	ANIA_00252 | ANIA_00357 | ANIA_00432 | ANIA_00747 | ANIA_01094 | ANIA_01104 | ANIA_01444 | ANIA_01523 | ANIA_01624 | ANIA_01722 | ANIA_01743 | ANIA_01915 | ANIA_02052 | ANIA_02099 | ANIA_02306 | ANIA_02315 | ANIA_02316 | ANIA_02414 | ANIA_03034 | ANIA_03738 | ANIA_04064 | ANIA_04388 | ANIA_04402 | ANIA_04525 | ANIA_04753 | ANIA_05083 | ANIA_05497 | ANIA_06255 | ANIA_06386 | ANIA_06397 | ANIA_0659…	6.458447e-11	3.112971e-8	40 / 93	40 / 1701
2.13	respiration	Energy	ANIA_00252 | ANIA_00357 | ANIA_00432 | ANIA_00726 | ANIA_00943 | ANIA_01094 | ANIA_01396 | ANIA_01523 | ANIA_01534 | ANIA_01624 | ANIA_01915 | ANIA_02099 | ANIA_02299 | ANIA_02306 | ANIA_02315 | ANIA_02590 | ANIA_03843 | ANIA_03922 | ANIA_04126 | ANIA_04424 | ANIA_04483 | ANIA_04525 | ANIA_04557 | ANIA_04863 | ANIA_04888 | ANIA_06386 | ANIA_06572 | ANIA_07141 | ANIA_07500 | ANIA_08099 | ANIA_0811…	4.793461e-8	1.15522e-05	35 / 92	35 / 1701
1.02	nitrogen, sulfur and selenium metabolism	Metabolism	ANIA_00215 | ANIA_00232 | ANIA_00399 | ANIA_01006 | ANIA_01007 | ANIA_01008 | ANIA_01150 | ANIA_01752 | ANIA_01769 | ANIA_01825 | ANIA_01923 | ANIA_01993 | ANIA_02197 | ANIA_02287 | ANIA_02944 | ANIA_02960 | ANIA_03027 | ANIA_03239 | ANIA_03275 | ANIA_03355 | ANIA_04110 | ANIA_04111 | ANIA_04120 | ANIA_04159 | ANIA_04376 | ANIA_04401 | ANIA_04603 | ANIA_04655 | ANIA_04770 | ANIA_05134 | ANIA_0541…	2.892694e-7	4.64759e-05	55 / 187	55 / 1701
2.01	glycolysis and gluconeogenesis	Energy	ANIA_00628 | ANIA_00688 | ANIA_00887 | ANIA_01246 | ANIA_01396 | ANIA_02286 | ANIA_02875 | ANIA_02951 | ANIA_02981 | ANIA_03059 | ANIA_03223 | ANIA_04727 | ANIA_05144 | ANIA_05162 | ANIA_05210 | ANIA_05355 | ANIA_05604 | ANIA_05746 | ANIA_05790 | ANIA_05843 | ANIA_05908 | ANIA_06708 | ANIA_06900 | ANIA_07459 | ANIA_08041 | ANIA_08720 | ANIA_08985 | ANIA_09148 | ANIA_09403 | ANIA_10667 | ANIA_11094	1.49884e-06	0.000180611	31 / 87	31 / 1701
20.01.11	amine / polyamine transport	Cellular transport, transport facilitation and transport routes	ANIA_00332 | ANIA_00418 | ANIA_00856 | ANIA_01061 | ANIA_02287 | ANIA_02822 | ANIA_02962 | ANIA_03347 | ANIA_03352 | ANIA_04119 | ANIA_04313 | ANIA_04478 | ANIA_05329 | ANIA_05540 | ANIA_06774 | ANIA_07295 | ANIA_07373 | ANIA_07392 | ANIA_07618 | ANIA_08122 | ANIA_08416 | ANIA_08726 | ANIA_08966 | ANIA_08990 | ANIA_10905	2.27478e-06	0.000219289	25 / 64	25 / 1701
01.20.19.01	metabolism of porphyrins	Metabolism	ANIA_01650 | ANIA_01722 | ANIA_01915 | ANIA_02284 | ANIA_02733 | ANIA_03920 | ANIA_04415 | ANIA_04774 | ANIA_05130 | ANIA_05132 | ANIA_06645 | ANIA_06659 | ANIA_07752 | ANIA_10913	4.63551e-06	0.000372386	14 / 26	14 / 1701
2.11	electron transport and membrane-associated energy conservation	Energy	ANIA_00252 | ANIA_00330 | ANIA_00357 | ANIA_00432 | ANIA_00747 | ANIA_00943 | ANIA_01094 | ANIA_01444 | ANIA_01523 | ANIA_01534 | ANIA_01624 | ANIA_02306 | ANIA_02315 | ANIA_02316 | ANIA_02414 | ANIA_02590 | ANIA_02682 | ANIA_04126 | ANIA_04388 | ANIA_04424 | ANIA_04525 | ANIA_04859 | ANIA_05228 | ANIA_06167 | ANIA_06255 | ANIA_06386 | ANIA_06753 | ANIA_07500 | ANIA_07922 | ANIA_08118 | ANIA_0827…	5.74569e-06	0.000395632	36 / 114	36 / 1701
20.01.15	electron transport	Cellular transport, transport facilitation and transport routes	ANIA_00170 | ANIA_00174 | ANIA_00252 | ANIA_00330 | ANIA_00357 | ANIA_00432 | ANIA_00595 | ANIA_00747 | ANIA_00836 | ANIA_00943 | ANIA_01003 | ANIA_01006 | ANIA_01094 | ANIA_01104 | ANIA_01396 | ANIA_01510 | ANIA_01523 | ANIA_01534 | ANIA_01624 | ANIA_01748 | ANIA_01752 | ANIA_01825 | ANIA_02042 | ANIA_02306 | ANIA_02315 | ANIA_02316 | ANIA_02414 | ANIA_02590 | ANIA_02682 | ANIA_02704 | ANIA_0272…	2.70447e-05	0.00162944	77 / 329	77 / 1701
20.01.07	amino acid/amino acid derivatives transport	Cellular transport, transport facilitation and transport routes	ANIA_00010 | ANIA_00856 | ANIA_01061 | ANIA_01199 | ANIA_01631 | ANIA_01732 | ANIA_02201 | ANIA_02287 | ANIA_02531 | ANIA_02962 | ANIA_03347 | ANIA_03352 | ANIA_03888 | ANIA_04328 | ANIA_04478 | ANIA_06087 | ANIA_06703 | ANIA_07138 | ANIA_07392 | ANIA_07916 | ANIA_08279 | ANIA_08556 | ANIA_08726 | ANIA_08785 | ANIA_08816 | ANIA_08966 | ANIA_08990 | ANIA_09033 | ANIA_10905	0.000205783	0.0110208	29 / 99	29 / 1701
01.07.01	biosynthesis of vitamins, cofactors, and prosthetic groups	Metabolism	ANIA_00836 | ANIA_00856 | ANIA_01102 | ANIA_01722 | ANIA_01743 | ANIA_01767 | ANIA_01778 | ANIA_01915 | ANIA_01999 | ANIA_02284 | ANIA_02435 | ANIA_02436 | ANIA_02733 | ANIA_03414 | ANIA_03431 | ANIA_03586 | ANIA_03920 | ANIA_04126 | ANIA_04757 | ANIA_04774 | ANIA_04888 | ANIA_05130 | ANIA_05200 | ANIA_05435 | ANIA_05497 | ANIA_05586 | ANIA_06550 | ANIA_06644 | ANIA_06645 | ANIA_07469 | ANIA_0765…	0.000300382	0.0125789	40 / 155	40 / 1701
16.21.05	FAD/FMN binding	Protein with binding function or cofactor requirement (structural or analytic)	ANIA_00174 | ANIA_00432 | ANIA_00595 | ANIA_00836 | ANIA_01006 | ANIA_01007 | ANIA_01310 | ANIA_01396 | ANIA_01752 | ANIA_01787 | ANIA_02042 | ANIA_02414 | ANIA_02574 | ANIA_02682 | ANIA_02704 | ANIA_03586 | ANIA_03920 | ANIA_04110 | ANIA_04120 | ANIA_05200 | ANIA_05228 | ANIA_05258 | ANIA_05276 | ANIA_05338 | ANIA_05846 | ANIA_05909 | ANIA_06386 | ANIA_07274 | ANIA_08206 | ANIA_08360 | ANIA_0854…	0.000302256	0.0125789	37 / 140	37 / 1701
1.05	C-compound and carbohydrate metabolism	Metabolism	ANIA_00009 | ANIA_00054 | ANIA_00240 | ANIA_00517 | ANIA_00549 | ANIA_00551 | ANIA_00628 | ANIA_00688 | ANIA_00836 | ANIA_00887 | ANIA_00912 | ANIA_01003 | ANIA_01142 | ANIA_01246 | ANIA_01310 | ANIA_01312 | ANIA_01396 | ANIA_01472 | ANIA_01547 | ANIA_01548 | ANIA_01568 | ANIA_01617 | ANIA_01620 | ANIA_01743 | ANIA_01786 | ANIA_01787 | ANIA_01831 | ANIA_01938 | ANIA_02010 | ANIA_02037 | ANIA_0211…	0.000313167	0.0125789	174 / 919	174 / 1701
01.05.02.07	sugar, glucoside, polyol and carboxylate catabolism	Metabolism	ANIA_00240 | ANIA_00688 | ANIA_01003 | ANIA_01246 | ANIA_01396 | ANIA_01568 | ANIA_02314 | ANIA_02612 | ANIA_02875 | ANIA_02981 | ANIA_03223 | ANIA_03307 | ANIA_03308 | ANIA_03336 | ANIA_03466 | ANIA_03679 | ANIA_03894 | ANIA_04336 | ANIA_04727 | ANIA_04852 | ANIA_05017 | ANIA_05144 | ANIA_05206 | ANIA_05210 | ANIA_05262 | ANIA_05547 | ANIA_05563 | ANIA_05586 | ANIA_05604 | ANIA_05746 | ANIA_0579…	0.000386261	0.0143214	55 / 235	55 / 1701
01.06.06.11	tetracyclic and pentacyclic triterpenes (cholesterin, steroids and hopanoids) metabolism	Metabolism	ANIA_00432 | ANIA_00451 | ANIA_00595 | ANIA_00640 | ANIA_01006 | ANIA_01593 | ANIA_01614 | ANIA_01901 | ANIA_02119 | ANIA_02311 | ANIA_03305 | ANIA_03638 | ANIA_03869 | ANIA_04042 | ANIA_04094 | ANIA_04117 | ANIA_04923 | ANIA_05368 | ANIA_05563 | ANIA_05585 | ANIA_06386 | ANIA_06506 | ANIA_06973 | ANIA_07211 | ANIA_07661 | ANIA_08012 | ANIA_08398 | ANIA_08896 | ANIA_08907 | ANIA_11008	0.000624146	0.0214885	30 / 110	30 / 1701
32.05.05	virulence, disease factors	Cell rescue, defense and virulence	ANIA_00550 | ANIA_00836 | ANIA_00857 | ANIA_01312 | ANIA_01607 | ANIA_02035 | ANIA_02044 | ANIA_02587 | ANIA_02649 | ANIA_02683 | ANIA_02726 | ANIA_03282 | ANIA_03321 | ANIA_03395 | ANIA_04852 | ANIA_05943 | ANIA_06431 | ANIA_06924 | ANIA_06946 | ANIA_07084 | ANIA_07232 | ANIA_07523 | ANIA_07735 | ANIA_08548 | ANIA_08910 | ANIA_08943 | ANIA_08984 | ANIA_09203 | ANIA_10079 | ANIA_10469 | ANIA_1051…	0.000871078	0.0279906	32 / 122	32 / 1701
01.05.02.04	sugar, glucoside, polyol and carboxylate anabolism	Metabolism	ANIA_00240 | ANIA_00688 | ANIA_01003 | ANIA_01246 | ANIA_03223 | ANIA_03466 | ANIA_03894 | ANIA_04336 | ANIA_04727 | ANIA_05017 | ANIA_05144 | ANIA_05206 | ANIA_05210 | ANIA_05547 | ANIA_05586 | ANIA_05604 | ANIA_05790 | ANIA_06717 | ANIA_06874 | ANIA_07590 | ANIA_07625 | ANIA_08041 | ANIA_08275 | ANIA_08639 | ANIA_09148 | ANIA_09180	0.000943935	0.028436	26 / 93	26 / 1701
GO ID	GO name	GO namespace	Gene ID(s)	Exact p-value	Adjusted p-value	# genes / category	# genes / input
GO:0005739	mitochondrion	CC	AN3894 | AN10466 | AN2099 | AN10778 | AN6010 | AN9400 | AN5867 | AN10923 | AN1624 | AN5200 | AN8275 | AN4757 | AN1722 | AN6246 | AN3853 | AN2284 | AN6089 | AN7459 | AN6521 | AN0432 | AN2055 | AN2223 | AN3843 | AN7722 | AN3004 | AN6193 | AN3831 | AN6306	1.387775e-7	7.09153e-05	28 / 73	28 / 1701
GO:0006950	response to stress	BP	AN0656 | AN1769 | AN2204 | AN4029 | AN6010 | AN7484 | AN7895 | AN6246 | AN5746 | AN8041 | AN2530 | AN6089 | AN5129 | AN2968	6.439821e-7	0.000164537	14 / 24	14 / 1701
GO:0071470	cellular response to osmotic stress	BP	AN0656 | AN1769 | AN2204 | AN4029 | AN6010 | AN7484 | AN7895 | AN5746 | AN8041 | AN6089 | AN5129 | AN2968	3.74477e-05	0.00478949	12 / 24	12 / 1701
GO:0006096	glycolytic process	BP	AN5746 | AN8041 | AN7459 | AN0887 | AN1246 | AN5210 | AN6900	3.74911e-05	0.00478949	7 / 9	7 / 1701
GO:0006094	gluconeogenesis	BP	AN5746 | AN8041 | AN7459 | AN0887 | AN1246 | AN5210 | AN6900	0.000264527	0.0270347	7 / 11	7 / 1701
KEGG pathway ID	KEGG pathway name	KEGG main category	Gene ID(s)	Exact p-value	Adjusted p-value	# genes / category	# genes / input
1100	Metabolic pathways	Metabolism	AN0174.2 | AN0240.2 | AN0252.2 | AN0285.2 | AN0357.2 | AN0451.2 | AN0640.2 | AN0688.2 | AN0840.2 | AN0912.2 | AN0913.2 | AN0929.2 | AN0943.2 | AN1003.2 | AN1102.2 | AN1150.2 | AN1198.2 | AN1246.2 | AN1376.2 | AN1523.2 | AN1534.2 | AN1624.2 | AN1722.2 | AN1743.2 | AN1752.2 | AN1769.2 | AN1778.2 | AN1901.2 | AN1915.2 | AN1923.2 | AN1993.2 | AN2272.2 | AN2284.2 | AN2286.2 | AN2306.2 | AN2311.2 | AN2…	6.614412e-17	6.7467e-15	169 / 680	169 / 1701
1110	Biosynthesis of secondary metabolites	Metabolism	AN0240.2 | AN0285.2 | AN0432.2 | AN0688.2 | AN0840.2 | AN0912.2 | AN1003.2 | AN1150.2 | AN1246.2 | AN1722.2 | AN1743.2 | AN1778.2 | AN1901.2 | AN1915.2 | AN1993.2 | AN2286.2 | AN2311.2 | AN2314.2 | AN2435.2 | AN2436.2 | AN2526.2 | AN2532.2 | AN2733.2 | AN2875.2 | AN2951.2 | AN2981.2 | AN3059.2 | AN3223.2 | AN3277.2 | AN3466.2 | AN3586.2 | AN3869.2 | AN3920.2 | AN3954.2 | AN4094.2 | AN4401.2 | AN4…	4.701253e-12	2.397639e-10	86 / 281	86 / 1701
190	Oxidative phosphorylation	Metabolism	AN0252.2 | AN0357.2 | AN0943.2 | AN1523.2 | AN1534.2 | AN1624.2 | AN1722.2 | AN1915.2 | AN2306.2 | AN2315.2 | AN2316.2 | AN2414.2 | AN2968.2 | AN3922.2 | AN4388.2 | AN4525.2 | AN4859.2 | AN4863.2 | AN4927.2 | AN5597.2 | AN6255.2 | AN7500.2 | AN8118.2 | AN8273.2 | ANID_20002 | ANID_20005 | ANID_20008 | ANID_20010 | ANID_20011 | ANID_20012	6.841091e-9	2.325971e-7	30 / 66	30 / 1701
1200	Carbon metabolism	Metabolism	AN0240.2 | AN0285.2 | AN0688.2 | AN1003.2 | AN1198.2 | AN1246.2 | AN1923.2 | AN1993.2 | AN2875.2 | AN2981.2 | AN3059.2 | AN3223.2 | AN3466.2 | AN3954.2 | AN5162.2 | AN5210.2 | AN5604.2 | AN5746.2 | AN5790.2 | AN5843.2 | AN5907.2 | AN5908.2 | AN6048.2 | AN6168.2 | AN6708.2 | AN6717.2 | AN6900.2 | AN6933.2 | AN7459.2 | AN8041.2 | AN8275.2 | AN8277.2 | AN8689.2 | AN8720.2 | AN8866.2 | AN9403.2	3.693349e-8	9.418039e-7	36 / 93	36 / 1701
10	Glycolysis / Gluconeogenesis	Metabolism	AN1246.2 | AN2286.2 | AN2875.2 | AN3059.2 | AN3223.2 | AN4591.2 | AN4888.2 | AN5162.2 | AN5210.2 | AN5604.2 | AN5746.2 | AN5908.2 | AN6708.2 | AN6900.2 | AN7459.2 | AN8041.2 | AN8689.2 | AN8720.2 | AN9403.2	7.884392e-7	1.60842e-05	19 / 38	19 / 1701
1230	Biosynthesis of amino acids	Metabolism	AN0240.2 | AN0688.2 | AN0840.2 | AN0912.2 | AN1003.2 | AN1150.2 | AN1246.2 | AN1923.2 | AN1993.2 | AN2526.2 | AN2875.2 | AN3059.2 | AN3223.2 | AN3894.2 | AN4159.2 | AN4443.2 | AN5134.2 | AN5206.2 | AN5210.2 | AN5731.2 | AN5746.2 | AN5790.2 | AN5867.2 | AN5907.2 | AN5908.2 | AN6048.2 | AN6231.2 | AN6346.2 | AN6521.2 | AN6900.2 | AN7358.2 | AN7722.2 | AN8041.2 | AN8275.2 | AN8277.2 | AN8720.2 | AN8…	2.63518e-06	4.4798e-05	37 / 112	37 / 1701
1210	2-Oxocarboxylic acid metabolism	Metabolism	AN0840.2 | AN0912.2 | AN1003.2 | AN1150.2 | AN1923.2 | AN1993.2 | AN2526.2 | AN3894.2 | AN5206.2 | AN5790.2 | AN5867.2 | AN6048.2 | AN6346.2 | AN6521.2 | AN7358.2 | AN7722.2 | AN8275.2	1.34347e-05	0.000195762	17 / 37	17 / 1701
100	Steroid biosynthesis	Metabolism	AN0451.2 | AN1901.2 | AN4042.2 | AN4094.2 | AN5585.2 | AN6506.2 | AN7211.2 | AN8907.2	0.000105918	0.00135046	8 / 12	8 / 1701
860	Porphyrin and chlorophyll metabolism	Metabolism	AN1722.2 | AN1915.2 | AN2284.2 | AN2733.2 | AN3920.2 | AN4415.2 | AN4774.2 | AN5130.2 | AN7752.2	0.000122801	0.00139174	9 / 15	9 / 1701
910	Nitrogen metabolism	Metabolism	AN0399.2 | AN1006.2 | AN1007.2 | AN1008.2 | AN4120.2 | AN4159.2 | AN4376.2 | AN5134.2 | AN5611.2	0.000442751	0.00418351	9 / 17	9 / 1701
620	Pyruvate metabolism	Metabolism	AN0628.2 | AN0840.2 | AN1547.2 | AN4424.2 | AN5162.2 | AN5210.2 | AN5843.2 | AN6126.2 | AN6168.2 | AN6708.2 | AN6717.2 | AN6933.2 | AN9403.2	0.000451163	0.00418351	13 / 31	13 / 1701
51	Fructose and mannose metabolism	Metabolism	AN2875.2 | AN3223.2 | AN4336.2 | AN5144.2 | AN5586.2 | AN5604.2 | AN5907.2 | AN5908.2 | AN6900.2 | AN7459.2 | AN8689.2	0.000772781	0.00656864	11 / 25	11 / 1701
920	Sulfur metabolism	Metabolism	AN1752.2 | AN1769.2 | AN1825.2 | AN4770.2 | AN6246.2 | AN8277.2 | AN8346.2 | AN9191.2	0.000884425	0.00693933	8 / 15	8 / 1701
30	Pentose phosphate pathway	Metabolism	AN0240.2 | AN0285.2 | AN0688.2 | AN2875.2 | AN2981.2 | AN3223.2 | AN3954.2 | AN4591.2 | AN5604.2 | AN5907.2	0.000992632	0.00723203	10 / 22	10 / 1701
52	Galactose metabolism	Metabolism	AN2951.2 | AN3223.2 | AN4591.2 | AN4727.2 | AN7459.2 | AN7624.2 | AN8689.2 | AN8953.2 | AN9148.2	0.00431855	0.0286346	9 / 22	9 / 1701
20	Citrate cycle (TCA cycle)	Metabolism	AN1003.2 | AN2435.2 | AN2436.2 | AN3466.2 | AN5162.2 | AN5790.2 | AN6708.2 | AN6717.2 | AN8275.2 | AN9403.2	0.0044917	0.0286346	10 / 26	10 / 1701
250	Alanine, aspartate and glutamate metabolism	Metabolism	AN1923.2 | AN1993.2 | AN4159.2 | AN4376.2 | AN4401.2 | AN5134.2 | AN5447.2 | AN6048.2 | AN7278.2 | AN8754.2	0.00824756	0.0494854	10 / 28	10 / 1701

## Sheet: Sheet 3
Carbon starved cultures vs. Glucose containing cultures
upregulated genes
FunCat ID	FunCat description	FunCat main category	Gene ID(s)	Exact p-value	Adjusted p-value	# genes / category	# genes / input
1.2	secondary metabolism	Metabolism	ANIA_00013 | ANIA_00015 | ANIA_00018 | ANIA_00027 | ANIA_00036 | ANIA_00051 | ANIA_00077 | ANIA_00147 | ANIA_00149 | ANIA_00150 | ANIA_00195 | ANIA_00208 | ANIA_00209 | ANIA_00231 | ANIA_00338 | ANIA_00370 | ANIA_00374 | ANIA_00382 | ANIA_00459 | ANIA_00489 | ANIA_00501 | ANIA_00529 | ANIA_00533 | ANIA_00547 | ANIA_00567 | ANIA_00586 | ANIA_00606 | ANIA_00608 | ANIA_00613 | ANIA_00654 | ANIA_0067…	4.840314e-41	2.255586e-38	389 / 1068	389 / 2370
1.05	C-compound and carbohydrate metabolism	Metabolism	ANIA_00023 | ANIA_00024 | ANIA_00034 | ANIA_00036 | ANIA_00050 | ANIA_00100 | ANIA_00146 | ANIA_00156 | ANIA_00180 | ANIA_00194 | ANIA_00221 | ANIA_00245 | ANIA_00322 | ANIA_00370 | ANIA_00472 | ANIA_00501 | ANIA_00541 | ANIA_00554 | ANIA_00567 | ANIA_00574 | ANIA_00593 | ANIA_00608 | ANIA_00649 | ANIA_00675 | ANIA_00712 | ANIA_00740 | ANIA_00758 | ANIA_00761 | ANIA_00765 | ANIA_00784 | ANIA_0078…	2.93631e-18	6.841603e-16	291 / 919	291 / 2370
20.09.18.07	non-vesicular cellular import	Cellular transport, transport facilitation and transport routes	ANIA_00013 | ANIA_00209 | ANIA_00250 | ANIA_00374 | ANIA_00382 | ANIA_00497 | ANIA_00501 | ANIA_00614 | ANIA_00811 | ANIA_01073 | ANIA_01109 | ANIA_01185 | ANIA_01581 | ANIA_01659 | ANIA_01681 | ANIA_01865 | ANIA_02074 | ANIA_02282 | ANIA_02344 | ANIA_02358 | ANIA_02372 | ANIA_02544 | ANIA_02729 | ANIA_02730 | ANIA_02781 | ANIA_02814 | ANIA_02869 | ANIA_03066 | ANIA_03195 | ANIA_03204 | ANIA_0321…	1.453544e-17	2.257839e-15	109 / 248	109 / 2370
1.06	lipid, fatty acid and isoprenoid metabolism	Metabolism	ANIA_00027 | ANIA_00034 | ANIA_00147 | ANIA_00180 | ANIA_00322 | ANIA_00370 | ANIA_00554 | ANIA_00609 | ANIA_00664 | ANIA_00666 | ANIA_00783 | ANIA_00824 | ANIA_00868 | ANIA_00925 | ANIA_00971 | ANIA_01014 | ANIA_01050 | ANIA_01059 | ANIA_01078 | ANIA_01136 | ANIA_01148 | ANIA_01294 | ANIA_01314 | ANIA_01428 | ANIA_01433 | ANIA_01482 | ANIA_01502 | ANIA_01580 | ANIA_01671 | ANIA_01699 | ANIA_0171…	2.845835e-13	3.315398e-11	201 / 624	201 / 2370
20.01.23	allantoin and allantoate transport	Cellular transport, transport facilitation and transport routes	ANIA_00497 | ANIA_00614 | ANIA_00811 | ANIA_01185 | ANIA_01681 | ANIA_02282 | ANIA_02344 | ANIA_02729 | ANIA_03066 | ANIA_03195 | ANIA_03221 | ANIA_04097 | ANIA_04106 | ANIA_04628 | ANIA_04826 | ANIA_05032 | ANIA_06461 | ANIA_06778 | ANIA_07027 | ANIA_07157 | ANIA_07380 | ANIA_07648 | ANIA_08595 | ANIA_08623 | ANIA_08814 | ANIA_08901 | ANIA_08936 | ANIA_08955 | ANIA_08996 | ANIA_09010 | ANIA_0929…	6.006348e-11	5.597917e-9	41 / 75	41 / 2370
20.09.18	cellular import	Cellular transport, transport facilitation and transport routes	ANIA_00013 | ANIA_00209 | ANIA_00250 | ANIA_00374 | ANIA_00497 | ANIA_00614 | ANIA_00811 | ANIA_01073 | ANIA_01109 | ANIA_01185 | ANIA_01581 | ANIA_01659 | ANIA_01681 | ANIA_01702 | ANIA_01865 | ANIA_02282 | ANIA_02321 | ANIA_02344 | ANIA_02372 | ANIA_02465 | ANIA_02591 | ANIA_02601 | ANIA_02663 | ANIA_02729 | ANIA_02730 | ANIA_02781 | ANIA_02814 | ANIA_02869 | ANIA_03066 | ANIA_03195 | ANIA_0320…	2.473688e-10	1.921231e-8	106 / 295	106 / 2370
20.01.03	C-compound and carbohydrate transport	Cellular transport, transport facilitation and transport routes	ANIA_00013 | ANIA_00208 | ANIA_00250 | ANIA_00382 | ANIA_00501 | ANIA_01059 | ANIA_01109 | ANIA_01308 | ANIA_01702 | ANIA_01839 | ANIA_01865 | ANIA_01917 | ANIA_02321 | ANIA_02358 | ANIA_02372 | ANIA_02465 | ANIA_02544 | ANIA_02591 | ANIA_02601 | ANIA_02663 | ANIA_02814 | ANIA_02869 | ANIA_03066 | ANIA_03204 | ANIA_03210 | ANIA_03220 | ANIA_03233 | ANIA_03515 | ANIA_03658 | ANIA_03722 | ANIA_0391…	4.623903e-9	3.078198e-7	97 / 275	97 / 2370
20.03	transport facilities	Cellular transport, transport facilitation and transport routes	ANIA_00013 | ANIA_00209 | ANIA_00382 | ANIA_00471 | ANIA_00497 | ANIA_00501 | ANIA_00614 | ANIA_00811 | ANIA_01059 | ANIA_01073 | ANIA_01185 | ANIA_01290 | ANIA_01308 | ANIA_01423 | ANIA_01659 | ANIA_01681 | ANIA_01702 | ANIA_01839 | ANIA_01865 | ANIA_01917 | ANIA_02074 | ANIA_02282 | ANIA_02321 | ANIA_02344 | ANIA_02358 | ANIA_02372 | ANIA_02465 | ANIA_02544 | ANIA_02591 | ANIA_02601 | ANIA_0266…	1.830834e-8	1.06646e-06	143 / 460	143 / 2370
01.05.03	polysaccharide metabolism	Metabolism	ANIA_00221 | ANIA_00472 | ANIA_00541 | ANIA_00712 | ANIA_00779 | ANIA_00787 | ANIA_01043 | ANIA_01046 | ANIA_01257 | ANIA_01332 | ANIA_01477 | ANIA_01502 | ANIA_01742 | ANIA_01772 | ANIA_01870 | ANIA_02356 | ANIA_02395 | ANIA_02541 | ANIA_02828 | ANIA_03201 | ANIA_03337 | ANIA_03388 | ANIA_03389 | ANIA_03402 | ANIA_03733 | ANIA_03777 | ANIA_03790 | ANIA_03837 | ANIA_03903 | ANIA_04040 | ANIA_0405…	2.096636e-8	1.08559e-06	84 / 234	84 / 2370
32.07	detoxification	Cell rescue, defense and virulence	ANIA_00024 | ANIA_00027 | ANIA_00100 | ANIA_00147 | ANIA_00374 | ANIA_00785 | ANIA_00788 | ANIA_01089 | ANIA_01174 | ANIA_01423 | ANIA_01688 | ANIA_01724 | ANIA_01877 | ANIA_02355 | ANIA_02368 | ANIA_02593 | ANIA_02629 | ANIA_02651 | ANIA_02669 | ANIA_02707 | ANIA_02788 | ANIA_02798 | ANIA_03301 | ANIA_03329 | ANIA_03398 | ANIA_03509 | ANIA_03741 | ANIA_03849 | ANIA_03952 | ANIA_04019 | ANIA_0481…	5.896872e-8	2.74794e-06	77 / 213	77 / 2370
2.25	oxidation of fatty acids	Energy	ANIA_00180 | ANIA_00370 | ANIA_00824 | ANIA_00868 | ANIA_01050 | ANIA_01078 | ANIA_01699 | ANIA_01840 | ANIA_02529 | ANIA_02577 | ANIA_02716 | ANIA_03880 | ANIA_04009 | ANIA_04353 | ANIA_04688 | ANIA_05269 | ANIA_05287 | ANIA_05484 | ANIA_05646 | ANIA_05852 | ANIA_05916 | ANIA_06649 | ANIA_06765 | ANIA_07008 | ANIA_07111 | ANIA_07320 | ANIA_08280 | ANIA_08415 | ANIA_09041 | ANIA_09128 | ANIA_0916…	8.109604e-8	3.43552e-06	32 / 63	32 / 2370
01.06.05	fatty acid metabolism	Metabolism	ANIA_00146 | ANIA_00322 | ANIA_00370 | ANIA_00574 | ANIA_00784 | ANIA_00824 | ANIA_00868 | ANIA_01014 | ANIA_01050 | ANIA_01059 | ANIA_01078 | ANIA_01763 | ANIA_01822 | ANIA_01886 | ANIA_02039 | ANIA_02529 | ANIA_02577 | ANIA_02716 | ANIA_03318 | ANIA_03349 | ANIA_03380 | ANIA_03381 | ANIA_03575 | ANIA_03862 | ANIA_03880 | ANIA_04009 | ANIA_04687 | ANIA_04690 | ANIA_05269 | ANIA_05287 | ANIA_0537…	1.449791e-7	5.63002e-06	64 / 170	64 / 2370
20.01.25	vitamine/cofactor transport	Cellular transport, transport facilitation and transport routes	ANIA_00614 | ANIA_01681 | ANIA_02282 | ANIA_02321 | ANIA_02344 | ANIA_02663 | ANIA_02729 | ANIA_03066 | ANIA_03221 | ANIA_04097 | ANIA_04106 | ANIA_04826 | ANIA_05032 | ANIA_06381 | ANIA_06778 | ANIA_07027 | ANIA_07304 | ANIA_07648 | ANIA_07967 | ANIA_08198 | ANIA_08423 | ANIA_08502 | ANIA_08595 | ANIA_08623 | ANIA_08936 | ANIA_08955 | ANIA_08996 | ANIA_09010 | ANIA_09294 | ANIA_09336 | ANIA_0939…	1.636616e-7	5.86664e-06	39 / 86	39 / 2370
01.01.09.04.02	degradation of phenylalanine	Metabolism	ANIA_00459 | ANIA_00477 | ANIA_00649 | ANIA_00801 | ANIA_01895 | ANIA_01897 | ANIA_01899 | ANIA_02610 | ANIA_02674 | ANIA_04643 | ANIA_05433 | ANIA_05990 | ANIA_06101 | ANIA_06414 | ANIA_06449 | ANIA_07772 | ANIA_07824 | ANIA_08108 | ANIA_08338 | ANIA_09007 | ANIA_10028 | ANIA_10074 | ANIA_10259 | ANIA_10612 | ANIA_10657 | ANIA_10950 | ANIA_11034	3.10778e-06	0.000103445	27 / 56	27 / 2370
01.01.09.04.01	biosynthesis of phenylalanine	Metabolism	ANIA_00459 | ANIA_00649 | ANIA_00801 | ANIA_01899 | ANIA_02610 | ANIA_02674 | ANIA_04643 | ANIA_05433 | ANIA_05990 | ANIA_06101 | ANIA_06414 | ANIA_06449 | ANIA_07772 | ANIA_07824 | ANIA_08338 | ANIA_09007 | ANIA_10028 | ANIA_10074 | ANIA_10259 | ANIA_10599 | ANIA_10602 | ANIA_10657 | ANIA_10950 | ANIA_11034	2.76468e-05	0.000858895	24 / 52	24 / 2370
01.06.06.05	sesquiterpenes metabolism	Metabolism	ANIA_00338 | ANIA_00606 | ANIA_02040 | ANIA_05360 | ANIA_06407 | ANIA_07818 | ANIA_08309 | ANIA_09313 | ANIA_10573 | ANIA_10811 | ANIA_10887 | ANIA_11013	6.36785e-05	0.00184587	12 / 19	12 / 2370
32.07.01	detoxification involving cytochrome P450	Cell rescue, defense and virulence	ANIA_00338 | ANIA_00459 | ANIA_01884 | ANIA_02040 | ANIA_02607 | ANIA_02706 | ANIA_03256 | ANIA_03349 | ANIA_03570 | ANIA_04643 | ANIA_05360 | ANIA_05433 | ANIA_05665 | ANIA_06407 | ANIA_06414 | ANIA_06449 | ANIA_07772 | ANIA_07808 | ANIA_07824 | ANIA_08250 | ANIA_08309 | ANIA_08338 | ANIA_08437 | ANIA_08438 | ANIA_08579 | ANIA_08615 | ANIA_09313 | ANIA_10028 | ANIA_10259 | ANIA_10479 | ANIA_1057…	6.73387e-05	0.00184587	34 / 88	34 / 2370
16.05	polysaccharide binding	Protein with binding function or cofactor requirement (structural or analytic)	ANIA_00221 | ANIA_00541 | ANIA_02356 | ANIA_03790 | ANIA_04823 | ANIA_04871 | ANIA_05061 | ANIA_05454 | ANIA_06389 | ANIA_07349 | ANIA_07613 | ANIA_08481 | ANIA_09042 | ANIA_09390 | ANIA_11064 | ANIA_11233	0.000117621	0.00304507	16 / 31	16 / 2370
01.20.05.11	metabolism of polyketides	Metabolism	ANIA_00150 | ANIA_01036 | ANIA_03230 | ANIA_03386 | ANIA_03887 | ANIA_04827 | ANIA_06000 | ANIA_06431 | ANIA_06444 | ANIA_06448 | ANIA_06791 | ANIA_07071 | ANIA_07815 | ANIA_07825 | ANIA_07909 | ANIA_08383 | ANIA_08513 | ANIA_09005 | ANIA_10297 | ANIA_11191	0.000166636	0.00408697	20 / 44	20 / 2370
32.05.05.01	toxins	Cell rescue, defense and virulence	ANIA_00338 | ANIA_00541 | ANIA_02040 | ANIA_05360 | ANIA_06407 | ANIA_06448 | ANIA_07613 | ANIA_07819 | ANIA_08025 | ANIA_08309 | ANIA_08433 | ANIA_08481 | ANIA_08615 | ANIA_09244 | ANIA_09313 | ANIA_09390 | ANIA_10573 | ANIA_10887	0.000184621	0.00430166	18 / 38	18 / 2370
01.05.02.07	sugar, glucoside, polyol and carboxylate catabolism	Metabolism	ANIA_00472 | ANIA_00613 | ANIA_00675 | ANIA_00712 | ANIA_00854 | ANIA_00942 | ANIA_01043 | ANIA_01477 | ANIA_01679 | ANIA_01715 | ANIA_01870 | ANIA_01885 | ANIA_02180 | ANIA_02378 | ANIA_02395 | ANIA_02528 | ANIA_02533 | ANIA_02534 | ANIA_02828 | ANIA_02834 | ANIA_03201 | ANIA_03297 | ANIA_03312 | ANIA_03388 | ANIA_03389 | ANIA_03402 | ANIA_03613 | ANIA_03837 | ANIA_03903 | ANIA_04102 | ANIA_0411…	0.000223323	0.00495564	71 / 235	71 / 2370
32.10.09	degradation / modification of foreign (exogenous) ester compounds	Cell rescue, defense and virulence	ANIA_01294 | ANIA_03037 | ANIA_03559 | ANIA_05016 | ANIA_06383 | ANIA_06389 | ANIA_07407 | ANIA_07521 | ANIA_08242 | ANIA_09130	0.00030531	0.00646703	10 / 16	10 / 2370
01.20.36	non-ribosomal peptide synthesis	Metabolism	ANIA_00150 | ANIA_01680 | ANIA_02064 | ANIA_02545 | ANIA_02924 | ANIA_04827 | ANIA_06444 | ANIA_07815 | ANIA_08105 | ANIA_08433 | ANIA_08513 | ANIA_09129 | ANIA_09243 | ANIA_09244 | ANIA_10297 | ANIA_10576	0.000460498	0.00933009	16 / 34	16 / 2370
01.20.17.03	metabolism of amines	Metabolism	ANIA_00567 | ANIA_02566 | ANIA_03206 | ANIA_03229 | ANIA_03291 | ANIA_03960 | ANIA_05690 | ANIA_06756 | ANIA_07267 | ANIA_07408 | ANIA_07641 | ANIA_07812 | ANIA_07998 | ANIA_08454 | ANIA_08656 | ANIA_09011 | ANIA_09178	0.000641712	0.0124599	17 / 38	17 / 2370
32.10.07	degradation / modification of foreign (exogenous) polysaccharides	Cell rescue, defense and virulence	ANIA_00779 | ANIA_03337 | ANIA_03389 | ANIA_03613 | ANIA_04372 | ANIA_04825 | ANIA_05061 | ANIA_05214 | ANIA_06106 | ANIA_06656 | ANIA_06748 | ANIA_07646 | ANIA_07869	0.000766385	0.0142854	13 / 26	13 / 2370
20.03.02.02.01	proton driven symporter	Cellular transport, transport facilitation and transport routes	ANIA_02465 | ANIA_02601 | ANIA_02869 | ANIA_03204 | ANIA_03210 | ANIA_03515 | ANIA_04316 | ANIA_04621 | ANIA_05917 | ANIA_06804 | ANIA_07067 | ANIA_07119 | ANIA_07344 | ANIA_10812 | ANIA_10845	0.00108491	0.0194449	15 / 33	15 / 2370
32.07.03	detoxification by modification	Cell rescue, defense and virulence	ANIA_00147 | ANIA_00675 | ANIA_00765 | ANIA_00785 | ANIA_01131 | ANIA_01857 | ANIA_02593 | ANIA_04110 | ANIA_04625 | ANIA_05044 | ANIA_05310 | ANIA_05440 | ANIA_06383 | ANIA_07292 | ANIA_07521 | ANIA_07684 | ANIA_08470 | ANIA_09029 | ANIA_09161 | ANIA_10582	0.00125764	0.021706	20 / 50	20 / 2370
32.05.03	defense related proteins	Cell rescue, defense and virulence	ANIA_00554 | ANIA_01309 | ANIA_01433 | ANIA_01519 | ANIA_02168 | ANIA_02545 | ANIA_02621 | ANIA_03037 | ANIA_03256 | ANIA_04643 | ANIA_04893 | ANIA_05327 | ANIA_05665 | ANIA_06383 | ANIA_06389 | ANIA_06449 | ANIA_06470 | ANIA_08105 | ANIA_08141 | ANIA_08250 | ANIA_08437 | ANIA_09129 | ANIA_09248 | ANIA_09253 | ANIA_10057	0.00140375	0.0222214	25 / 68	25 / 2370
20.09.16.07	non-vesicular cellular export	Cellular transport, transport facilitation and transport routes	ANIA_00489 | ANIA_02707 | ANIA_05628 | ANIA_07167 | ANIA_10920 | ANIA_10951	0.00141689	0.0222214	6 / 8	6 / 2370
01.05.03.03.07	chitin catabolism	Metabolism	ANIA_00221 | ANIA_00541 | ANIA_04871 | ANIA_05454 | ANIA_07613 | ANIA_08481 | ANIA_09390 | ANIA_11233	0.00147825	0.0222214	8 / 13	8 / 2370
01.05.03.03	chitin metabolism	Metabolism	ANIA_00221 | ANIA_00541 | ANIA_04871 | ANIA_05454 | ANIA_07613 | ANIA_08481 | ANIA_09390 | ANIA_11233	0.00147825	0.0222214	8 / 13	8 / 2370
01.20.01.09	metabolism of aminoglycoside antibiotics	Metabolism	ANIA_00675 | ANIA_04605 | ANIA_05007 | ANIA_08496 | ANIA_10226	0.00180714	0.0263164	5 / 6	5 / 2370
01.20.35.01.01	metabolism of melanins	Metabolism	ANIA_00146 | ANIA_00231 | ANIA_00784 | ANIA_06450 | ANIA_06918 | ANIA_07806 | ANIA_08435 | ANIA_10049 | ANIA_10122 | ANIA_10335 | ANIA_10690	0.00195715	0.0276374	11 / 22	11 / 2370
32.07.05	detoxification by export	Cell rescue, defense and virulence	ANIA_00018 | ANIA_00489 | ANIA_00547 | ANIA_01174 | ANIA_01724 | ANIA_02368 | ANIA_02707 | ANIA_03041 | ANIA_03301 | ANIA_03329 | ANIA_03398 | ANIA_03884 | ANIA_03952 | ANIA_04103 | ANIA_04817 | ANIA_05559 | ANIA_05628 | ANIA_05656 | ANIA_05763 | ANIA_06277 | ANIA_06417 | ANIA_06451 | ANIA_06928 | ANIA_06942 | ANIA_07167 | ANIA_07790 | ANIA_08083 | ANIA_08089 | ANIA_08316 | ANIA_08474 | ANIA_0861…	0.00305083	0.0418143	42 / 137	42 / 2370
01.25.01	extracellular polysaccharide degradation	Metabolism	ANIA_00779 | ANIA_02528 | ANIA_03337 | ANIA_03790 | ANIA_04823 | ANIA_04825 | ANIA_05061 | ANIA_06106 | ANIA_06748 | ANIA_07349 | ANIA_07869 | ANIA_09042 | ANIA_09286 | ANIA_11064	0.00349908	0.0465878	14 / 33	14 / 2370
GO ID	GO name	GO namespace	Gene ID(s)	Exact p-value	Adjusted p-value	# genes / category	# genes / input
GO:0005576	extracellular region	CC	AN2541 | AN2534 | AN8007 | AN6525 | AN8149 | AN7345 | AN7152 | AN9286 | AN0554 | AN5558 | AN5309 | AN7180 | AN7962 | AN6093 | AN2632 | AN7908 | AN4102 | AN10482 | AN5976 | AN3903 | AN2828 | AN7396 | AN5282 | AN4871 | AN8006 | AN6438 | AN5214 | AN4052 | AN3777 | AN5626 | AN1772 | AN5267 | AN7388 | AN3297 | AN7413 | AN9276 | AN1742 | AN6888 | AN4372 | AN6656 | AN8761 | AN9045 | AN8891 | AN1685 | AN…	3.096268e-14	1.334492e-11	55 / 127	55 / 2370
GO:0005975	carbohydrate metabolic process	BP	AN2541 | AN2534 | AN8007 | AN8149 | AN7345 | AN7152 | AN9286 | AN6093 | AN2632 | AN7908 | AN4102 | AN0712 | AN10482 | AN5976 | AN3903 | AN2828 | AN7396 | AN5282 | AN4871 | AN5214 | AN4052 | AN3777 | AN1772 | AN5267 | AN3297 | AN7413 | AN9276 | AN1742 | AN0787 | AN4372 | AN6656 | AN8761 | AN9045 | AN8891 | AN7646 | AN3337 | AN6106 | AN6748 | AN7135 | AN6395 | AN9340 | AN9064 | AN3389 | AN3613	1.905965e-11	4.107355e-9	44 / 100	44 / 2370
GO:0019748	secondary metabolic process	BP	AN2621 | AN10074 | AN2622 | AN7825 | AN7824 | AN7821 | AN7818 | AN7816 | AN7815 | AN7814 | AN7811 | AN7808 | AN7807 | AN7806 | AN7805 | AN7804	1.00046e-9	1.259453e-7	16 / 20	16 / 2370
GO:0016798	hydrolase activity, acting on glycosyl bonds	MF	AN2541 | AN2534 | AN8007 | AN8149 | AN7345 | AN7152 | AN9286 | AN2632 | AN7908 | AN4102 | AN0712 | AN10482 | AN5976 | AN3903 | AN2828 | AN7396 | AN5282 | AN4871 | AN5214 | AN4052 | AN3777 | AN3297 | AN7413 | AN9276 | AN1742 | AN0787 | AN4372 | AN6656 | AN8761 | AN9045 | AN8891 | AN9340 | AN3389 | AN3613	1.168865e-9	1.259453e-7	34 / 73	34 / 2370
GO:0005575	cellular_component	CC	AN8007 | AN6525 | AN2621 | AN8149 | AN2901 | AN7345 | AN7152 | AN3741 | AN0554 | AN10074 | AN10233 | AN11015 | AN1412 | AN5342 | AN5440 | AN7962 | AN8861 | AN9274 | AN2887 | AN6093 | AN2632 | AN7908 | AN0712 | AN10482 | AN5976 | AN3903 | AN2828 | AN7396 | AN5712 | AN5282 | AN9095 | AN10380 | AN6741 | AN5214 | AN3777 | AN5626 | AN1772 | AN5267 | AN3380 | AN10516 | AN9397 | AN1897 | AN2622 | AN0005…	1.705145e-9	1.469835e-7	84 / 300	84 / 2370
GO:0008152	metabolic process	BP	AN2541 | AN2534 | AN8007 | AN6525 | AN2621 | AN8149 | AN7345 | AN7152 | AN9286 | AN0554 | AN10074 | AN11015 | AN5309 | AN7180 | AN2632 | AN7908 | AN4102 | AN0712 | AN10482 | AN5976 | AN3903 | AN2828 | AN7396 | AN1857 | AN5282 | AN4871 | AN5214 | AN4052 | AN3777 | AN5626 | AN3380 | AN10516 | AN3297 | AN7413 | AN9276 | AN1742 | AN0787 | AN4372 | AN6656 | AN8761 | AN9045 | AN8891 | AN1685 | AN1733 |…	3.847997e-9	2.764145e-7	54 / 156	54 / 2370
GO:0045461	sterigmatocystin biosynthetic process	BP	AN7820 | AN0973 | AN6650 | AN7825 | AN7824 | AN7823 | AN7821 | AN7818 | AN7816 | AN7815 | AN7814 | AN11013 | AN7811 | AN7810 | AN7808 | AN7807 | AN7806 | AN7805 | AN7804	6.20332e-9	3.819473e-7	19 / 29	19 / 2370
GO:0000272	polysaccharide catabolic process	BP	AN2541 | AN2534 | AN8007 | AN8149 | AN7345 | AN7152 | AN9286 | AN6093 | AN2632 | AN7908 | AN4102 | AN0712 | AN10482 | AN5976 | AN3903 | AN2828 | AN7396 | AN5282 | AN4871 | AN5214 | AN4052 | AN3777 | AN1772 | AN5267 | AN1742 | AN7646 | AN3337 | AN6106 | AN6748 | AN7135 | AN6395 | AN3389 | AN3613	2.118496e-8	1.14134e-06	33 / 76	33 / 2370
GO:0016787	hydrolase activity	MF	AN2541 | AN2534 | AN8007 | AN8149 | AN2901 | AN7345 | AN7152 | AN9286 | AN5558 | AN10929 | AN5309 | AN7180 | AN7962 | AN8861 | AN5919 | AN3470 | AN6093 | AN2632 | AN7908 | AN4102 | AN0712 | AN10482 | AN5976 | AN3903 | AN2828 | AN7396 | AN1857 | AN5712 | AN5282 | AN4871 | AN2946 | AN10380 | AN6438 | AN5214 | AN4052 | AN3777 | AN1772 | AN5267 | AN3297 | AN7413 | AN9276 | AN1742 | AN0787 | AN6888 | …	3.015617e-7	1.44415e-05	57 / 187	57 / 2370
GO:0016491	oxidoreductase activity	MF	AN6525 | AN3741 | AN0554 | AN10233 | AN5440 | AN3380 | AN1897 | AN2622 | AN7388 | AN8168 | AN1733 | AN7824 | AN7823 | AN7821 | AN7818 | AN7815 | AN7814 | AN11013 | AN7811 | AN7810 | AN7808 | AN7806 | AN7805 | AN7804 | AN9064	1.19999e-05	0.000517194	25 / 63	25 / 2370
GO:0055114	oxidation-reduction process	BP	AN6525 | AN2621 | AN3741 | AN0554 | AN10233 | AN5440 | AN3380 | AN1897 | AN2622 | AN7388 | AN8168 | AN1733 | AN7824 | AN7823 | AN7821 | AN7818 | AN7815 | AN7814 | AN11013 | AN7811 | AN7810 | AN7808 | AN7806 | AN7805 | AN7804 | AN9064	5.80825e-05	0.00227578	26 / 72	26 / 2370
GO:0004553	hydrolase activity, hydrolyzing O-glycosyl compounds	MF	AN2534 | AN8007 | AN7345 | AN7152 | AN9286 | AN4102 | AN0712 | AN10482 | AN5976 | AN3903 | AN2828 | AN7396 | AN5282 | AN4871 | AN5214 | AN4052 | AN3777 | AN3297 | AN9276 | AN1742 | AN3613	0.000133535	0.00479613	21 / 55	21 / 2370
GO:1900815	monodictyphenone biosynthetic process	BP	AN7820 | AN10074 | AN7825 | AN7810 | AN7807 | AN7806	0.000162372	0.00538325	6 / 7	6 / 2370
GO:0045493	xylan catabolic process	BP	AN2534 | AN8007 | AN9286 | AN0388 | AN6093 | AN2632 | AN7908 | AN1772 | AN5267 | AN3613	0.000257239	0.00791928	10 / 18	10 / 2370
GO:0071555	cell wall organization	BP	AN7345 | AN8006 | AN4052 | AN3777 | AN4372 | AN6656 | AN8761 | AN9045 | AN8891 | AN7646 | AN3337 | AN6106 | AN6748 | AN7135 | AN6395 | AN8803 | AN3389	0.000276284	0.00793856	17 / 42	17 / 2370
GO:0052689	carboxylic ester hydrolase activity	MF	AN5558 | AN5309 | AN7180 | AN6093 | AN1772 | AN5267 | AN7816	0.000342518	0.00922658	7 / 10	7 / 2370
GO:0004650	polygalacturonase activity	MF	AN4372 | AN6656 | AN8761 | AN9045 | AN8891 | AN3389	0.000555334	0.0140793	6 / 8	6 / 2370
GO:0045490	pectin catabolic process	BP	AN8007 | AN7908 | AN4372 | AN6656 | AN8761 | AN9045 | AN8891 | AN7646 | AN3337 | AN7135 | AN6395	0.00107109	0.0256468	11 / 24	11 / 2370
KEGG pathway ID	KEGG pathway name	KEGG main category	Gene ID(s)	Exact p-value	Adjusted p-value	# genes / category	# genes / input
1100	Metabolic pathways	Metabolism	AN0024.2 | AN0034.2 | AN0554.2 | AN0567.2 | AN0593.2 | AN0609.2 | AN0613.2 | AN0654.2 | AN0664.2 | AN0712.2 | AN0787.2 | AN0875.2 | AN0942.2 | AN1136.2 | AN1140.2 | AN1502.2 | AN1673.2 | AN1713.2 | AN1715.2 | AN1726.2 | AN1733.2 | AN1823.2 | AN1857.2 | AN1858.2 | AN1891.2 | AN1895.2 | AN1897.2 | AN1899.2 | AN1969.2 | AN2133.2 | AN2248.2 | AN2334.2 | AN2407.2 | AN2497.2 | AN2621.2 | AN2622.2 | AN2…	7.915663e-9	5.578334e-7	120 / 680	120 / 2370
280	Valine, leucine and isoleucine degradation	Metabolism	AN0554.2 | AN0593.2 | AN1726.2 | AN2248.2 | AN3591.2 | AN3639.2 | AN4687.2 | AN4688.2 | AN4690.2 | AN5273.2 | AN5646.2 | AN5669.2 | AN5916.2 | AN8559.2 | AN9394.2	1.267803e-8	5.578334e-7	15 / 25	15 / 2370
360	Phenylalanine metabolism	Metabolism	AN1140.2 | AN1899.2 | AN2662.2 | AN2879.2 | AN3291.2 | AN3957.2 | AN5690.2 | AN6338.2 | AN7008.2 | AN7388.2 | AN7641.2 | AN8303.2 | AN8454.2	1.23197e-06	3.30278e-05	13 / 25	13 / 2370
380	Tryptophan metabolism	Metabolism	AN0554.2 | AN1857.2 | AN1858.2 | AN2662.2 | AN2706.2 | AN2879.2 | AN3291.2 | AN3957.2 | AN5916.2 | AN5918.2 | AN6338.2 | AN7388.2 | AN8303.2 | AN9108.2	1.50126e-06	3.30278e-05	14 / 29	14 / 2370
650	Butanoate metabolism	Metabolism	AN1482.2 | AN2248.2 | AN5273.2 | AN5669.2 | AN5852.2 | AN5887.2 | AN5916.2 | AN7008.2 | AN7315.2 | AN9394.2	1.99369e-05	0.000350889	10 / 19	10 / 2370
410	beta-Alanine metabolism	Metabolism	AN0554.2 | AN1823.2 | AN2248.2 | AN3591.2 | AN5690.2 | AN5916.2 | AN6658.2 | AN7641.2 | AN8418.2 | AN8454.2	6.09399e-05	0.000871029	10 / 21	10 / 2370
254	Aflatoxin biosynthesis	Metabolism	AN7812.2 | AN7816.2 | AN7817.2 | AN7818.2 | AN7821.2 | AN7825.2	6.92864e-05	0.000871029	6 / 8	6 / 2370
500	Starch and sucrose metabolism	Metabolism	AN0712.2 | AN2828.2 | AN3402.2 | AN3837.2 | AN4052.2 | AN4255.2 | AN4372.2 | AN5214.2 | AN5361.2 | AN5976.2 | AN6656.2 | AN7345.2 | AN7396.2 | AN7864.2 | AN8891.2	0.000186394	0.00205033	15 / 46	15 / 2370
40	Pentose and glucuronate interconversions	Metabolism	AN0554.2 | AN0942.2 | AN2860.2 | AN4372.2 | AN4829.2 | AN5361.2 | AN6656.2 | AN7646.2 | AN8891.2 | AN9064.2	0.000362263	0.00324533	10 / 25	10 / 2370
350	Tyrosine metabolism	Metabolism	AN0024.2 | AN1140.2 | AN1895.2 | AN1897.2 | AN1899.2 | AN3291.2 | AN5690.2 | AN6338.2 | AN7315.2 | AN7641.2 | AN8108.2 | AN8454.2	0.000368788	0.00324533	12 / 34	12 / 2370
1220	Degradation of aromatic compounds	Metabolism	AN0024.2 | AN2653.2 | AN2860.2 | AN5310.2 | AN7684.2 | AN8131.2 | AN8349.2 | AN8977.2 | AN9161.2	0.000594679	0.00475743	9 / 22	9 / 2370
1110	Biosynthesis of secondary metabolites	Metabolism	AN0024.2 | AN0554.2 | AN0654.2 | AN0712.2 | AN0824.2 | AN1136.2 | AN1428.2 | AN1502.2 | AN1673.2 | AN1715.2 | AN1726.2 | AN1891.2 | AN2334.2 | AN2407.2 | AN2541.2 | AN2621.2 | AN2622.2 | AN2623.2 | AN2723.2 | AN2828.2 | AN2860.2 | AN2901.2 | AN3291.2 | AN3639.2 | AN3862.2 | AN4255.2 | AN4871.2 | AN4957.2 | AN5138.2 | AN5273.2 | AN5454.2 | AN5626.2 | AN5646.2 | AN5690.2 | AN5852.2 | AN5916.2 | AN5…	0.000853166	0.00607158	51 / 281	51 / 2370
330	Arginine and proline metabolism	Metabolism	AN0554.2 | AN1733.2 | AN2662.2 | AN2879.2 | AN2901.2 | AN3291.2 | AN3957.2 | AN6022.2 | AN6025.2 | AN6658.2 | AN7451.2 | AN7669.2 | AN8303.2	0.000896938	0.00607158	13 / 42	13 / 2370
561	Glycerolipid metabolism	Metabolism	AN0034.2 | AN0554.2 | AN1713.2 | AN2860.2 | AN3916.2 | AN5919.2 | AN6530.2 | AN6943.2	0.000970169	0.00609821	8 / 19	8 / 2370
4146	Peroxisome	Cellular Processes	AN0609.2 | AN0785.2 | AN1014.2 | AN1059.2 | AN2529.2 | AN4056.2 | AN4353.2 | AN5273.2 | AN5918.2 | AN8280.2 | AN9178.2 | AN9522.2	0.0019235	0.0112845	12 / 40	12 / 2370
460	Cyanoamino acid metabolism	Metabolism	AN0712.2 | AN1891.2 | AN2828.2 | AN4577.2 | AN5976.2 | AN7396.2	0.00249538	0.0136535	6 / 13	6 / 2370
511	Other glycan degradation	Metabolism	AN1502.2 | AN1742.2 | AN3201.2 | AN6388.2	0.00263761	0.0136535	4 / 6	4 / 2370
71	Fatty acid degradation	Metabolism	AN0024.2 | AN0554.2 | AN0609.2 | AN2706.2 | AN5646.2 | AN5916.2 | AN8280.2	0.00351888	0.0172034	7 / 18	7 / 2370
53	Ascorbate and aldarate metabolism	Metabolism	AN0554.2 | AN0613.2 | AN8977.2	0.00650554	0.0301309	3 / 4	3 / 2370
640	Propanoate metabolism	Metabolism	AN2248.2 | AN3591.2 | AN5626.2 | AN5833.2 | AN5916.2 | AN8899.2	0.00848926	0.0373528	6 / 16	6 / 2370
565	Ether lipid metabolism	Metabolism	AN1713.2 | AN4778.2 | AN6530.2 | AN7691.2 | AN8546.2	0.00986408	0.0413352	5 / 12	5 / 2370
downregulated genes
FunCat ID	FunCat description	FunCat main category	Gene ID(s)	Exact p-value	Adjusted p-value	# genes / category	# genes / input
12.01.01	ribosomal proteins	Protein synthesis	ANIA_00123 | ANIA_00142 | ANIA_00262 | ANIA_00421 | ANIA_00433 | ANIA_00445 | ANIA_00465 | ANIA_00470 | ANIA_00745 | ANIA_00776 | ANIA_00843 | ANIA_01013 | ANIA_01095 | ANIA_01122 | ANIA_01166 | ANIA_01200 | ANIA_01228 | ANIA_01348 | ANIA_01770 | ANIA_01954 | ANIA_01964 | ANIA_02057 | ANIA_02147 | ANIA_02268 | ANIA_02275 | ANIA_02734 | ANIA_02906 | ANIA_02980 | ANIA_03172 | ANIA_03413 | ANIA_0363…	2.157014e-29	1.102234e-26	96 / 165	96 / 1960
02.13.03	aerobic respiration	Energy	ANIA_00252 | ANIA_00357 | ANIA_00395 | ANIA_00432 | ANIA_00747 | ANIA_01063 | ANIA_01094 | ANIA_01104 | ANIA_01444 | ANIA_01523 | ANIA_01624 | ANIA_01722 | ANIA_01743 | ANIA_01915 | ANIA_01954 | ANIA_02052 | ANIA_02099 | ANIA_02260 | ANIA_02306 | ANIA_02315 | ANIA_02316 | ANIA_02414 | ANIA_03011 | ANIA_03034 | ANIA_03738 | ANIA_04064 | ANIA_04388 | ANIA_04402 | ANIA_04525 | ANIA_04977 | ANIA_0549…	3.264286e-20	8.340252e-18	58 / 93	58 / 1960
12.04	translation	Protein synthesis	ANIA_00057 | ANIA_00142 | ANIA_00262 | ANIA_00421 | ANIA_00445 | ANIA_00465 | ANIA_00776 | ANIA_00843 | ANIA_00936 | ANIA_01013 | ANIA_01084 | ANIA_01095 | ANIA_01122 | ANIA_01166 | ANIA_01228 | ANIA_01964 | ANIA_02057 | ANIA_02065 | ANIA_02238 | ANIA_02275 | ANIA_02734 | ANIA_02932 | ANIA_02980 | ANIA_03172 | ANIA_03413 | ANIA_03706 | ANIA_03865 | ANIA_04060 | ANIA_04073 | ANIA_04087 | ANIA_0416…	7.956719e-13	1.355294e-10	74 / 175	74 / 1960
42.16	mitochondrion	Biogenesis of cellular components	ANIA_00123 | ANIA_00142 | ANIA_00470 | ANIA_00559 | ANIA_00726 | ANIA_00894 | ANIA_01094 | ANIA_01095 | ANIA_01348 | ANIA_01770 | ANIA_01826 | ANIA_01954 | ANIA_02057 | ANIA_02268 | ANIA_02432 | ANIA_02590 | ANIA_02939 | ANIA_03027 | ANIA_03461 | ANIA_03649 | ANIA_03744 | ANIA_04126 | ANIA_04251 | ANIA_04308 | ANIA_04402 | ANIA_04424 | ANIA_04434 | ANIA_04611 | ANIA_04613 | ANIA_04633 | ANIA_0473…	4.508845e-11	5.760049e-9	65 / 156	65 / 1960
2.11	electron transport and membrane-associated energy conservation	Energy	ANIA_00252 | ANIA_00330 | ANIA_00357 | ANIA_00432 | ANIA_00747 | ANIA_00943 | ANIA_01063 | ANIA_01094 | ANIA_01444 | ANIA_01523 | ANIA_01534 | ANIA_01624 | ANIA_02306 | ANIA_02315 | ANIA_02316 | ANIA_02414 | ANIA_02590 | ANIA_02682 | ANIA_04126 | ANIA_04388 | ANIA_04424 | ANIA_04525 | ANIA_04859 | ANIA_05228 | ANIA_05629 | ANIA_05703 | ANIA_05704 | ANIA_05971 | ANIA_06077 | ANIA_06167 | ANIA_0625…	7.677231e-11	7.84613e-9	52 / 114	52 / 1960
12.01	ribosome biogenesis	Protein synthesis	ANIA_00142 | ANIA_00262 | ANIA_00445 | ANIA_00465 | ANIA_00475 | ANIA_00641 | ANIA_00776 | ANIA_00843 | ANIA_01013 | ANIA_01122 | ANIA_01200 | ANIA_01228 | ANIA_01348 | ANIA_01964 | ANIA_02057 | ANIA_02268 | ANIA_02275 | ANIA_02734 | ANIA_02980 | ANIA_03172 | ANIA_03413 | ANIA_03706 | ANIA_03827 | ANIA_04043 | ANIA_04060 | ANIA_04087 | ANIA_04163 | ANIA_04202 | ANIA_04222 | ANIA_04469 | ANIA_0447…	3.512092e-10	2.991132e-8	68 / 173	68 / 1960
2.13	respiration	Energy	ANIA_00252 | ANIA_00357 | ANIA_00432 | ANIA_00726 | ANIA_00943 | ANIA_01094 | ANIA_01523 | ANIA_01534 | ANIA_01624 | ANIA_01915 | ANIA_02099 | ANIA_02299 | ANIA_02306 | ANIA_02315 | ANIA_02590 | ANIA_03843 | ANIA_03922 | ANIA_04126 | ANIA_04424 | ANIA_04525 | ANIA_04557 | ANIA_04863 | ANIA_04888 | ANIA_04977 | ANIA_05971 | ANIA_06287 | ANIA_06366 | ANIA_06386 | ANIA_06572 | ANIA_06772 | ANIA_0714…	6.385952e-8	4.66175e-06	40 / 92	40 / 1960
20.01.15	electron transport	Cellular transport, transport facilitation and transport routes	ANIA_00158 | ANIA_00170 | ANIA_00252 | ANIA_00330 | ANIA_00357 | ANIA_00432 | ANIA_00595 | ANIA_00747 | ANIA_00836 | ANIA_00943 | ANIA_01003 | ANIA_01006 | ANIA_01063 | ANIA_01094 | ANIA_01104 | ANIA_01429 | ANIA_01510 | ANIA_01523 | ANIA_01534 | ANIA_01624 | ANIA_01748 | ANIA_01752 | ANIA_01825 | ANIA_02042 | ANIA_02260 | ANIA_02306 | ANIA_02315 | ANIA_02316 | ANIA_02414 | ANIA_02590 | ANIA_0259…	2.26155e-06	0.000144457	97 / 329	97 / 1960
02.11.05	accessory proteins of electron transport and membrane-associated energy conservation	Energy	ANIA_00357 | ANIA_00747 | ANIA_01063 | ANIA_01104 | ANIA_01722 | ANIA_02260 | ANIA_02306 | ANIA_02414 | ANIA_04388 | ANIA_04977 | ANIA_05629 | ANIA_05703 | ANIA_06077 | ANIA_06255 | ANIA_06272 | ANIA_06557 | ANIA_08049 | ANIA_08118 | ANIA_08273 | ANIA_08763 | ANIA_10229 | ANIA_10553	3.72361e-06	0.000211418	22 / 44	22 / 1960
20.09.04	mitochondrial transport	Cellular transport, transport facilitation and transport routes	ANIA_00252 | ANIA_00559 | ANIA_00870 | ANIA_01163 | ANIA_01281 | ANIA_01523 | ANIA_01534 | ANIA_01795 | ANIA_02052 | ANIA_02201 | ANIA_02315 | ANIA_02646 | ANIA_02731 | ANIA_02939 | ANIA_03461 | ANIA_03663 | ANIA_03961 | ANIA_04064 | ANIA_04402 | ANIA_04557 | ANIA_04842 | ANIA_05129 | ANIA_05132 | ANIA_06010 | ANIA_06087 | ANIA_06089 | ANIA_06248 | ANIA_06254 | ANIA_06263 | ANIA_06287 | ANIA_0630…	1.24905e-05	0.000638264	41 / 113	41 / 1960
01.07.01	biosynthesis of vitamins, cofactors, and prosthetic groups	Metabolism	ANIA_00836 | ANIA_00856 | ANIA_01102 | ANIA_01263 | ANIA_01722 | ANIA_01743 | ANIA_01767 | ANIA_01778 | ANIA_01915 | ANIA_01999 | ANIA_02284 | ANIA_02435 | ANIA_02436 | ANIA_02733 | ANIA_02964 | ANIA_03031 | ANIA_03150 | ANIA_03431 | ANIA_03586 | ANIA_03920 | ANIA_04126 | ANIA_04757 | ANIA_04774 | ANIA_04841 | ANIA_04888 | ANIA_05130 | ANIA_05200 | ANIA_05435 | ANIA_05497 | ANIA_05586 | ANIA_0614…	2.71889e-05	0.00117462	51 / 155	51 / 1960
16.21.08	Fe/S binding	Protein with binding function or cofactor requirement (structural or analytic)	ANIA_00747 | ANIA_01007 | ANIA_01063 | ANIA_01104 | ANIA_02306 | ANIA_02414 | ANIA_03894 | ANIA_04388 | ANIA_04977 | ANIA_05629 | ANIA_05703 | ANIA_06077 | ANIA_06557 | ANIA_07752 | ANIA_08049 | ANIA_08273 | ANIA_08763 | ANIA_09093 | ANIA_10229	2.7584e-05	0.00117462	19 / 39	19 / 1960
16.21.07	NAD/NADP binding	Protein with binding function or cofactor requirement (structural or analytic)	ANIA_00052 | ANIA_00158 | ANIA_00595 | ANIA_00628 | ANIA_00708 | ANIA_00774 | ANIA_01003 | ANIA_01006 | ANIA_01063 | ANIA_01137 | ANIA_01263 | ANIA_01274 | ANIA_01429 | ANIA_01593 | ANIA_01752 | ANIA_02042 | ANIA_02414 | ANIA_02704 | ANIA_02951 | ANIA_03581 | ANIA_03920 | ANIA_03954 | ANIA_04094 | ANIA_04126 | ANIA_04336 | ANIA_04376 | ANIA_04727 | ANIA_05200 | ANIA_05206 | ANIA_05338 | ANIA_0543…	4.25892e-05	0.00167408	63 / 206	63 / 1960
1.02	nitrogen, sulfur and selenium metabolism	Metabolism	ANIA_00215 | ANIA_00232 | ANIA_00366 | ANIA_00399 | ANIA_00565 | ANIA_01006 | ANIA_01007 | ANIA_01008 | ANIA_01150 | ANIA_01194 | ANIA_01752 | ANIA_01769 | ANIA_01825 | ANIA_01883 | ANIA_01923 | ANIA_01993 | ANIA_02197 | ANIA_02287 | ANIA_02944 | ANIA_03027 | ANIA_03239 | ANIA_03275 | ANIA_03281 | ANIA_03581 | ANIA_04111 | ANIA_04120 | ANIA_04159 | ANIA_04376 | ANIA_04401 | ANIA_04655 | ANIA_0476…	5.48878e-05	0.00183423	58 / 187	58 / 1960
01.02.03.01	sulfate assimilation	Metabolism	ANIA_01194 | ANIA_01752 | ANIA_01769 | ANIA_04769 | ANIA_04770 | ANIA_04774 | ANIA_07034 | ANIA_07600	5.53175e-05	0.00183423	8 / 10	8 / 1960
1.01	amino acid metabolism	Metabolism	ANIA_00009 | ANIA_00016 | ANIA_00354 | ANIA_00628 | ANIA_00688 | ANIA_00797 | ANIA_00840 | ANIA_01007 | ANIA_01103 | ANIA_01150 | ANIA_01222 | ANIA_01263 | ANIA_01631 | ANIA_01883 | ANIA_01923 | ANIA_01993 | ANIA_02526 | ANIA_02531 | ANIA_02882 | ANIA_03031 | ANIA_03058 | ANIA_03396 | ANIA_03641 | ANIA_04401 | ANIA_04430 | ANIA_04443 | ANIA_04769 | ANIA_04770 | ANIA_04888 | ANIA_04956 | ANIA_0517…	5.74318e-05	0.00183423	64 / 212	64 / 1960
2.01	glycolysis and gluconeogenesis	Energy	ANIA_00628 | ANIA_00688 | ANIA_00887 | ANIA_01246 | ANIA_01918 | ANIA_02286 | ANIA_02867 | ANIA_02875 | ANIA_02951 | ANIA_02964 | ANIA_02981 | ANIA_03059 | ANIA_03223 | ANIA_04727 | ANIA_05144 | ANIA_05162 | ANIA_05210 | ANIA_05355 | ANIA_05604 | ANIA_05746 | ANIA_05843 | ANIA_05908 | ANIA_06708 | ANIA_06900 | ANIA_07459 | ANIA_08041 | ANIA_08979 | ANIA_09148 | ANIA_09403 | ANIA_10656 | ANIA_1066…	8.16975e-05	0.00245573	32 / 87	32 / 1960
16.21.05	FAD/FMN binding	Protein with binding function or cofactor requirement (structural or analytic)	ANIA_00432 | ANIA_00595 | ANIA_00836 | ANIA_01006 | ANIA_01007 | ANIA_01063 | ANIA_01310 | ANIA_01429 | ANIA_01752 | ANIA_02042 | ANIA_02414 | ANIA_02574 | ANIA_02682 | ANIA_02704 | ANIA_03586 | ANIA_03920 | ANIA_04120 | ANIA_04363 | ANIA_04977 | ANIA_05200 | ANIA_05228 | ANIA_05258 | ANIA_05276 | ANIA_05338 | ANIA_05629 | ANIA_05703 | ANIA_05838 | ANIA_05846 | ANIA_06077 | ANIA_06366 | ANIA_0638…	0.000148616	0.00421906	45 / 140	45 / 1960
01.20.19.01	metabolism of porphyrins	Metabolism	ANIA_01722 | ANIA_01915 | ANIA_02284 | ANIA_02733 | ANIA_03920 | ANIA_04415 | ANIA_04774 | ANIA_05130 | ANIA_05132 | ANIA_06645 | ANIA_06659 | ANIA_07752 | ANIA_10913	0.000377647	0.00981807	13 / 26	13 / 1960
01.01.11.04.01	biosynthesis of leucine	Metabolism	ANIA_00840 | ANIA_00912 | ANIA_02526 | ANIA_04430 | ANIA_04744 | ANIA_05206 | ANIA_05886 | ANIA_05957 | ANIA_06346 | ANIA_06521 | ANIA_07876 | ANIA_07878	0.000384269	0.00981807	12 / 23	12 / 1960
01.01.11.02.01	biosynthesis of isoleucine	Metabolism	ANIA_02526 | ANIA_03830 | ANIA_04430 | ANIA_04956 | ANIA_05206 | ANIA_05957 | ANIA_06346 | ANIA_07358 | ANIA_07876 | ANIA_07878 | ANIA_09080	0.000647528	0.0157565	11 / 21	11 / 1960
32.01.05	heat shock response	Cell rescue, defense and virulence	ANIA_00858 | ANIA_02432 | ANIA_02530 | ANIA_02731 | ANIA_03555 | ANIA_04583 | ANIA_04616 | ANIA_04674 | ANIA_05129 | ANIA_05781 | ANIA_06010 | ANIA_06089 | ANIA_06193 | ANIA_07143 | ANIA_07892 | ANIA_08269 | ANIA_10507	0.000800454	0.0185924	17 / 41	17 / 1960
01.06.06.11	tetracyclic and pentacyclic triterpenes (cholesterin, steroids and hopanoids) metabolism	Metabolism	ANIA_00432 | ANIA_00451 | ANIA_00595 | ANIA_00640 | ANIA_01006 | ANIA_01593 | ANIA_01614 | ANIA_01901 | ANIA_02119 | ANIA_02311 | ANIA_03226 | ANIA_03638 | ANIA_04042 | ANIA_04094 | ANIA_04117 | ANIA_04923 | ANIA_05368 | ANIA_05563 | ANIA_05585 | ANIA_05838 | ANIA_06386 | ANIA_06506 | ANIA_06973 | ANIA_07146 | ANIA_07211 | ANIA_07661 | ANIA_08012 | ANIA_08283 | ANIA_08398 | ANIA_08896 | ANIA_0890…	0.000963615	0.021409	35 / 110	35 / 1960
02.45.15	energy generation (e.g. ATP synthase)	Energy	ANIA_00252 | ANIA_00357 | ANIA_00943 | ANIA_01523 | ANIA_01534 | ANIA_01624 | ANIA_02315 | ANIA_06287 | ANIA_10032 | ANIA_10626 | ANIA_11303	0.00107279	0.0228416	11 / 22	11 / 1960
20.01.01.01.01	heavy metal ion transport (Cu+, Fe3+, etc.)	Cellular transport, transport facilitation and transport routes	ANIA_00241 | ANIA_00773 | ANIA_01795 | ANIA_01833 | ANIA_02934 | ANIA_03117 | ANIA_03208 | ANIA_03209 | ANIA_03799 | ANIA_03961 | ANIA_04842 | ANIA_04863 | ANIA_05132 | ANIA_06087 | ANIA_06115 | ANIA_06845 | ANIA_07662 | ANIA_08337 | ANIA_10237	0.00142553	0.0291379	19 / 50	19 / 1960
01.05.02.01	nucleotide-sugar metabolism	Metabolism	ANIA_02951 | ANIA_02981 | ANIA_04727 | ANIA_05586 | ANIA_08032 | ANIA_09148 | ANIA_09172	0.00149077	0.0292994	7 / 11	7 / 1960
01.05.02.07	sugar, glucoside, polyol and carboxylate catabolism	Metabolism	ANIA_00240 | ANIA_00688 | ANIA_01003 | ANIA_01246 | ANIA_01274 | ANIA_01551 | ANIA_01568 | ANIA_02295 | ANIA_02314 | ANIA_02867 | ANIA_02875 | ANIA_02981 | ANIA_03044 | ANIA_03223 | ANIA_03307 | ANIA_03308 | ANIA_03336 | ANIA_03368 | ANIA_03466 | ANIA_03679 | ANIA_03894 | ANIA_04336 | ANIA_04727 | ANIA_04852 | ANIA_05144 | ANIA_05206 | ANIA_05210 | ANIA_05463 | ANIA_05547 | ANIA_05563 | ANIA_0558…	0.00218494	0.041352	63 / 235	63 / 1960
32.05	disease, virulence and defense	Cell rescue, defense and virulence	ANIA_00011 | ANIA_00857 | ANIA_02575 | ANIA_02587 | ANIA_02649 | ANIA_02683 | ANIA_03395 | ANIA_03396 | ANIA_03687 | ANIA_04642 | ANIA_04769 | ANIA_05318 | ANIA_05610 | ANIA_05943 | ANIA_07232 | ANIA_07400 | ANIA_07523 | ANIA_07774 | ANIA_08080 | ANIA_08099 | ANIA_08504 | ANIA_08548 | ANIA_08943 | ANIA_08971 | ANIA_10079 | ANIA_10357	0.00246254	0.0449413	26 / 79	26 / 1960
20.01.11	amine / polyamine transport	Cellular transport, transport facilitation and transport routes	ANIA_00332 | ANIA_00418 | ANIA_00856 | ANIA_01061 | ANIA_02287 | ANIA_02822 | ANIA_02962 | ANIA_03352 | ANIA_04119 | ANIA_04313 | ANIA_05329 | ANIA_05540 | ANIA_06019 | ANIA_06774 | ANIA_07295 | ANIA_07392 | ANIA_08122 | ANIA_08726 | ANIA_08966 | ANIA_08990 | ANIA_10905 | ANIA_11211	0.00281206	0.0495504	22 / 64	22 / 1960
32.01.01	oxidative stress response	Cell rescue, defense and virulence	ANIA_00170 | ANIA_00241 | ANIA_00432 | ANIA_00726 | ANIA_00836 | ANIA_01986 | ANIA_02530 | ANIA_02823 | ANIA_03214 | ANIA_03247 | ANIA_03555 | ANIA_03581 | ANIA_03687 | ANIA_03973 | ANIA_04329 | ANIA_05781 | ANIA_06386 | ANIA_06697 | ANIA_07567 | ANIA_07892 | ANIA_08080 | ANIA_08637 | ANIA_08892 | ANIA_09339 | ANIA_10220 | ANIA_10223 | ANIA_10507 | ANIA_11032	0.00299293	0.049842	28 / 88	28 / 1960
01.01.11.03.01	biosynthesis of valine	Metabolism	ANIA_02526 | ANIA_04430 | ANIA_04956 | ANIA_05206 | ANIA_05957 | ANIA_06346 | ANIA_07358 | ANIA_07876 | ANIA_07878	0.00308657	0.049842	9 / 18	9 / 1960
16.21.17	pyridoxal phosphate binding	Protein with binding function or cofactor requirement (structural or analytic)	ANIA_01923 | ANIA_01993 | ANIA_02284 | ANIA_03830 | ANIA_04156 | ANIA_05444 | ANIA_05591 | ANIA_06048 | ANIA_06231 | ANIA_06644 | ANIA_06645 | ANIA_06648 | ANIA_07051 | ANIA_07656 | ANIA_07876 | ANIA_07878 | ANIA_07989 | ANIA_08277 | ANIA_10299	0.00312122	0.049842	19 / 53	19 / 1960
GO ID	GO name	GO namespace	Gene ID(s)	Exact p-value	Adjusted p-value	# genes / category	# genes / input
GO:0005739	mitochondrion	CC	AN3894 | AN5122 | AN10466 | AN2099 | AN10778 | AN3663 | AN6010 | AN9400 | AN5867 | AN10923 | AN1624 | AN5200 | AN6366 | AN10220 | AN8275 | AN4757 | AN1722 | AN6246 | AN3853 | AN10315 | AN2284 | AN6089 | AN7459 | AN6521 | AN0432 | AN2055 | AN2223 | AN3843 | AN5897 | AN7722 | AN6193 | AN3831 | AN4434 | AN6306	4.21333e-7	0.000273024	34 / 73	34 / 1960
GO:0006950	response to stress	BP	AN0641 | AN0656 | AN1769 | AN2204 | AN2882 | AN6010 | AN7484 | AN7895 | AN6246 | AN5746 | AN8041 | AN2530 | AN6089 | AN5129 | AN2968	1.204e-05	0.00390097	15 / 24	15 / 1960
GO:0006096	glycolytic process	BP	AN1918 | AN5746 | AN8041 | AN7459 | AN0887 | AN1246 | AN5210 | AN6900	2.98025e-05	0.00643734	8 / 9	8 / 1960
GO:0008652	cellular amino acid biosynthetic process	BP	AN2882 | AN5867 | AN0708 | AN2243 | AN8057 | AN8277 | AN7430 | AN6521 | AN4769 | AN7722 | AN4770 | AN1194	0.000174042	0.0281948	12 / 20	12 / 1960
GO:0005622	intracellular	CC	AN10220 | AN7895 | AN4583 | AN8057 | AN5746 | AN4376 | AN8041 | AN2981 | AN10315 | AN5129 | AN2968 | AN6521 | AN2223 | AN4888 | AN1246 | AN2867 | AN5210 | AN2687 | AN3172 | AN4060	0.000326355	0.0303555	20 / 45	20 / 1960
GO:0097308	cellular response to farnesol	BP	AN8979 | AN4259 | AN3853 | AN5746 | AN4376 | AN4159 | AN4695 | AN2530 | AN5129 | AN6521 | AN0565 | AN6900	0.000330225	0.0303555	12 / 21	12 / 1960
GO:0006094	gluconeogenesis	BP	AN1918 | AN5746 | AN8041 | AN7459 | AN0887 | AN1246 | AN5210 | AN6900	0.000364092	0.0303555	8 / 11	8 / 1960
GO:0071470	cellular response to osmotic stress	BP	AN0641 | AN0656 | AN1769 | AN2204 | AN2882 | AN6010 | AN7484 | AN7895 | AN5746 | AN8041 | AN6089 | AN5129 | AN2968	0.000374759	0.0303555	13 / 24	13 / 1960
GO:0019344	cysteine biosynthetic process	BP	AN8057 | AN8277 | AN4769 | AN4770 | AN1194	0.000442881	0.0315201	5 / 5	5 / 1960
GO:0006534	cysteine metabolic process	BP	AN1769 | AN8057 | AN8277 | AN4769 | AN4770 | AN1194	0.000535063	0.0315201	6 / 7	6 / 1960
GO:0006807	nitrogen compound metabolic process	BP	AN4159 | AN0887 | AN0886 | AN1006 | AN1007 | AN0565	0.000535063	0.0315201	6 / 7	6 / 1960
KEGG pathway ID	KEGG pathway name	KEGG main category	Gene ID(s)	Exact p-value	Adjusted p-value	# genes / category	# genes / input
3010	Ribosome	Genetic Information Processing	AN0123.2 | AN0142.2 | AN0262.2 | AN0433.2 | AN0445.2 | AN0465.2 | AN0470.2 | AN0776.2 | AN0843.2 | AN1013.2 | AN1095.2 | AN1122.2 | AN1166.2 | AN1228.2 | AN1770.2 | AN1964.2 | AN2057.2 | AN2268.2 | AN2275.2 | AN2734.2 | AN2980.2 | AN3172.2 | AN3413.2 | AN3706.2 | AN4060.2 | AN4073.2 | AN4087.2 | AN4202.2 | AN4222.2 | AN4251.2 | AN4308.2 | AN4475.2 | AN4522.2 | AN4594.2 | AN4611.2 | AN4794.2 | AN4…	5.402904e-21	5.186788e-19	65 / 92	65 / 1960
1110	Biosynthesis of secondary metabolites	Metabolism	AN0240.2 | AN0285.2 | AN0354.2 | AN0432.2 | AN0688.2 | AN0797.2 | AN0840.2 | AN0912.2 | AN1003.2 | AN1150.2 | AN1222.2 | AN1246.2 | AN1722.2 | AN1743.2 | AN1778.2 | AN1883.2 | AN1901.2 | AN1915.2 | AN1918.2 | AN1993.2 | AN2286.2 | AN2295.2 | AN2311.2 | AN2314.2 | AN2435.2 | AN2436.2 | AN2526.2 | AN2532.2 | AN2733.2 | AN2867.2 | AN2875.2 | AN2882.2 | AN2914.2 | AN2951.2 | AN2981.2 | AN3058.2 | AN3…	1.031145e-11	4.949496e-10	118 / 281	118 / 1960
1100	Metabolic pathways	Metabolism	AN0067.2 | AN0104.2 | AN0240.2 | AN0252.2 | AN0271.2 | AN0285.2 | AN0354.2 | AN0357.2 | AN0443.2 | AN0451.2 | AN0565.2 | AN0640.2 | AN0688.2 | AN0797.2 | AN0840.2 | AN0912.2 | AN0913.2 | AN0943.2 | AN1003.2 | AN1063.2 | AN1102.2 | AN1150.2 | AN1194.2 | AN1222.2 | AN1246.2 | AN1252.2 | AN1263.2 | AN1376.2 | AN1523.2 | AN1534.2 | AN1624.2 | AN1722.2 | AN1743.2 | AN1752.2 | AN1769.2 | AN1778.2 | AN1…	4.349126e-11	1.39172e-9	229 / 680	229 / 1960
1230	Biosynthesis of amino acids	Metabolism	AN0240.2 | AN0354.2 | AN0688.2 | AN0797.2 | AN0840.2 | AN0912.2 | AN1003.2 | AN1150.2 | AN1222.2 | AN1246.2 | AN1883.2 | AN1923.2 | AN1990.2 | AN1993.2 | AN2526.2 | AN2875.2 | AN2882.2 | AN2914.2 | AN3031.2 | AN3058.2 | AN3059.2 | AN3223.2 | AN3830.2 | AN3894.2 | AN4159.2 | AN4430.2 | AN4443.2 | AN4793.2 | AN4956.2 | AN5134.2 | AN5206.2 | AN5210.2 | AN5444.2 | AN5601.2 | AN5610.2 | AN5731.2 | AN5…	4.368929e-10	1.048543e-8	58 / 112	58 / 1960
190	Oxidative phosphorylation	Metabolism	AN0252.2 | AN0357.2 | AN0943.2 | AN1063.2 | AN1523.2 | AN1534.2 | AN1624.2 | AN1722.2 | AN1915.2 | AN2306.2 | AN2315.2 | AN2316.2 | AN2414.2 | AN2968.2 | AN3922.2 | AN4388.2 | AN4525.2 | AN4859.2 | AN4863.2 | AN4927.2 | AN5597.2 | AN5629.2 | AN5704.2 | AN5971.2 | AN6077.2 | AN6255.2 | AN6287.2 | AN6557.2 | AN7500.2 | AN8049.2 | AN8118.2 | AN8273.2 | AN8763.2 | ANID_20002 | ANID_20005 | ANID_20008…	3.020721e-9	5.799785e-8	39 / 66	39 / 1960
1210	2-Oxocarboxylic acid metabolism	Metabolism	AN0840.2 | AN0912.2 | AN1003.2 | AN1150.2 | AN1923.2 | AN1990.2 | AN1993.2 | AN2526.2 | AN3894.2 | AN4430.2 | AN4793.2 | AN4956.2 | AN5206.2 | AN5867.2 | AN5886.2 | AN6048.2 | AN6346.2 | AN6521.2 | AN7358.2 | AN7722.2 | AN7876.2 | AN8275.2	9.10265e-06	0.000145643	22 / 37	22 / 1960
920	Sulfur metabolism	Metabolism	AN1194.2 | AN1752.2 | AN1769.2 | AN1825.2 | AN4769.2 | AN4770.2 | AN6246.2 | AN7600.2 | AN8057.2 | AN8277.2 | AN8346.2 | AN9191.2	1.32583e-05	0.000181828	12 / 15	12 / 1960
100	Steroid biosynthesis	Metabolism	AN0451.2 | AN1901.2 | AN4042.2 | AN4094.2 | AN5585.2 | AN6506.2 | AN7146.2 | AN7211.2 | AN8283.2 | AN8907.2	4.0501e-05	0.000486012	10 / 12	10 / 1960
1200	Carbon metabolism	Metabolism	AN0240.2 | AN0285.2 | AN0688.2 | AN1003.2 | AN1246.2 | AN1918.2 | AN1923.2 | AN1993.2 | AN2295.2 | AN2875.2 | AN2981.2 | AN3058.2 | AN3059.2 | AN3223.2 | AN3466.2 | AN3641.2 | AN3830.2 | AN3954.2 | AN5162.2 | AN5210.2 | AN5604.2 | AN5746.2 | AN5843.2 | AN5907.2 | AN5908.2 | AN6048.2 | AN6168.2 | AN6708.2 | AN6717.2 | AN6900.2 | AN6933.2 | AN7459.2 | AN8041.2 | AN8057.2 | AN8275.2 | AN8277.2 | AN8…	0.000100479	0.00107178	40 / 93	40 / 1960
10	Glycolysis / Gluconeogenesis	Metabolism	AN1246.2 | AN1918.2 | AN2286.2 | AN2867.2 | AN2875.2 | AN3059.2 | AN3223.2 | AN4888.2 | AN5162.2 | AN5210.2 | AN5604.2 | AN5746.2 | AN5908.2 | AN6708.2 | AN6900.2 | AN7459.2 | AN8041.2 | AN8689.2 | AN8979.2 | AN9403.2	0.000249749	0.00239759	20 / 38	20 / 1960
860	Porphyrin and chlorophyll metabolism	Metabolism	AN1722.2 | AN1915.2 | AN2284.2 | AN2733.2 | AN3920.2 | AN4415.2 | AN4774.2 | AN5130.2 | AN7752.2 | AN8224.2	0.000857143	0.00685714	10 / 15	10 / 1960
290	Valine, leucine and isoleucine biosynthesis	Metabolism	AN0840.2 | AN0912.2 | AN2526.2 | AN3830.2 | AN4430.2 | AN4956.2 | AN5886.2 | AN6346.2 | AN7358.2 | AN7876.2	0.000857143	0.00685714	10 / 15	10 / 1960
250	Alanine, aspartate and glutamate metabolism	Metabolism	AN0565.2 | AN1883.2 | AN1923.2 | AN1993.2 | AN2243.2 | AN2914.2 | AN4159.2 | AN4376.2 | AN4401.2 | AN5134.2 | AN5447.2 | AN5999.2 | AN6048.2 | AN7278.2 | AN8754.2	0.0012037	0.00888887	15 / 28	15 / 1960
300	Lysine biosynthesis	Metabolism	AN1990.2 | AN2882.2 | AN3894.2 | AN4793.2 | AN5206.2 | AN5601.2 | AN5610.2 | AN6521.2	0.00298718	0.0204836	8 / 12	8 / 1960
620	Pyruvate metabolism	Metabolism	AN0628.2 | AN0840.2 | AN1918.2 | AN1990.2 | AN4424.2 | AN5162.2 | AN5210.2 | AN5843.2 | AN6126.2 | AN6168.2 | AN6708.2 | AN6717.2 | AN6933.2 | AN8707.2 | AN9403.2	0.0044375	0.0284	15 / 31	15 / 1960

## Sheet: Sheet 4
Terms characteristic for glucose containing cultures.
Upregulated in	glucose containing cultures relative to all the three other cultures
FunCat ID	FunCat description	FunCat main category	Gene ID(s)	Exact p-value	Adjusted p-value	# genes / category	# genes / input
02.13.03	aerobic respiration	Energy	ANIA_00252 | ANIA_00357 | ANIA_00747 | ANIA_01523 | ANIA_01624 | ANIA_01722 | ANIA_01743 | ANIA_01915 | ANIA_02099 | ANIA_02306 | ANIA_02315 | ANIA_02316 | ANIA_03034 | ANIA_03738 | ANIA_04064 | ANIA_04388 | ANIA_04402 | ANIA_04525 | ANIA_05497 | ANIA_06255 | ANIA_06386 | ANIA_06593 | ANIA_07500 | ANIA_07752 | ANIA_08118 | ANIA_08273 | ANIA_10229 | ANIA_10585	4.011569e-10	1.540443e-7	28 / 93	28 / 918
2.11	electron transport and membrane-associated energy conservation	Energy	ANIA_00252 | ANIA_00357 | ANIA_00747 | ANIA_00943 | ANIA_01523 | ANIA_01624 | ANIA_02306 | ANIA_02315 | ANIA_02316 | ANIA_02590 | ANIA_02682 | ANIA_04126 | ANIA_04388 | ANIA_04424 | ANIA_04525 | ANIA_05228 | ANIA_06167 | ANIA_06255 | ANIA_06386 | ANIA_06753 | ANIA_07500 | ANIA_08118 | ANIA_08273 | ANIA_10229 | ANIA_10296 | ANIA_10585 | ANIA_10834 | ANIA_11347	5.938636e-8	1.14022e-05	28 / 114	28 / 918
2.13	respiration	Energy	ANIA_00252 | ANIA_00357 | ANIA_00726 | ANIA_00943 | ANIA_01523 | ANIA_01624 | ANIA_01915 | ANIA_02099 | ANIA_02306 | ANIA_02315 | ANIA_02590 | ANIA_03922 | ANIA_04126 | ANIA_04424 | ANIA_04525 | ANIA_04863 | ANIA_04888 | ANIA_06386 | ANIA_07500 | ANIA_08118 | ANIA_10296 | ANIA_10553 | ANIA_11347	6.56961e-7	8.4091e-05	23 / 92	23 / 918
20.01.15	electron transport	Cellular transport, transport facilitation and transport routes	ANIA_00170 | ANIA_00252 | ANIA_00357 | ANIA_00747 | ANIA_00943 | ANIA_01006 | ANIA_01510 | ANIA_01523 | ANIA_01624 | ANIA_01748 | ANIA_01825 | ANIA_02042 | ANIA_02306 | ANIA_02315 | ANIA_02316 | ANIA_02590 | ANIA_02682 | ANIA_02704 | ANIA_02727 | ANIA_03275 | ANIA_03394 | ANIA_03586 | ANIA_04117 | ANIA_04126 | ANIA_04388 | ANIA_04424 | ANIA_04525 | ANIA_05200 | ANIA_05206 | ANIA_05228 | ANIA_0533…	1.38309e-06	0.000132777	52 / 329	52 / 918
01.07.01	biosynthesis of vitamins, cofactors, and prosthetic groups	Metabolism	ANIA_00856 | ANIA_01102 | ANIA_01722 | ANIA_01743 | ANIA_01767 | ANIA_01778 | ANIA_01915 | ANIA_01999 | ANIA_02435 | ANIA_02436 | ANIA_02733 | ANIA_03586 | ANIA_03920 | ANIA_04126 | ANIA_04757 | ANIA_04888 | ANIA_05130 | ANIA_05200 | ANIA_05435 | ANIA_05497 | ANIA_05586 | ANIA_06644 | ANIA_06645 | ANIA_07656 | ANIA_07725 | ANIA_07752 | ANIA_09259 | ANIA_10290 | ANIA_10913	1.38225e-05	0.00106157	29 / 155	29 / 918
01.20.19.01	metabolism of porphyrins	Metabolism	ANIA_01722 | ANIA_01915 | ANIA_02733 | ANIA_03920 | ANIA_05130 | ANIA_05132 | ANIA_06645 | ANIA_06659 | ANIA_07752 | ANIA_10913	1.78451e-05	0.00114209	10 / 26	10 / 918
1.02	nitrogen, sulfur and selenium metabolism	Metabolism	ANIA_00215 | ANIA_00232 | ANIA_01006 | ANIA_01007 | ANIA_01150 | ANIA_01825 | ANIA_01923 | ANIA_01993 | ANIA_02197 | ANIA_02287 | ANIA_03027 | ANIA_03239 | ANIA_03275 | ANIA_04111 | ANIA_04120 | ANIA_05411 | ANIA_07169 | ANIA_07656 | ANIA_07881 | ANIA_08206 | ANIA_08277 | ANIA_08346 | ANIA_08451 | ANIA_08905 | ANIA_09004 | ANIA_09191 | ANIA_09470 | ANIA_10905 | ANIA_10979	0.000449382	0.0246518	29 / 187	29 / 918
02.13.01	anaerobic respiration	Energy	ANIA_01007 | ANIA_02316 | ANIA_04064 | ANIA_07169 | ANIA_11303	0.000608834	0.029224	5 / 10	5 / 918
32.05.05	virulence, disease factors	Cell rescue, defense and virulence	ANIA_00550 | ANIA_00857 | ANIA_01312 | ANIA_01607 | ANIA_02035 | ANIA_02587 | ANIA_02649 | ANIA_02683 | ANIA_02726 | ANIA_03282 | ANIA_03321 | ANIA_04852 | ANIA_06924 | ANIA_06946 | ANIA_07232 | ANIA_07523 | ANIA_08548 | ANIA_08910 | ANIA_08943 | ANIA_08984 | ANIA_10518	0.000688527	0.0293772	21 / 122	21 / 918
16.21.05	FAD/FMN binding	Protein with binding function or cofactor requirement (structural or analytic)	ANIA_01006 | ANIA_01007 | ANIA_01310 | ANIA_02042 | ANIA_02574 | ANIA_02682 | ANIA_02704 | ANIA_03586 | ANIA_03920 | ANIA_04120 | ANIA_05200 | ANIA_05228 | ANIA_05258 | ANIA_05338 | ANIA_05846 | ANIA_06386 | ANIA_07274 | ANIA_08206 | ANIA_10229 | ANIA_10290 | ANIA_10296 | ANIA_10834 | ANIA_11008	0.00076696	0.0294513	23 / 140	23 / 918
16.21.01	heme binding	Protein with binding function or cofactor requirement (structural or analytic)	ANIA_00357 | ANIA_00918 | ANIA_01006 | ANIA_01748 | ANIA_01901 | ANIA_03394 | ANIA_04117 | ANIA_04592 | ANIA_06255 | ANIA_08118 | ANIA_08411 | ANIA_08637 | ANIA_09339	0.0011331	0.0356627	13 / 62	13 / 918
01.06.06.11	tetracyclic and pentacyclic triterpenes (cholesterin, steroids and hopanoids) metabolism	Metabolism	ANIA_00451 | ANIA_00640 | ANIA_01006 | ANIA_01593 | ANIA_01901 | ANIA_02119 | ANIA_03638 | ANIA_04094 | ANIA_04117 | ANIA_04923 | ANIA_05585 | ANIA_06386 | ANIA_06506 | ANIA_06973 | ANIA_07211 | ANIA_08012 | ANIA_08896 | ANIA_08907 | ANIA_11008	0.00117164	0.0356627	19 / 110	19 / 918
02.45.15	energy generation (e.g. ATP synthase)	Energy	ANIA_00252 | ANIA_00357 | ANIA_00943 | ANIA_01523 | ANIA_01624 | ANIA_02315 | ANIA_11303	0.00126961	0.0356627	7 / 22	7 / 918
1.2	secondary metabolism	Metabolism	ANIA_00010 | ANIA_00016 | ANIA_00054 | ANIA_00274 | ANIA_00744 | ANIA_00856 | ANIA_01034 | ANIA_01061 | ANIA_01310 | ANIA_01312 | ANIA_01596 | ANIA_01597 | ANIA_01901 | ANIA_02021 | ANIA_02032 | ANIA_02033 | ANIA_02036 | ANIA_02287 | ANIA_02475 | ANIA_02559 | ANIA_02574 | ANIA_02615 | ANIA_02648 | ANIA_02675 | ANIA_02683 | ANIA_02704 | ANIA_02727 | ANIA_02959 | ANIA_03252 | ANIA_03267 | ANIA_0327…	0.0013002	0.0356627	112 / 1068	112 / 918
02.16.01	alcohol fermentation	Energy	ANIA_02286 | ANIA_02470 | ANIA_03873 | ANIA_04126 | ANIA_04888 | ANIA_05355 | ANIA_07500 | ANIA_07636 | ANIA_08336 | ANIA_10667	0.00151639	0.0370316	10 / 42	10 / 918
20.01.11	amine / polyamine transport	Cellular transport, transport facilitation and transport routes	ANIA_00332 | ANIA_00856 | ANIA_01061 | ANIA_02287 | ANIA_03352 | ANIA_04119 | ANIA_04313 | ANIA_05540 | ANIA_07392 | ANIA_08122 | ANIA_08966 | ANIA_08990 | ANIA_10905	0.00154298	0.0370316	13 / 64	13 / 918
02.11.05	accessory proteins of electron transport and membrane-associated energy conservation	Energy	ANIA_00357 | ANIA_00747 | ANIA_01722 | ANIA_02306 | ANIA_04388 | ANIA_06255 | ANIA_08118 | ANIA_08273 | ANIA_10229 | ANIA_10553	0.00220817	0.0498786	10 / 44	10 / 918
GO ID	GO name	GO namespace	Gene ID(s)	Exact p-value	Adjusted p-value	# genes / category	# genes / input
GO:0005739	mitochondrion	CC	AN3894 | AN10466 | AN2099 | AN10778 | AN6010 | AN1624 | AN5200 | AN8275 | AN4757 | AN1722 | AN6246 | AN6089 | AN2055 | AN7722 | AN3831 | AN6306	4.21083e-05	0.0130536	16 / 73	16 / 918
GO:0006096	glycolytic process	BP	AN5746 | AN8041 | AN0887 | AN1246 | AN5210	0.000235168	0.0321914	5 / 9	5 / 918
GO:0020037	heme binding	MF	AN8637 | AN9339 | AN6246 | AN1006 | AN1007 | AN1967	0.00031153	0.0321914	6 / 14	6 / 918
GO:0055114	oxidation-reduction process	BP	AN2286 | AN2099 | AN0708 | AN5200 | AN8637 | AN9339 | AN6246 | AN8041 | AN1006 | AN1007 | AN1967 | AN1137 | AN0170 | AN9470	0.000567109	0.0439509	14 / 72	14 / 918
GO:0006094	gluconeogenesis	BP	AN5746 | AN8041 | AN0887 | AN1246 | AN5210	0.00076301	0.0473066	5 / 11	5 / 918
KEGG pathway ID	KEGG pathway name	KEGG main category	Gene ID(s)	Exact p-value	Adjusted p-value	# genes / category	# genes / input
1100	Metabolic pathways	Metabolism	AN0252.2 | AN0357.2 | AN0451.2 | AN0640.2 | AN0913.2 | AN0943.2 | AN1102.2 | AN1150.2 | AN1246.2 | AN1523.2 | AN1624.2 | AN1722.2 | AN1743.2 | AN1778.2 | AN1901.2 | AN1915.2 | AN1923.2 | AN1993.2 | AN2286.2 | AN2306.2 | AN2315.2 | AN2316.2 | AN2336.2 | AN2435.2 | AN2436.2 | AN2526.2 | AN2733.2 | AN3104.2 | AN3223.2 | AN3277.2 | AN3390.2 | AN3586.2 | AN3894.2 | AN3920.2 | AN3922.2 | AN3933.2 | AN4…	1.676989e-12	1.129222e-10	99 / 680	99 / 918
190	Oxidative phosphorylation	Metabolism	AN0252.2 | AN0357.2 | AN0943.2 | AN1523.2 | AN1624.2 | AN1722.2 | AN1915.2 | AN2306.2 | AN2315.2 | AN2316.2 | AN3922.2 | AN4388.2 | AN4525.2 | AN4863.2 | AN4927.2 | AN5597.2 | AN6255.2 | AN7500.2 | AN8118.2 | AN8273.2 | ANID_20002 | ANID_20005 | ANID_20008 | ANID_20010 | ANID_20011 | ANID_20012	3.051952e-12	1.129222e-10	26 / 66	26 / 918
1110	Biosynthesis of secondary metabolites	Metabolism	AN1150.2 | AN1246.2 | AN1722.2 | AN1743.2 | AN1778.2 | AN1901.2 | AN1915.2 | AN1993.2 | AN2286.2 | AN2435.2 | AN2436.2 | AN2526.2 | AN2733.2 | AN3223.2 | AN3277.2 | AN3586.2 | AN3920.2 | AN4094.2 | AN4569.2 | AN4727.2 | AN4888.2 | AN4923.2 | AN5130.2 | AN5159.2 | AN5210.2 | AN5447.2 | AN5586.2 | AN5731.2 | AN5746.2 | AN5907.2 | AN6346.2 | AN6386.2 | AN6506.2 | AN6717.2 | AN7211.2 | AN7278.2 | AN7…	4.437573e-7	1.0946e-05	48 / 281	48 / 918
100	Steroid biosynthesis	Metabolism	AN0451.2 | AN1901.2 | AN4094.2 | AN5585.2 | AN6506.2 | AN7211.2 | AN8907.2	1.89472e-05	0.000350523	7 / 12	7 / 918
860	Porphyrin and chlorophyll metabolism	Metabolism	AN1722.2 | AN1915.2 | AN2733.2 | AN3920.2 | AN5130.2 | AN7752.2	0.00106007	0.015689	6 / 15	6 / 918
1210	2-Oxocarboxylic acid metabolism	Metabolism	AN1150.2 | AN1923.2 | AN1993.2 | AN2526.2 | AN3894.2 | AN5206.2 | AN6346.2 | AN7722.2 | AN8275.2	0.00352401	0.0434628	9 / 37	9 / 918
Downregulated in	glucose containing cultures relative to all the three other cultures
FunCat ID	FunCat description	FunCat main category	Gene ID(s)	Exact p-value	Adjusted p-value	# genes / category	# genes / input
1.2	secondary metabolism	Metabolism	ANIA_00036 | ANIA_00051 | ANIA_00147 | ANIA_00149 | ANIA_00150 | ANIA_00208 | ANIA_00338 | ANIA_00370 | ANIA_00382 | ANIA_00459 | ANIA_00501 | ANIA_00529 | ANIA_00533 | ANIA_00567 | ANIA_00586 | ANIA_00606 | ANIA_00613 | ANIA_00654 | ANIA_00675 | ANIA_00761 | ANIA_00783 | ANIA_00793 | ANIA_01071 | ANIA_01087 | ANIA_01088 | ANIA_01109 | ANIA_01129 | ANIA_01174 | ANIA_01425 | ANIA_01580 | ANIA_0161…	4.839106e-34	1.78563e-31	235 / 1068	235 / 1193
1.05	C-compound and carbohydrate metabolism	Metabolism	ANIA_00023 | ANIA_00024 | ANIA_00034 | ANIA_00036 | ANIA_00050 | ANIA_00100 | ANIA_00146 | ANIA_00180 | ANIA_00221 | ANIA_00322 | ANIA_00370 | ANIA_00501 | ANIA_00541 | ANIA_00554 | ANIA_00567 | ANIA_00574 | ANIA_00593 | ANIA_00649 | ANIA_00675 | ANIA_00712 | ANIA_00761 | ANIA_00765 | ANIA_00784 | ANIA_00788 | ANIA_00801 | ANIA_00942 | ANIA_00973 | ANIA_01139 | ANIA_01140 | ANIA_01203 | ANIA_0156…	8.150385e-16	1.503746e-13	172 / 919	172 / 1193
20.09.18.07	non-vesicular cellular import	Cellular transport, transport facilitation and transport routes	ANIA_00250 | ANIA_00382 | ANIA_00497 | ANIA_00501 | ANIA_00614 | ANIA_00811 | ANIA_01109 | ANIA_01185 | ANIA_01581 | ANIA_01681 | ANIA_02074 | ANIA_02344 | ANIA_02358 | ANIA_02372 | ANIA_02544 | ANIA_02781 | ANIA_02814 | ANIA_02869 | ANIA_03195 | ANIA_03210 | ANIA_03220 | ANIA_03221 | ANIA_03990 | ANIA_04590 | ANIA_04604 | ANIA_04621 | ANIA_04628 | ANIA_04630 | ANIA_04826 | ANIA_05551 | ANIA_0573…	1.070437e-9	1.316638e-7	59 / 248	59 / 1193
1.06	lipid, fatty acid and isoprenoid metabolism	Metabolism	ANIA_00034 | ANIA_00147 | ANIA_00180 | ANIA_00322 | ANIA_00370 | ANIA_00554 | ANIA_00666 | ANIA_00783 | ANIA_01314 | ANIA_01433 | ANIA_01580 | ANIA_01840 | ANIA_01877 | ANIA_01884 | ANIA_02002 | ANIA_02372 | ANIA_02393 | ANIA_02577 | ANIA_02602 | ANIA_02607 | ANIA_02662 | ANIA_02716 | ANIA_02813 | ANIA_02829 | ANIA_02869 | ANIA_02879 | ANIA_03037 | ANIA_03191 | ANIA_03210 | ANIA_03249 | ANIA_0325…	2.100607e-9	1.93781e-7	113 / 624	113 / 1193
20.01.23	allantoin and allantoate transport	Cellular transport, transport facilitation and transport routes	ANIA_00497 | ANIA_00614 | ANIA_00811 | ANIA_01185 | ANIA_01681 | ANIA_02344 | ANIA_03195 | ANIA_03221 | ANIA_04628 | ANIA_04826 | ANIA_06778 | ANIA_08595 | ANIA_08623 | ANIA_08814 | ANIA_08936 | ANIA_08955 | ANIA_09010 | ANIA_09336 | ANIA_09392 | ANIA_09456 | ANIA_10075 | ANIA_10487 | ANIA_11153 | ANIA_11189	3.996566e-7	2.94947e-05	24 / 75	24 / 1193
01.01.09.04.02	degradation of phenylalanine	Metabolism	ANIA_00459 | ANIA_00649 | ANIA_00801 | ANIA_01895 | ANIA_01897 | ANIA_01899 | ANIA_02674 | ANIA_04643 | ANIA_05433 | ANIA_05990 | ANIA_06101 | ANIA_06414 | ANIA_06449 | ANIA_07772 | ANIA_07824 | ANIA_10259 | ANIA_10612 | ANIA_10657 | ANIA_10950 | ANIA_11034	5.139253e-7	3.16064e-05	20 / 56	20 / 1193
01.06.05	fatty acid metabolism	Metabolism	ANIA_00146 | ANIA_00322 | ANIA_00370 | ANIA_00574 | ANIA_00784 | ANIA_01822 | ANIA_01886 | ANIA_02577 | ANIA_02716 | ANIA_03318 | ANIA_03380 | ANIA_03575 | ANIA_03862 | ANIA_03880 | ANIA_04009 | ANIA_04690 | ANIA_05287 | ANIA_05373 | ANIA_05402 | ANIA_06450 | ANIA_06649 | ANIA_06918 | ANIA_07128 | ANIA_07806 | ANIA_07814 | ANIA_07815 | ANIA_08163 | ANIA_08403 | ANIA_08415 | ANIA_08561 | ANIA_0875…	2.14279e-06	0.000112956	39 / 170	39 / 1193
01.01.09.04.01	biosynthesis of phenylalanine	Metabolism	ANIA_00459 | ANIA_00649 | ANIA_00801 | ANIA_01899 | ANIA_02674 | ANIA_04643 | ANIA_05433 | ANIA_05990 | ANIA_06101 | ANIA_06414 | ANIA_06449 | ANIA_07772 | ANIA_07824 | ANIA_10259 | ANIA_10599 | ANIA_10657 | ANIA_10950 | ANIA_11034	3.22564e-06	0.000148783	18 / 52	18 / 1193
20.09.18	cellular import	Cellular transport, transport facilitation and transport routes	ANIA_00250 | ANIA_00497 | ANIA_00614 | ANIA_00811 | ANIA_01109 | ANIA_01185 | ANIA_01581 | ANIA_01681 | ANIA_02344 | ANIA_02372 | ANIA_02591 | ANIA_02601 | ANIA_02663 | ANIA_02781 | ANIA_02814 | ANIA_02869 | ANIA_03195 | ANIA_03210 | ANIA_03221 | ANIA_03915 | ANIA_03990 | ANIA_04124 | ANIA_04277 | ANIA_04590 | ANIA_04604 | ANIA_04621 | ANIA_04628 | ANIA_05734 | ANIA_05742 | ANIA_06770 | ANIA_0677…	1.79757e-05	0.000737002	55 / 295	55 / 1193
20.01.03	C-compound and carbohydrate transport	Cellular transport, transport facilitation and transport routes	ANIA_00208 | ANIA_00250 | ANIA_00382 | ANIA_00501 | ANIA_01109 | ANIA_01839 | ANIA_01917 | ANIA_02358 | ANIA_02372 | ANIA_02544 | ANIA_02591 | ANIA_02601 | ANIA_02663 | ANIA_02814 | ANIA_02869 | ANIA_03210 | ANIA_03220 | ANIA_03658 | ANIA_03915 | ANIA_03990 | ANIA_04124 | ANIA_04277 | ANIA_04590 | ANIA_04621 | ANIA_04630 | ANIA_05059 | ANIA_05551 | ANIA_05734 | ANIA_05742 | ANIA_05917 | ANIA_0609…	2.0474e-05	0.000755492	52 / 275	52 / 1193
32.07.01	detoxification involving cytochrome P450	Cell rescue, defense and virulence	ANIA_00338 | ANIA_00459 | ANIA_01884 | ANIA_02040 | ANIA_02607 | ANIA_03256 | ANIA_03570 | ANIA_04643 | ANIA_05433 | ANIA_05665 | ANIA_06414 | ANIA_06449 | ANIA_07772 | ANIA_07808 | ANIA_07824 | ANIA_08250 | ANIA_08309 | ANIA_08437 | ANIA_08438 | ANIA_09313 | ANIA_10259 | ANIA_10573 | ANIA_10950	3.08249e-05	0.00103403	23 / 88	23 / 1193
01.06.06.05	sesquiterpenes metabolism	Metabolism	ANIA_00338 | ANIA_00606 | ANIA_02040 | ANIA_07818 | ANIA_08309 | ANIA_09313 | ANIA_10573 | ANIA_10811 | ANIA_11013	5.77826e-05	0.00177681	9 / 19	9 / 1193
01.20.35.01.01	metabolism of melanins	Metabolism	ANIA_00146 | ANIA_00784 | ANIA_06450 | ANIA_06918 | ANIA_07806 | ANIA_08435 | ANIA_10049 | ANIA_10122 | ANIA_10335	0.000231643	0.00657508	9 / 22	9 / 1193
1.07	metabolism of vitamins, cofactors, and prosthetic groups	Metabolism	ANIA_00050 | ANIA_00586 | ANIA_00765 | ANIA_00942 | ANIA_01129 | ANIA_01563 | ANIA_01611 | ANIA_01685 | ANIA_01822 | ANIA_01899 | ANIA_02250 | ANIA_02393 | ANIA_02786 | ANIA_02813 | ANIA_03249 | ANIA_04055 | ANIA_05653 | ANIA_06525 | ANIA_07128 | ANIA_07268 | ANIA_08351 | ANIA_08356 | ANIA_08585 | ANIA_08657 | ANIA_09064 | ANIA_09127 | ANIA_09178 | ANIA_10035 | ANIA_10815	0.000260857	0.00687543	29 / 139	29 / 1193
01.20.17.03	metabolism of amines	Metabolism	ANIA_00567 | ANIA_02566 | ANIA_03291 | ANIA_03960 | ANIA_05690 | ANIA_07267 | ANIA_07408 | ANIA_07641 | ANIA_07812 | ANIA_08454 | ANIA_09011 | ANIA_09178	0.000383119	0.00942472	12 / 38	12 / 1193
01.20.05.11	metabolism of polyketides	Metabolism	ANIA_00150 | ANIA_01036 | ANIA_03386 | ANIA_03887 | ANIA_06000 | ANIA_06444 | ANIA_07815 | ANIA_07825 | ANIA_07909 | ANIA_08383 | ANIA_08513 | ANIA_09005 | ANIA_10297	0.000457934	0.0105611	13 / 44	13 / 1193
01.20.36	non-ribosomal peptide synthesis	Metabolism	ANIA_00150 | ANIA_02064 | ANIA_02924 | ANIA_06444 | ANIA_07815 | ANIA_08105 | ANIA_08433 | ANIA_08513 | ANIA_09129 | ANIA_10297 | ANIA_10576	0.000529948	0.0113606	11 / 34	11 / 1193
32.05.03	defense related proteins	Cell rescue, defense and virulence	ANIA_00554 | ANIA_01433 | ANIA_01519 | ANIA_03037 | ANIA_03256 | ANIA_04643 | ANIA_04893 | ANIA_05665 | ANIA_06383 | ANIA_06389 | ANIA_06449 | ANIA_06470 | ANIA_08105 | ANIA_08250 | ANIA_08437 | ANIA_09129 | ANIA_09253	0.000579976	0.0113606	17 / 68	17 / 1193
02.16.09	mixed acid and butanediol fermentation	Energy	ANIA_02158 | ANIA_05373 | ANIA_08937 | ANIA_09288	0.000584965	0.0113606	4 / 5	4 / 1193
20.03	transport facilities	Cellular transport, transport facilitation and transport routes	ANIA_00382 | ANIA_00497 | ANIA_00501 | ANIA_00614 | ANIA_00811 | ANIA_01185 | ANIA_01681 | ANIA_01839 | ANIA_01917 | ANIA_02074 | ANIA_02344 | ANIA_02358 | ANIA_02372 | ANIA_02544 | ANIA_02591 | ANIA_02601 | ANIA_02663 | ANIA_02778 | ANIA_02869 | ANIA_03195 | ANIA_03210 | ANIA_03221 | ANIA_03658 | ANIA_03862 | ANIA_03915 | ANIA_03990 | ANIA_04019 | ANIA_04124 | ANIA_04277 | ANIA_04590 | ANIA_0460…	0.000630234	0.0116278	71 / 460	71 / 1193
01.05.02.07	sugar, glucoside, polyol and carboxylate catabolism	Metabolism	ANIA_00613 | ANIA_00675 | ANIA_00712 | ANIA_00942 | ANIA_01477 | ANIA_01870 | ANIA_01885 | ANIA_02378 | ANIA_02533 | ANIA_02534 | ANIA_02828 | ANIA_02834 | ANIA_03201 | ANIA_03297 | ANIA_03312 | ANIA_03613 | ANIA_03903 | ANIA_04691 | ANIA_04829 | ANIA_05282 | ANIA_05976 | ANIA_06383 | ANIA_06388 | ANIA_06428 | ANIA_06985 | ANIA_07275 | ANIA_07864 | ANIA_08007 | ANIA_08110 | ANIA_08477 | ANIA_0876…	0.000886097	0.01557	41 / 235	41 / 1193
01.05.03.03.07	chitin catabolism	Metabolism	ANIA_00221 | ANIA_00541 | ANIA_04871 | ANIA_05454 | ANIA_07613 | ANIA_09390	0.00127071	0.0203865	6 / 13	6 / 1193
01.05.03.03	chitin metabolism	Metabolism	ANIA_00221 | ANIA_00541 | ANIA_04871 | ANIA_05454 | ANIA_07613 | ANIA_09390	0.00127071	0.0203865	6 / 13	6 / 1193
20.01.25	vitamine/cofactor transport	Cellular transport, transport facilitation and transport routes	ANIA_00614 | ANIA_01681 | ANIA_02344 | ANIA_02663 | ANIA_03221 | ANIA_04826 | ANIA_06778 | ANIA_08502 | ANIA_08595 | ANIA_08623 | ANIA_08936 | ANIA_08955 | ANIA_09010 | ANIA_09336 | ANIA_09392 | ANIA_10075 | ANIA_10487 | ANIA_10972 | ANIA_11189	0.0014401	0.0221228	19 / 86	19 / 1193
32.05.05.01	toxins	Cell rescue, defense and virulence	ANIA_00338 | ANIA_00541 | ANIA_02040 | ANIA_07613 | ANIA_07819 | ANIA_08025 | ANIA_08309 | ANIA_08433 | ANIA_09313 | ANIA_09390 | ANIA_10573	0.00149884	0.0221228	11 / 38	11 / 1193
01.20.01.09	metabolism of aminoglycoside antibiotics	Metabolism	ANIA_00675 | ANIA_05007 | ANIA_08496 | ANIA_10226	0.00160669	0.0228026	4 / 6	4 / 1193
01.05.11.07.02	anaerobic aromate catabolism	Metabolism	ANIA_02075 | ANIA_05044 | ANIA_07418 | ANIA_08370 | ANIA_10952 | ANIA_11187	0.00202522	0.0269219	6 / 14	6 / 1193
2.25	oxidation of fatty acids	Energy	ANIA_00180 | ANIA_00370 | ANIA_01840 | ANIA_02577 | ANIA_02716 | ANIA_03880 | ANIA_04009 | ANIA_04353 | ANIA_04688 | ANIA_05287 | ANIA_05852 | ANIA_06649 | ANIA_07320 | ANIA_08415 | ANIA_09128	0.00204285	0.0269219	15 / 63	15 / 1193
16.05	polysaccharide binding	Protein with binding function or cofactor requirement (structural or analytic)	ANIA_00221 | ANIA_00541 | ANIA_03790 | ANIA_04871 | ANIA_05061 | ANIA_05454 | ANIA_06389 | ANIA_07613 | ANIA_09390	0.00390008	0.0496252	9 / 31	9 / 1193
GO ID	GO name	GO namespace	Gene ID(s)	Exact p-value	Adjusted p-value	# genes / category	# genes / input
GO:0045461	sterigmatocystin biosynthetic process	BP	AN7820 | AN0973 | AN7825 | AN7824 | AN7823 | AN7821 | AN7818 | AN7816 | AN7815 | AN7814 | AN11013 | AN7811 | AN7810 | AN7808 | AN7807 | AN7806 | AN7805 | AN7804	1.698291e-13	4.483489e-11	18 / 29	18 / 1193
GO:0019748	secondary metabolic process	BP	AN7825 | AN7824 | AN7821 | AN7818 | AN7816 | AN7815 | AN7814 | AN7811 | AN7808 | AN7807 | AN7806 | AN7805 | AN7804	2.905951e-10	3.31873e-8	13 / 20	13 / 1193
GO:0005576	extracellular region	CC	AN2534 | AN8007 | AN6525 | AN8149 | AN7152 | AN9286 | AN0554 | AN7962 | AN6093 | AN2632 | AN7908 | AN10482 | AN5976 | AN3903 | AN2828 | AN5282 | AN4871 | AN8006 | AN5267 | AN7388 | AN3297 | AN9276 | AN1742 | AN8761 | AN9045 | AN8891 | AN1685 | AN6106 | AN7135 | AN8803 | AN7807 | AN3613	3.771284e-10	3.31873e-8	32 / 127	32 / 1193
GO:0005575	cellular_component	CC	AN8007 | AN6525 | AN8149 | AN7152 | AN3741 | AN0554 | AN10233 | AN11015 | AN7962 | AN9274 | AN6093 | AN2632 | AN7908 | AN0712 | AN10482 | AN5976 | AN3903 | AN2828 | AN5282 | AN10380 | AN5267 | AN3380 | AN1897 | AN0005 | AN3297 | AN1742 | AN1414 | AN8761 | AN9045 | AN8891 | AN1685 | AN4069 | AN7135 | AN7825 | AN7824 | AN7823 | AN7821 | AN7818 | AN7816 | AN7815 | AN7814 | AN11013 | AN7811 | AN7810 …	9.839619e-10	6.494149e-8	50 / 300	50 / 1193
GO:0016491	oxidoreductase activity	MF	AN6525 | AN3741 | AN0554 | AN10233 | AN3380 | AN1897 | AN7388 | AN7824 | AN7823 | AN7821 | AN7818 | AN7815 | AN7814 | AN11013 | AN7811 | AN7810 | AN7808 | AN7806 | AN7805 | AN7804 | AN9064	5.380394e-9	2.840848e-7	21 / 63	21 / 1193
GO:0005975	carbohydrate metabolic process	BP	AN2534 | AN8007 | AN8149 | AN7152 | AN9286 | AN6093 | AN2632 | AN7908 | AN0712 | AN10482 | AN5976 | AN3903 | AN2828 | AN5282 | AN4871 | AN5267 | AN3297 | AN9276 | AN1742 | AN8761 | AN9045 | AN8891 | AN6106 | AN7135 | AN9064 | AN3613	1.964196e-8	8.642461e-7	26 / 100	26 / 1193
GO:0055114	oxidation-reduction process	BP	AN6525 | AN3741 | AN0554 | AN10233 | AN3380 | AN1897 | AN7388 | AN7824 | AN7823 | AN7821 | AN7818 | AN7815 | AN7814 | AN11013 | AN7811 | AN7810 | AN7808 | AN7806 | AN7805 | AN7804 | AN9064	8.413112e-8	3.17294e-06	21 / 72	21 / 1193
GO:0016798	hydrolase activity, acting on glycosyl bonds	MF	AN2534 | AN8007 | AN8149 | AN7152 | AN9286 | AN2632 | AN7908 | AN0712 | AN10482 | AN5976 | AN3903 | AN2828 | AN5282 | AN4871 | AN3297 | AN9276 | AN1742 | AN8761 | AN9045 | AN8891 | AN3613	1.106715e-7	3.65216e-06	21 / 73	21 / 1193
GO:0008152	metabolic process	BP	AN2534 | AN8007 | AN6525 | AN8149 | AN7152 | AN9286 | AN0554 | AN11015 | AN2632 | AN7908 | AN0712 | AN10482 | AN5976 | AN3903 | AN2828 | AN5282 | AN4871 | AN3380 | AN3297 | AN9276 | AN1742 | AN8761 | AN9045 | AN8891 | AN1685 | AN7825 | AN7821 | AN7816 | AN7815 | AN7814 | AN7806 | AN3613	1.281663e-7	3.75954e-06	32 / 156	32 / 1193
GO:0000272	polysaccharide catabolic process	BP	AN2534 | AN8007 | AN8149 | AN7152 | AN9286 | AN6093 | AN2632 | AN7908 | AN0712 | AN10482 | AN5976 | AN3903 | AN2828 | AN5282 | AN4871 | AN5267 | AN1742 | AN6106 | AN7135 | AN3613	1.26771e-06	3.34674e-05	20 / 76	20 / 1193
GO:0004553	hydrolase activity, hydrolyzing O-glycosyl compounds	MF	AN2534 | AN8007 | AN7152 | AN9286 | AN0712 | AN10482 | AN5976 | AN3903 | AN2828 | AN5282 | AN4871 | AN3297 | AN9276 | AN1742 | AN3613	2.36306e-05	0.000567134	15 / 55	15 / 1193
GO:0044550	secondary metabolite biosynthetic process	BP	AN3380 | AN7824 | AN7815 | AN7814 | AN7810 | AN7807 | AN7806	3.39296e-05	0.000746451	7 / 13	7 / 1193
GO:0045493	xylan catabolic process	BP	AN2534 | AN8007 | AN9286 | AN6093 | AN2632 | AN7908 | AN5267 | AN3613	5.15356e-05	0.00104657	8 / 18	8 / 1193
GO:0004497	monooxygenase activity	MF	AN7824 | AN7818 | AN11013 | AN7808 | AN7804	8.38708e-05	0.00147613	5 / 7	5 / 1193
GO:1900815	monodictyphenone biosynthetic process	BP	AN7820 | AN7825 | AN7810 | AN7807 | AN7806	8.38708e-05	0.00147613	5 / 7	5 / 1193
GO:0016705	oxidoreductase activity, acting on paired donors, with incorporation or reduction of molecular oxygen	MF	AN7824 | AN7818 | AN11013 | AN7808	0.000258018	0.0042573	4 / 5	4 / 1193
GO:2001307	xanthone-containing compound biosynthetic process	BP	AN7810 | AN7807 | AN7806	0.000654775	0.00960337	3 / 3	3 / 1193
GO:0047911	galacturan 1,4-alpha-galacturonidase activity	MF	AN8761 | AN9045 | AN8891	0.000654775	0.00960337	3 / 3	3 / 1193
GO:0016616	oxidoreductase activity, acting on the CH-OH group of donors, NAD or NADP as acceptor	MF	AN6525 | AN10233 | AN7821 | AN7805	0.000722617	0.0100406	4 / 6	4 / 1193
GO:0016787	hydrolase activity	MF	AN2534 | AN8007 | AN8149 | AN7152 | AN9286 | AN7962 | AN6093 | AN2632 | AN7908 | AN0712 | AN10482 | AN5976 | AN3903 | AN2828 | AN5282 | AN4871 | AN10380 | AN5267 | AN3297 | AN9276 | AN1742 | AN8761 | AN9045 | AN8891 | AN1685 | AN7816 | AN7814 | AN3613	0.000865432	0.0114237	28 / 187	28 / 1193
GO:1900560	austinol biosynthetic process	BP	AN7818 | AN7805 | AN7804	0.00245325	0.029439	3 / 4	3 / 1193
GO:1900563	dehydroaustinol biosynthetic process	BP	AN7818 | AN7805 | AN7804	0.00245325	0.029439	3 / 4	3 / 1193
GO:0019566	arabinose metabolic process	BP	AN2534 | AN8007 | AN2632 | AN7908	0.00294016	0.0337479	4 / 8	4 / 1193
GO:0020037	heme binding	MF	AN7388 | AN7824 | AN7818 | AN11013 | AN7808	0.00488485	0.0451435	5 / 14	5 / 1193
GO:0019521	D-gluconate metabolic process	BP	AN10233 | AN7388 | AN1414	0.00574609	0.0451435	3 / 5	3 / 1193
GO:0030245	cellulose catabolic process	BP	AN6093 | AN0712 | AN10482 | AN5976 | AN3903 | AN2828 | AN5282	0.00640614	0.0451435	7 / 27	7 / 1193
GO:0006631	fatty acid metabolic process	BP	AN3380 | AN7815 | AN7814 | AN7806	0.00769491	0.0451435	4 / 10	4 / 1193
KEGG pathway ID	KEGG pathway name	KEGG main category	Gene ID(s)	Exact p-value	Adjusted p-value	# genes / category	# genes / input
280	Valine, leucine and isoleucine degradation	Metabolism	AN0554.2 | AN0593.2 | AN1726.2 | AN2248.2 | AN3591.2 | AN4688.2 | AN4690.2 | AN5273.2 | AN5669.2 | AN8559.2 | AN9394.2	3.212452e-8	1.9596e-06	11 / 25	11 / 1193
1100	Metabolic pathways	Metabolism	AN0024.2 | AN0034.2 | AN0554.2 | AN0567.2 | AN0593.2 | AN0613.2 | AN0654.2 | AN0712.2 | AN0875.2 | AN0942.2 | AN1140.2 | AN1726.2 | AN1823.2 | AN1895.2 | AN1897.2 | AN1899.2 | AN2133.2 | AN2248.2 | AN2334.2 | AN2407.2 | AN2653.2 | AN2723.2 | AN2828.2 | AN2860.2 | AN3201.2 | AN3291.2 | AN3380.2 | AN3591.2 | AN3916.2 | AN4353.2 | AN4688.2 | AN4690.2 | AN4829.2 | AN5138.2 | AN5273.2 | AN5310.2 | AN5…	3.242108e-7	9.88843e-06	63 / 680	63 / 1193
254	Aflatoxin biosynthesis	Metabolism	AN7812.2 | AN7816.2 | AN7817.2 | AN7818.2 | AN7821.2 | AN7825.2	8.380808e-7	1.7041e-05	6 / 8	6 / 1193
360	Phenylalanine metabolism	Metabolism	AN1140.2 | AN1899.2 | AN2662.2 | AN2879.2 | AN3291.2 | AN5690.2 | AN7388.2 | AN7641.2 | AN8454.2	4.84734e-06	7.3922e-05	9 / 25	9 / 1193
410	beta-Alanine metabolism	Metabolism	AN0554.2 | AN1823.2 | AN2248.2 | AN3591.2 | AN5690.2 | AN6658.2 | AN7641.2 | AN8454.2	1.04881e-05	0.00011306	8 / 21	8 / 1193
350	Tyrosine metabolism	Metabolism	AN0024.2 | AN1140.2 | AN1895.2 | AN1897.2 | AN1899.2 | AN3291.2 | AN5690.2 | AN7315.2 | AN7641.2 | AN8454.2	1.11206e-05	0.00011306	10 / 34	10 / 1193
1220	Degradation of aromatic compounds	Metabolism	AN0024.2 | AN2653.2 | AN2860.2 | AN5310.2 | AN7684.2 | AN8131.2 | AN8349.2 | AN9161.2	1.57008e-05	0.000136822	8 / 22	8 / 1193
650	Butanoate metabolism	Metabolism	AN2248.2 | AN5273.2 | AN5669.2 | AN5852.2 | AN7315.2 | AN9394.2	0.000480577	0.0036644	6 / 19	6 / 1193
72	Synthesis and degradation of ketone bodies	Metabolism	AN5273.2 | AN5669.2 | AN9394.2	0.00174585	0.011833	3 / 5	3 / 1193
40	Pentose and glucuronate interconversions	Metabolism	AN0554.2 | AN0942.2 | AN2860.2 | AN4829.2 | AN8891.2 | AN9064.2	0.00235977	0.0143946	6 / 25	6 / 1193
511	Other glycan degradation	Metabolism	AN1742.2 | AN3201.2 | AN6388.2	0.00334491	0.0183525	3 / 6	3 / 1193
561	Glycerolipid metabolism	Metabolism	AN0034.2 | AN0554.2 | AN2860.2 | AN3916.2 | AN6943.2	0.00361033	0.0183525	5 / 19	5 / 1193
460	Cyanoamino acid metabolism	Metabolism	AN0712.2 | AN2828.2 | AN4577.2 | AN5976.2	0.00509681	0.0239158	4 / 13	4 / 1193
1110	Biosynthesis of secondary metabolites	Metabolism	AN0024.2 | AN0554.2 | AN0654.2 | AN0712.2 | AN1726.2 | AN2334.2 | AN2407.2 | AN2723.2 | AN2828.2 | AN2860.2 | AN3291.2 | AN3862.2 | AN4871.2 | AN5138.2 | AN5273.2 | AN5454.2 | AN5690.2 | AN5852.2 | AN5976.2 | AN6943.2 | AN7641.2 | AN8143.2 | AN8396.2 | AN8454.2 | AN8559.2 | AN9178.2	0.00695062	0.0302848	26 / 281	26 / 1193
330	Arginine and proline metabolism	Metabolism	AN0554.2 | AN2662.2 | AN2879.2 | AN3291.2 | AN6658.2 | AN7451.2 | AN7669.2	0.00901082	0.036644	7 / 42	7 / 1193

## Sheet: Sheet 5
Terms characteristic for lactose containing cultures.
Upregulated in	lactose containing cultures relative to all the three other cultures
FunCat ID	FunCat description	FunCat main category	Gene ID(s)	Exact p-value	Adjusted p-value	# genes / category	# genes / input
1.2	secondary metabolism	Metabolism	ANIA_00147 | ANIA_00149 | ANIA_00216 | ANIA_00610 | ANIA_01035 | ANIA_01242 | ANIA_01806 | ANIA_01808 | ANIA_02358 | ANIA_02407 | ANIA_02557 | ANIA_02558 | ANIA_02665 | ANIA_02994 | ANIA_03339 | ANIA_03340 | ANIA_03351 | ANIA_03490 | ANIA_03491 | ANIA_03557 | ANIA_04337 | ANIA_05295 | ANIA_05370 | ANIA_06314 | ANIA_06412 | ANIA_06444 | ANIA_06447 | ANIA_06459 | ANIA_06784 | ANIA_07071 | ANIA_0715…	9.506325e-15	1.872746e-12	63 / 1068	63 / 286
32.05.03	defense related proteins	Cell rescue, defense and virulence	ANIA_07897 | ANIA_08139 | ANIA_08141 | ANIA_08184 | ANIA_08250 | ANIA_08437 | ANIA_09034 | ANIA_10057 | ANIA_10124	1.91994e-05	0.00189114	9 / 68	9 / 286
GO ID	GO name	GO namespace	Gene ID(s)	Exact p-value	Adjusted p-value	# genes / category	# genes / input
GO:0004557	alpha-galactosidase activity	MF	AN8138 | AN9035	0.000431895	0.0128432	2 / 4	2 / 286
GO:0052692	raffinose alpha-galactosidase activity	MF	AN8138 | AN9035	0.000431895	0.0128432	2 / 4	2 / 286
GO:0004553	hydrolase activity, hydrolyzing O-glycosyl compounds	MF	AN8138 | AN9035 | AN0667 | AN2359	0.0007293	0.0128432	4 / 55	4 / 286
GO:0046355	mannan catabolic process	BP	AN8138 | AN0667	0.00107026	0.0128432	2 / 6	2 / 286
GO:0006012	galactose metabolic process	BP	AN8138 | AN9035	0.00107026	0.0128432	2 / 6	2 / 286
GO:0016798	hydrolase activity, acting on glycosyl bonds	MF	AN8138 | AN9035 | AN0667 | AN2359	0.00219054	0.0219054	4 / 73	4 / 286
GO:0008270	zinc ion binding	MF	AN8667 | AN7895 | AN0667	0.005371	0.032465	3 / 44	3 / 286
GO:0005975	carbohydrate metabolic process	BP	AN8138 | AN9035 | AN0667 | AN2359	0.00719043	0.032465	4 / 100	4 / 286
GO:0005576	extracellular region	CC	AN8138 | AN9035 | AN0667 | AN2359	0.0172211	0.0478023	4 / 127	4 / 286
Downregulated in	lactose containing cultures relative to all the three other cultures
GO ID	GO name	GO namespace	Gene ID(s)	Exact p-value	Adjusted p-value	# genes / category	# genes / input
GO:0005576	extracellular region	CC	AN1571 | AN2612 | AN2572 | AN3389	0.00846983	0.047431	4 / 127	4 / 69

## Sheet: Sheet 6
Terms characteristic for arabinogalactan containing cultures.
Upregulated in	arabinogalactan containing cultures relative to all the three other cultures
FunCat ID	FunCat description	FunCat main category	Gene ID(s)	Exact p-value	Adjusted p-value	# genes / category	# genes / input
01.05.02.07	sugar, glucoside, polyol and carboxylate catabolism	Metabolism	ANIA_00423 | ANIA_00712 | ANIA_00741 | ANIA_01273 | ANIA_01277 | ANIA_01477 | ANIA_02217 | ANIA_02227 | ANIA_02378 | ANIA_02463 | ANIA_02533 | ANIA_02709 | ANIA_03297 | ANIA_03563 | ANIA_03613 | ANIA_03860 | ANIA_03949 | ANIA_04829 | ANIA_05282 | ANIA_05463 | ANIA_05976 | ANIA_05984 | ANIA_05985 | ANIA_05986 | ANIA_06427 | ANIA_06428 | ANIA_06751 | ANIA_07275 | ANIA_07396 | ANIA_07413 | ANIA_0778…	3.153322e-16	5.707512e-14	38 / 235	38 / 322
01.05.03	polysaccharide metabolism	Metabolism	ANIA_00423 | ANIA_00712 | ANIA_00741 | ANIA_00941 | ANIA_01273 | ANIA_01277 | ANIA_01477 | ANIA_01604 | ANIA_01772 | ANIA_01818 | ANIA_02227 | ANIA_02463 | ANIA_03337 | ANIA_03418 | ANIA_03860 | ANIA_03949 | ANIA_05176 | ANIA_05282 | ANIA_05463 | ANIA_05885 | ANIA_05976 | ANIA_06093 | ANIA_06428 | ANIA_06751 | ANIA_07152 | ANIA_07230 | ANIA_07396 | ANIA_07401 | ANIA_07598 | ANIA_07864 | ANIA_0840…	1.736213e-15	1.571273e-13	37 / 234	37 / 322
1.05	C-compound and carbohydrate metabolism	Metabolism	ANIA_00370 | ANIA_00423 | ANIA_00567 | ANIA_00618 | ANIA_00712 | ANIA_00741 | ANIA_00746 | ANIA_00941 | ANIA_01273 | ANIA_01277 | ANIA_01285 | ANIA_01616 | ANIA_01804 | ANIA_02217 | ANIA_02378 | ANIA_02398 | ANIA_02549 | ANIA_02601 | ANIA_02860 | ANIA_03184 | ANIA_03205 | ANIA_03210 | ANIA_03297 | ANIA_03337 | ANIA_03531 | ANIA_03563 | ANIA_03564 | ANIA_03573 | ANIA_03613 | ANIA_03741 | ANIA_0390…	1.453415e-12	8.768936e-11	72 / 919	72 / 322
1.2	secondary metabolism	Metabolism	ANIA_00013 | ANIA_00025 | ANIA_00231 | ANIA_00233 | ANIA_00364 | ANIA_00370 | ANIA_00423 | ANIA_00567 | ANIA_00619 | ANIA_00992 | ANIA_01109 | ANIA_01577 | ANIA_01586 | ANIA_01616 | ANIA_01737 | ANIA_01830 | ANIA_02398 | ANIA_02549 | ANIA_02569 | ANIA_02601 | ANIA_03041 | ANIA_03205 | ANIA_03207 | ANIA_03248 | ANIA_03531 | ANIA_03564 | ANIA_03573 | ANIA_03902 | ANIA_04576 | ANIA_04829 | ANIA_0526…	7.764492e-8	3.51343e-06	68 / 1068	68 / 322
01.01.09.04.02	degradation of phenylalanine	Metabolism	ANIA_01895 | ANIA_01896 | ANIA_01897 | ANIA_01899 | ANIA_02549 | ANIA_04643 | ANIA_05837 | ANIA_07773 | ANIA_08108 | ANIA_10657 | ANIA_11034	2.39725e-06	8.67806e-05	11 / 56	11 / 322
02.16.01	alcohol fermentation	Energy	ANIA_02860 | ANIA_03205 | ANIA_03573 | ANIA_03741 | ANIA_04540 | ANIA_08979 | ANIA_09114 | ANIA_09198 | ANIA_10358	9.60741e-06	0.000289824	9 / 42	9 / 322
20.09.18	cellular import	Cellular transport, transport facilitation and transport routes	ANIA_00013 | ANIA_00233 | ANIA_01109 | ANIA_01577 | ANIA_01830 | ANIA_02465 | ANIA_02601 | ANIA_03210 | ANIA_03221 | ANIA_05304 | ANIA_05734 | ANIA_06400 | ANIA_07067 | ANIA_07119 | ANIA_08347 | ANIA_08423 | ANIA_08467 | ANIA_08889 | ANIA_08912 | ANIA_08955 | ANIA_08956 | ANIA_09010 | ANIA_10428	0.000183815	0.0045674	23 / 295	23 / 322
01.01.09.05.02	degradation of tyrosine	Metabolism	ANIA_00231 | ANIA_01895 | ANIA_01896 | ANIA_01897 | ANIA_01899 | ANIA_08108	0.000201874	0.0045674	6 / 26	6 / 322
20.01.03	C-compound and carbohydrate transport	Cellular transport, transport facilitation and transport routes	ANIA_00013 | ANIA_00233 | ANIA_01109 | ANIA_01577 | ANIA_01830 | ANIA_02465 | ANIA_02601 | ANIA_03210 | ANIA_05304 | ANIA_05551 | ANIA_05734 | ANIA_06413 | ANIA_07067 | ANIA_07119 | ANIA_08347 | ANIA_08423 | ANIA_08467 | ANIA_08889 | ANIA_08912 | ANIA_09306 | ANIA_10428	0.000468997	0.00943205	21 / 275	21 / 322
20.03.02.02.01	proton driven symporter	Cellular transport, transport facilitation and transport routes	ANIA_02465 | ANIA_02601 | ANIA_03210 | ANIA_05304 | ANIA_07067 | ANIA_07119	0.000793817	0.0143681	6 / 33	6 / 322
01.01.09.04.01	biosynthesis of phenylalanine	Metabolism	ANIA_01899 | ANIA_02549 | ANIA_04643 | ANIA_05837 | ANIA_07773 | ANIA_10657 | ANIA_11034	0.00187287	0.0296055	7 / 52	7 / 322
01.20.35.01	metabolism of phenylpropanoids	Metabolism	ANIA_00231 | ANIA_02549 | ANIA_05838 | ANIA_08513 | ANIA_10657 | ANIA_11034	0.00196856	0.0296055	6 / 39	6 / 322
20.09.18.07	non-vesicular cellular import	Cellular transport, transport facilitation and transport routes	ANIA_00013 | ANIA_00218 | ANIA_00233 | ANIA_01109 | ANIA_01577 | ANIA_03210 | ANIA_03221 | ANIA_05304 | ANIA_05551 | ANIA_05734 | ANIA_07067 | ANIA_07119 | ANIA_07157 | ANIA_08347 | ANIA_08889 | ANIA_08955 | ANIA_09010 | ANIA_10428	0.00212636	0.0296055	18 / 248	18 / 322
32.07.01	detoxification involving cytochrome P450	Cell rescue, defense and virulence	ANIA_03570 | ANIA_04643 | ANIA_05665 | ANIA_05837 | ANIA_05838 | ANIA_07773 | ANIA_07932 | ANIA_08579 | ANIA_10573	0.00312111	0.0403514	9 / 88	9 / 322
01.06.06.05	sesquiterpenes metabolism	Metabolism	ANIA_01737 | ANIA_07522 | ANIA_07932 | ANIA_10573	0.00353993	0.0427151	4 / 19	4 / 322
01.05.06.07	C-2 compound and organic acid catabolism	Metabolism	ANIA_03205 | ANIA_03563 | ANIA_03741 | ANIA_08979 | ANIA_10358	0.00437429	0.0494841	5 / 32	5 / 322
GO ID	GO name	GO namespace	Gene ID(s)	Exact p-value	Adjusted p-value	# genes / category	# genes / input
GO:0005975	carbohydrate metabolic process	BP	AN1277 | AN7152 | AN6093 | AN2632 | AN7908 | AN0712 | AN1804 | AN5976 | AN2227 | AN7396 | AN3949 | AN8401 | AN5176 | AN5282 | AN3418 | AN1285 | AN1772 | AN5267 | AN3297 | AN6427 | AN7413 | AN9276 | AN2569 | AN8761 | AN0741 | AN3337 | AN3613 | AN1818 | AN0423	1.246541e-18	1.483384e-16	29 / 100	29 / 322
GO:0005576	extracellular region	CC	AN1277 | AN7152 | AN5309 | AN6093 | AN2632 | AN7908 | AN1804 | AN5976 | AN2227 | AN7396 | AN3949 | AN8401 | AN5176 | AN5282 | AN3418 | AN1285 | AN1772 | AN5267 | AN3297 | AN6427 | AN7413 | AN9276 | AN2569 | AN8761 | AN0741 | AN3337 | AN3613 | AN1818 | AN0423	2.235791e-15	1.330296e-13	29 / 127	29 / 322
GO:0000272	polysaccharide catabolic process	BP	AN1277 | AN7152 | AN6093 | AN2632 | AN7908 | AN0712 | AN1804 | AN5976 | AN2227 | AN7396 | AN3949 | AN8401 | AN5176 | AN5282 | AN3418 | AN1285 | AN1772 | AN5267 | AN2569 | AN0741 | AN3337 | AN3613 | AN1818	1.823319e-14	7.232497e-13	23 / 76	23 / 322
GO:0016798	hydrolase activity, acting on glycosyl bonds	MF	AN1277 | AN7152 | AN2632 | AN7908 | AN0712 | AN1804 | AN5976 | AN2227 | AN7396 | AN3949 | AN8401 | AN5176 | AN5282 | AN3418 | AN1285 | AN3297 | AN6427 | AN7413 | AN9276 | AN8761 | AN3613 | AN1818	1.050062e-13	3.123936e-12	22 / 73	22 / 322
GO:0008152	metabolic process	BP	AN1277 | AN2621 | AN7152 | AN11015 | AN1503 | AN5309 | AN2632 | AN7908 | AN0712 | AN1804 | AN5976 | AN2227 | AN7396 | AN3949 | AN8401 | AN5176 | AN5282 | AN3418 | AN1285 | AN1896 | AN3297 | AN6427 | AN7413 | AN9276 | AN8761 | AN3613 | AN1818	9.807415e-11	2.334165e-9	27 / 156	27 / 322
GO:0004553	hydrolase activity, hydrolyzing O-glycosyl compounds	MF	AN7152 | AN0712 | AN1804 | AN5976 | AN2227 | AN7396 | AN3949 | AN8401 | AN5176 | AN5282 | AN3418 | AN1285 | AN3297 | AN6427 | AN9276 | AN3613 | AN1818	1.375029e-10	2.727141e-9	17 / 55	17 / 322
GO:0016787	hydrolase activity	MF	AN1277 | AN7152 | AN5309 | AN6093 | AN2632 | AN7908 | AN0712 | AN1804 | AN5976 | AN2227 | AN7396 | AN3949 | AN8401 | AN5176 | AN5282 | AN3418 | AN1285 | AN1772 | AN5267 | AN1896 | AN3297 | AN6427 | AN7413 | AN9276 | AN8761 | AN3613 | AN1818	9.789201e-9	1.664164e-7	27 / 187	27 / 322
GO:0030245	cellulose catabolic process	BP	AN6093 | AN0712 | AN1804 | AN5976 | AN2227 | AN7396 | AN3949 | AN5176 | AN5282 | AN3418 | AN1285	1.953428e-8	2.905725e-7	11 / 27	11 / 322
GO:0005575	cellular_component	CC	AN1277 | AN2621 | AN7152 | AN8979 | AN3741 | AN11015 | AN1503 | AN9274 | AN6093 | AN2632 | AN7908 | AN0712 | AN1804 | AN5976 | AN7396 | AN3949 | AN8401 | AN5176 | AN5282 | AN3418 | AN1285 | AN1772 | AN5267 | AN1896 | AN1897 | AN3297 | AN6427 | AN7413 | AN8761 | AN0741 | AN7811 | AN0423	2.636321e-7	3.4858e-06	32 / 300	32 / 322
GO:0045493	xylan catabolic process	BP	AN6093 | AN2632 | AN7908 | AN8401 | AN1772 | AN5267 | AN3613 | AN1818	1.0439e-06	1.24224e-05	8 / 18	8 / 322
GO:0016985	mannan endo-1,4-beta-mannosidase activity	MF	AN3297 | AN6427 | AN7413 | AN9276	0.000101167	0.00100324	4 / 6	4 / 322
GO:0046556	alpha-L-arabinofuranosidase activity	MF	AN1277 | AN2632 | AN7908 | AN8401	0.000101167	0.00100324	4 / 6	4 / 322
GO:0008422	beta-glucosidase activity	MF	AN0712 | AN1804 | AN5976 | AN2227 | AN7396 | AN3949	0.000134615	0.00115591	6 / 17	6 / 322
GO:0006572	tyrosine catabolic process	BP	AN1896 | AN1897 | AN1895	0.000145703	0.00115591	3 / 3	3 / 322
GO:0006559	L-phenylalanine catabolic process	BP	AN1896 | AN1897 | AN1895	0.000145703	0.00115591	3 / 3	3 / 322
GO:0030243	cellulose metabolic process	BP	AN5176 | AN5282 | AN3418 | AN1285	0.000226838	0.00168711	4 / 7	4 / 322
GO:0009251	glucan catabolic process	BP	AN0712 | AN1804 | AN5282 | AN3418 | AN1285	0.000332375	0.00232662	5 / 13	5 / 322
GO:0019566	arabinose metabolic process	BP	AN1277 | AN2632 | AN7908 | AN0423	0.00043597	0.00273055	4 / 8	4 / 322
GO:0042732	D-xylose metabolic process	BP	AN8401 | AN3613 | AN1818 | AN0423	0.00043597	0.00273055	4 / 8	4 / 322
GO:0045490	pectin catabolic process	BP	AN1277 | AN7908 | AN2569 | AN8761 | AN0741 | AN3337	0.00110125	0.00655246	6 / 24	6 / 322
GO:0052689	carboxylic ester hydrolase activity	MF	AN5309 | AN6093 | AN1772 | AN5267	0.00120791	0.00684482	4 / 10	4 / 322
GO:0006071	glycerol metabolic process	BP	AN8979 | AN3741 | AN0423	0.00134961	0.00698275	3 / 5	3 / 322
GO:0046373	L-arabinose metabolic process	BP	AN1277 | AN2632 | AN7908	0.00134961	0.00698275	3 / 5	3 / 322
GO:0046355	mannan catabolic process	BP	AN7152 | AN3297 | AN6427	0.00259805	0.012882	3 / 6	3 / 322
GO:0008810	cellulase activity	MF	AN3418 | AN1285 | AN7413	0.00437645	0.0192888	3 / 7	3 / 322
GO:0016162	cellulose 1,4-beta-cellobiosidase activity	MF	AN5176 | AN5282	0.00821541	0.0349155	2 / 3	2 / 322
KEGG pathway ID	KEGG pathway name	KEGG main category	Gene ID(s)	Exact p-value	Adjusted p-value	# genes / category	# genes / input
1100	Metabolic pathways	Metabolism	AN0423.2 | AN0567.2 | AN0712.2 | AN0941.2 | AN1285.2 | AN1586.2 | AN1745.2 | AN1895.2 | AN1896.2 | AN1897.2 | AN1899.2 | AN2217.2 | AN2227.2 | AN2621.2 | AN2723.2 | AN2860.2 | AN3184.2 | AN4576.2 | AN4829.2 | AN5698.2 | AN5976.2 | AN5984.2 | AN5986.2 | AN7396.2 | AN7864.2 | AN8108.2 | AN8401.2 | AN8979.2	3.640737e-8	9.465917e-7	28 / 680	28 / 322
500	Starch and sucrose metabolism	Metabolism	AN0712.2 | AN0941.2 | AN1285.2 | AN2217.2 | AN2227.2 | AN5976.2 | AN7396.2 | AN7864.2 | AN8401.2	8.23795e-8	1.07093e-06	9 / 46	9 / 322
350	Tyrosine metabolism	Metabolism	AN1586.2 | AN1895.2 | AN1896.2 | AN1897.2 | AN1899.2 | AN8108.2 | AN8979.2	2.01588e-06	1.54588e-05	7 / 34	7 / 322
460	Cyanoamino acid metabolism	Metabolism	AN0712.2 | AN2217.2 | AN2227.2 | AN5976.2 | AN7396.2	2.37828e-06	1.54588e-05	5 / 13	5 / 322
1110	Biosynthesis of secondary metabolites	Metabolism	AN0712.2 | AN1277.2 | AN1586.2 | AN2217.2 | AN2227.2 | AN2621.2 | AN2723.2 | AN2860.2 | AN3184.2 | AN5698.2 | AN5976.2 | AN5984.2 | AN7396.2 | AN8979.2	0.00033256	0.00172931	14 / 281	14 / 322
40	Pentose and glucuronate interconversions	Metabolism	AN0423.2 | AN0741.2 | AN2860.2 | AN4829.2	0.00114372	0.00495612	4 / 25	4 / 322
1220	Degradation of aromatic compounds	Metabolism	AN2860.2 | AN4576.2 | AN8979.2	0.00814316	0.030246	3 / 22	3 / 322
Downregulated in	arabinogalactan containing cultures relative to all the three other cultures
FunCat ID	FunCat description	FunCat main category	Gene ID(s)	Exact p-value	Adjusted p-value	# genes / category	# genes / input
20.09.18	cellular import	Cellular transport, transport facilitation and transport routes	ANIA_02794 | ANIA_02962 | ANIA_03117 | ANIA_03357 | ANIA_03408 | ANIA_05549 | ANIA_06669 | ANIA_06932 | ANIA_08733 | ANIA_09184 | ANIA_10136	0.000281833	0.0204908	11 / 295	11 / 148
20.03	transport facilities	Cellular transport, transport facilitation and transport routes	ANIA_02794 | ANIA_02962 | ANIA_03117 | ANIA_03254 | ANIA_03357 | ANIA_03408 | ANIA_03997 | ANIA_06669 | ANIA_06703 | ANIA_07250 | ANIA_07510 | ANIA_07597 | ANIA_09184 | ANIA_10136	0.00032269	0.0204908	14 / 460	14 / 148
2.45	energy conversion and regeneration	Energy	ANIA_06057 | ANIA_08099 | ANIA_08360 | ANIA_11002	0.000634796	0.026873	4 / 37	4 / 148

## Sheet: Sheet 7
Terms characteristic for carbon starved cultures.
Upregulated in	carbon starved cultures relative to all the three other cultures
FunCat ID	FunCat description	FunCat main category	Gene ID(s)	Exact p-value	Adjusted p-value	# genes / category	# genes / input
01.05.03	polysaccharide metabolism	Metabolism	ANIA_00472 | ANIA_00779 | ANIA_01257 | ANIA_02356 | ANIA_02395 | ANIA_03402 | ANIA_03790 | ANIA_04052 | ANIA_04372 | ANIA_04504 | ANIA_04823 | ANIA_04825 | ANIA_04871 | ANIA_05061 | ANIA_05556 | ANIA_06656 | ANIA_06929 | ANIA_07345 | ANIA_07349 | ANIA_07613 | ANIA_09042 | ANIA_10482 | ANIA_10488 | ANIA_11143 | ANIA_11149 | ANIA_11233	3.328336e-7	9.78531e-05	26 / 234	26 / 433
20.09.18.07	non-vesicular cellular import	Cellular transport, transport facilitation and transport routes	ANIA_00374 | ANIA_01073 | ANIA_01185 | ANIA_01681 | ANIA_02074 | ANIA_02372 | ANIA_02869 | ANIA_03220 | ANIA_03722 | ANIA_04106 | ANIA_04604 | ANIA_04621 | ANIA_04628 | ANIA_04630 | ANIA_04826 | ANIA_06923 | ANIA_07344 | ANIA_08084 | ANIA_08279 | ANIA_08366 | ANIA_08413 | ANIA_08448 | ANIA_08915 | ANIA_09168 | ANIA_10267 | ANIA_10487	1.03888e-06	0.000102176	26 / 248	26 / 433
16.05	polysaccharide binding	Protein with binding function or cofactor requirement (structural or analytic)	ANIA_02356 | ANIA_03790 | ANIA_04823 | ANIA_04871 | ANIA_05061 | ANIA_07349 | ANIA_07613 | ANIA_09042 | ANIA_11233	1.04262e-06	0.000102176	9 / 31	9 / 433
1.2	secondary metabolism	Metabolism	ANIA_00195 | ANIA_00208 | ANIA_00374 | ANIA_00489 | ANIA_00533 | ANIA_00547 | ANIA_00586 | ANIA_01077 | ANIA_01088 | ANIA_01101 | ANIA_01540 | ANIA_01702 | ANIA_01877 | ANIA_02564 | ANIA_02566 | ANIA_02606 | ANIA_02611 | ANIA_02653 | ANIA_02677 | ANIA_02786 | ANIA_02821 | ANIA_02895 | ANIA_03220 | ANIA_03255 | ANIA_03256 | ANIA_03701 | ANIA_03722 | ANIA_03863 | ANIA_03884 | ANIA_03887 | ANIA_0463…	2.50792e-06	0.000184332	67 / 1068	67 / 433
20.03	transport facilities	Cellular transport, transport facilitation and transport routes	ANIA_01059 | ANIA_01073 | ANIA_01185 | ANIA_01290 | ANIA_01681 | ANIA_01702 | ANIA_02074 | ANIA_02372 | ANIA_02869 | ANIA_03722 | ANIA_03862 | ANIA_03915 | ANIA_04106 | ANIA_04604 | ANIA_04621 | ANIA_04628 | ANIA_04630 | ANIA_04817 | ANIA_04826 | ANIA_05559 | ANIA_06381 | ANIA_06451 | ANIA_06928 | ANIA_07304 | ANIA_07344 | ANIA_07958 | ANIA_08198 | ANIA_08366 | ANIA_08413 | ANIA_08760 | ANIA_0891…	9.55421e-06	0.000561788	36 / 460	36 / 433
20.01.03	C-compound and carbohydrate transport	Cellular transport, transport facilitation and transport routes	ANIA_00208 | ANIA_01059 | ANIA_01702 | ANIA_02372 | ANIA_02869 | ANIA_03220 | ANIA_03722 | ANIA_03915 | ANIA_04106 | ANIA_04173 | ANIA_04621 | ANIA_04630 | ANIA_06381 | ANIA_06923 | ANIA_07344 | ANIA_07958 | ANIA_08084 | ANIA_08198 | ANIA_08366 | ANIA_08413 | ANIA_08448 | ANIA_09168 | ANIA_10267 | ANIA_10487 | ANIA_10984	2.17358e-05	0.00106506	25 / 275	25 / 433
01.25.01	extracellular polysaccharide degradation	Metabolism	ANIA_00779 | ANIA_03790 | ANIA_04823 | ANIA_04825 | ANIA_05061 | ANIA_07349 | ANIA_09042	0.000156208	0.00656072	7 / 33	7 / 433
32.10.07	degradation / modification of foreign (exogenous) polysaccharides	Cell rescue, defense and virulence	ANIA_00779 | ANIA_04372 | ANIA_04825 | ANIA_05061 | ANIA_05214 | ANIA_06656	0.000286933	0.0105448	6 / 26	6 / 433
20.09.18	cellular import	Cellular transport, transport facilitation and transport routes	ANIA_00374 | ANIA_01073 | ANIA_01185 | ANIA_01681 | ANIA_01702 | ANIA_02372 | ANIA_02869 | ANIA_03915 | ANIA_04106 | ANIA_04604 | ANIA_04621 | ANIA_04628 | ANIA_05549 | ANIA_06381 | ANIA_06923 | ANIA_07344 | ANIA_07958 | ANIA_08198 | ANIA_08279 | ANIA_08915 | ANIA_09168 | ANIA_10487 | ANIA_10876	0.000473372	0.0154635	23 / 295	23 / 433
GO ID	GO name	GO namespace	Gene ID(s)	Exact p-value	Adjusted p-value	# genes / category	# genes / input
GO:0016798	hydrolase activity, acting on glycosyl bonds	MF	AN7345 | AN10482 | AN4871 | AN5214 | AN4052 | AN4372 | AN6656	0.000112259	0.00931748	7 / 73	7 / 433
GO:0071555	cell wall organization	BP	AN7345 | AN8006 | AN4052 | AN4372 | AN6656	0.000557863	0.015506	5 / 42	5 / 433
GO:0005576	extracellular region	CC	AN7345 | AN10482 | AN4871 | AN8006 | AN5214 | AN4052 | AN4372 | AN6656	0.000605087	0.015506	8 / 127	8 / 433
GO:0005975	carbohydrate metabolic process	BP	AN7345 | AN10482 | AN4871 | AN5214 | AN4052 | AN4372 | AN6656	0.000867706	0.015506	7 / 100	7 / 433
GO:0042243	asexual spore wall assembly	BP	AN8006 | AN1937	0.000934098	0.015506	2 / 3	2 / 433
GO:0004553	hydrolase activity, hydrolyzing O-glycosyl compounds	MF	AN7345 | AN10482 | AN4871 | AN5214 | AN4052	0.00199449	0.0275904	5 / 55	5 / 433
GO:0008152	metabolic process	BP	AN7345 | AN10074 | AN10482 | AN4871 | AN5214 | AN4052 | AN4372 | AN6656	0.00257132	0.0304885	8 / 156	8 / 433
KEGG pathway ID	KEGG pathway name	KEGG main category	Gene ID(s)	Exact p-value	Adjusted p-value	# genes / category	# genes / input
500	Starch and sucrose metabolism	Metabolism	AN3402.2 | AN4052.2 | AN4372.2 | AN5214.2 | AN6656.2 | AN7345.2	0.000100467	0.00341589	6 / 46	6 / 433
565	Ether lipid metabolism	Metabolism	AN1713.2 | AN7691.2 | AN8546.2	0.000981057	0.016678	3 / 12	3 / 433
Downregulated in	carbon starved cultures relative to all the three other cultures
FunCat ID	FunCat description	FunCat main category	Gene ID(s)	Exact p-value	Adjusted p-value	# genes / category	# genes / input
32.01.05	heat shock response	Cell rescue, defense and virulence	ANIA_02432 | ANIA_02530 | ANIA_05781 | ANIA_06089 | ANIA_07892 | ANIA_10507	0.0002323	0.0391401	6 / 41	6 / 203
20.01.01.07.07	phosphate transport	Cellular transport, transport facilitation and transport routes	ANIA_00870 | ANIA_05935 | ANIA_08956 | ANIA_10343	0.000524171	0.0391401	4 / 18	4 / 203
01.20.15	metabolism of derivatives of dehydroquinic acid, shikimic acid and chorismic acid	Metabolism	ANIA_00354 | ANIA_00708 | ANIA_01137 | ANIA_03031	0.000524171	0.0391401	4 / 18	4 / 203
10.03.05.01	spindle pole body/centrosome and microtubule cycle	Cell cycle and DNA processing	ANIA_02128 | ANIA_03363 | ANIA_03648 | ANIA_04513 | ANIA_05815 | ANIA_08783	0.000626242	0.0391401	6 / 49	6 / 203
KEGG pathway ID	KEGG pathway name	KEGG main category	Gene ID(s)	Exact p-value	Adjusted p-value	# genes / category	# genes / input
920	Sulfur metabolism	Metabolism	AN1752.2 | AN4769.2 | AN4770.2 | AN6246.2	0.000287368	0.0106326	4 / 15	4 / 203
